# Supplementary material for: New triazole-based hybrids as neurotropic agents
Source: Royal Society of Chemistry journal article supplement (doi:10.1039/d4ra06121g), 2024-01-01

## Supplementary Information

### **New triazole based hybrids as neurotropic agents**

Samvel N. Sirakanyan,<sup>a</sup> Domenico Spinelli,<sup>b</sup> Athina Geronikaki,<sup>\*c</sup> Elmira K. Hakobyan,<sup>\*a</sup> Anti Petrou,<sup>c</sup> Victor G. Kartsev,<sup>d</sup> Hasmik A. Yegoryan,<sup>a</sup> Ervand G. Paronikyan,<sup>a</sup> Luca Zuppiroli,<sup>e</sup> Hasmik V. Jughetsyan,<sup>a</sup> Ruzanna G. Paronikyan,<sup>a</sup> Tatevik A. Arakelyan<sup>a</sup> and Anush A. Hovakimyan<sup>a</sup>

<sup>a</sup> Scientific Technological Center of Organic and Pharmaceutical Chemistry of National Academy of Science of Republic of Armenia, Institute of Fine Organic Chemistry of A.L.Mnjoyan, Armenia 0014, Yerevan, Ave. Azatutyun 26; [shnmr@mail.ru](mailto:shnmr@mail.ru)

<sup>b</sup> Dipartimento di Chimica G. Ciamician, Alma Mater Studiorum-Università di Bologna, Via F. Selmi 2, Bologna 40126, Italy; [domenico.spinelli@unibo.it](mailto:domenico.spinelli@unibo.it)

<sup>c</sup> Aristotle University of Thessaloniki, School of Pharmacy, Thessaloniki54124, Greece; [geronik@pharm.auth.gr](mailto:geronik@pharm.auth.gr);

<sup>d</sup> InterBioScreen, Moscow 119019, Russia; [vkartsev@ibscreen.chg.ru](mailto:vkartsev@ibscreen.chg.ru)

<sup>e</sup> Department of Industrial Chemistry 'Toso Montanari', Alma Mater Studiorum-Università di Bologna, Viale del Risorgimento 4, 40136 Bologna, Italy; [luca.zuppiroli@unibo.it](mailto:luca.zuppiroli@unibo.it)

\*Corresponding authors

Athina Geronikaki email: [geronik@pharm.auth.gr](mailto:geronik@pharm.auth.gr);

Elmira Hakobyan email: [hakobyan.elmira@mail.ru](mailto:hakobyan.elmira@mail.ru)

**The copies of <sup>1</sup>H, <sup>13</sup>C NMR and MS spectra of all new synthesized compounds**

20

Molecular Structure Research Centre, Yerevan, Armenia, Varian Mercury-300VX  
**HE-458**

H1 300.088 MHz, nt=16, np=32000, temp=30.0 C, lb=-0.2, solvent=DMSO/CCL4 1/3

NOCI\_19 he-458

May 15 2019

+

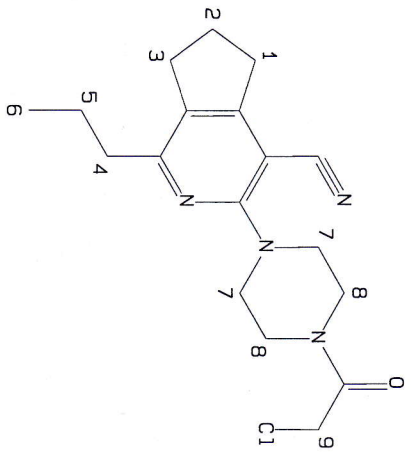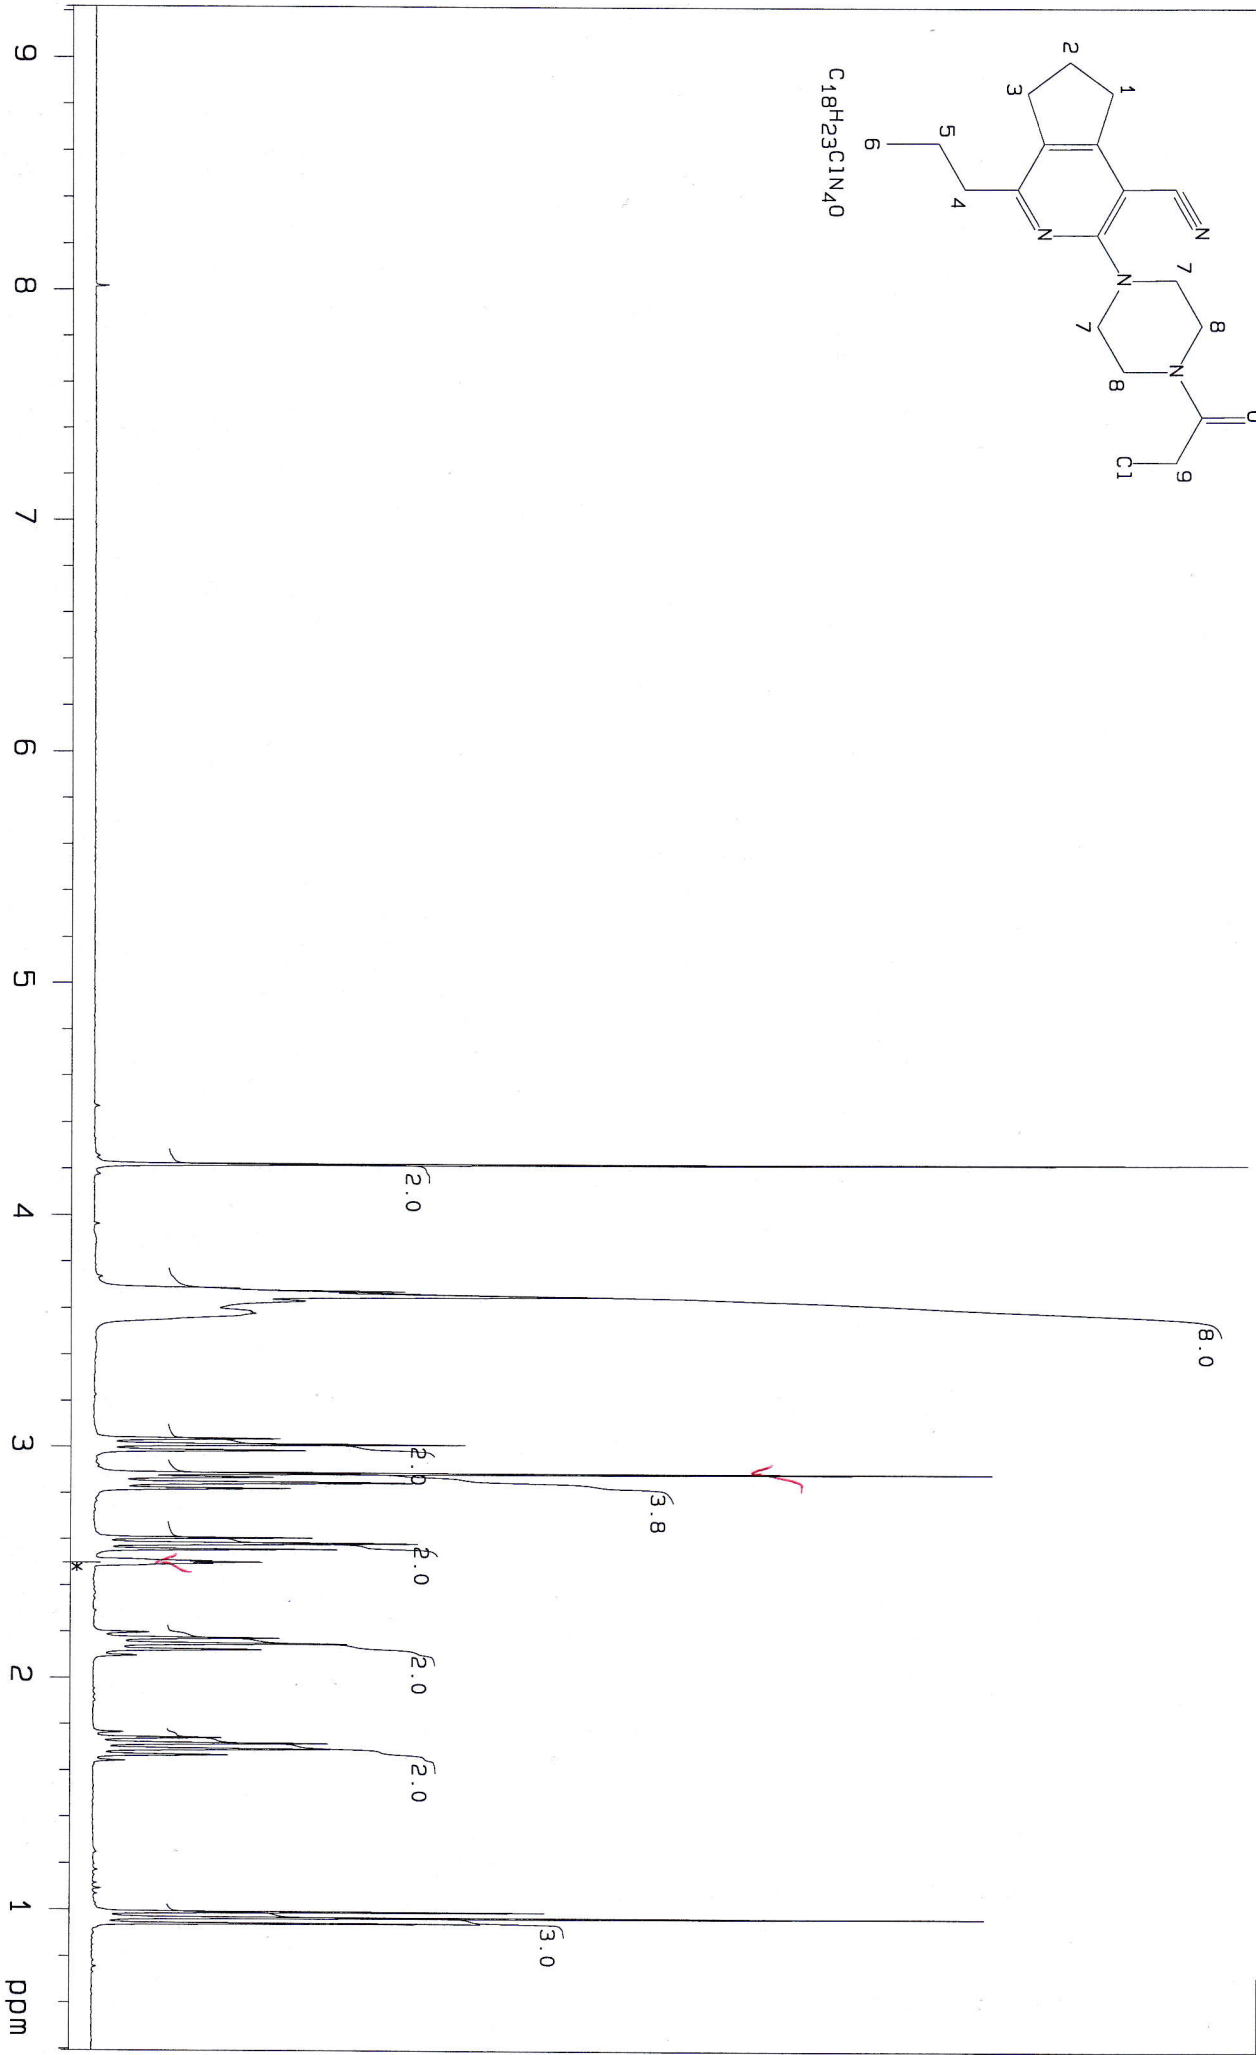

Prove

200

Molecular Structure Research Centre, Yerevan, Armenia, Varian Mercury-300VX

HE-458

C13 75.465 MHz, nt = 2144, np = 19998, temp = 30.0 C, lb = 1.0, solvent = DMSO/C4 1/3

NOCI\_19 he-458

May 15 2019

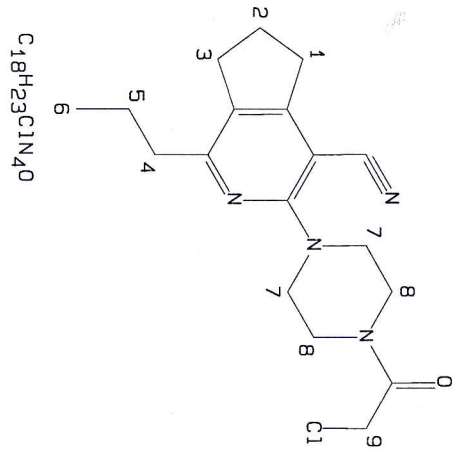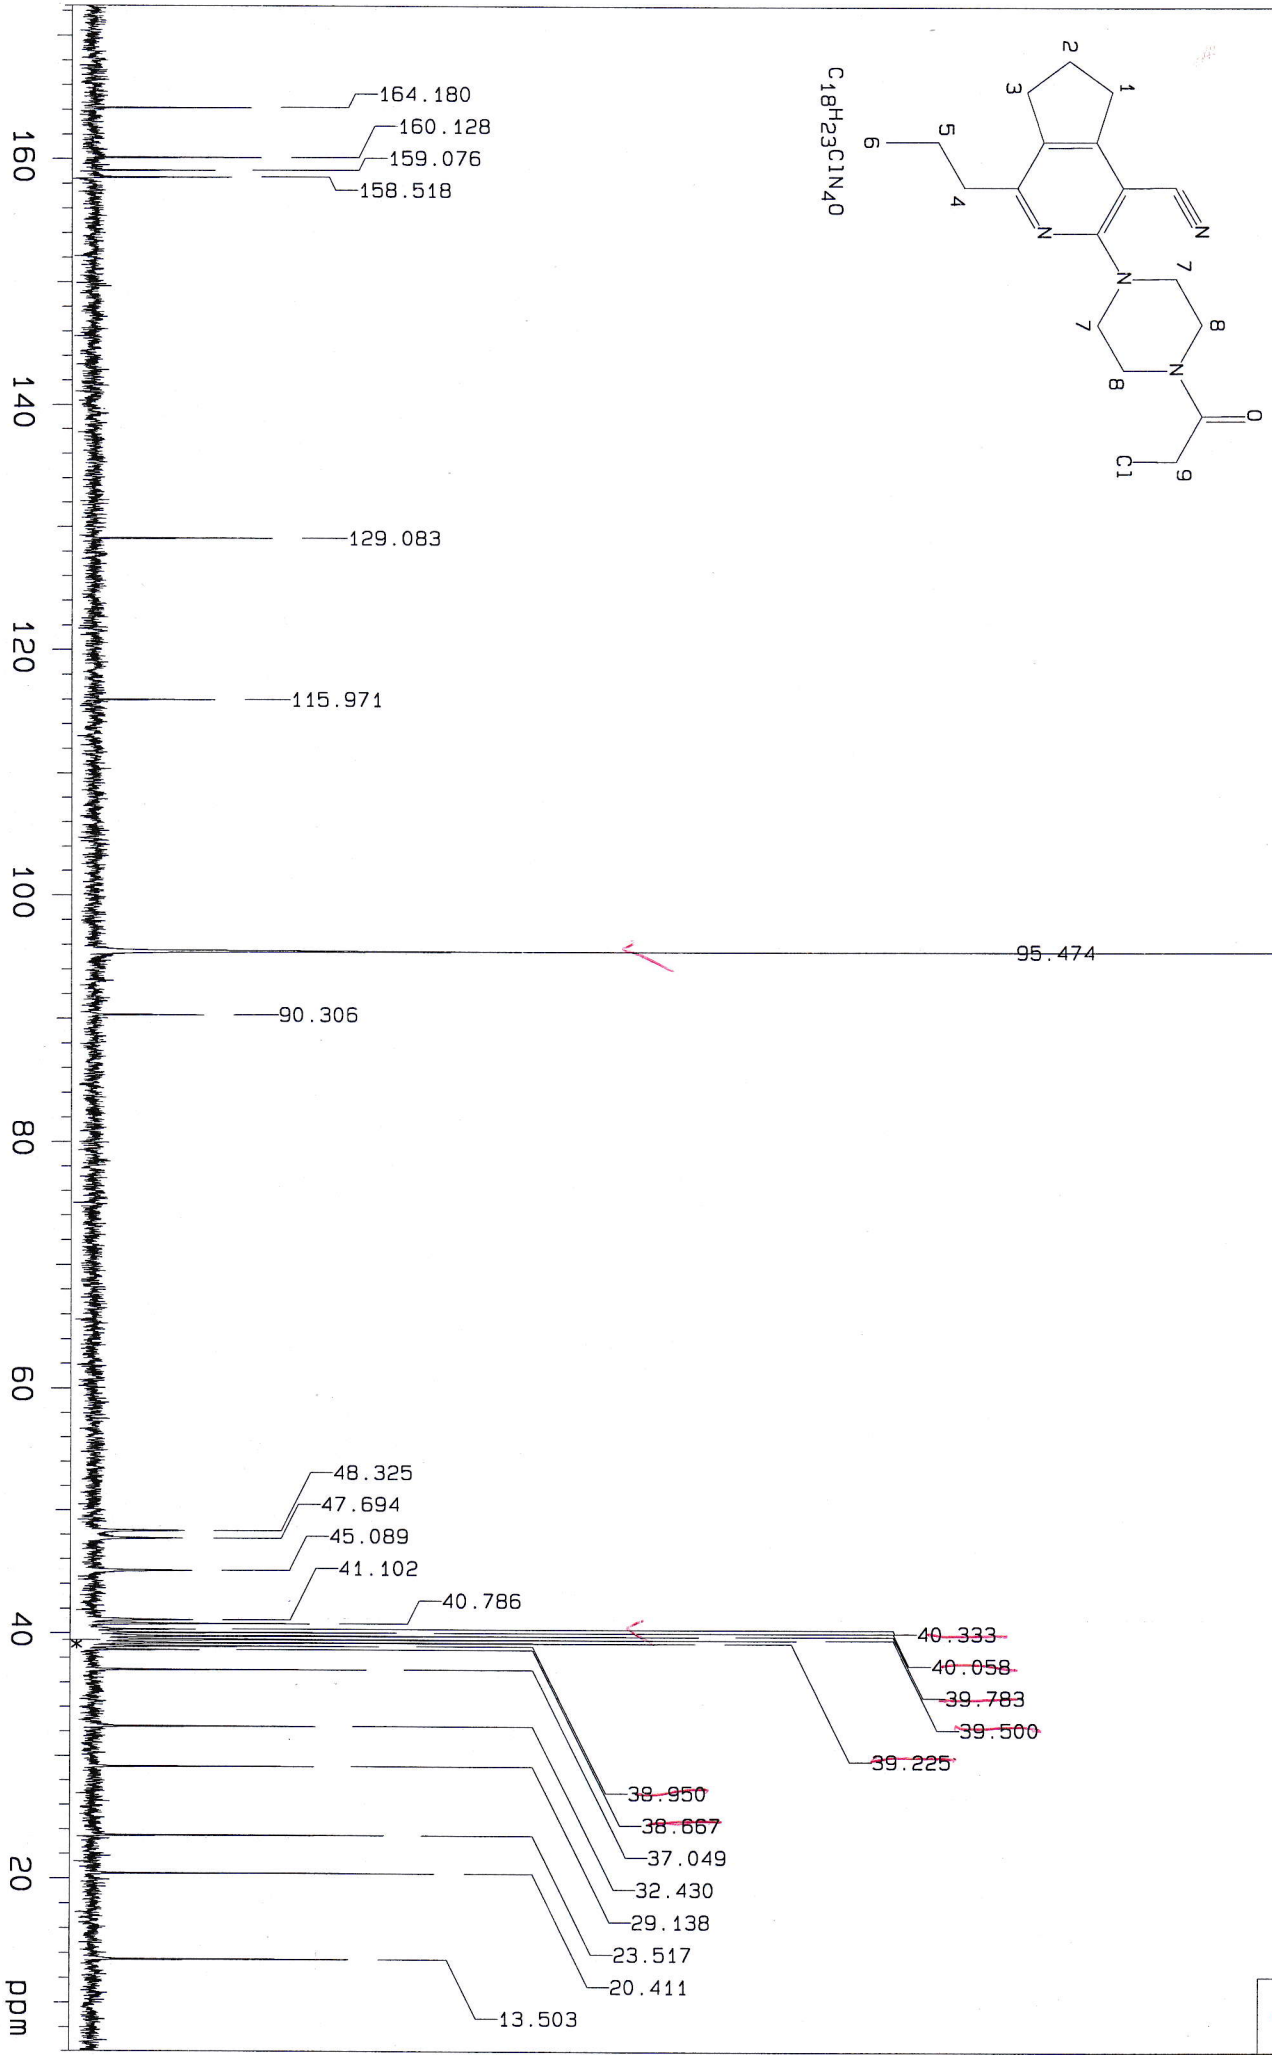

Handwritten signature

S05-019

2c

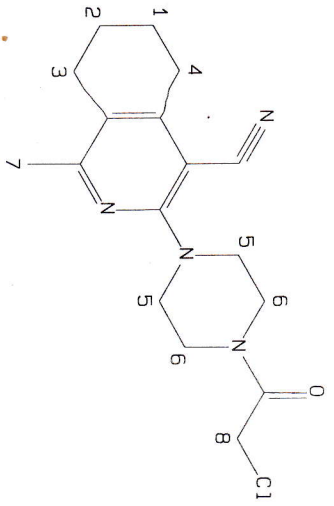

C<sub>17</sub>H<sub>21</sub>CIN<sub>4</sub>O

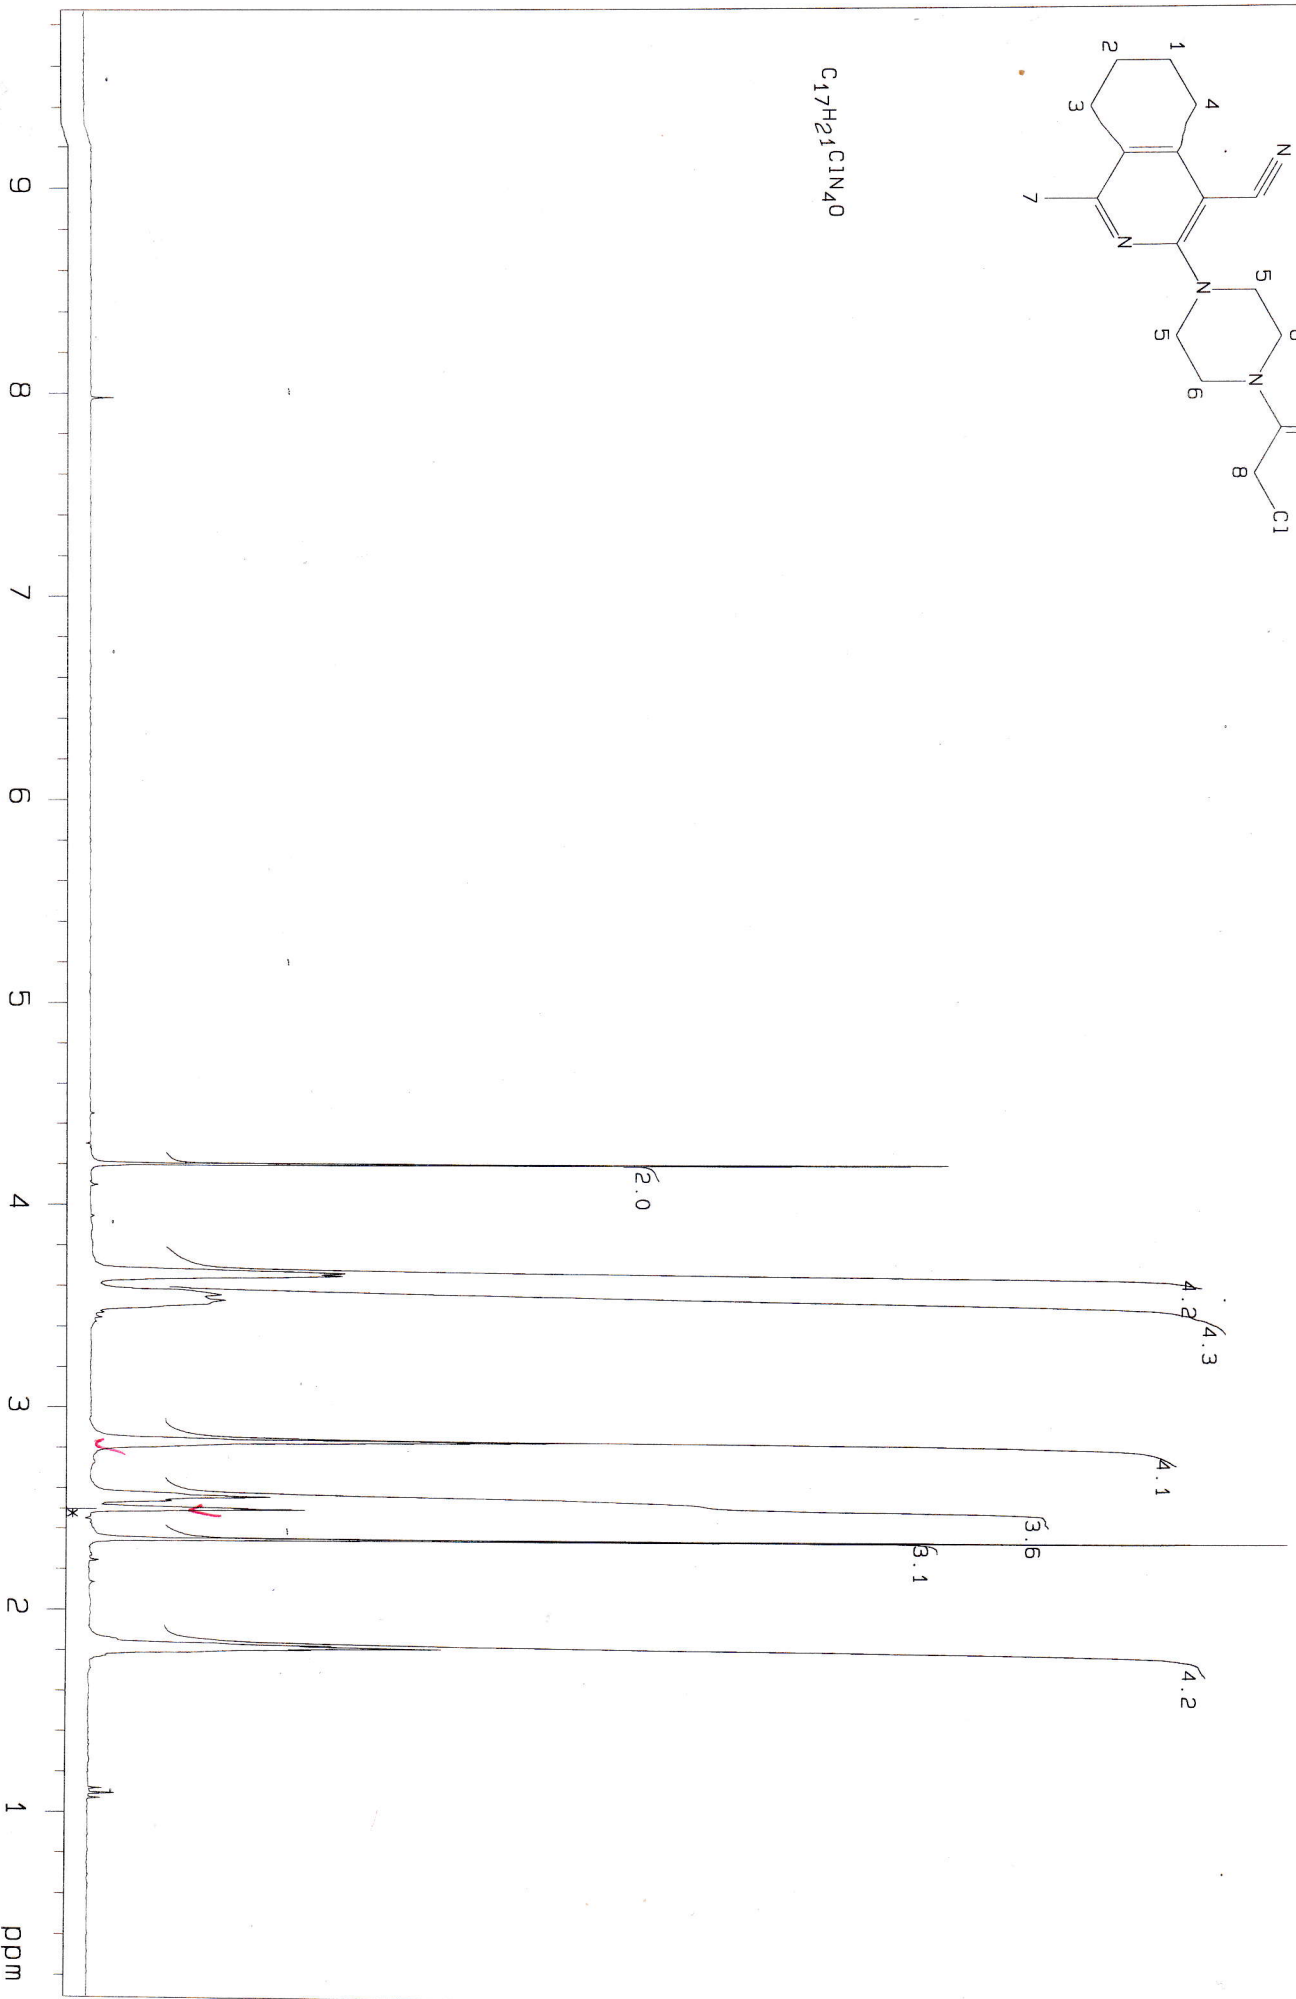

+



T20-180

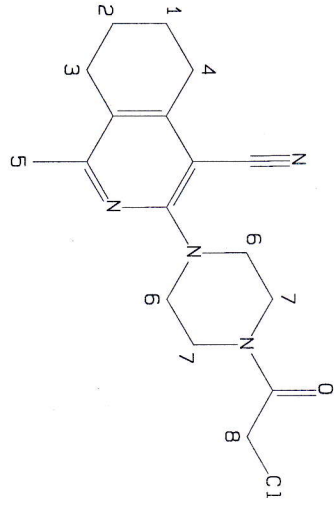

C<sub>17</sub>H<sub>21</sub>N<sub>3</sub>O

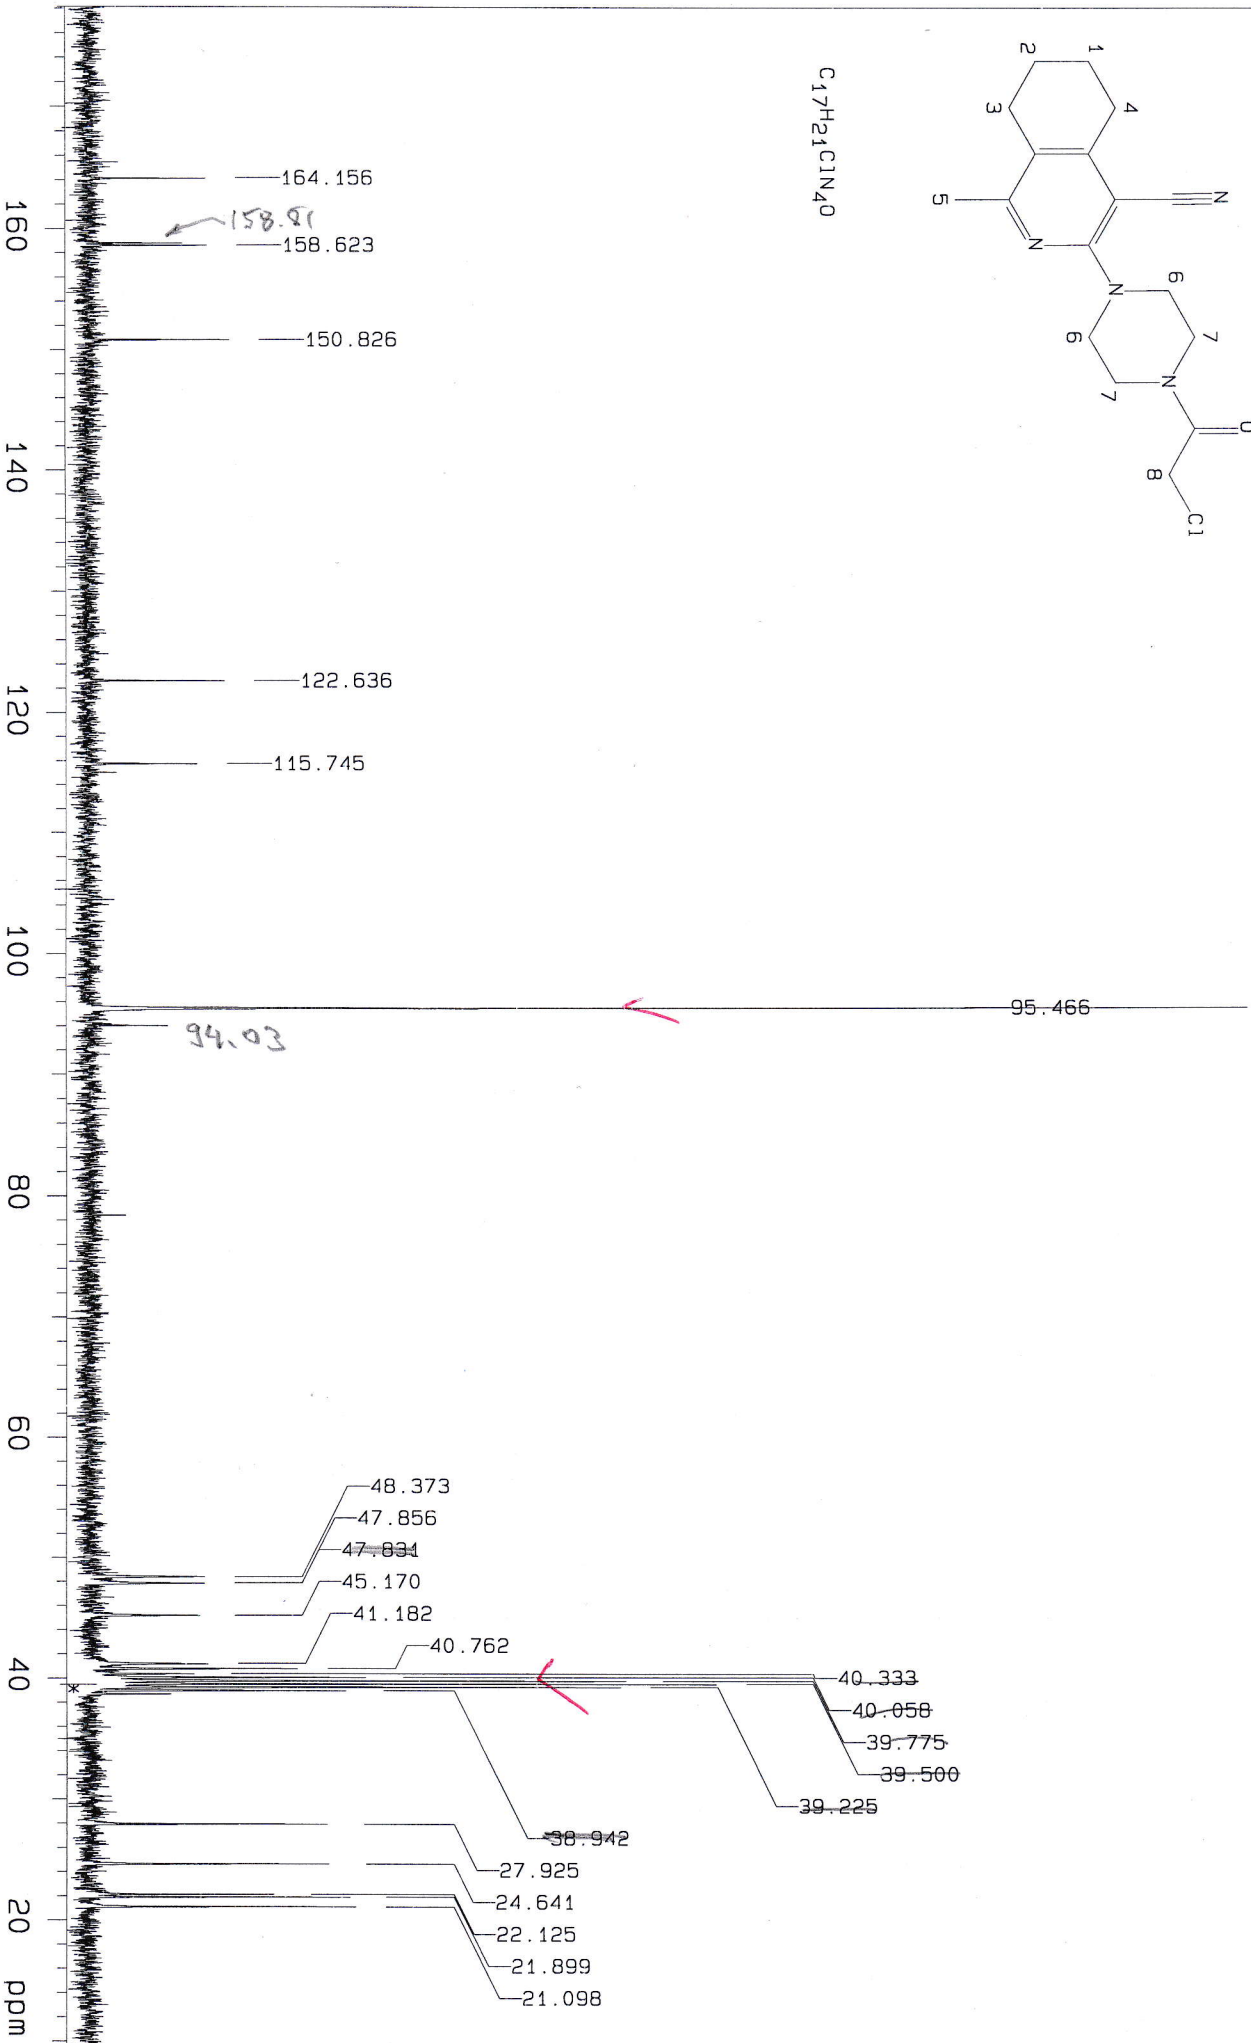

+  
*[Handwritten signature]*

2d

Molecular Structure Research Centre, Yerevan, Armenia, Varian Mercury-300VX  
**HE-574**

H1 300.088 MHz, nt = 16, np = 32000, temp = 30.0 C, lb = -0.2, solvent = DMSO/C14 1/3

ANUSH\_TEMA he-574

Mar 15 2021

*Handwritten signature*

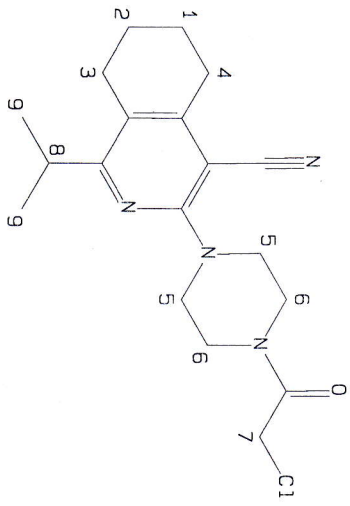

C<sub>19</sub>H<sub>25</sub>CIN<sub>4</sub>O

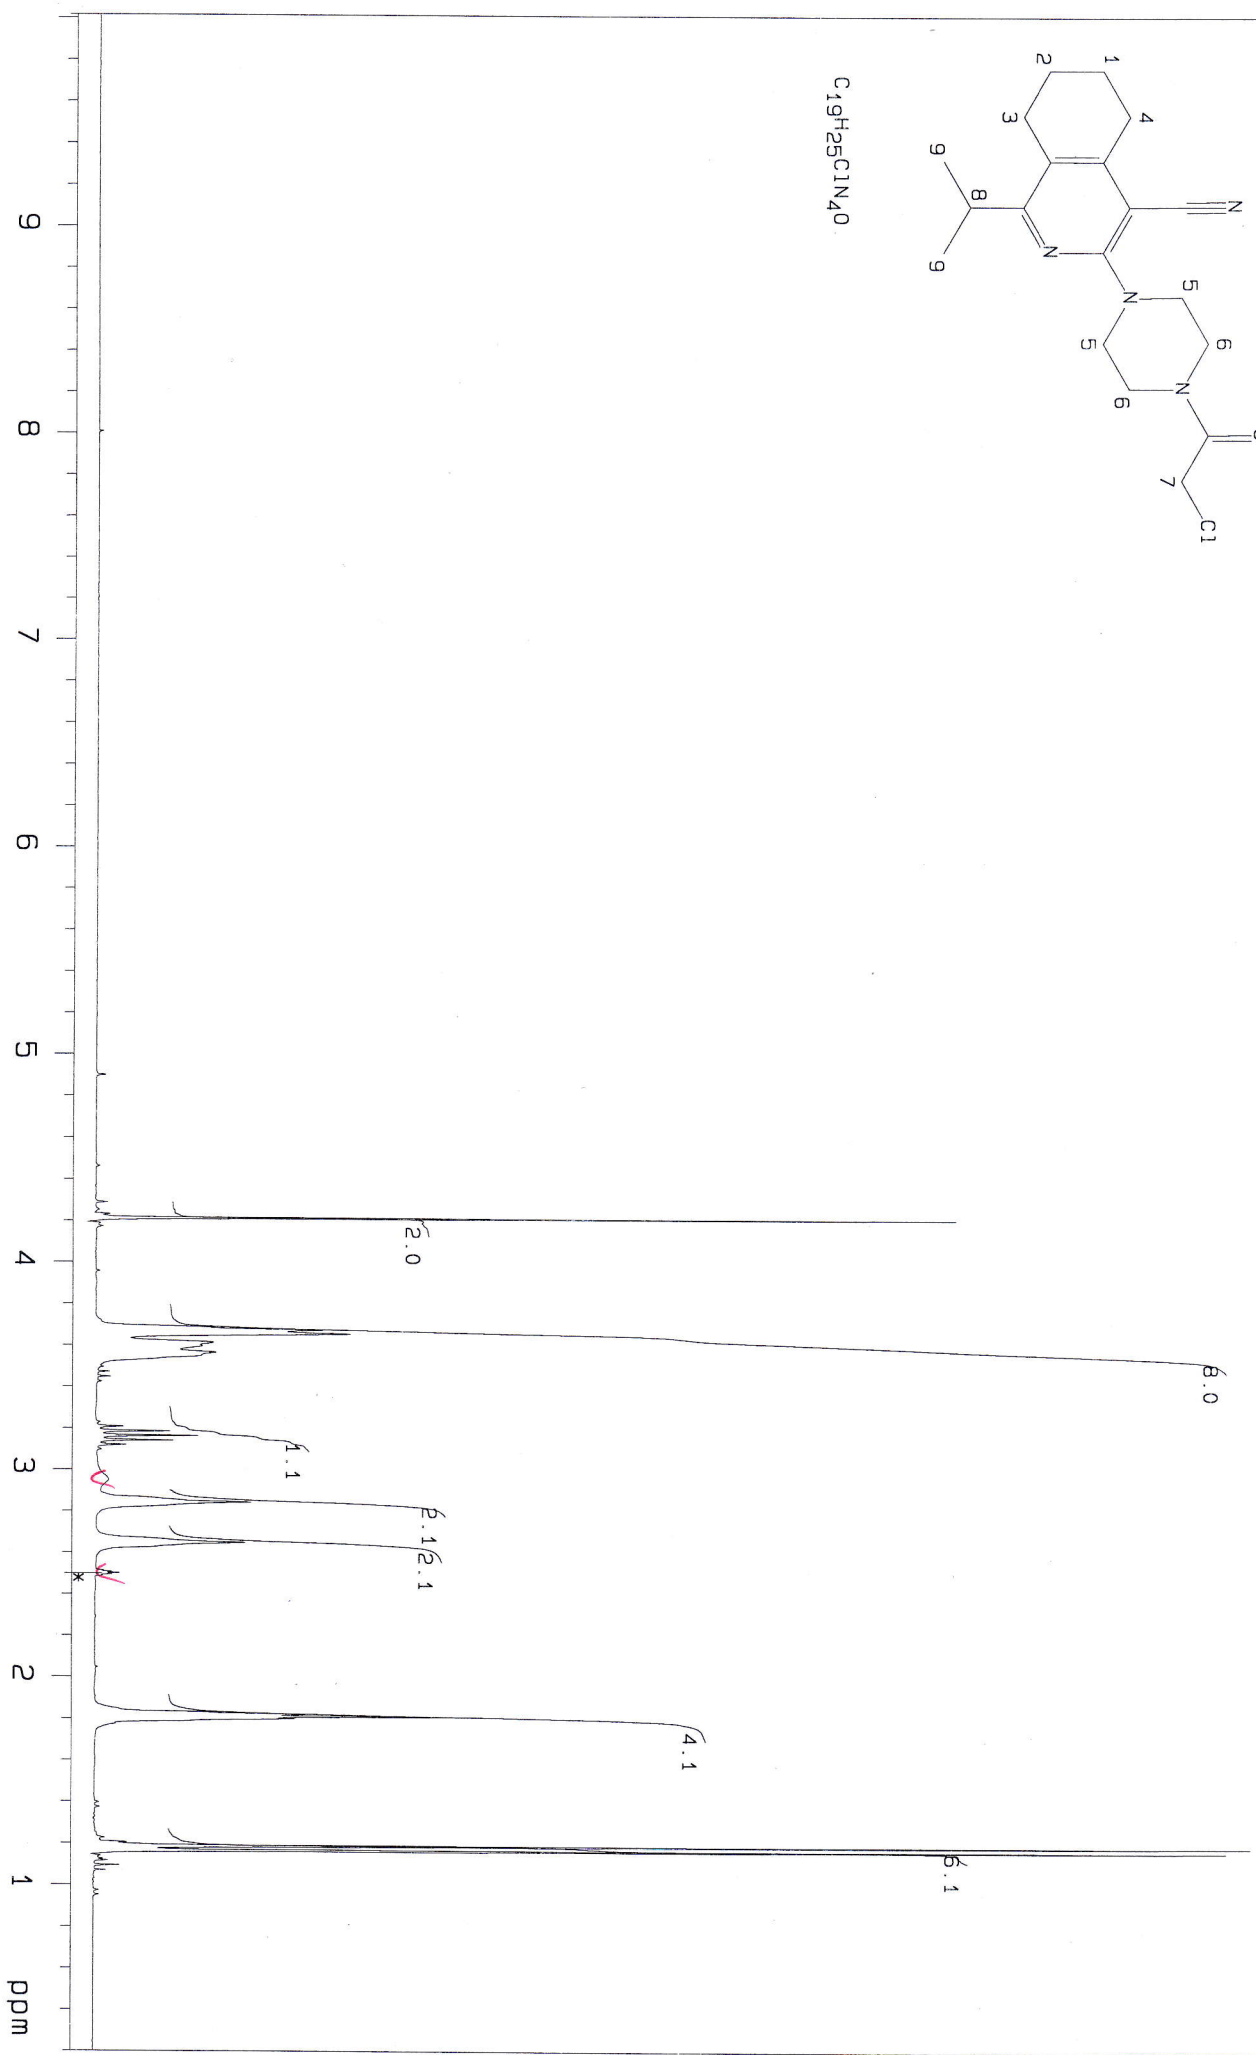

28

Molecular Structure Research Centre, Yerevan, Armenia, Varian Mercury-300VX  
**HE-574**

C13 75.465 MHz, nt = 384, np = 13998, temp = 30.0 C, lb = 1.0, solvent = DMSO/CD4 1/3

ANUSH\_TEMA he-574

Mar 15 2021

+  
[Signature]

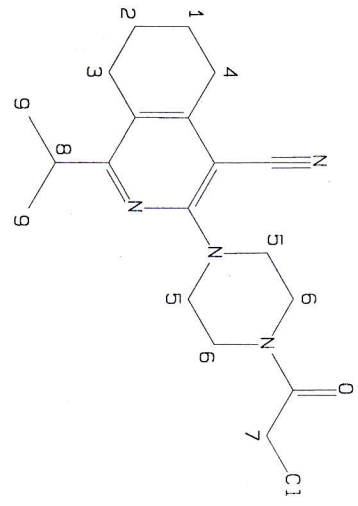

C<sub>19</sub>H<sub>25</sub>CIN<sub>4</sub>O

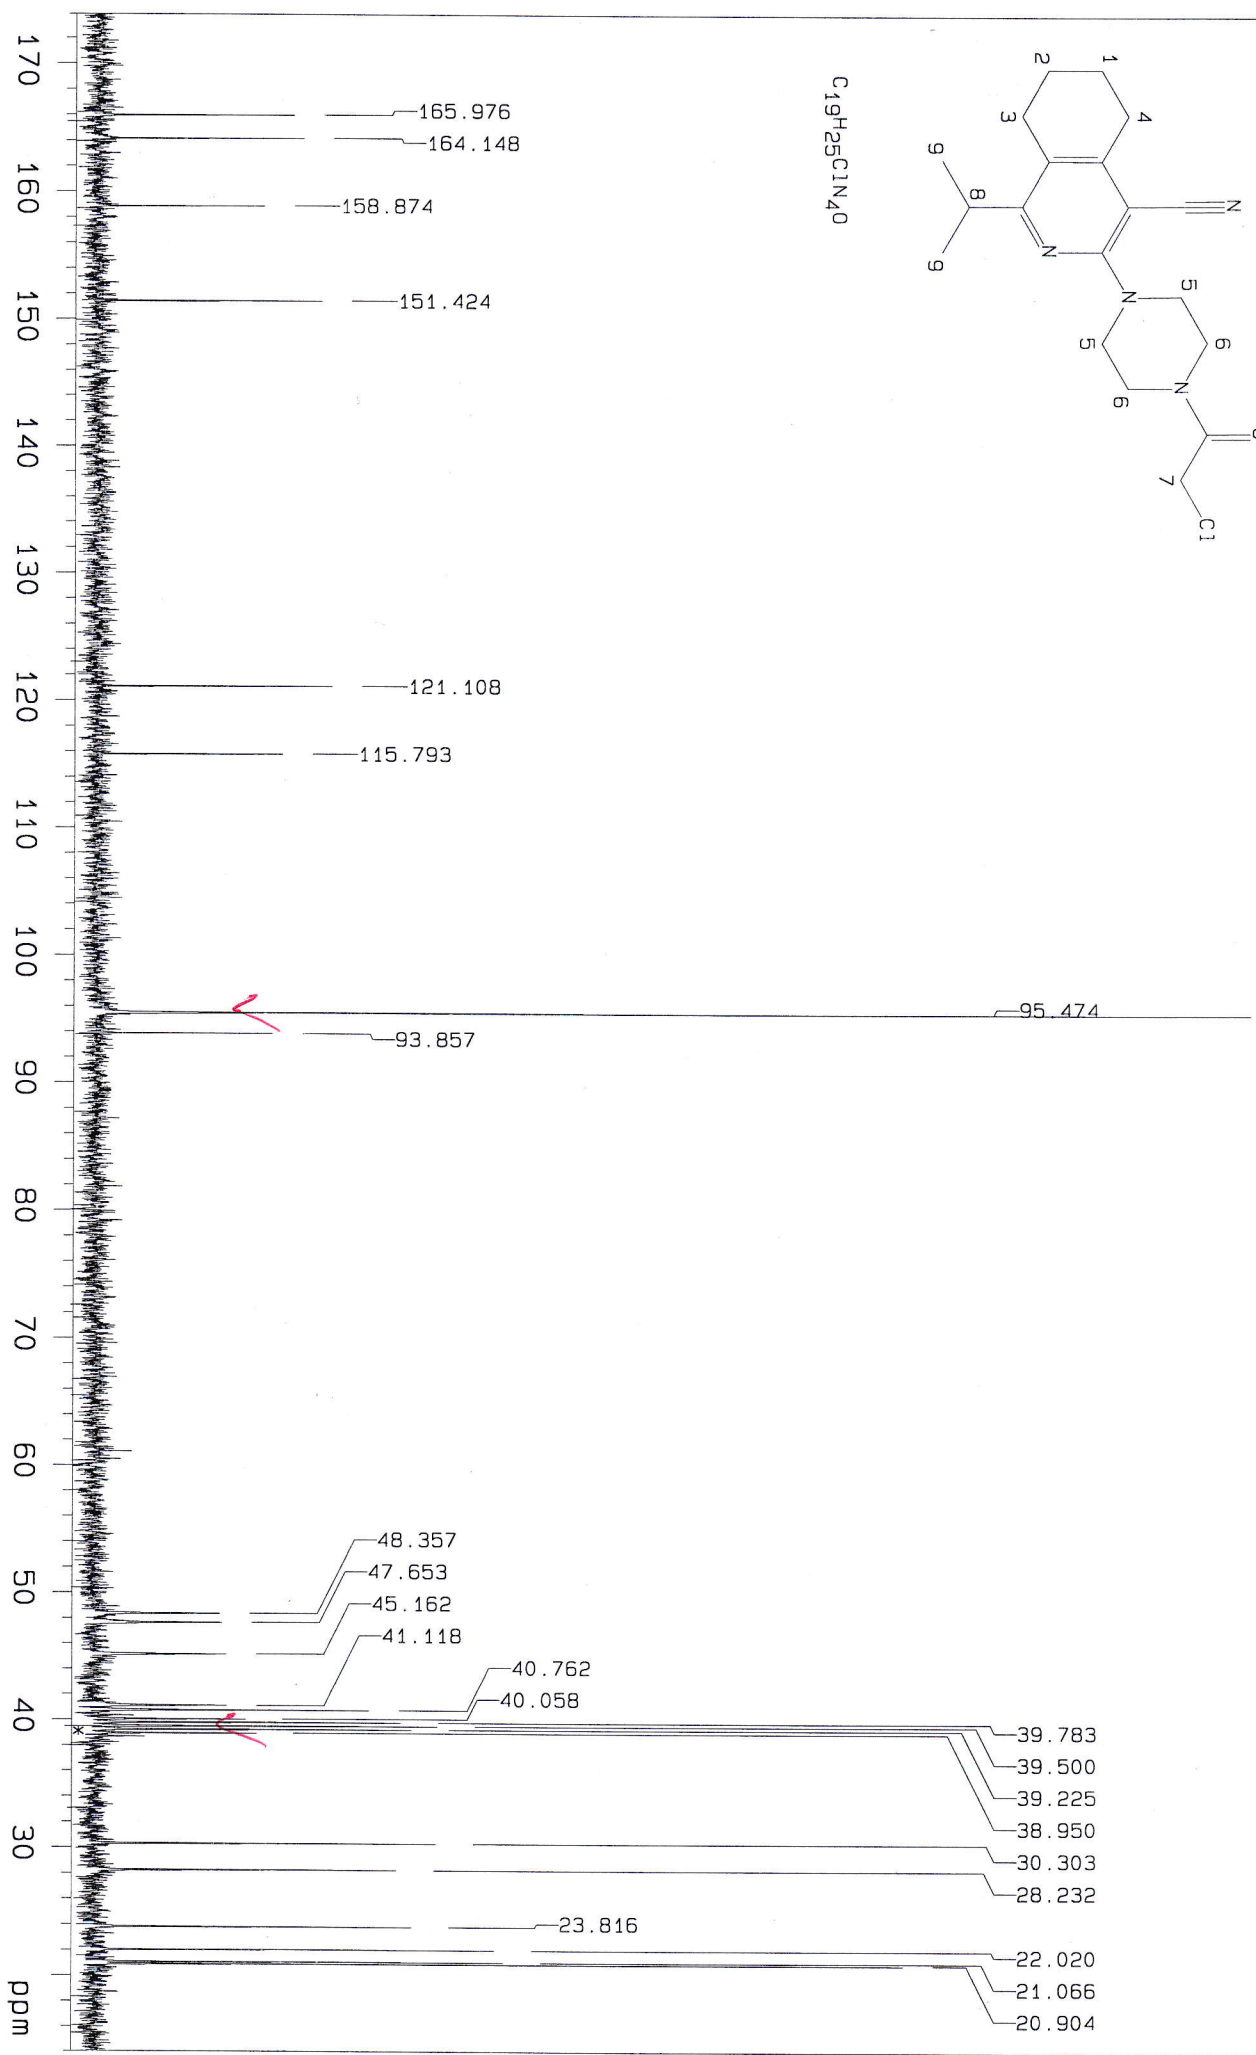

2e

Molecular Structure Research Centre, Yerevan, Armenia, Varian Mercury-300YX  
HE-468

H1 300.088 MHz, nt = 16, npt = 32000, temp = 30.0 C, lb = -0.2, solvent = DMSO-CG14 1/3  
NOCI\_19 h = 468

Jun 6 2019

+

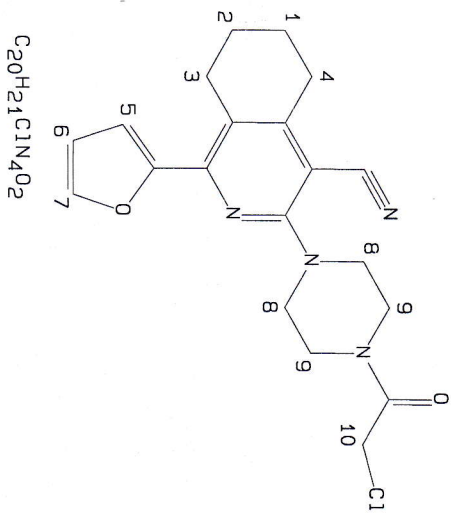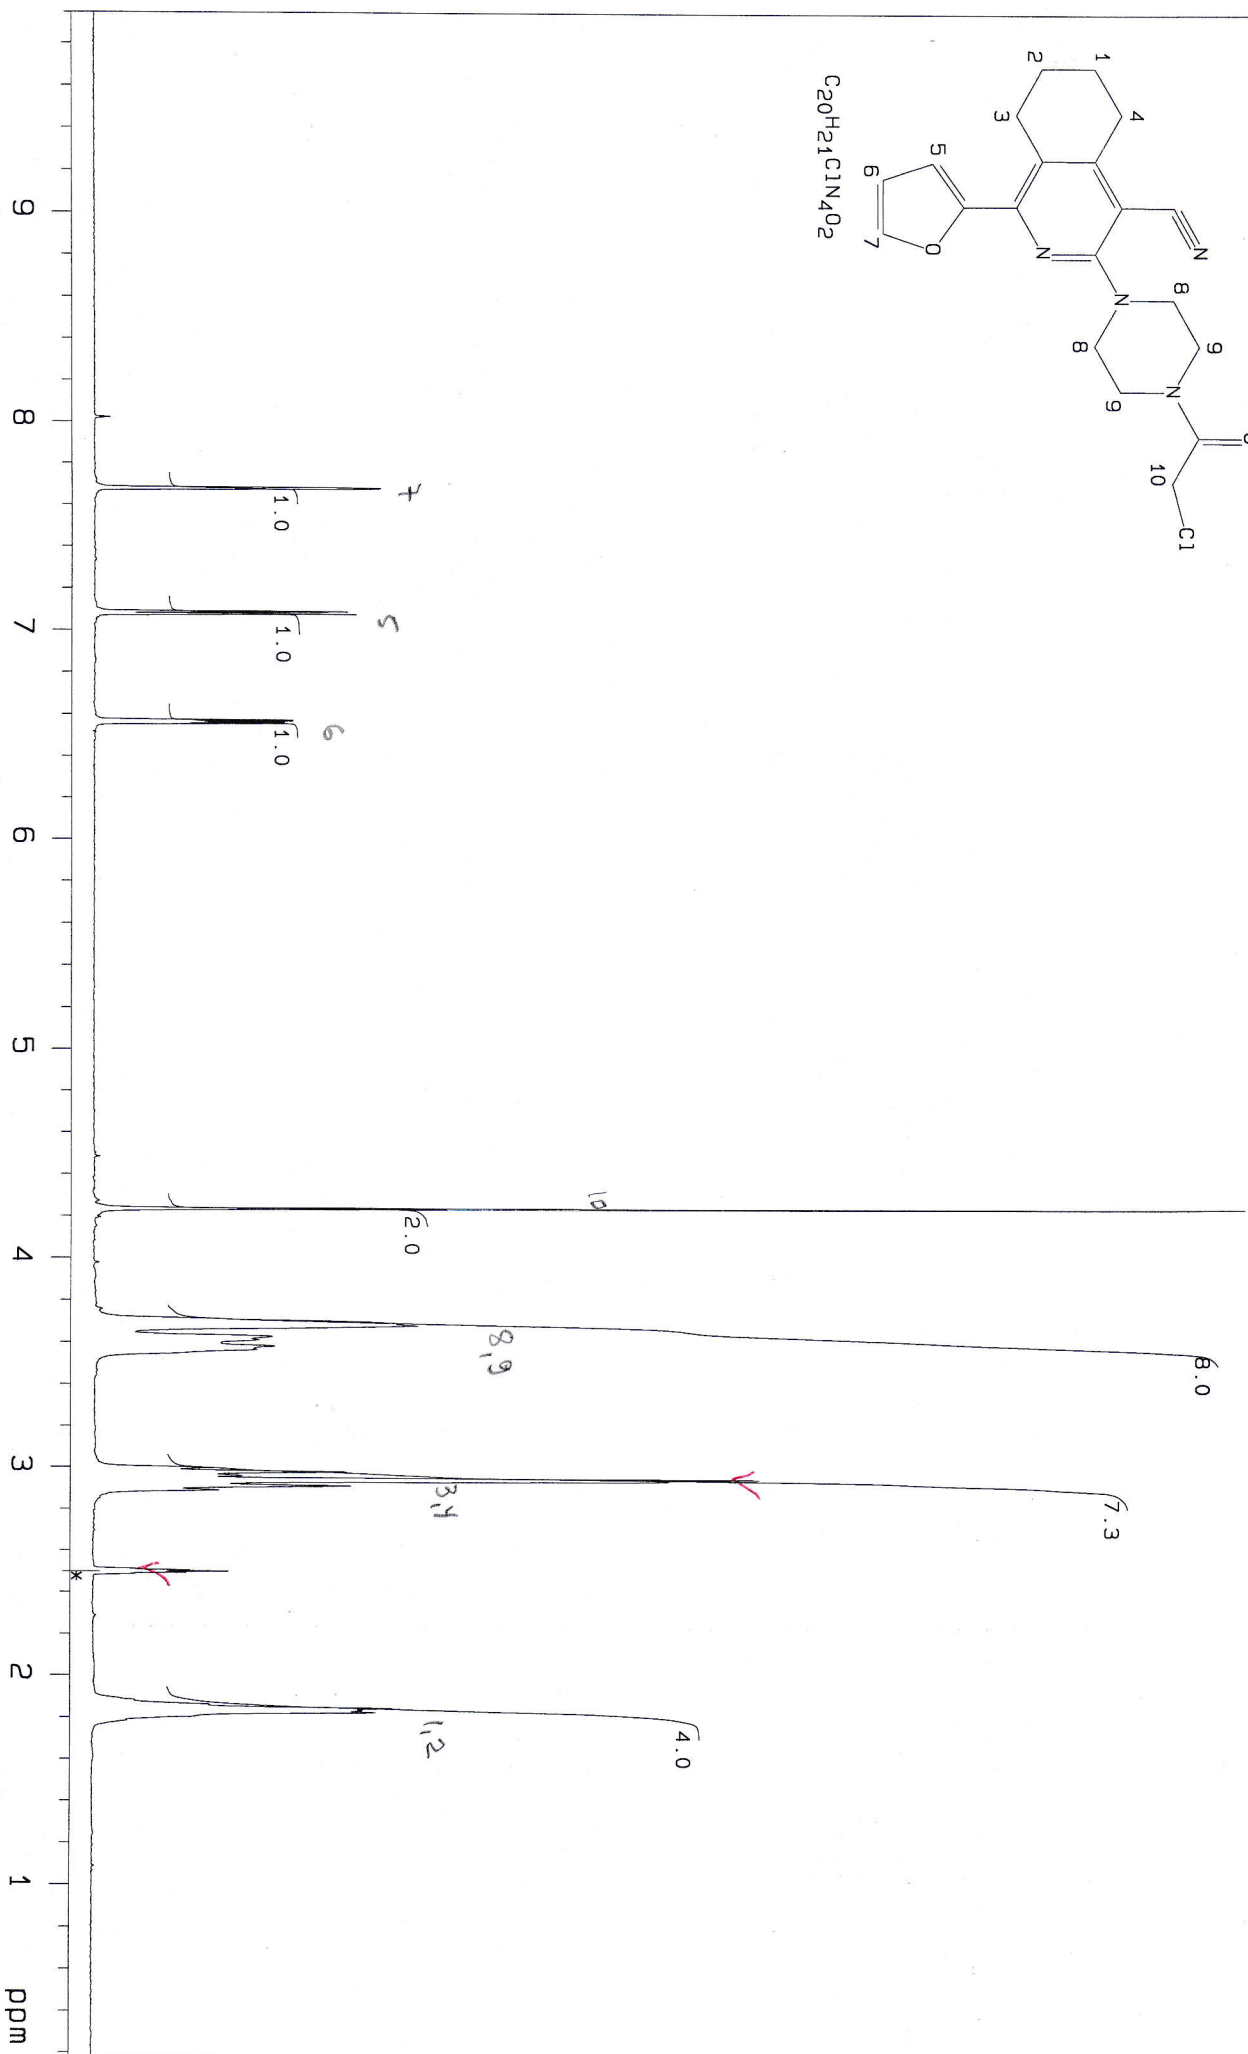

*Phases*

20

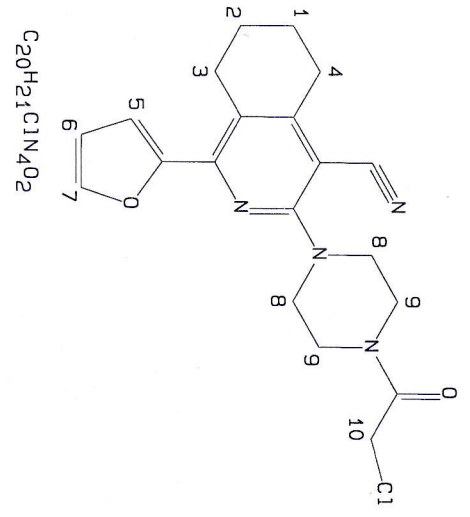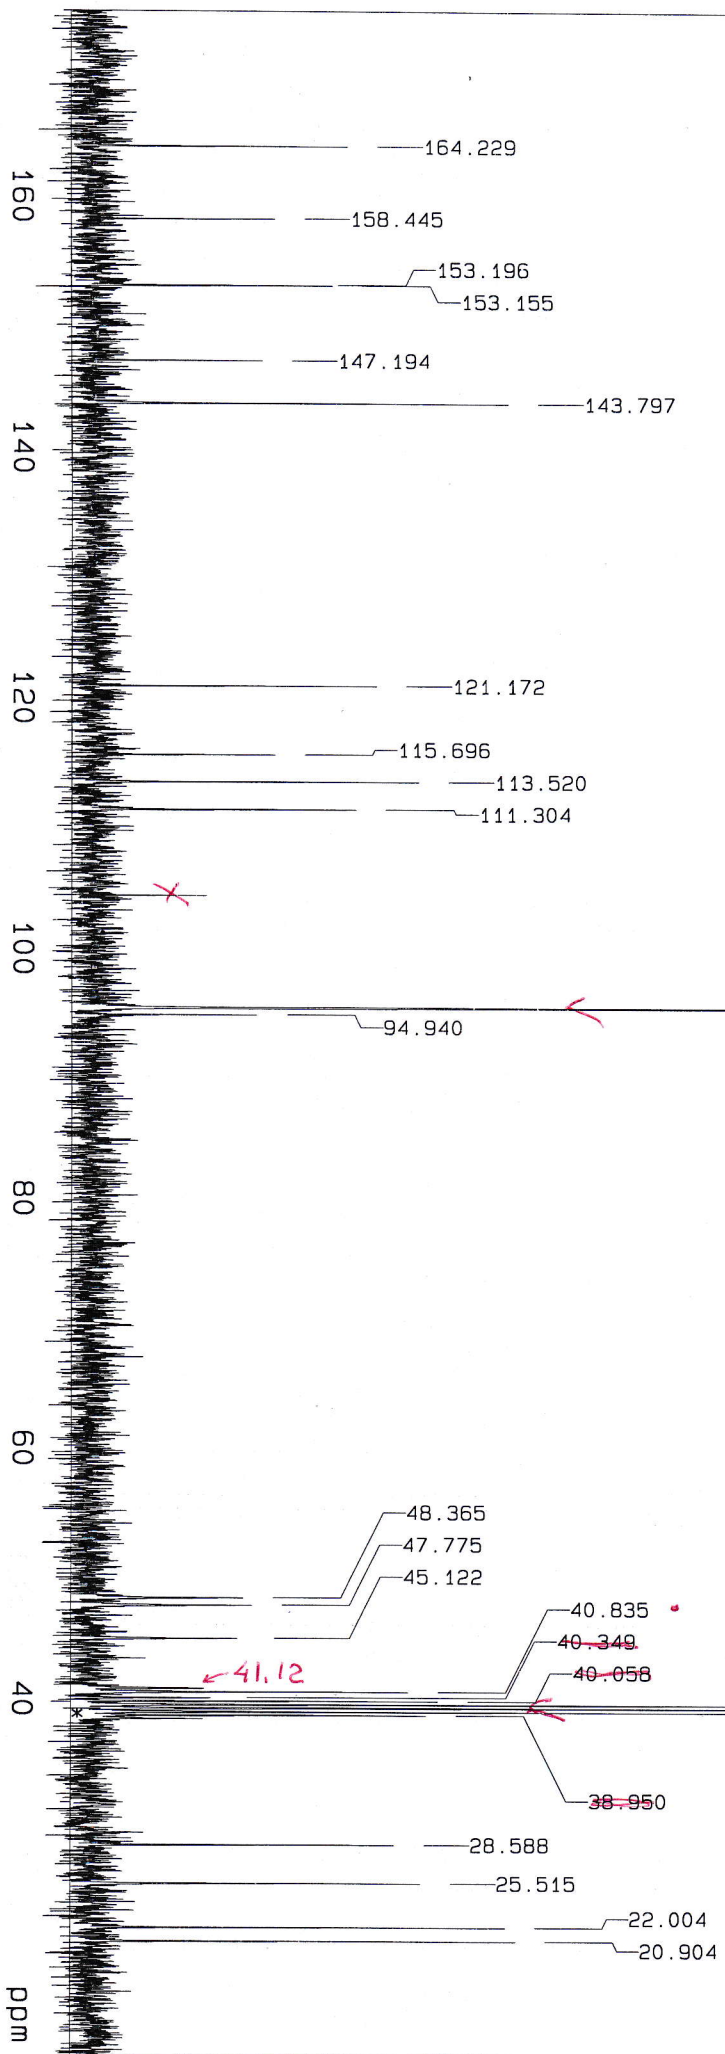

+

300

Molecular Structure Research Centre, Yerevan, Armenia, Varian Mercury-300VX  
HA-1045

H1 300.088 MHz, nt = 16, np = 32000, temp = 30.0 C, lb = -0.2, solvent = DMSO/Cd4 1/3  
SAMV\_19 ha-1045

May 23 2019

+

*Handwritten signature*

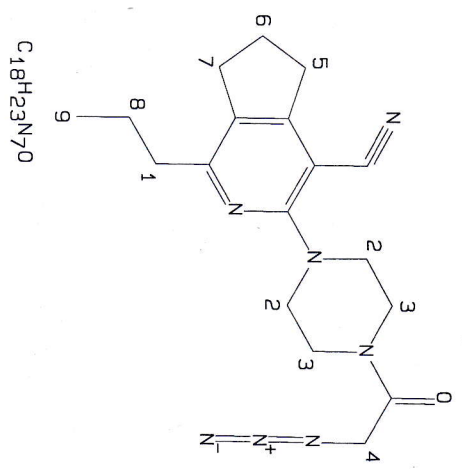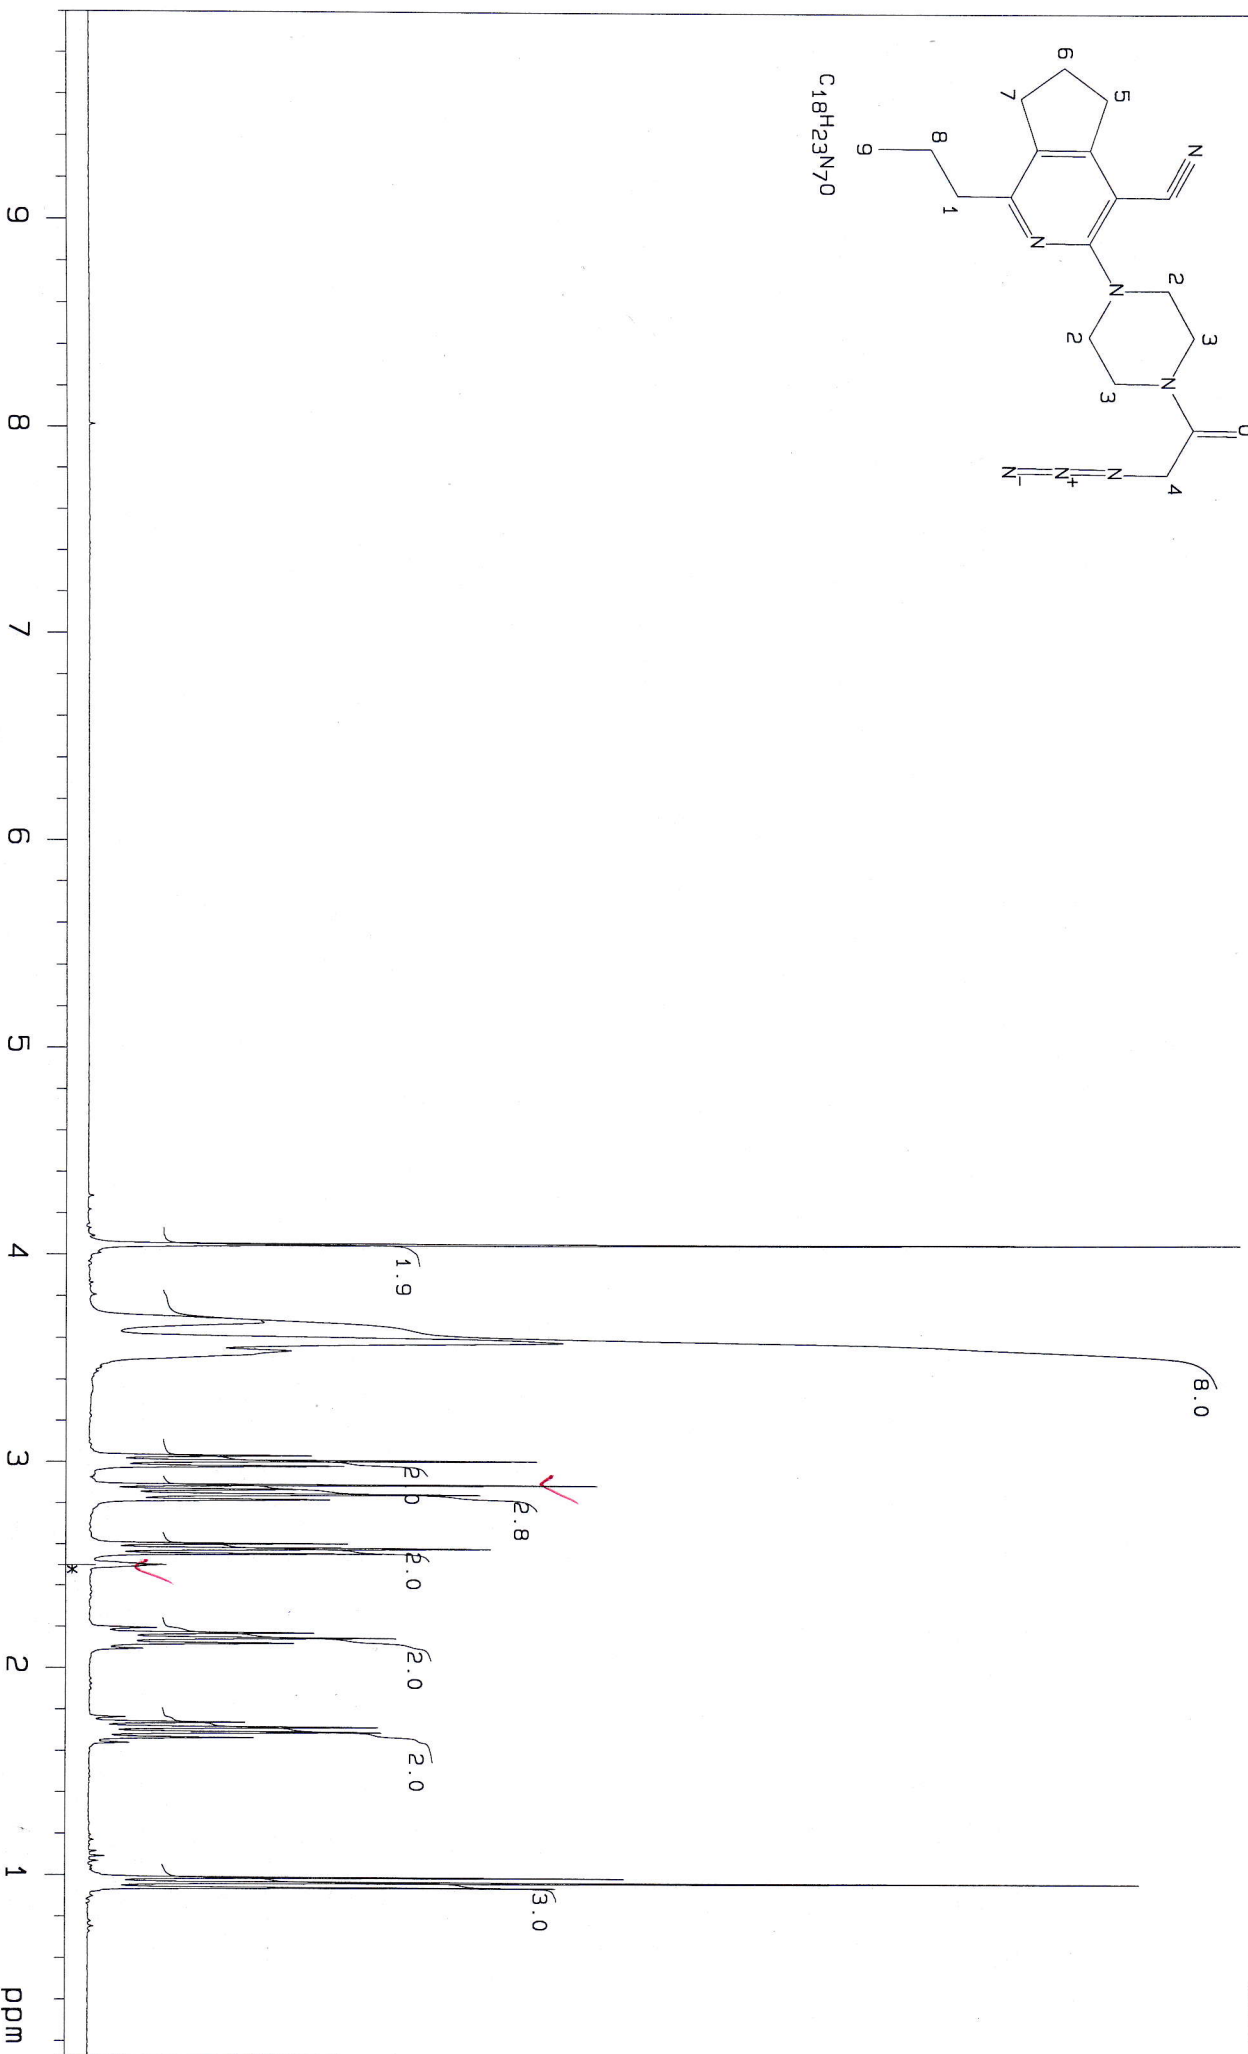



3a

Molecular Structure Research Centre, Yerevan, Armenia, Varian Mercury-300VX  
**HA-1045**

C13 75.465 MHz, nt = 256, np = 19998, temp = 30.0 C, lb = 1.0, solvent = DMSO-C14 1/3

SAMV\_19 ha-1045

May 23 2019

+ *[Signature]*

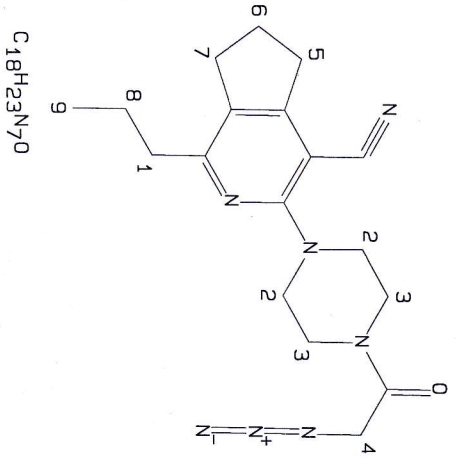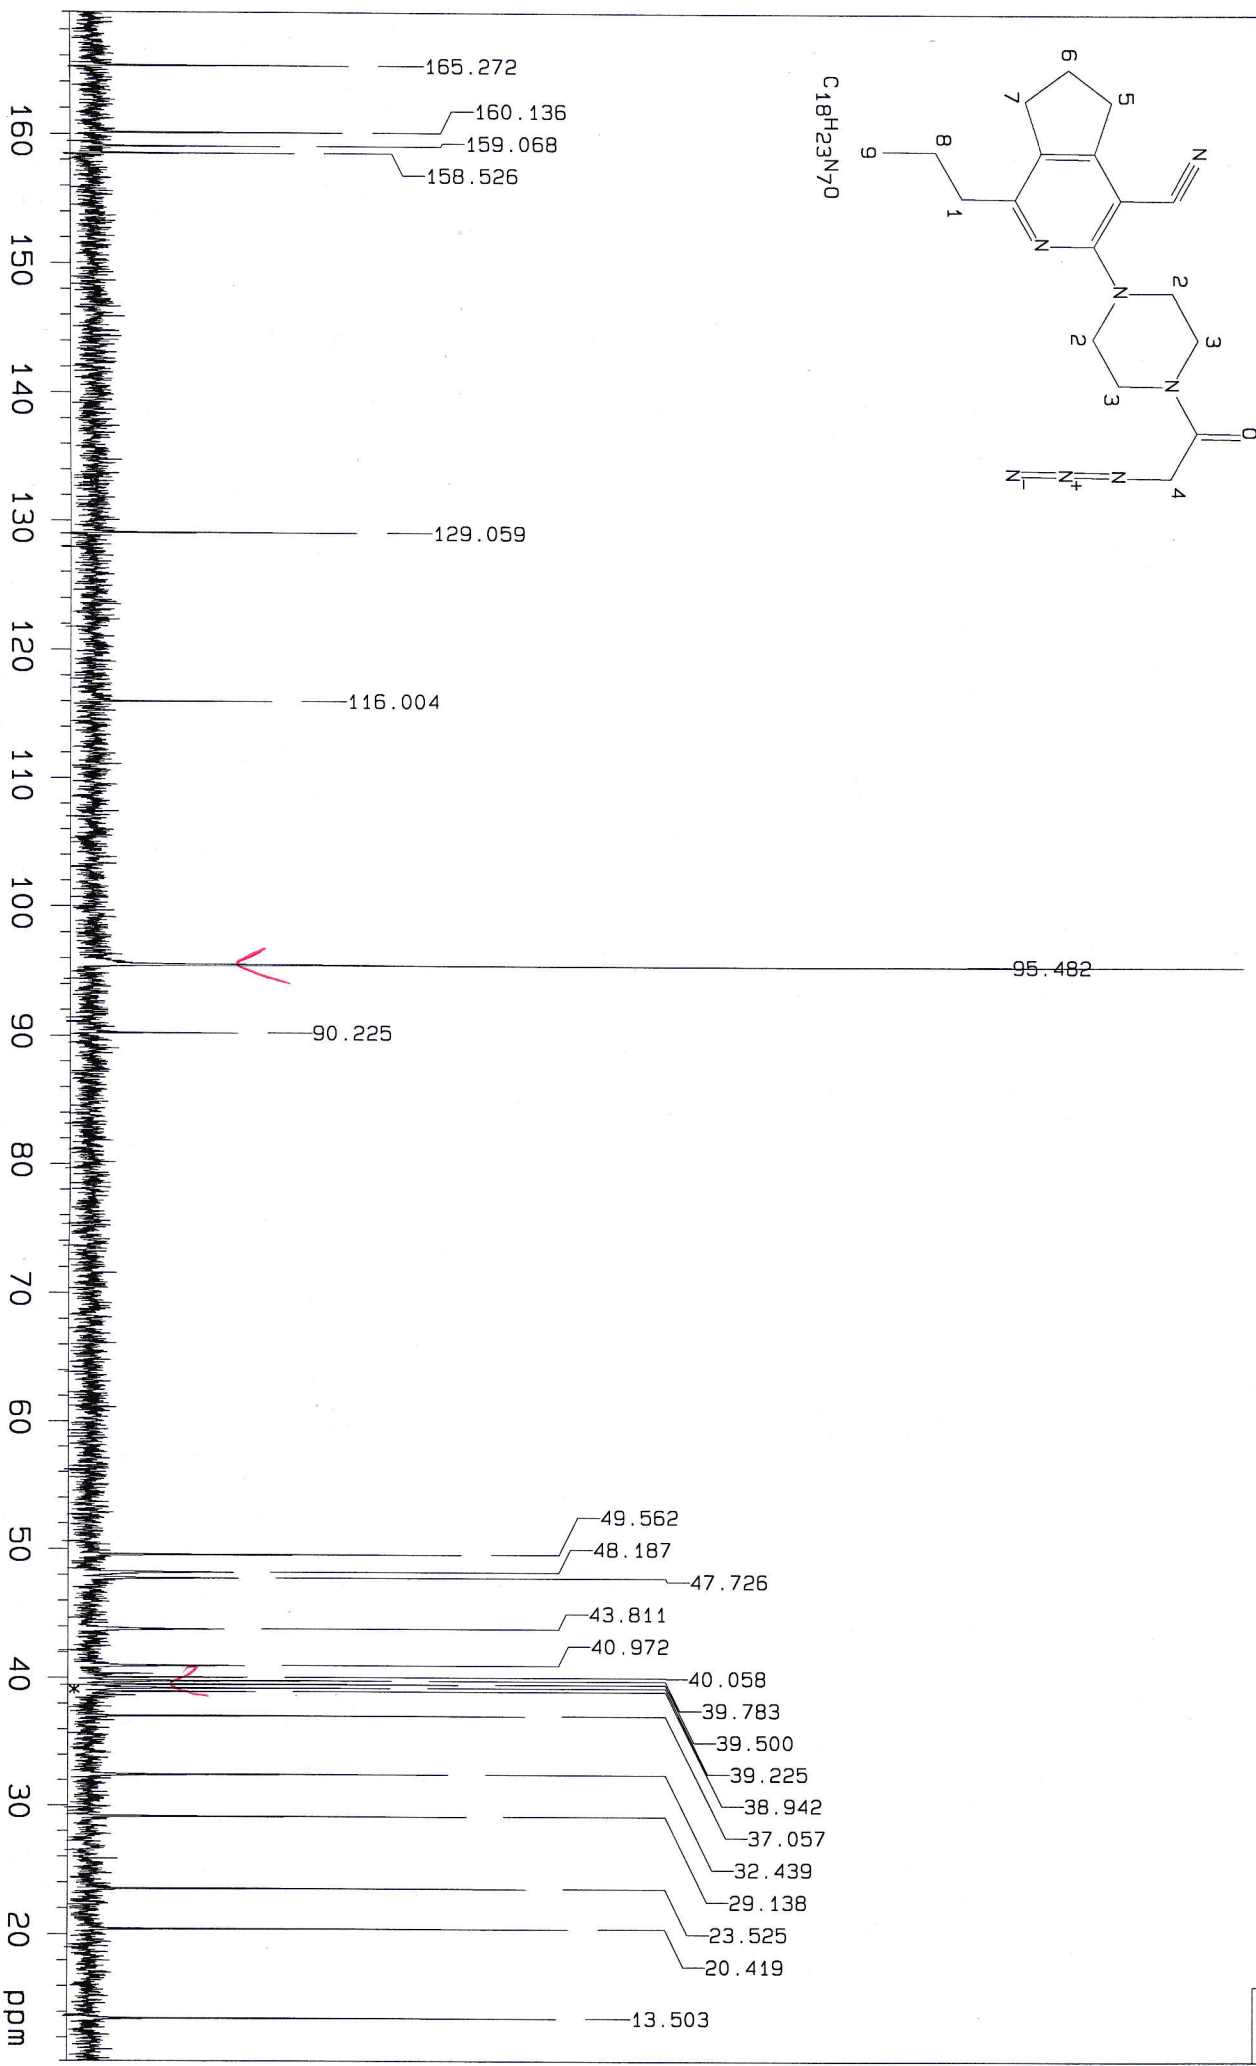



3c

T20-181

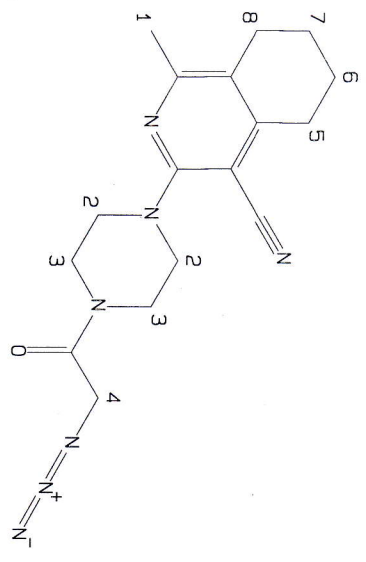

C<sub>17</sub>H<sub>21</sub>N<sub>7</sub>O

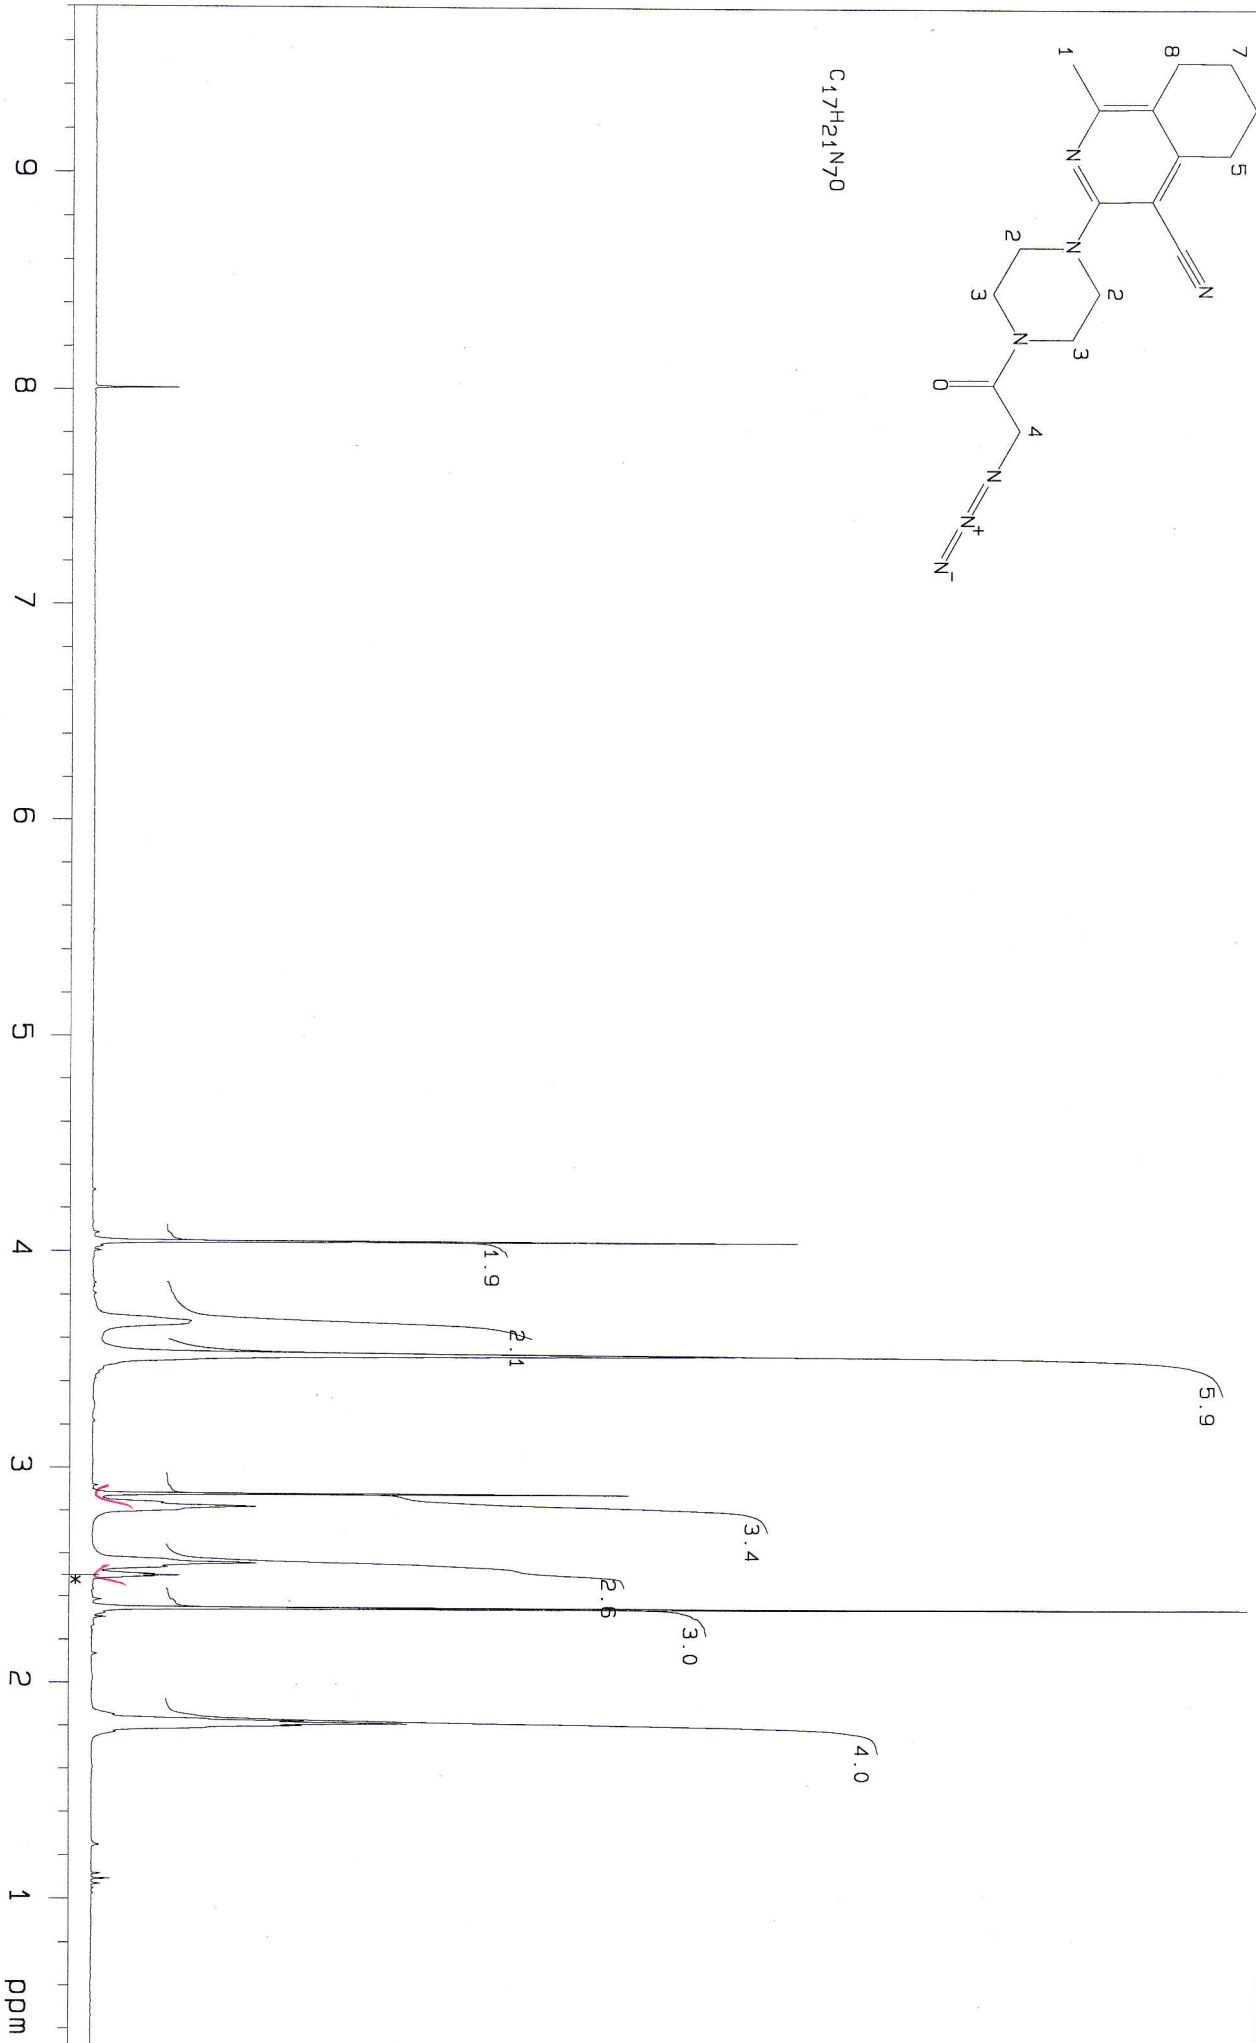

+ Conf

3c

T20-181

C13 75.465 MHz, nt = 336, np = 19998, temp = 30.0 C, lb = 1.0, solvent = DMSO/Cd4 1/3

ANUSH\_TEMA t20-181

Mar 24 2022

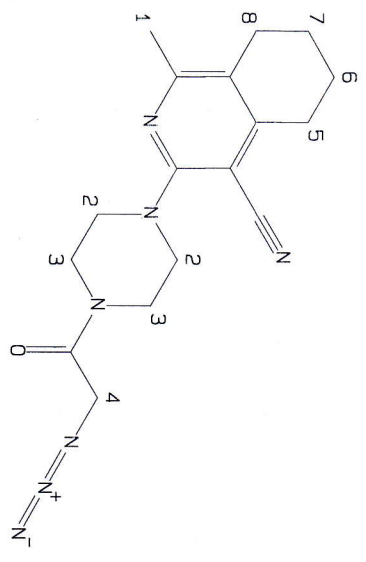

C<sub>17</sub>H<sub>21</sub>N<sub>7</sub>O

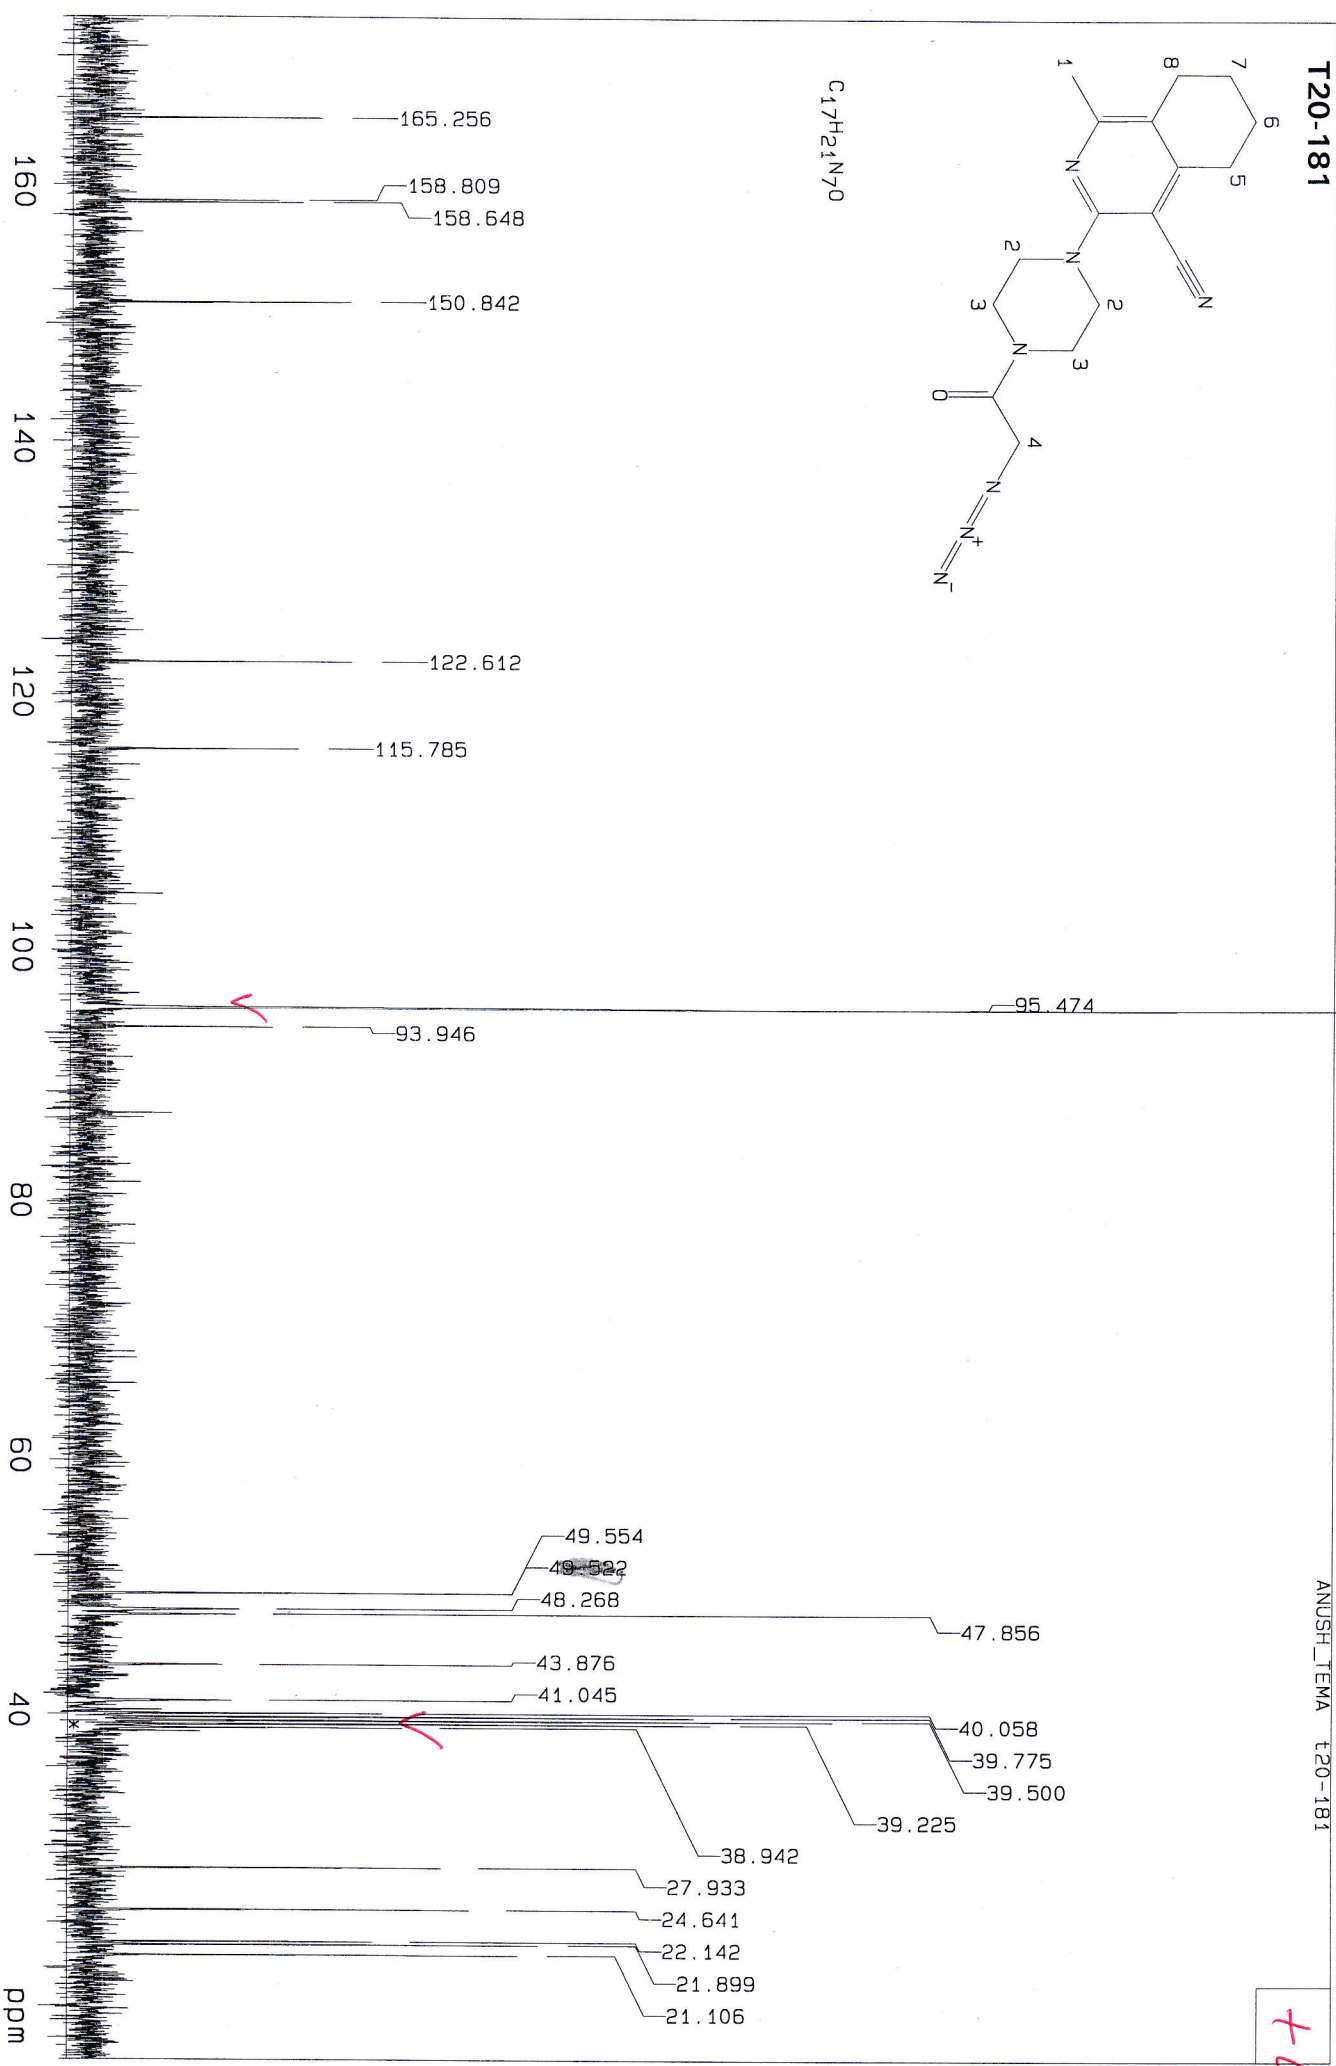

+ [Signature]

3d

Molecular Structure Research Centre, Yerevan, Armenia, Varian Mercury-300VX

H1 300.088 MHz, nt = 16, np = 32000, temp = 30.0 C, lb = -0.2, solvent = DMSO/CDCl4 1/3

T20-051

ANUSH\_TEMVA f20-051

Mar 22 2021

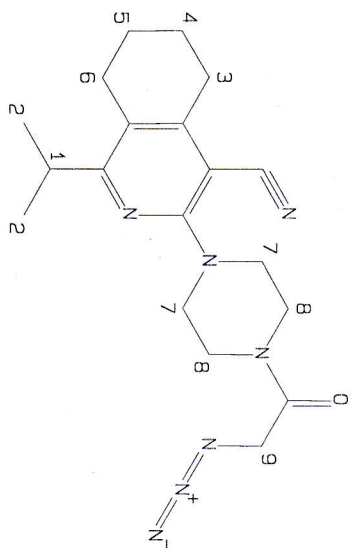

C<sub>19</sub>H<sub>25</sub>N<sub>7</sub>O

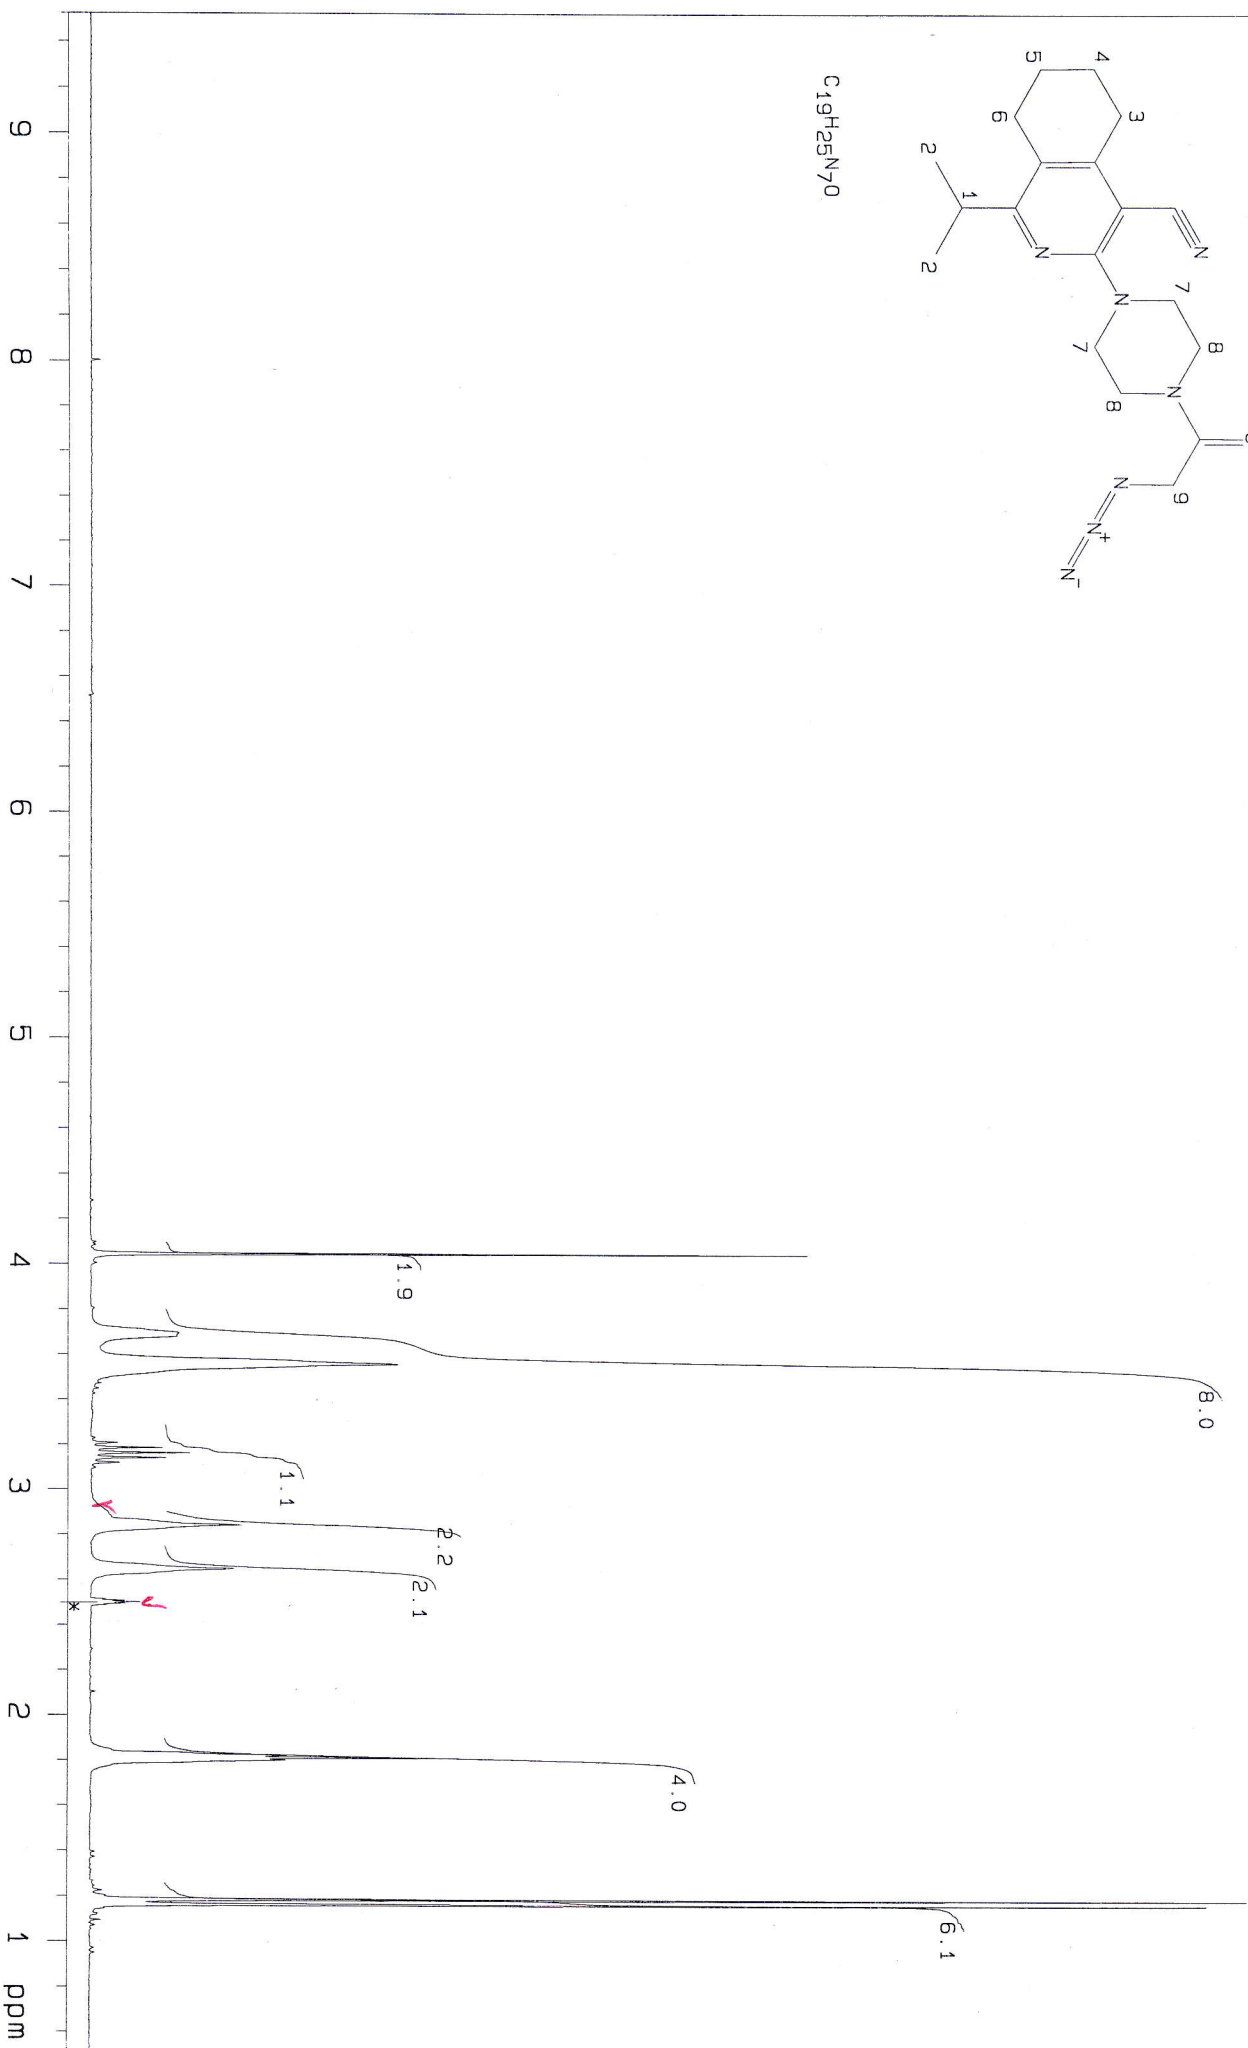

*Handwritten signature*

3d

T20-051

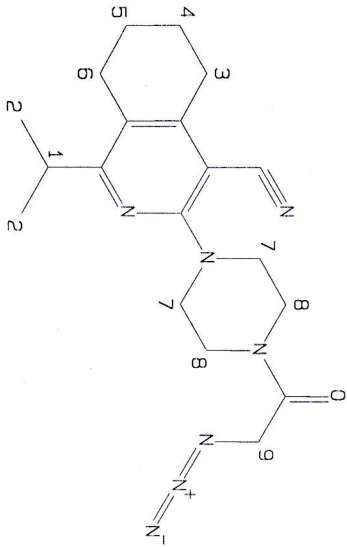

C<sub>19</sub>H<sub>25</sub>N<sub>7</sub>O

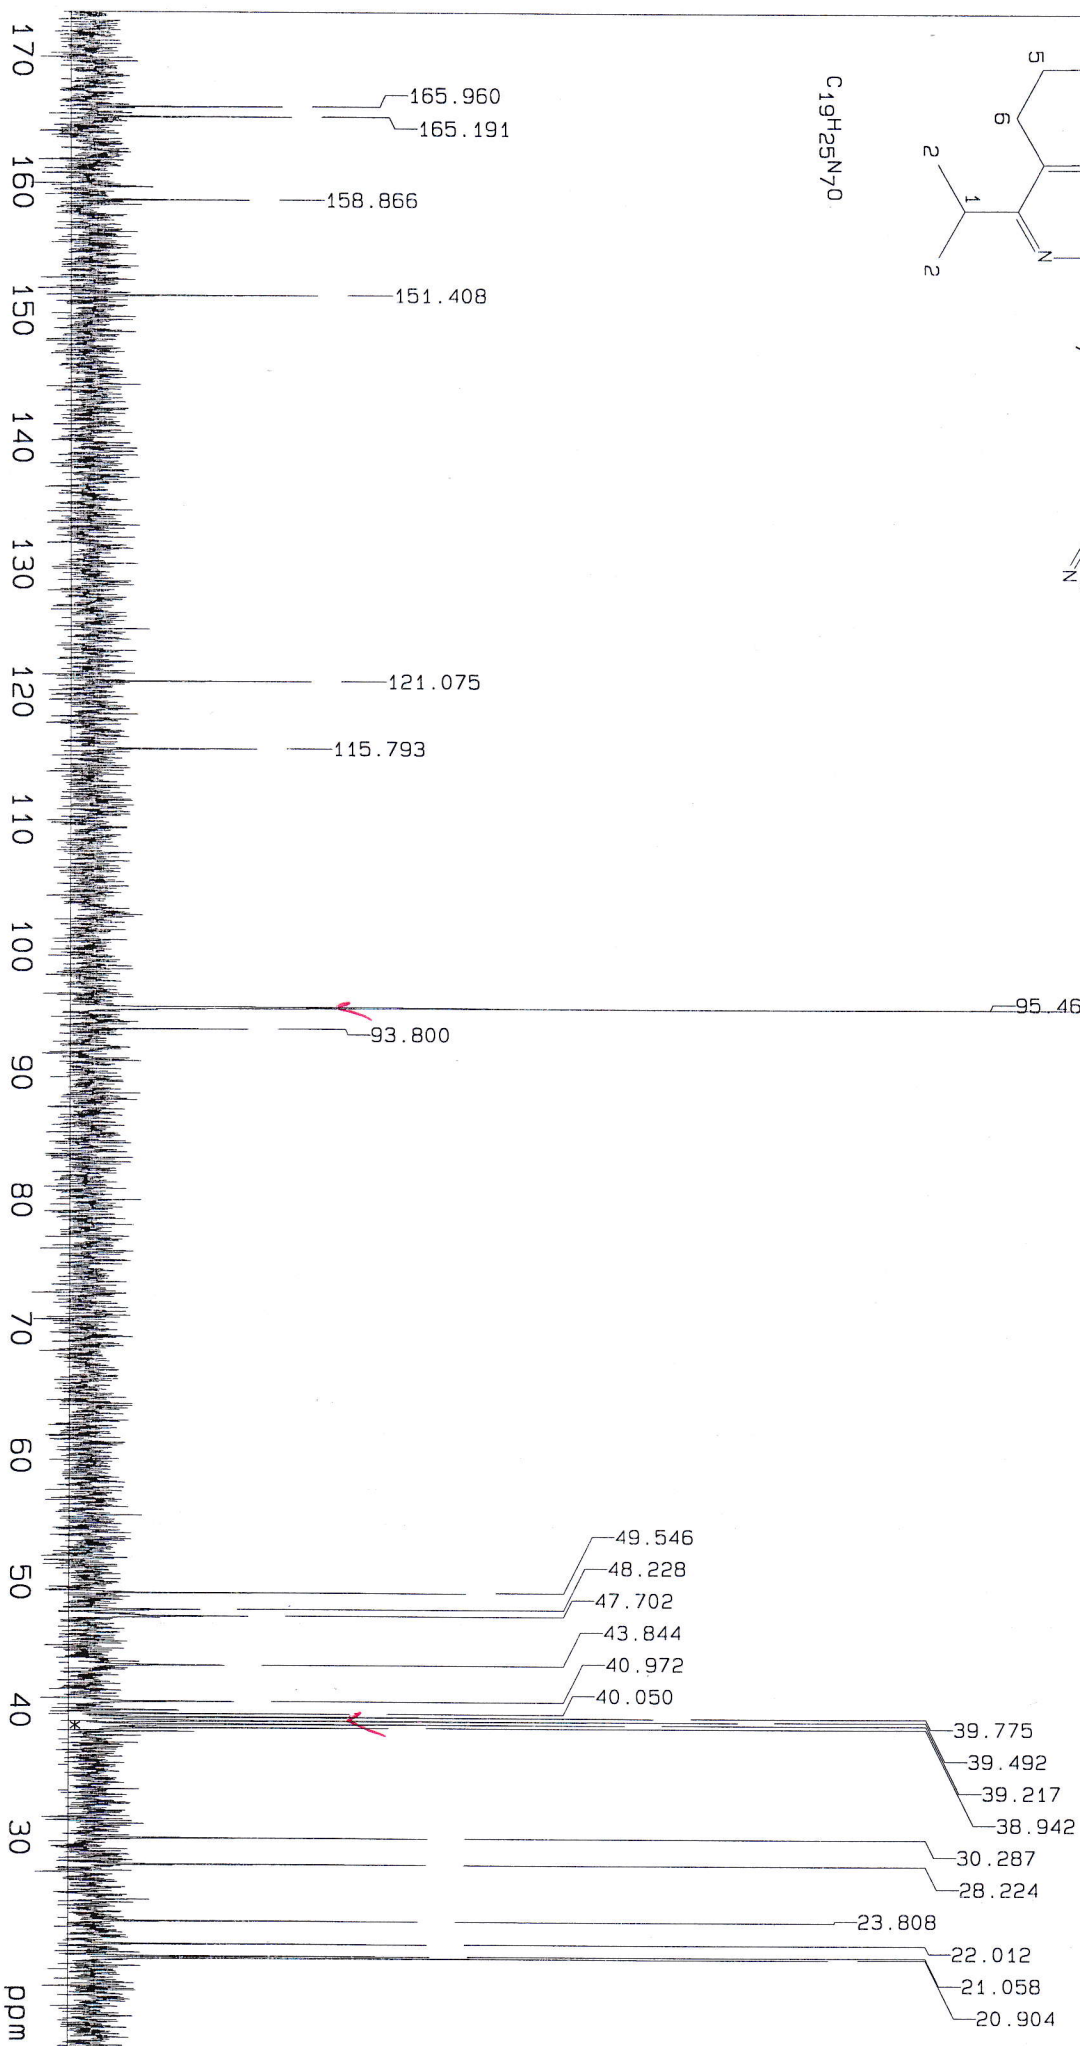

+  
[Signature]

3e

*[Handwritten signature]*

Molecular Structure Research Centre, Yerevan, Armenia, Varian Mercury-300VX

H1 300.088 MHz, nt = 16, np = 32000, temp = 30.0 C, lb = -0.2, solvent = DMSO/Cd4 1/3

Jun 28 2019

HA-1048-2

SAMV\_19 ha-1048-2

+

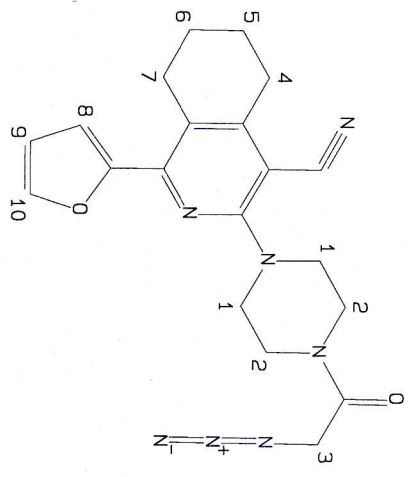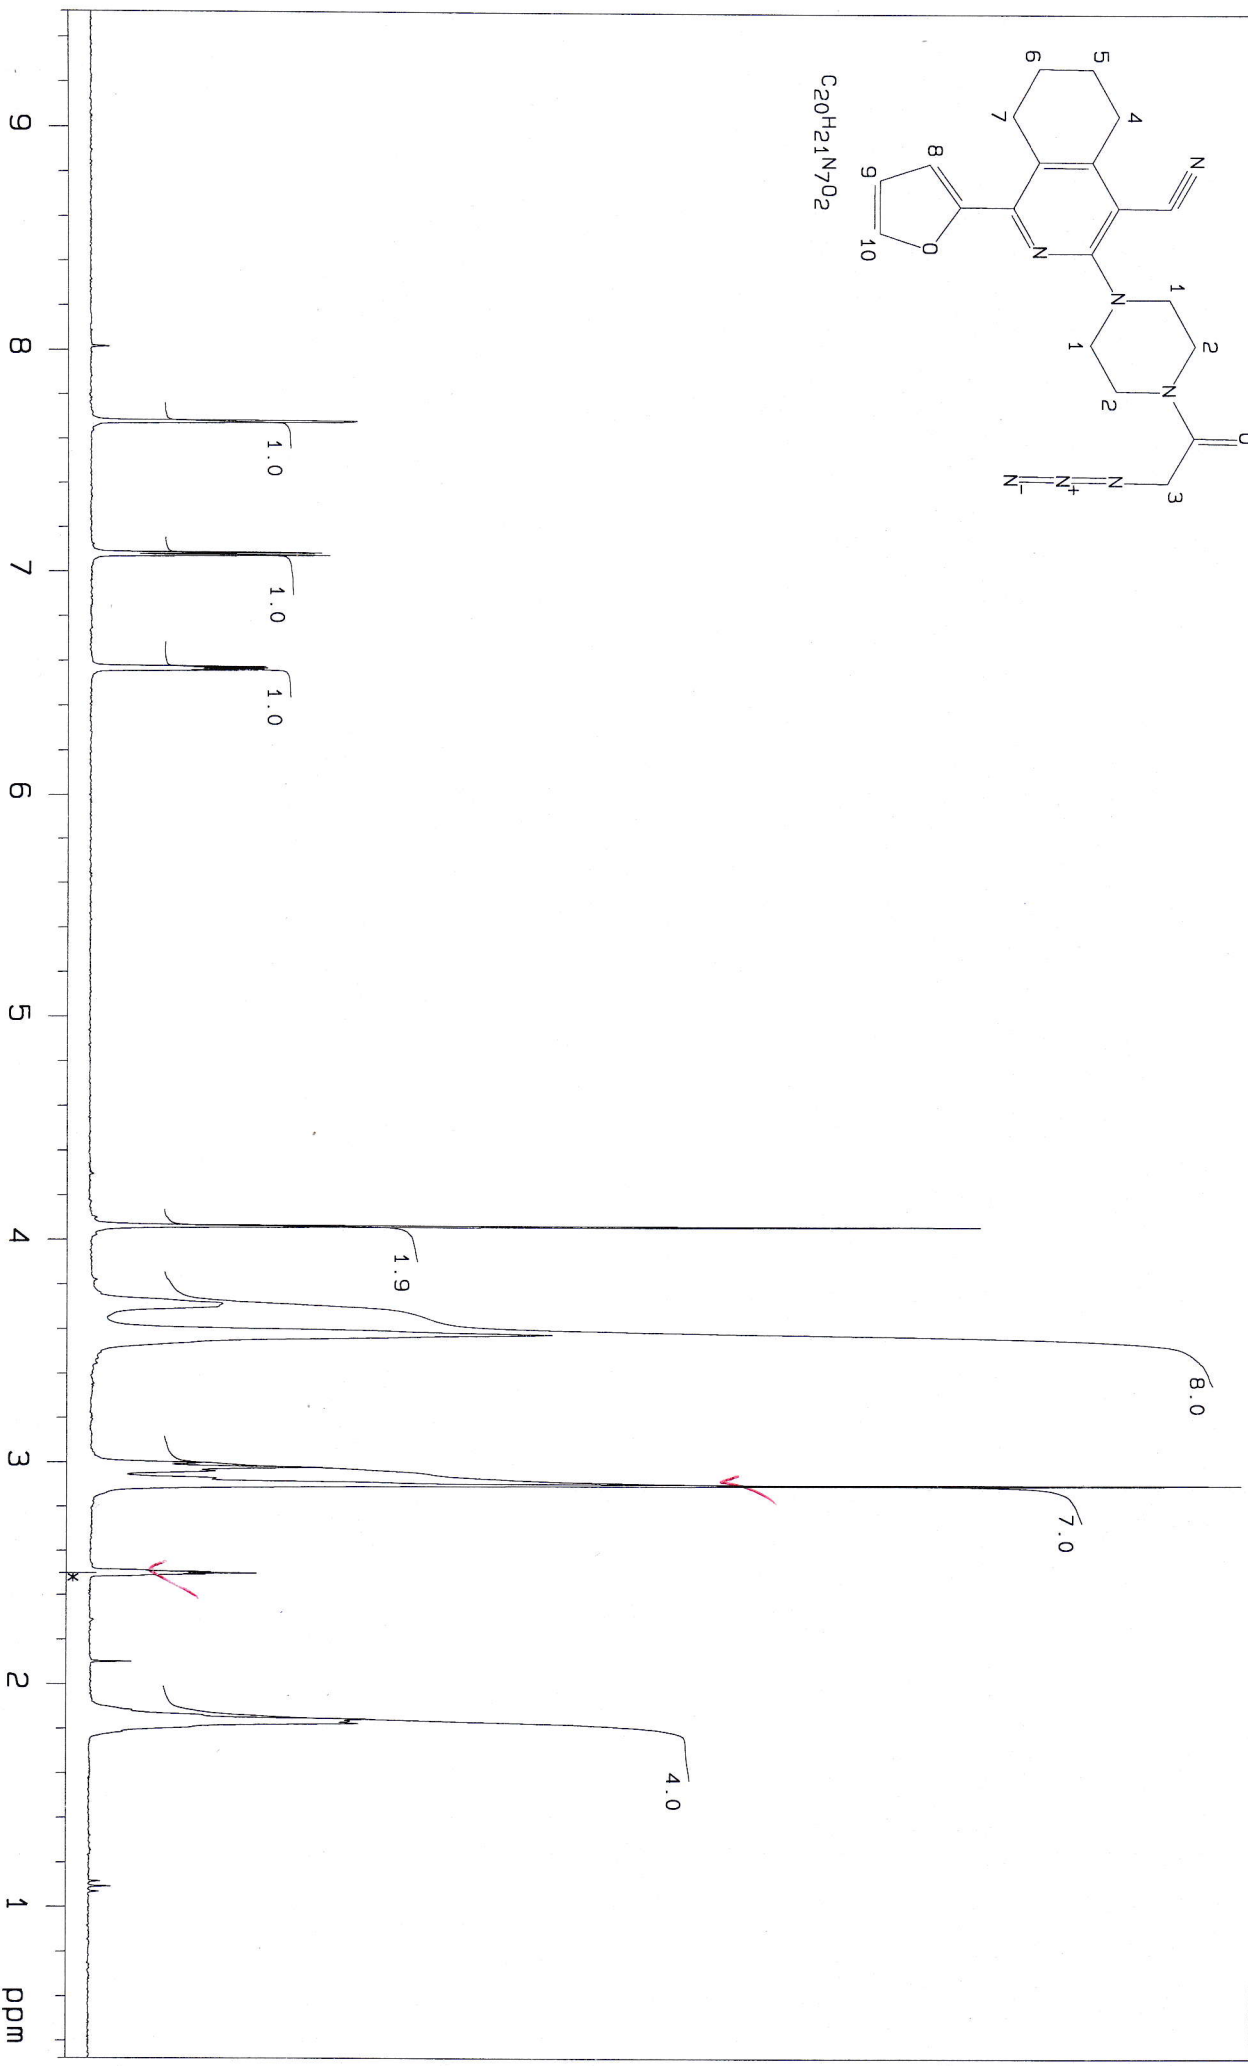

3e

Molecular Structure Research Centre, Yerevan, Armenia, Varian Mercury-300VX  
HA-1048-2

C13 75.465 MHz, nt = 624, np = 19998, temp = 30.0 C, lb = 1.0, solvent = DMSO/CCL4 1/3

SAMV\_19 ha-1048-2

Jun 28 2019

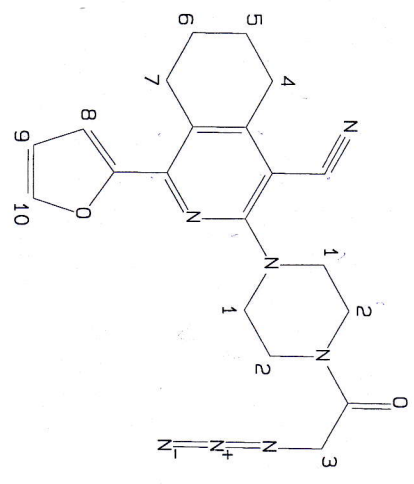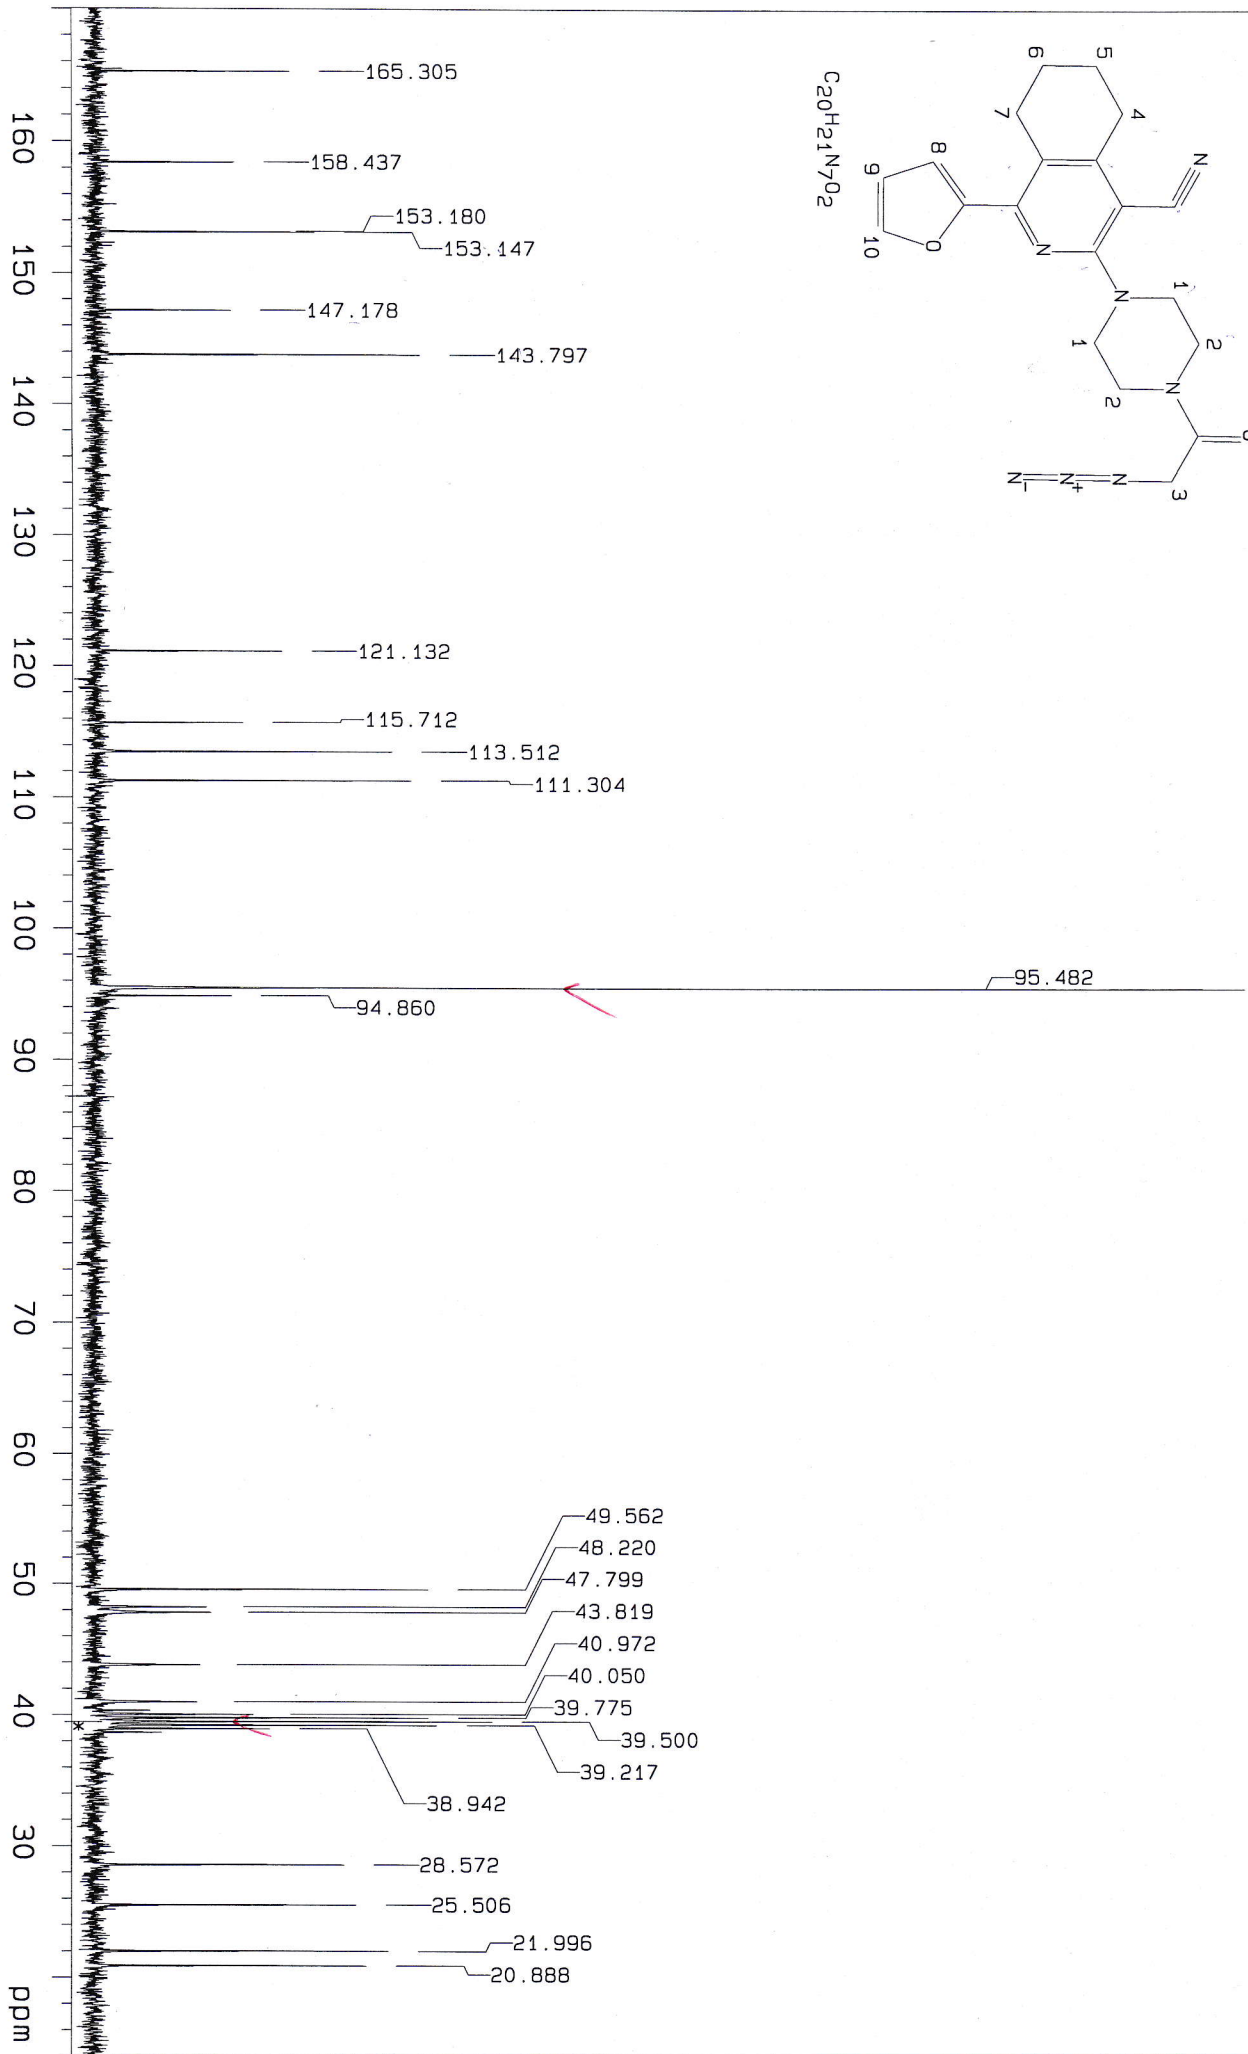

f  
[Signature]



56

*Arpac*

Molecular Structure Research Centre, Yerevan, Armenia, Varian Mercury-300VX

H1 300.088 MHz, nt = 16, np = 32000, temp = 30.0 C, lb = -0.2, solvent = DMSO/Cd4 1/3

May 17 2022

T20-145-3

ANUSH\_TEMA t20-145-3

+

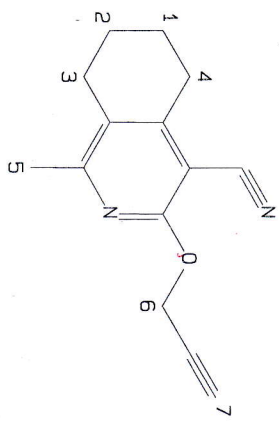

C<sub>14</sub>H<sub>14</sub>N<sub>2</sub>O

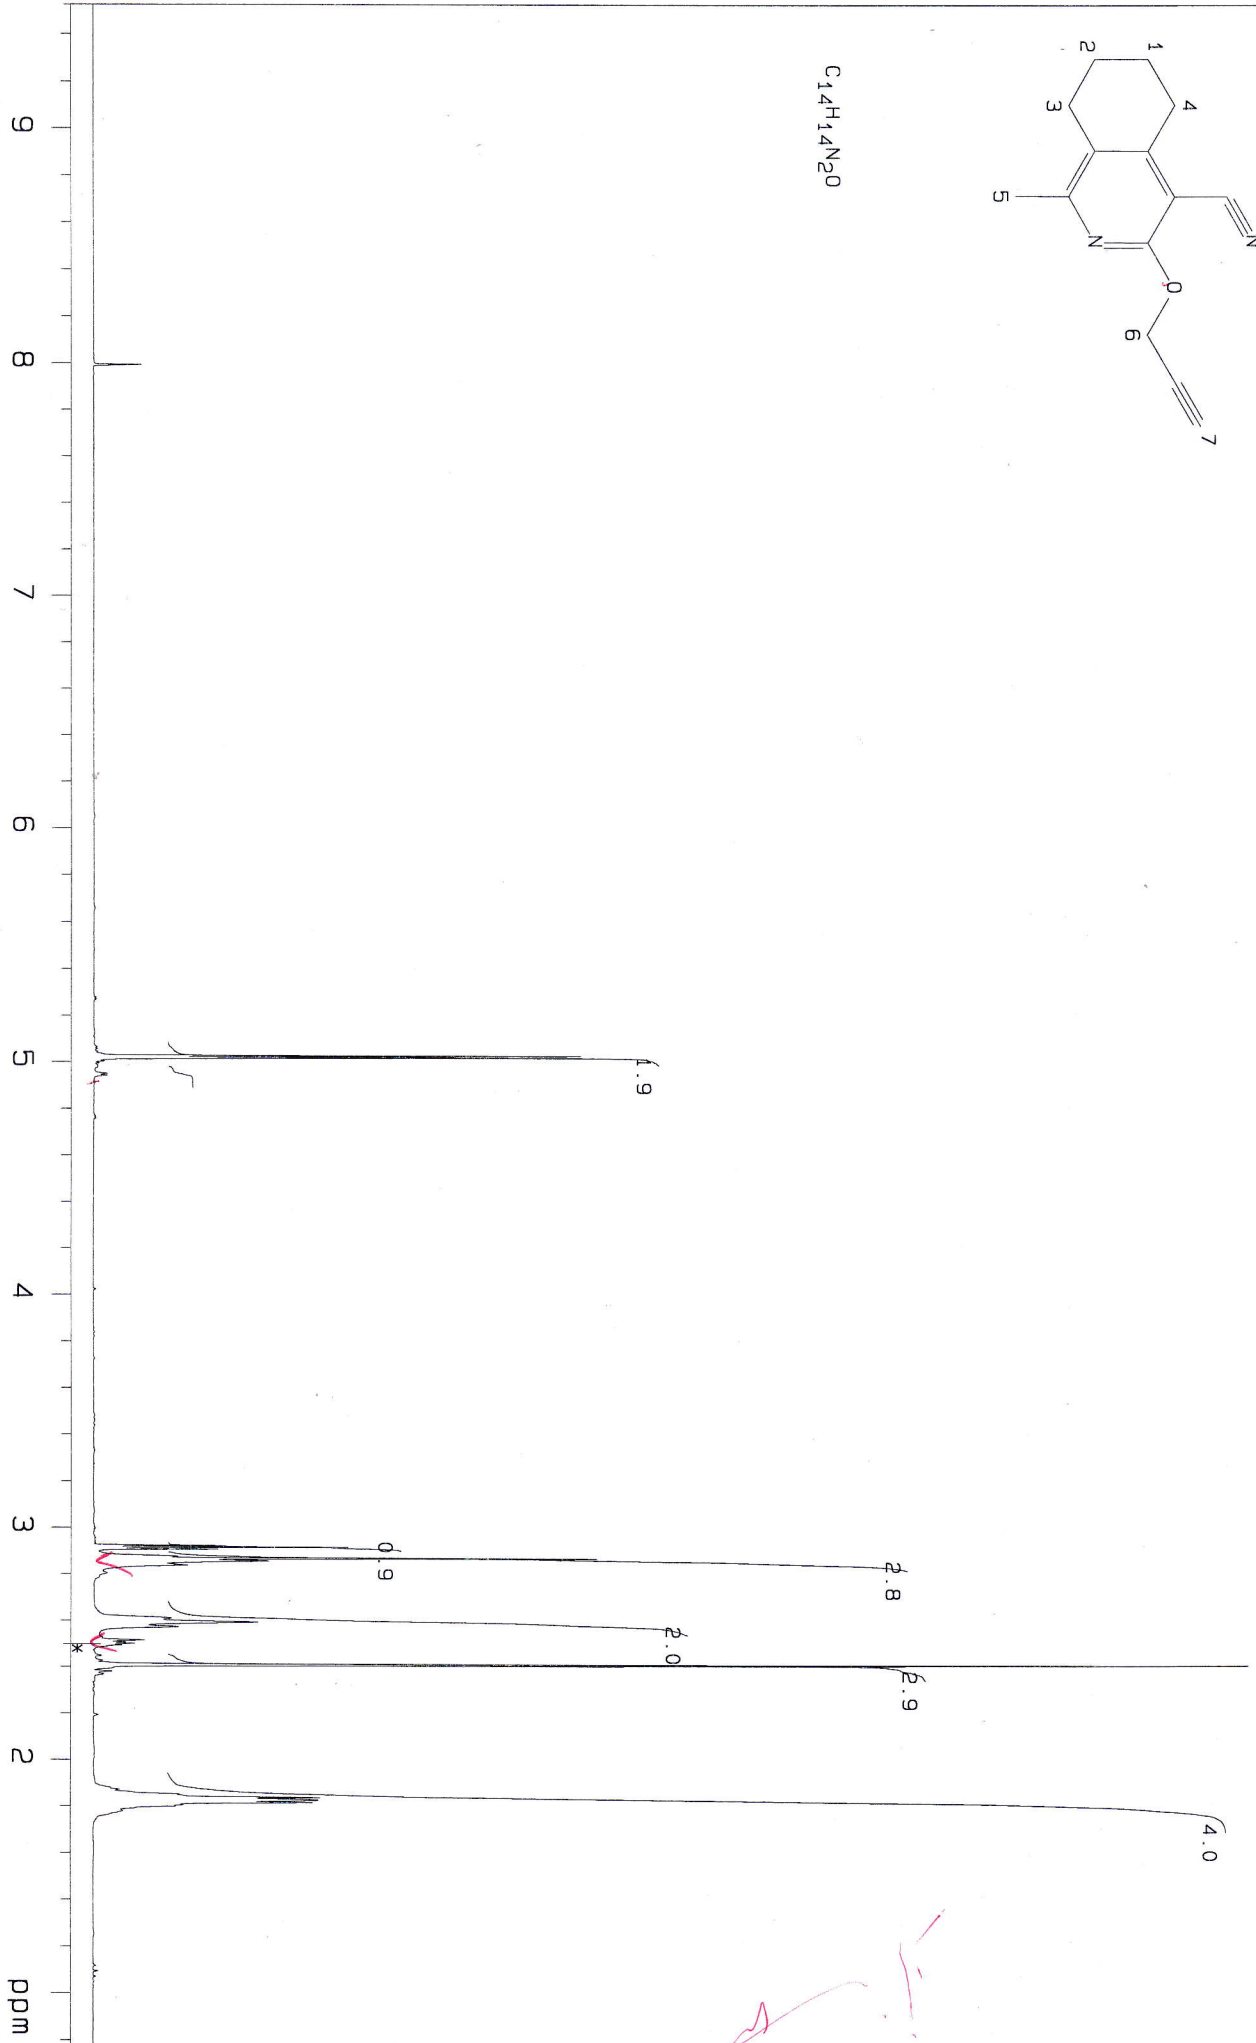



56

T20-145-3

ANUSH\_TEMA T20-145-3

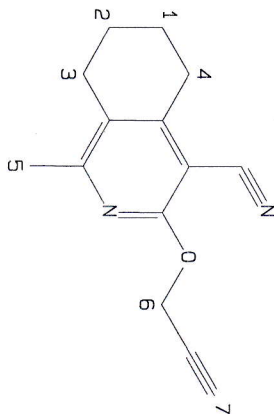

C<sub>14</sub>H<sub>14</sub>N<sub>2</sub>O

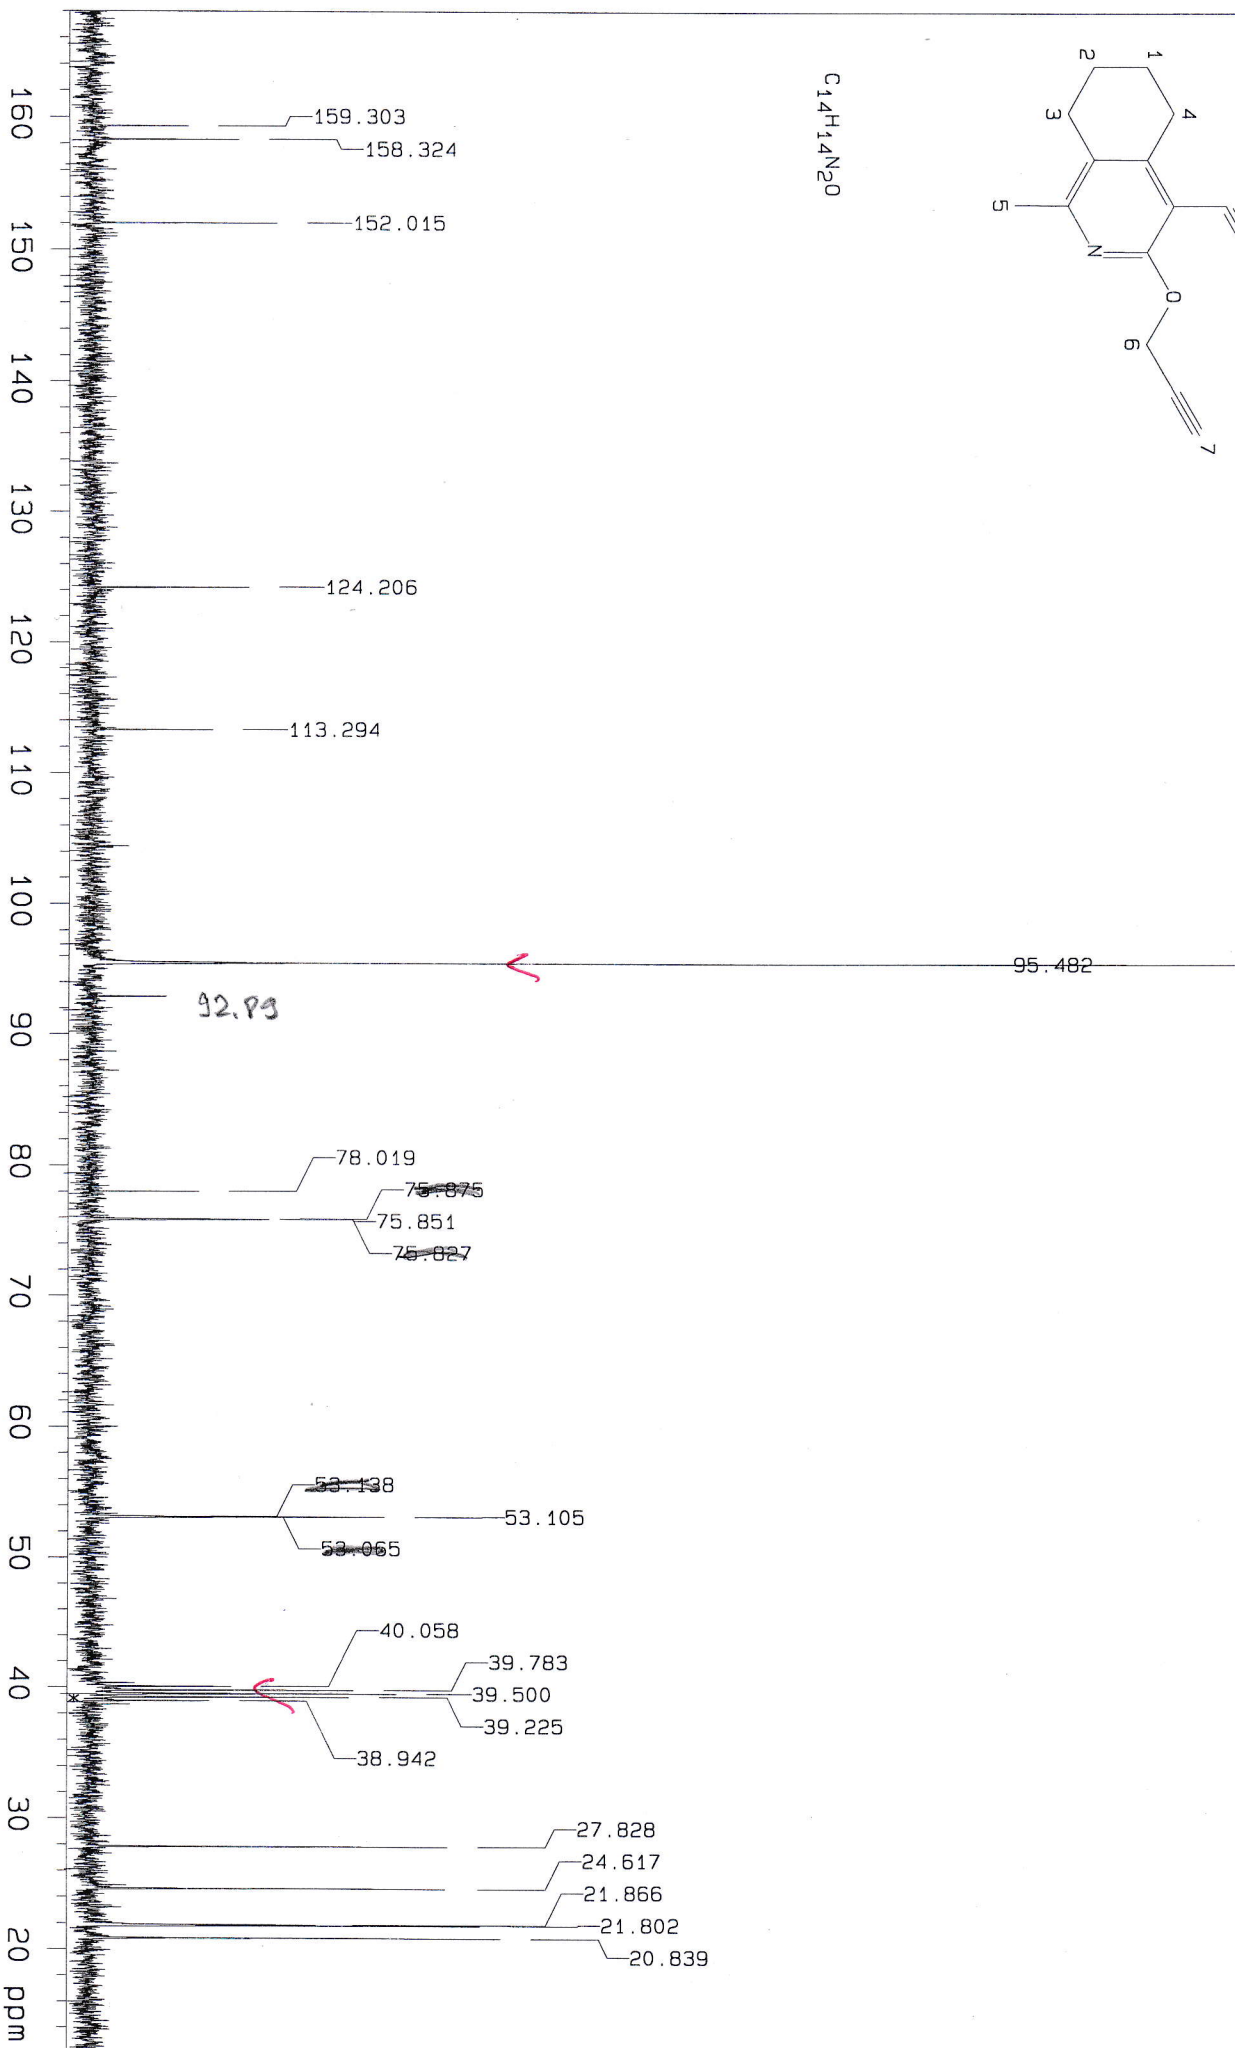

+  
*[Signature]*

5c

HA-996

SAMV\_18 ha-996

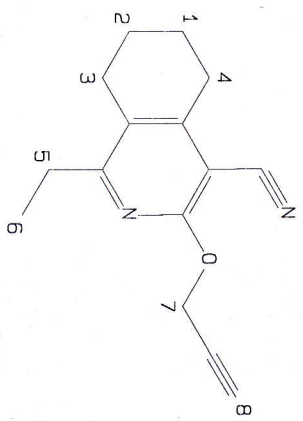

C<sub>15</sub>H<sub>14</sub>N<sub>2</sub>O

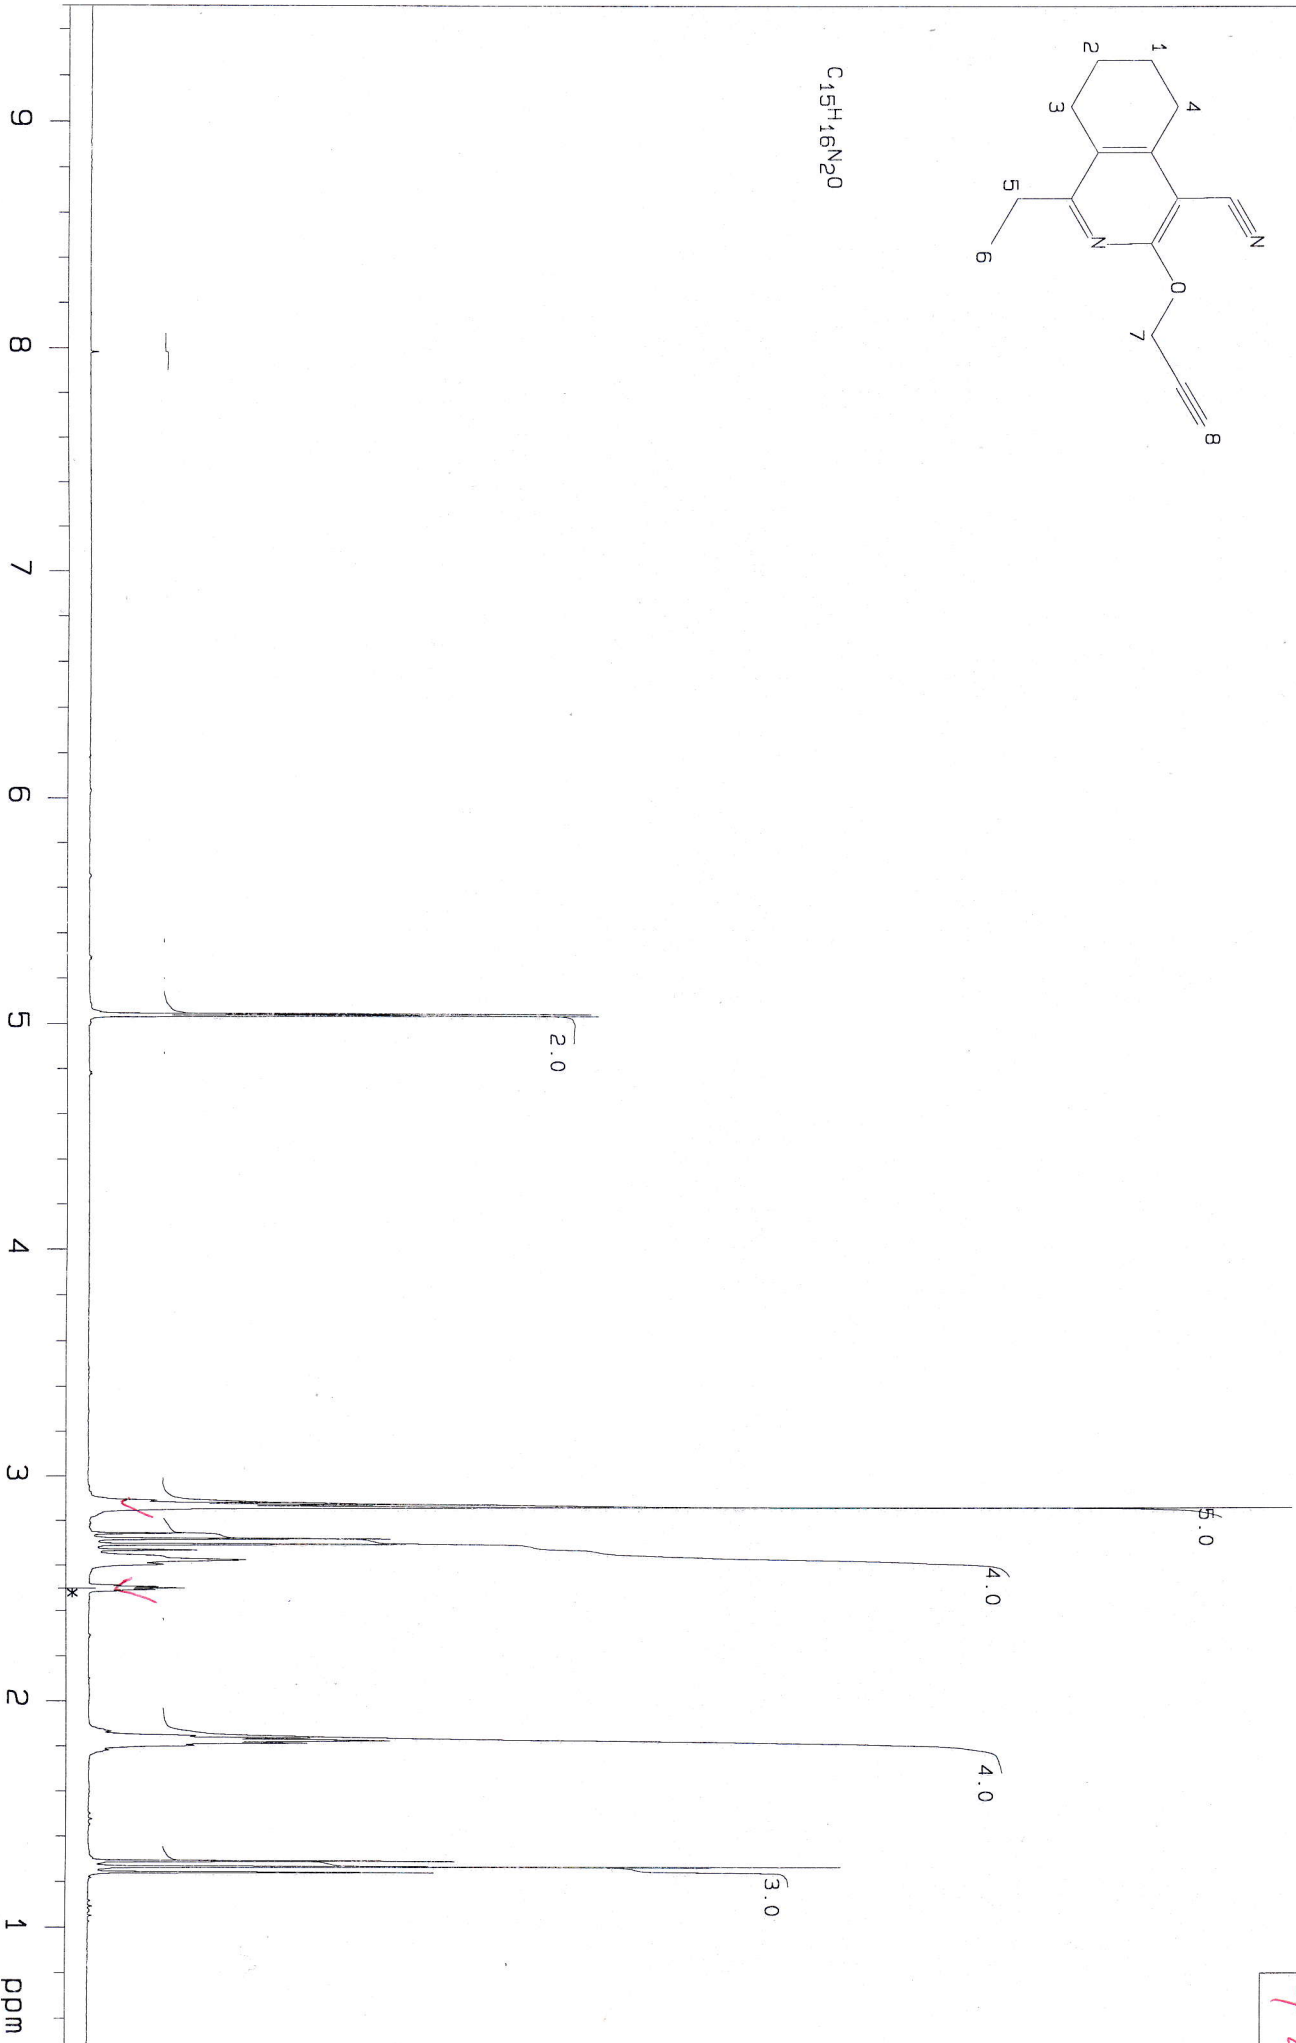

+ [Signature]

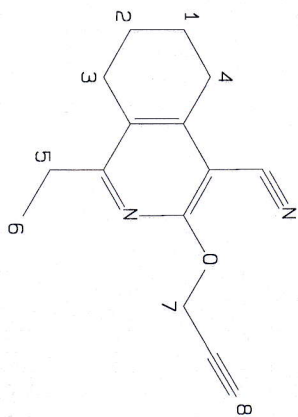

C<sub>15</sub>H<sub>16</sub>N<sub>2</sub>O

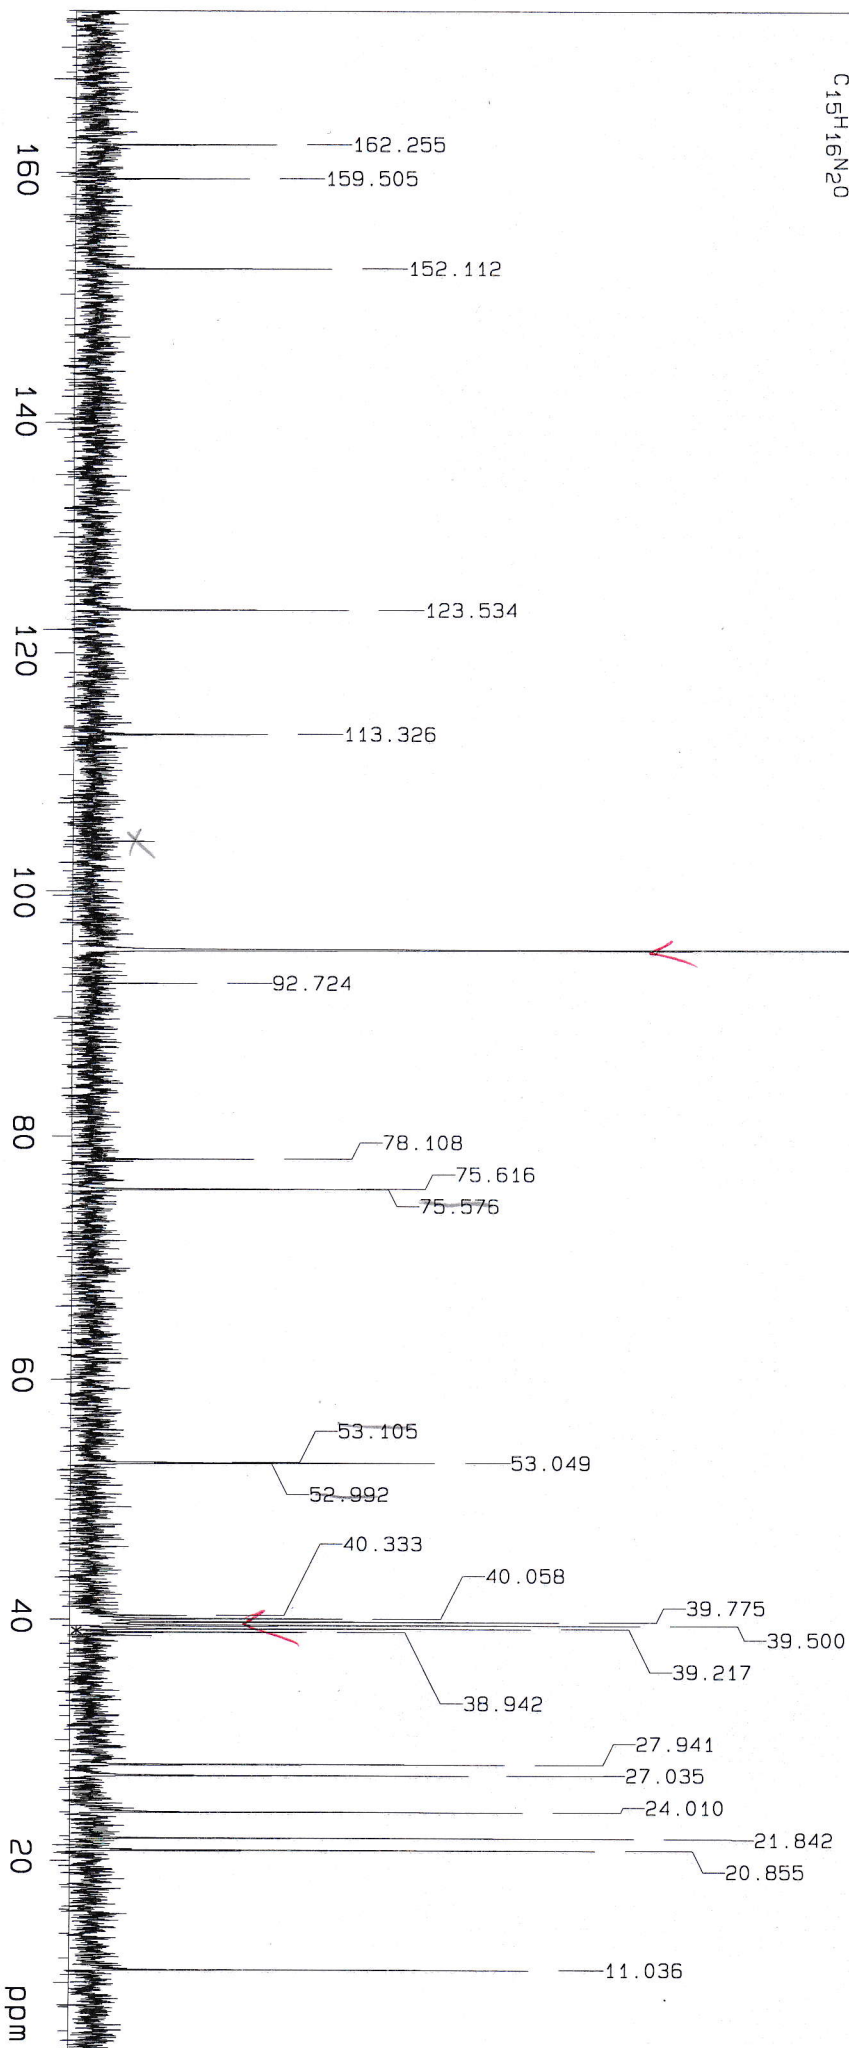

Handwritten signature



5h

HA-1011

SAMV\_19 ha-1011

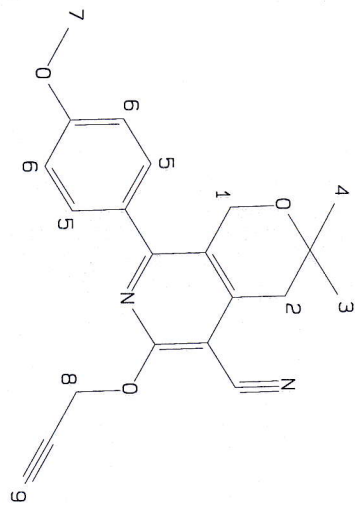

C<sub>21</sub>H<sub>20</sub>N<sub>2</sub>O<sub>3</sub>

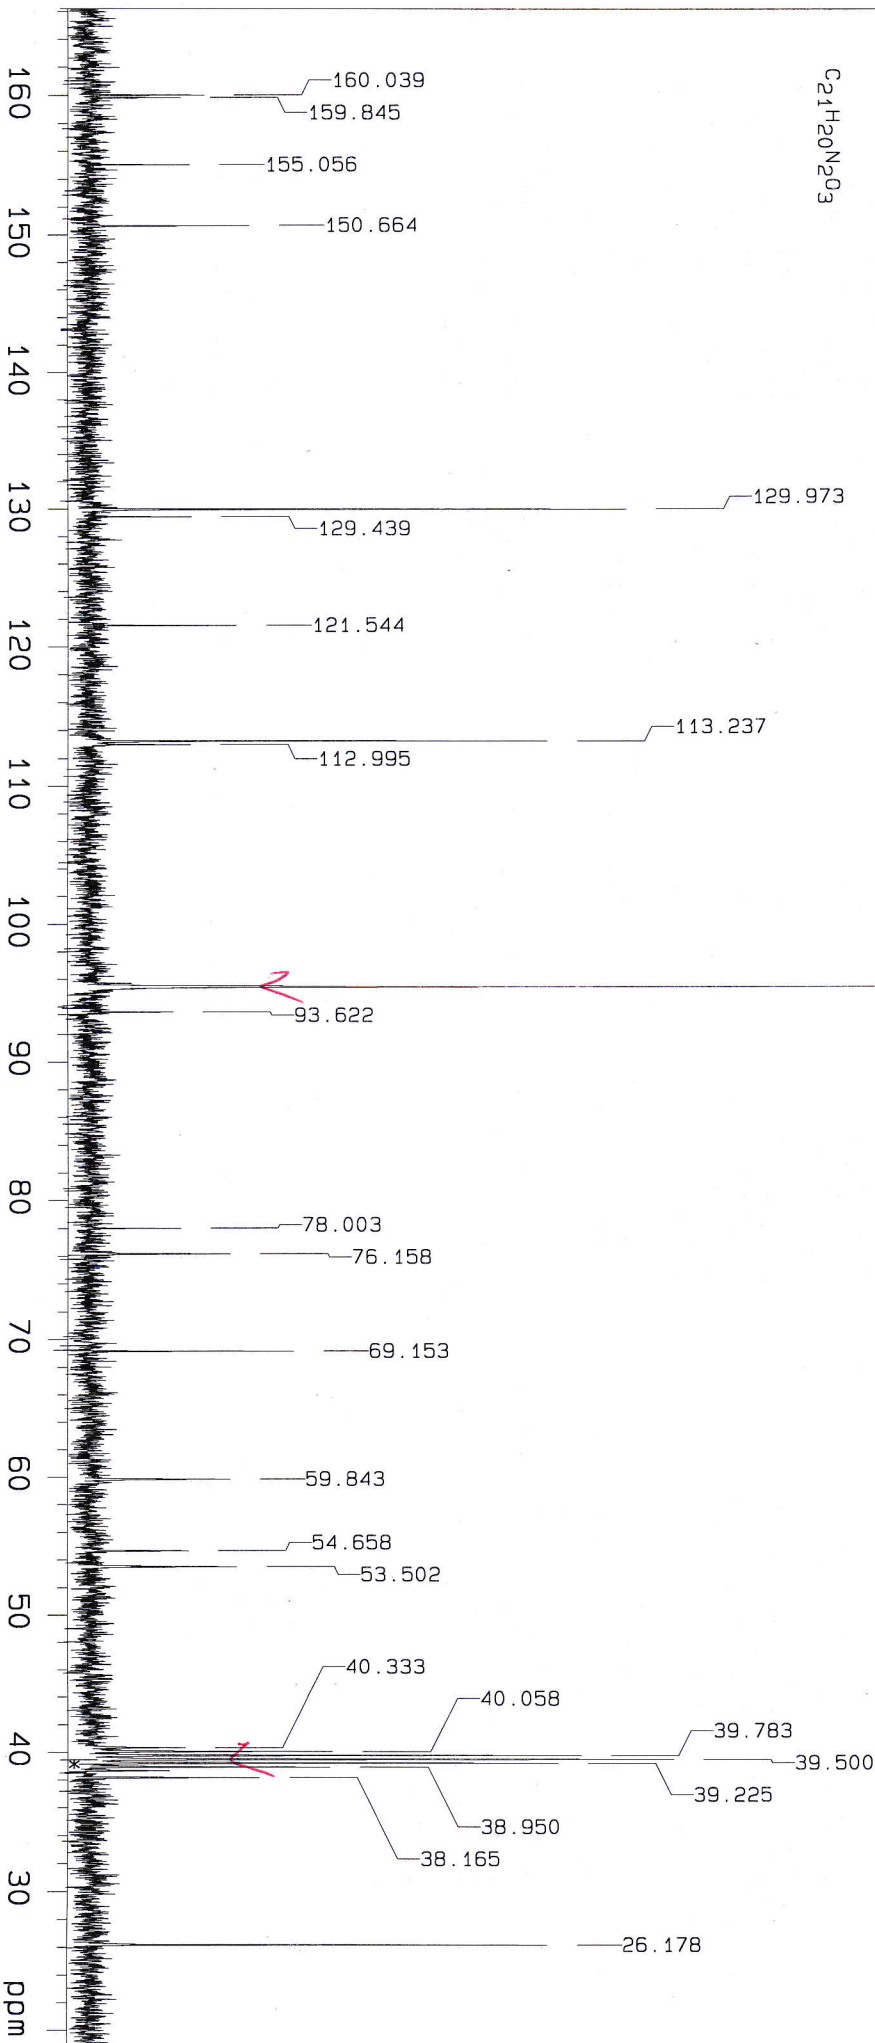

+  
*[Signature]*

52

Molecular Structure Research Centre, Yerevan, Armenia, Varian Mercury-300VX

H1 300.088 MHz, nt = 16, np = 32000, temp = 30.0 C, lb = -0.2, solvent = DMSO/C14 1/3

Dec 5 2018

HA-1000

SAMV\_18 ha-1000

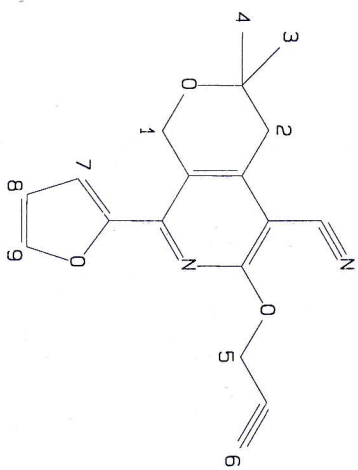

C<sub>18</sub>H<sub>16</sub>N<sub>2</sub>O<sub>3</sub>

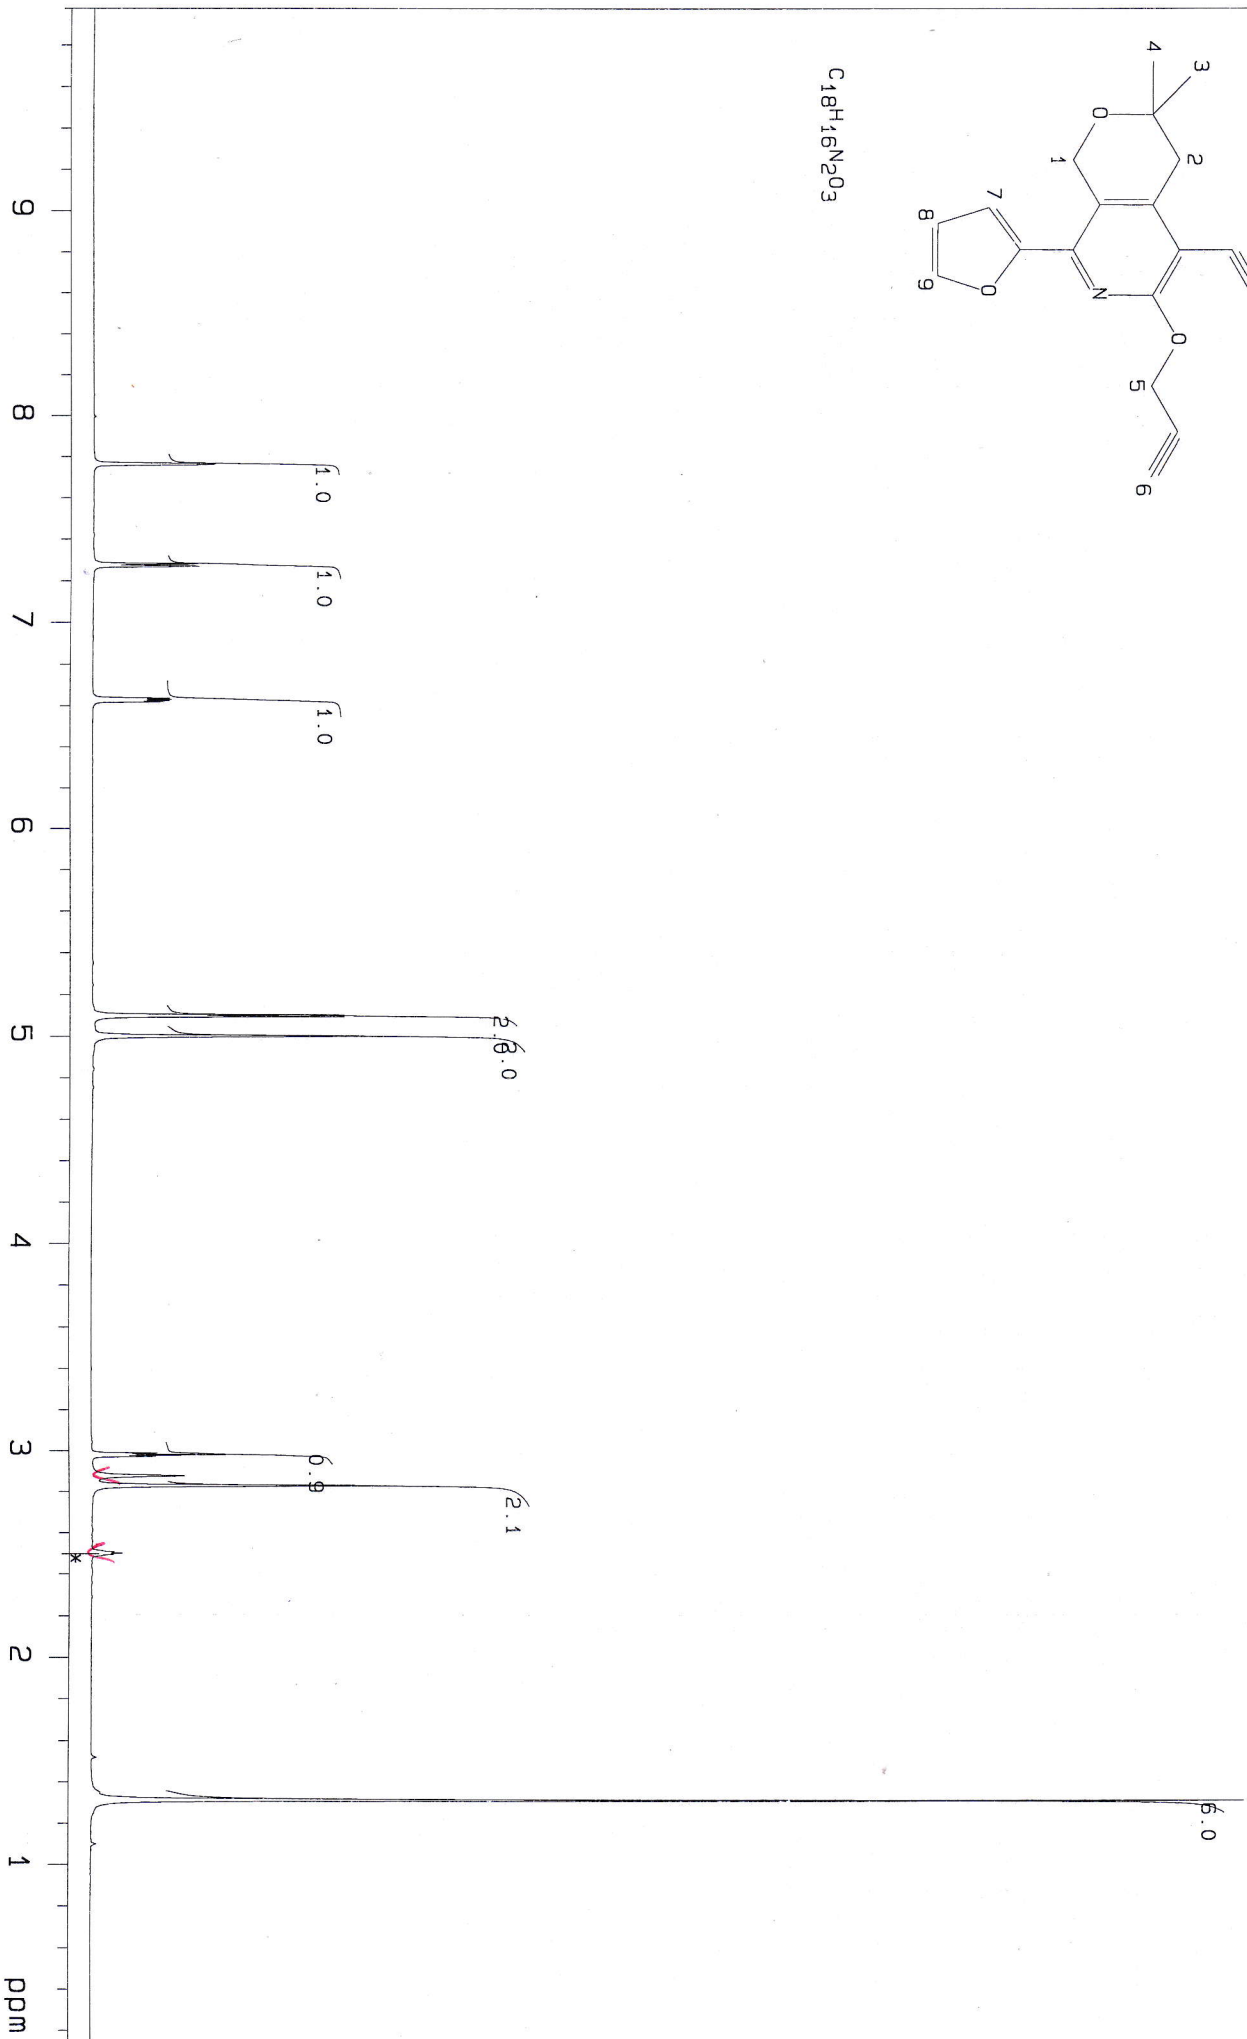

+



5i

HA-1000

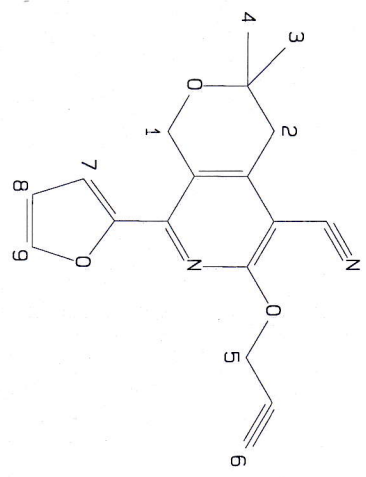

C<sub>18</sub>H<sub>16</sub>N<sub>2</sub>O<sub>3</sub>

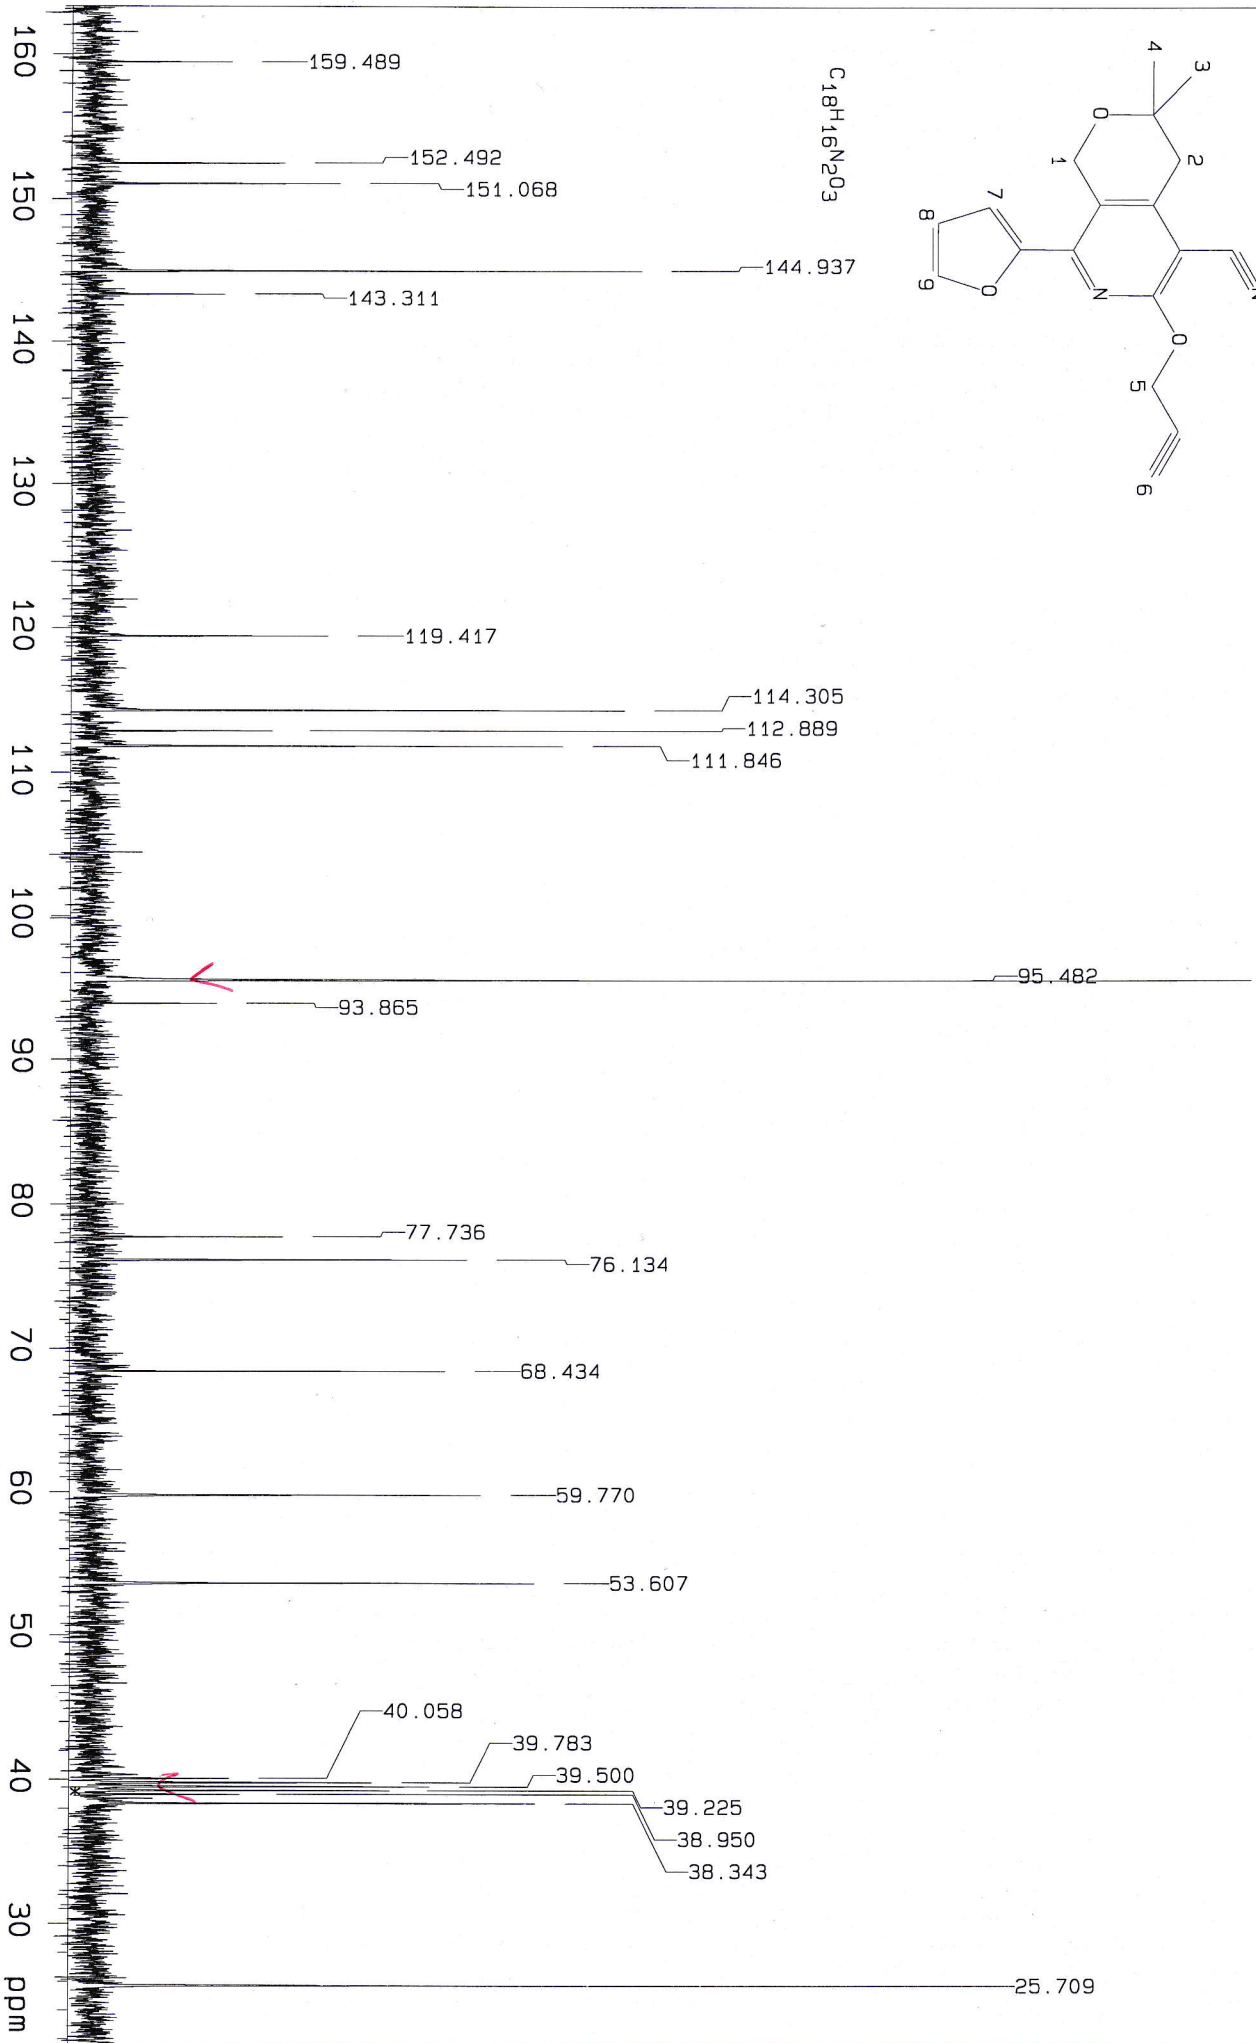

+  
*[Signature]*



56

Molecular Structure Research Centre, Yerevan, Armenia, Varian Mercury-300VX  
HA-1004

H1 300.088 MHz, nt = 16, np = 32000, temp = 30.0 C, lb = -0.2, solvent = DMSO/C4 1/3

SAMV\_19 na-1004

Feb 1 2019

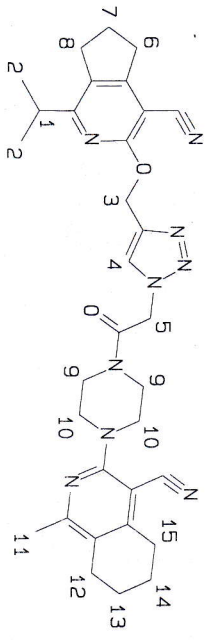

C<sub>32</sub>H<sub>37</sub>N<sub>9</sub>O<sub>2</sub>

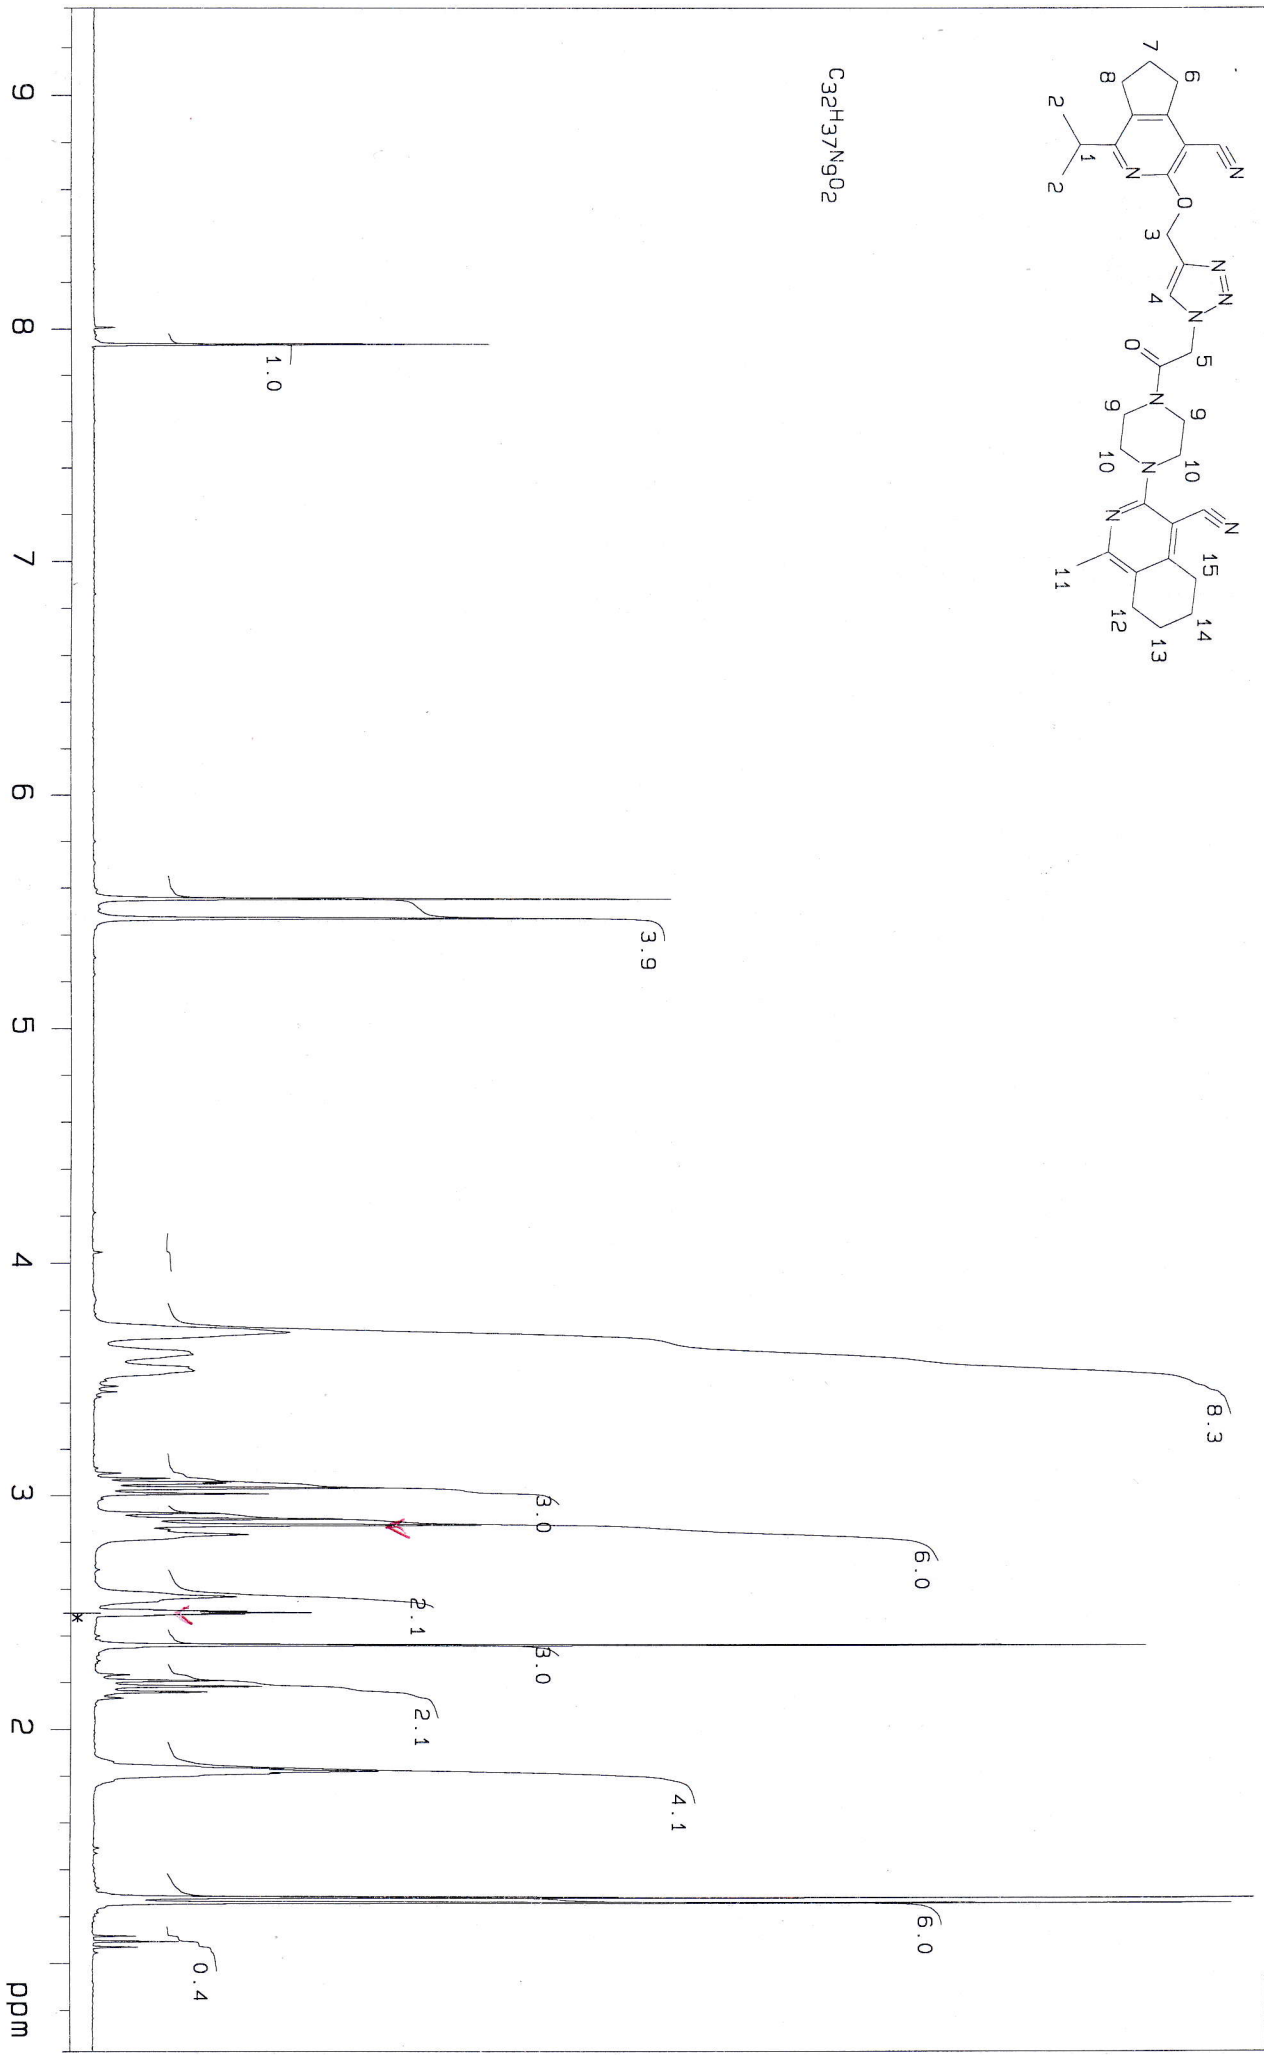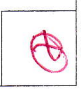

66

Molecular Structure Research Centre, Yerevan, Armenia, Varian Mercury-300VX  
**HA-1004**

C13 75.465 MHz, nt = 368, np = 19998, temp = 30.0 C, lb = 1.0, solvent = DMSO/C14 1/3  
SAMV\_19 ha-1004

Feb 1 2019

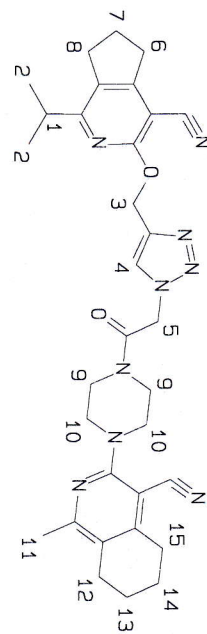

C<sub>32</sub>H<sub>37</sub>N<sub>9</sub>O<sub>2</sub>

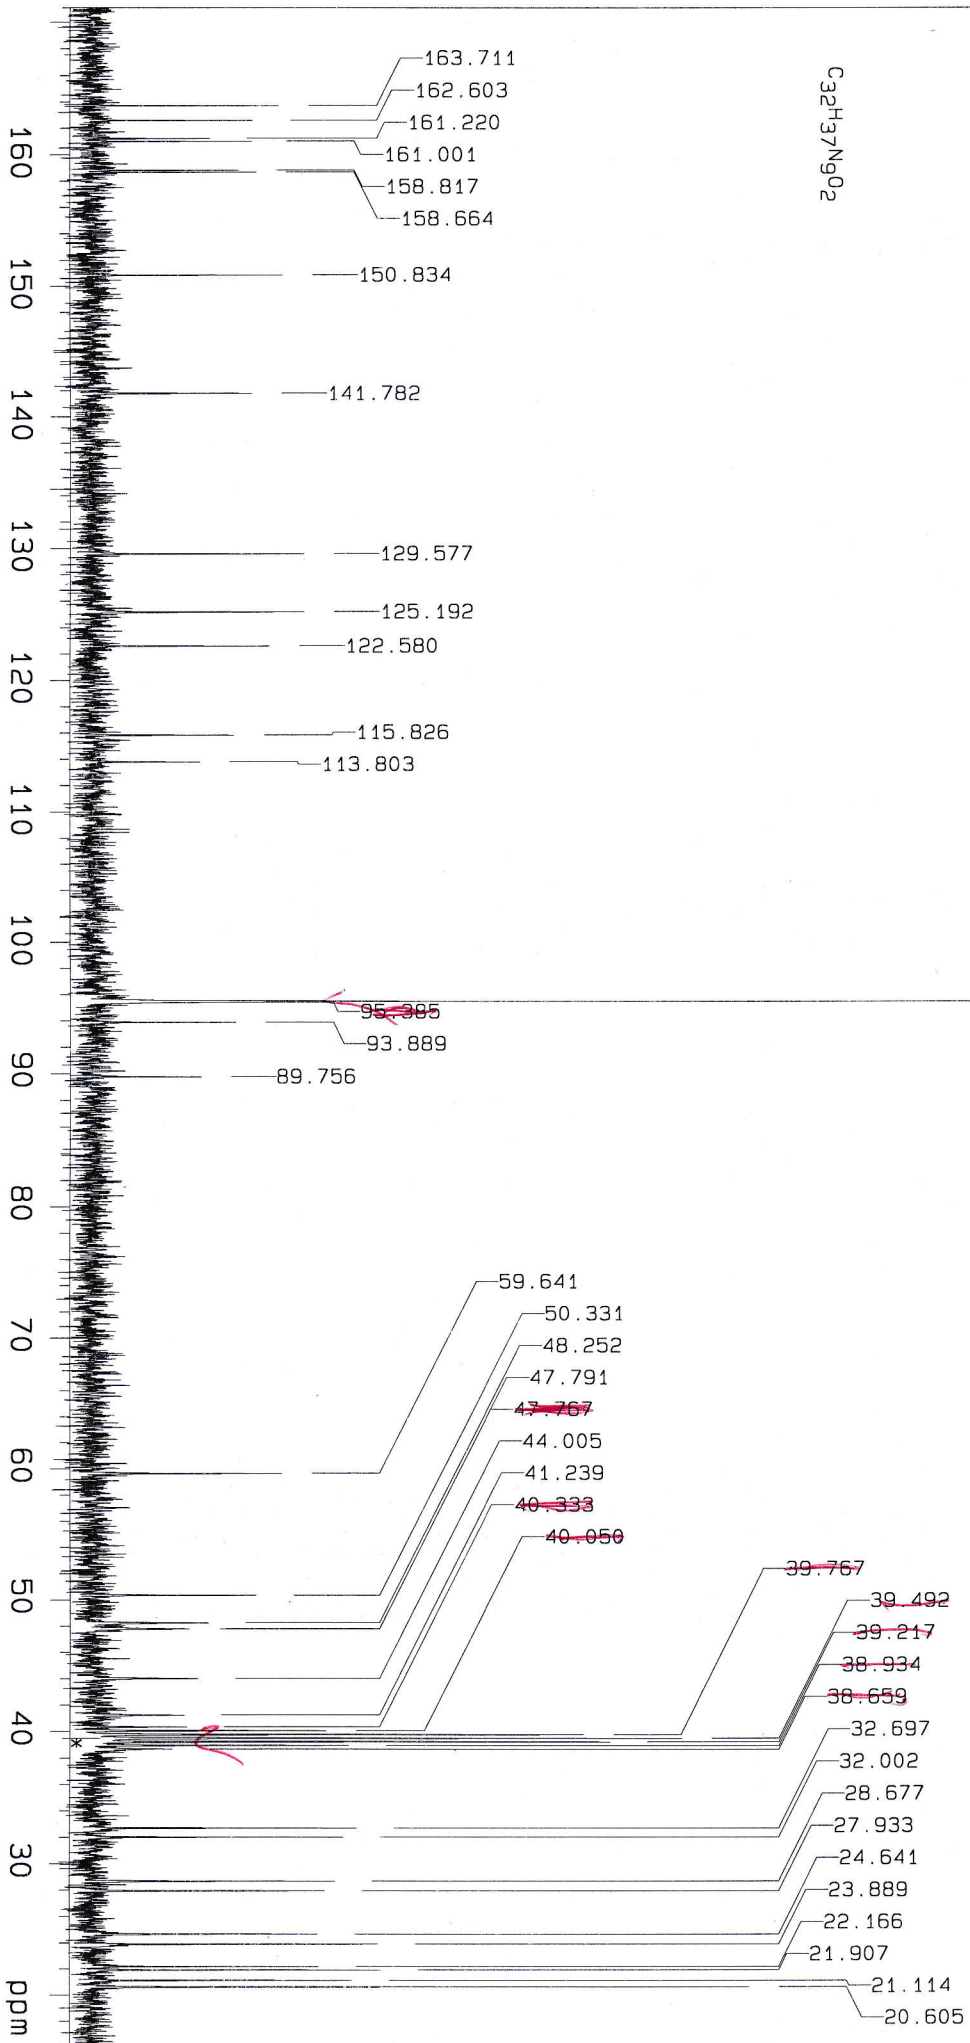

+  
[Signature]



6c Hybrid 021

Molecular Structure Research Centre, Yerevan, Armenia, Varian Mercury-300VX  
T20-147

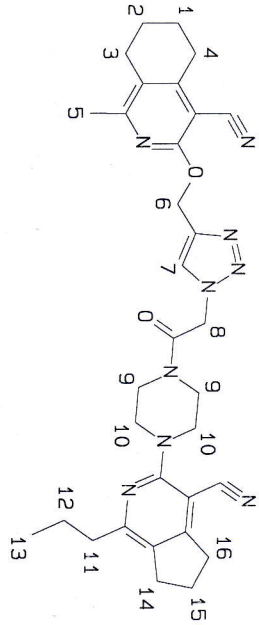

C<sub>32</sub>H<sub>37</sub>N<sub>9</sub>O<sub>2</sub>

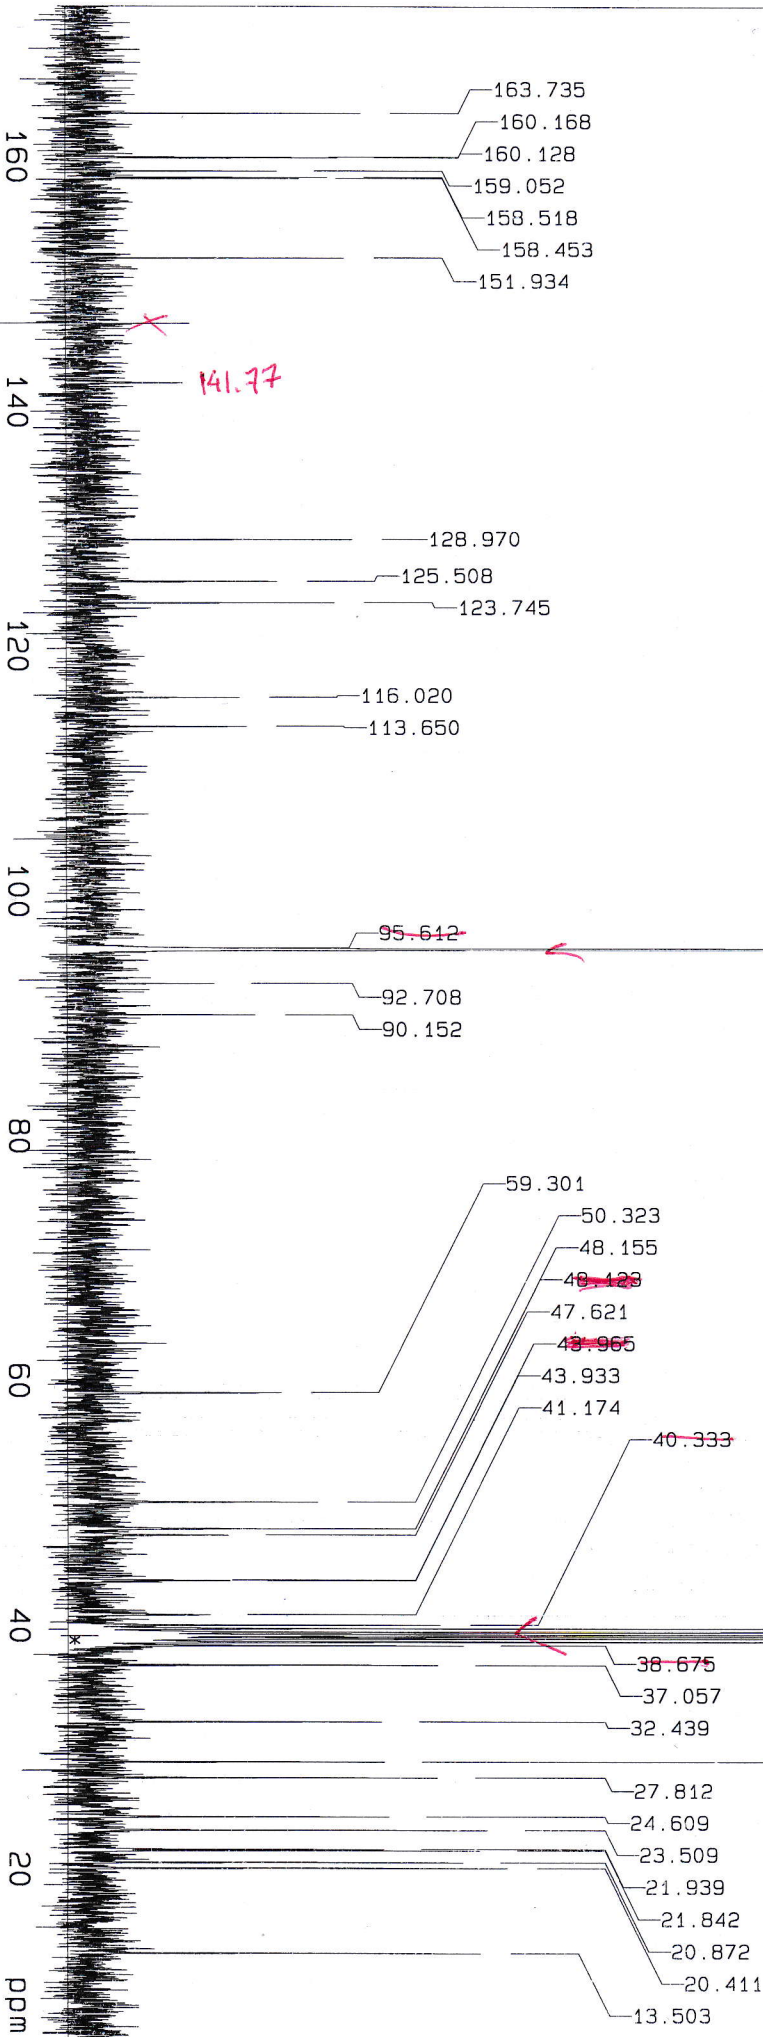

C13 75.465 MHz, nt = 1408, np = 19998, temp = 30.0 C, lb = 1.0, solvent = DMSO-CCl4 1/3

ANUSH TEMA T20-147

Oct 20 2021

+ [Signature]

Hybrid 021

SPIN42 3 (0.305)

100

Scan ES+  
6.13e6

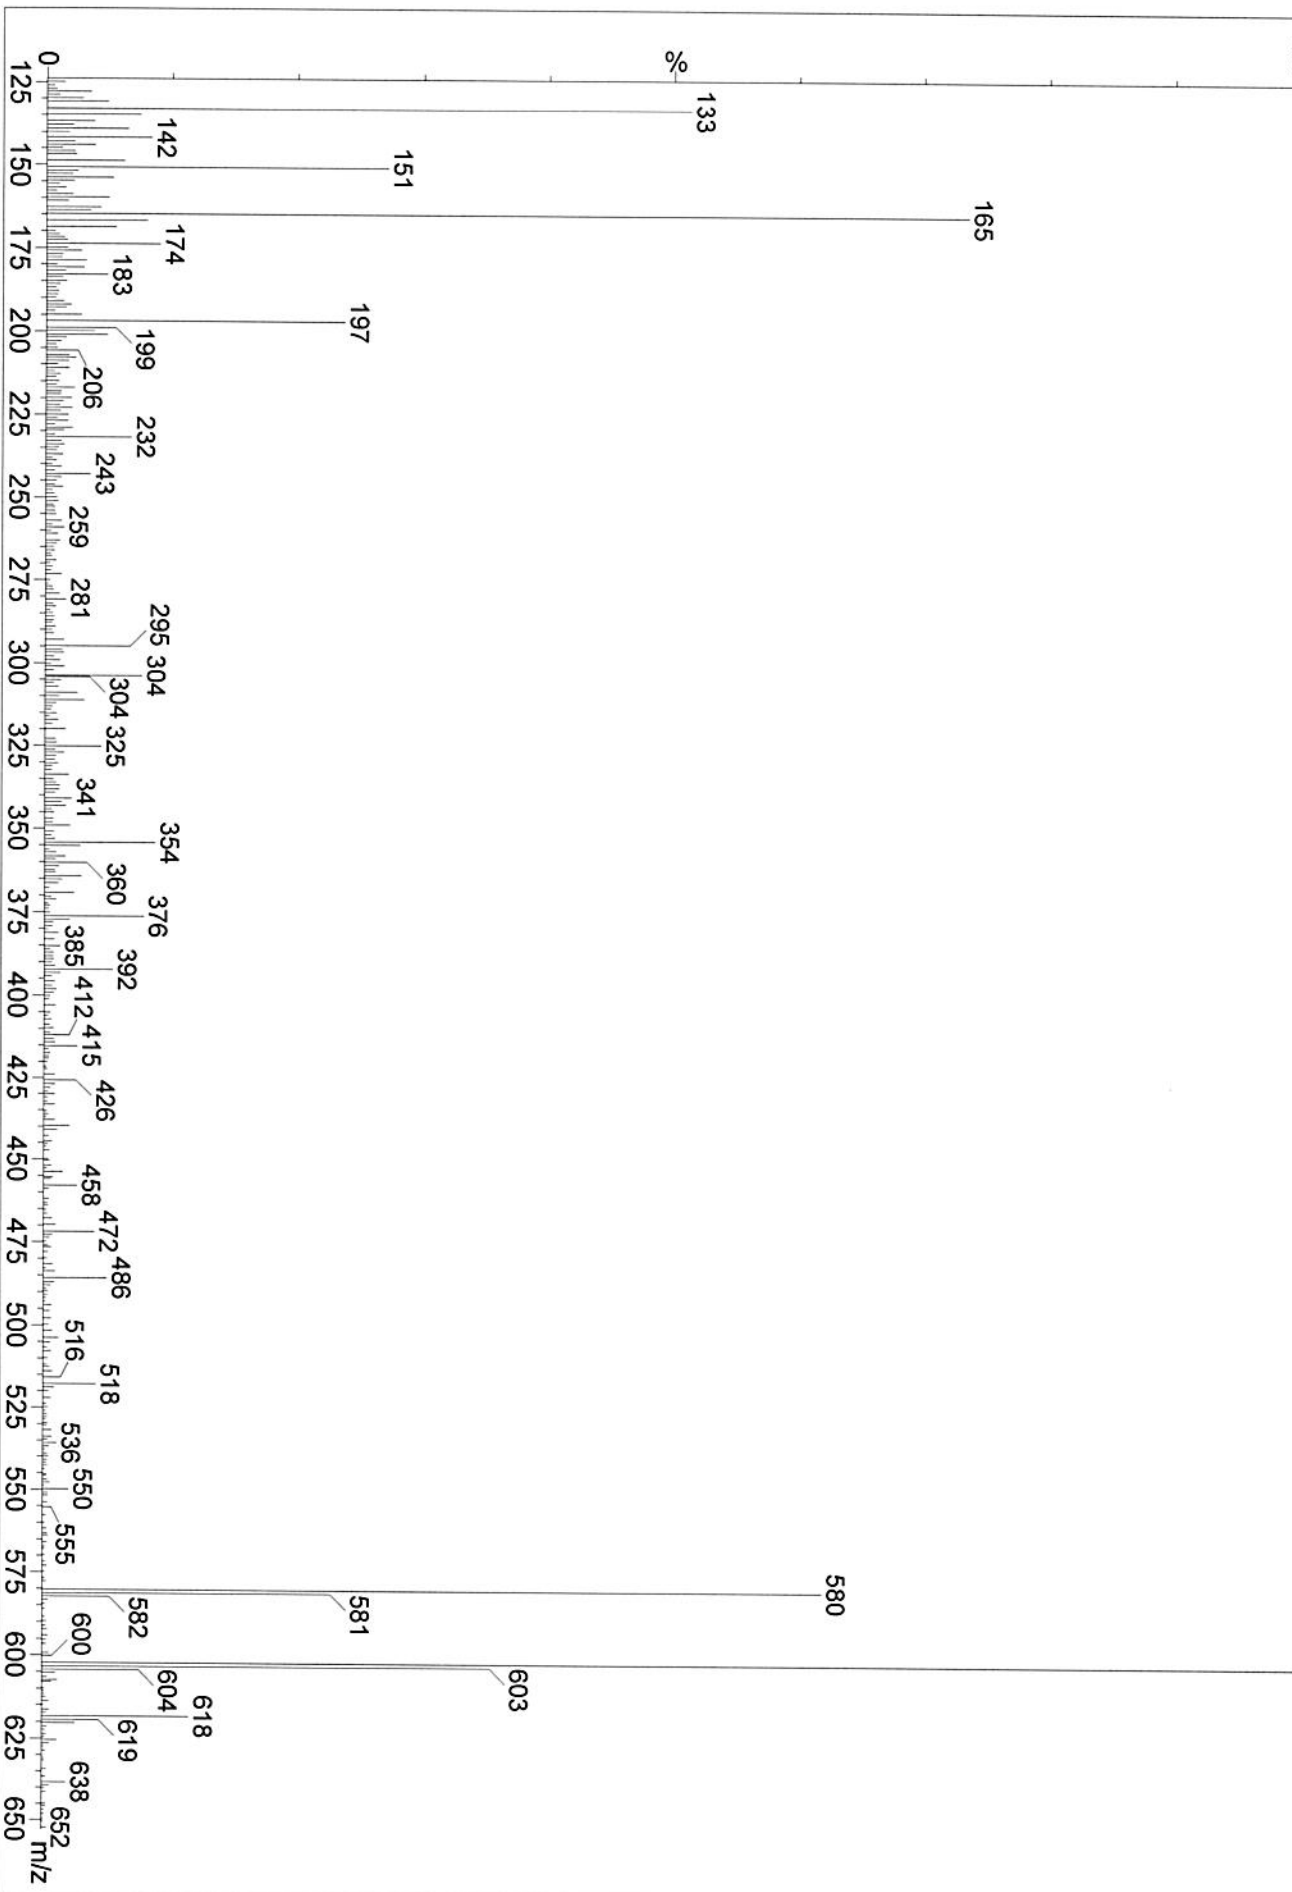

**Hybrid 021**

SPIN42 (0.102) Cu (0.20); Is (1.00,1.00) C32H37N9O2Na1  
602.2968

Scan ES+  
6.80e12

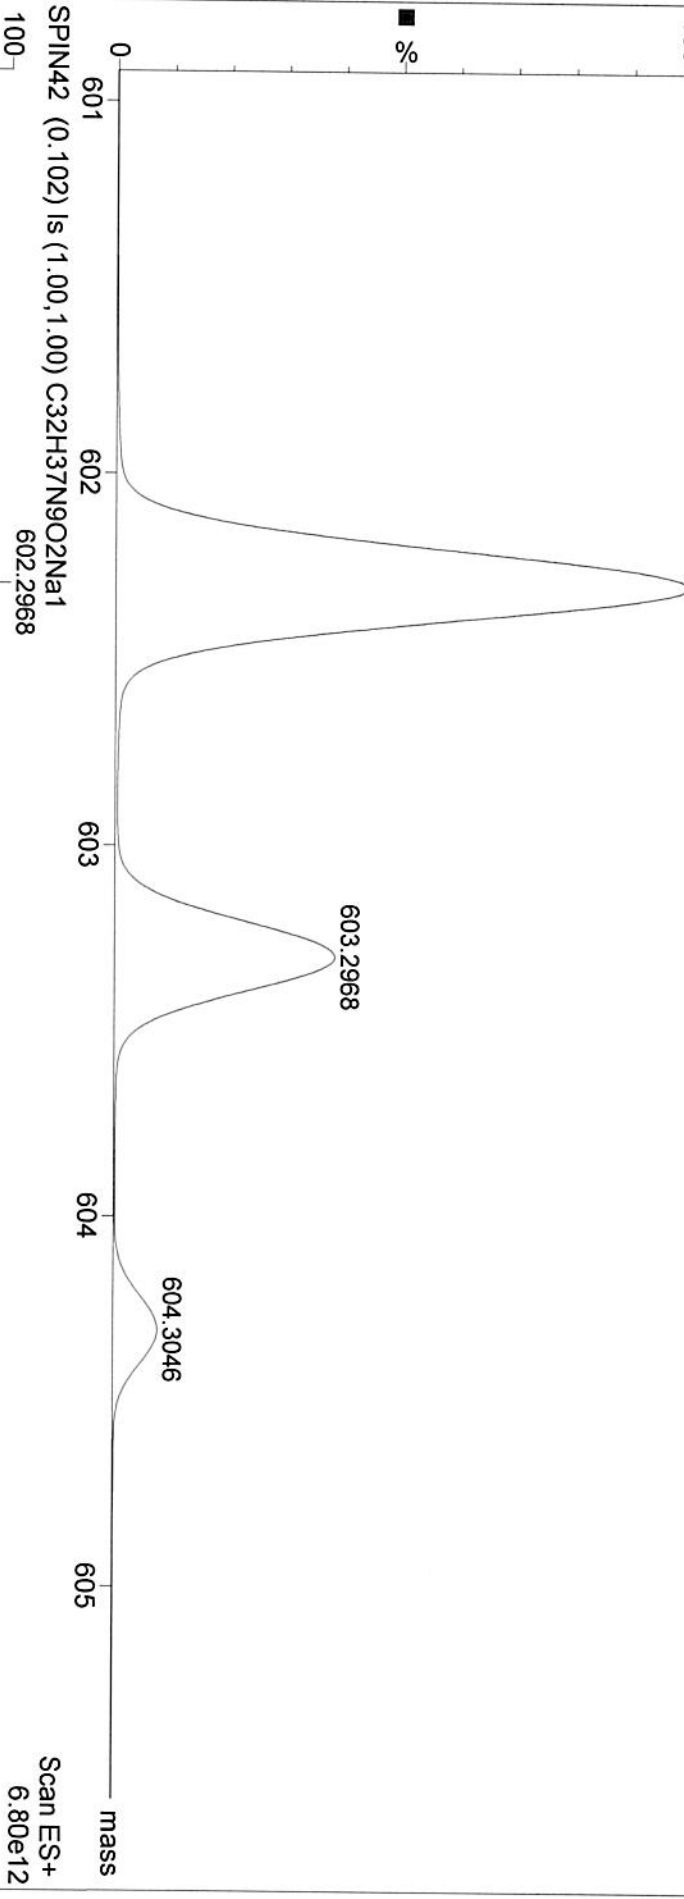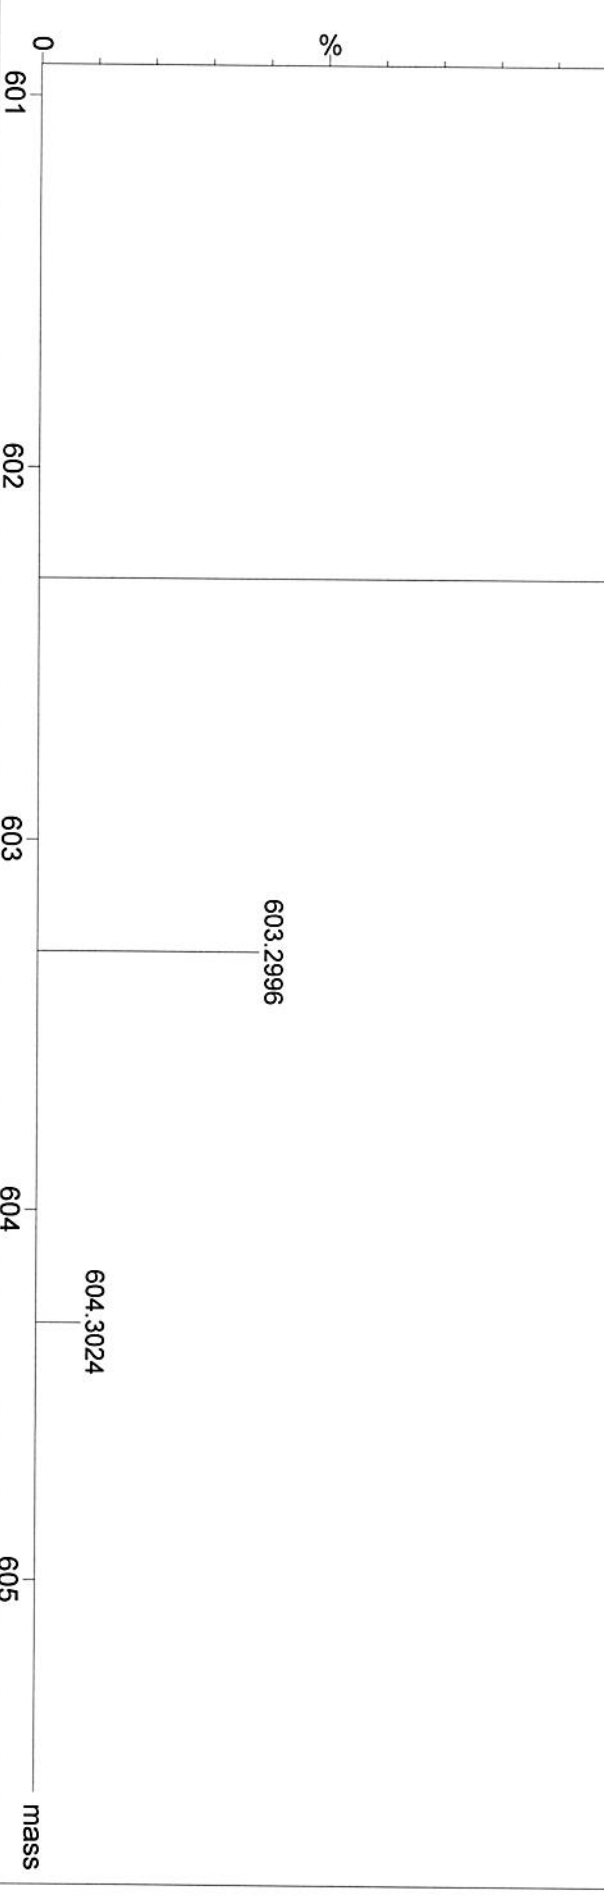



Hybrid 020 6d

Molecular Structure Research Centre, Yerevan, Armenia, Varian Mercury-300VX

H1 300.088 MHz, nt = 16, np = 32000, temp = 30.0 C, lb = -0.2, solvent = DMSO/C14 1/3

T20-146

ANDUSH\_TEMMA t20-146

Oct 7 2021

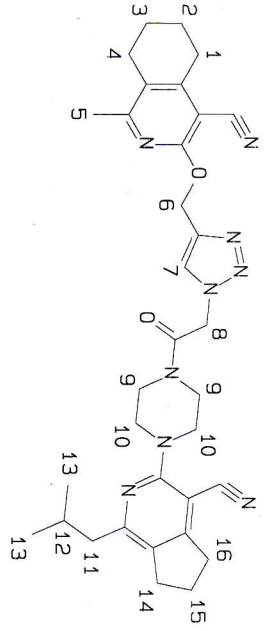

C<sub>23</sub>H<sub>29</sub>N<sub>9</sub>O<sub>2</sub>

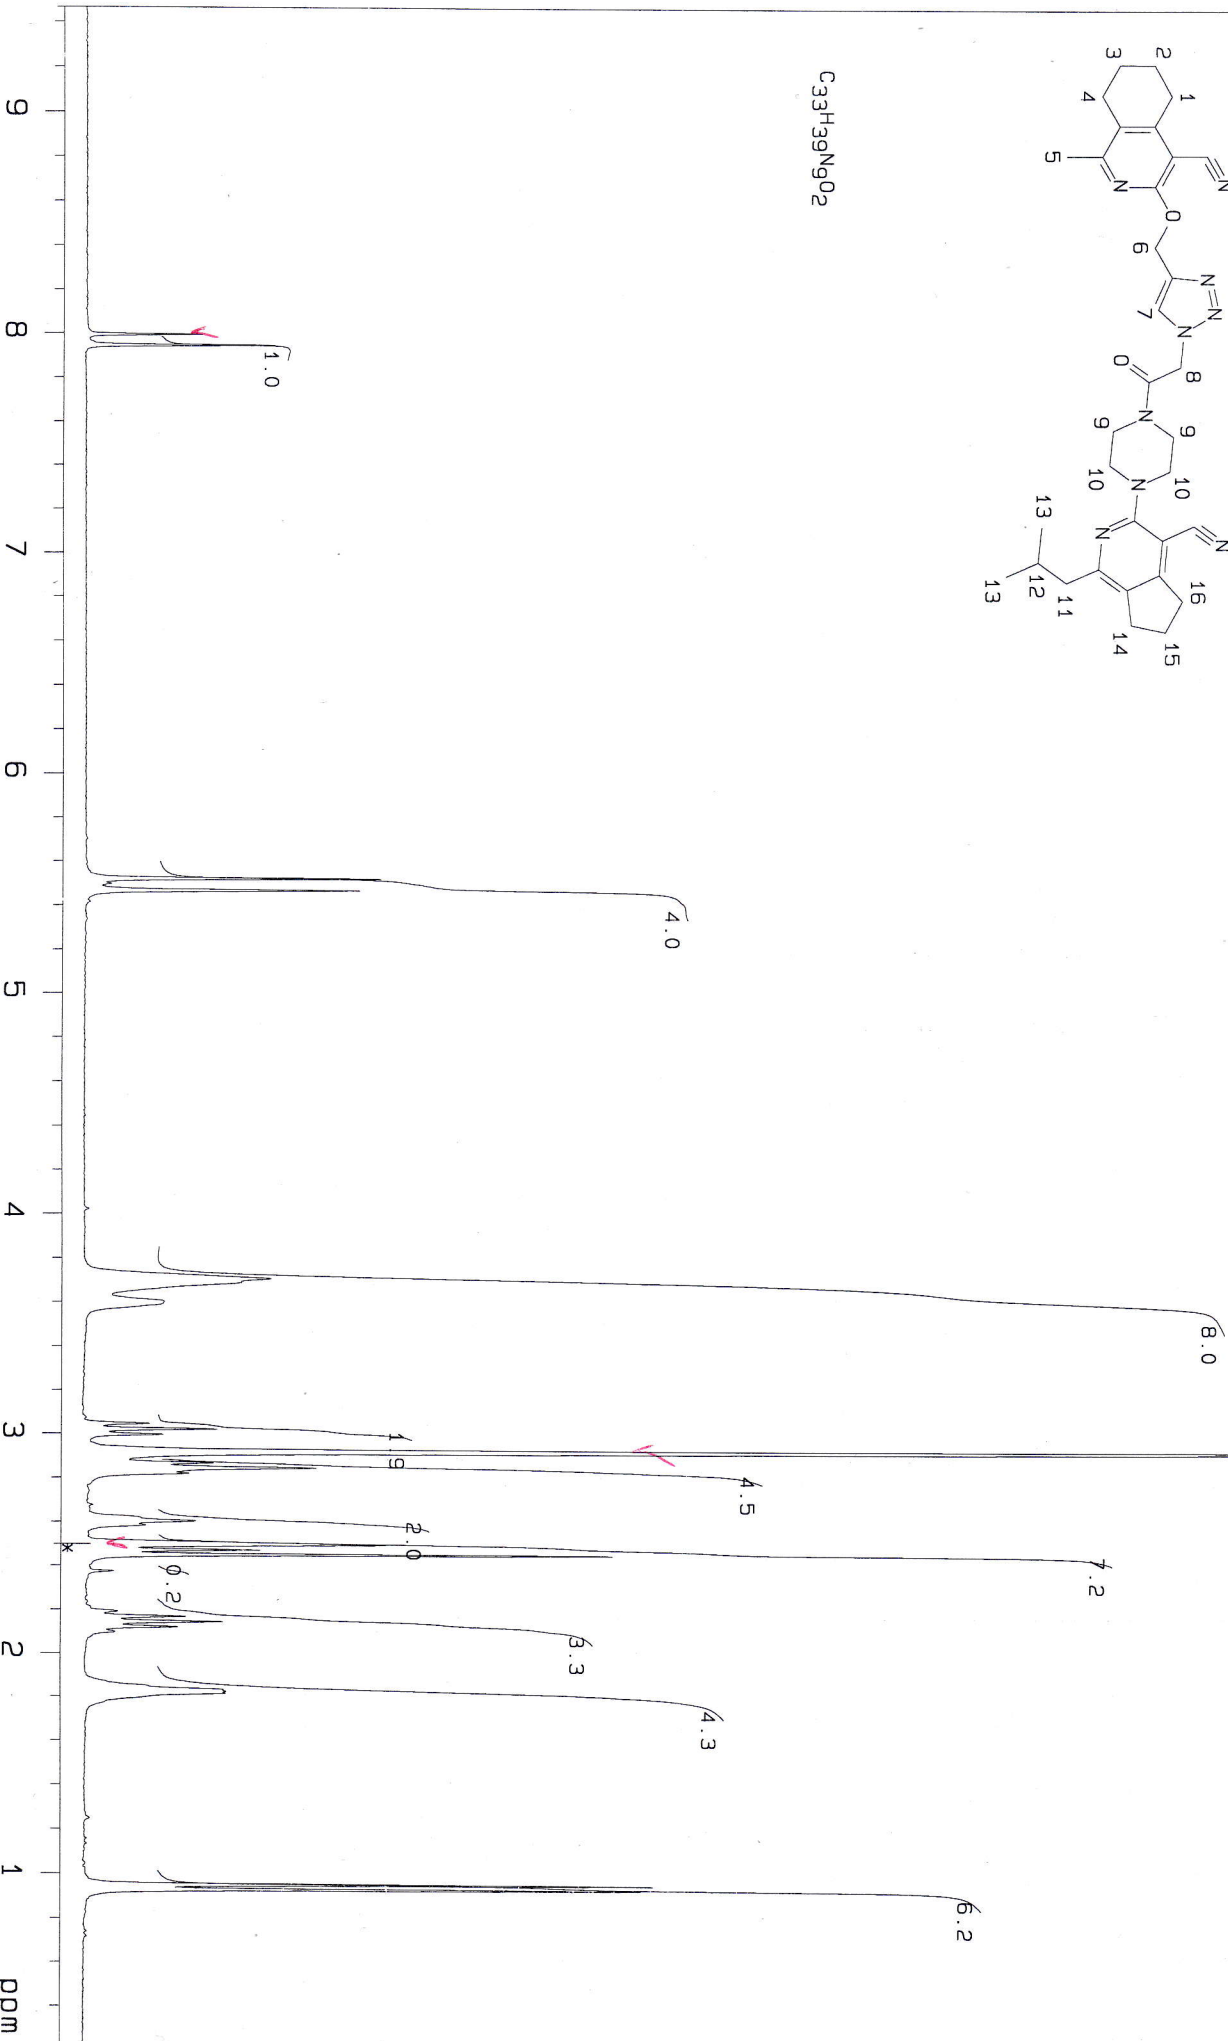

+  
[Signature]



601 Hybrid 020

Molecular Structure Research Centre, Yerevan, Armenia, Varian Mercury-300VX  
T20-146

C13 75.465 MHz, n1 = 768, np = 19998, temp = 30.0 C, lb = 1.0, solvent = DMSO/Cd4 1/3

ANUSH\_TEMA T20-146

Oct 7 2021

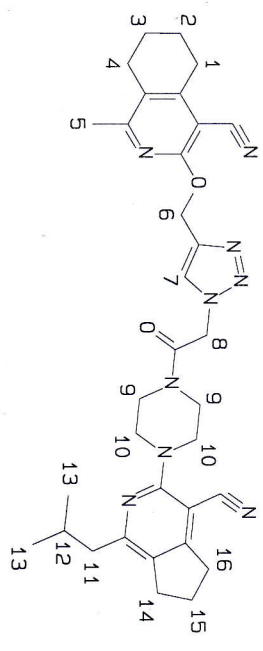

C<sub>33</sub>H<sub>39</sub>N<sub>9</sub>O<sub>2</sub>

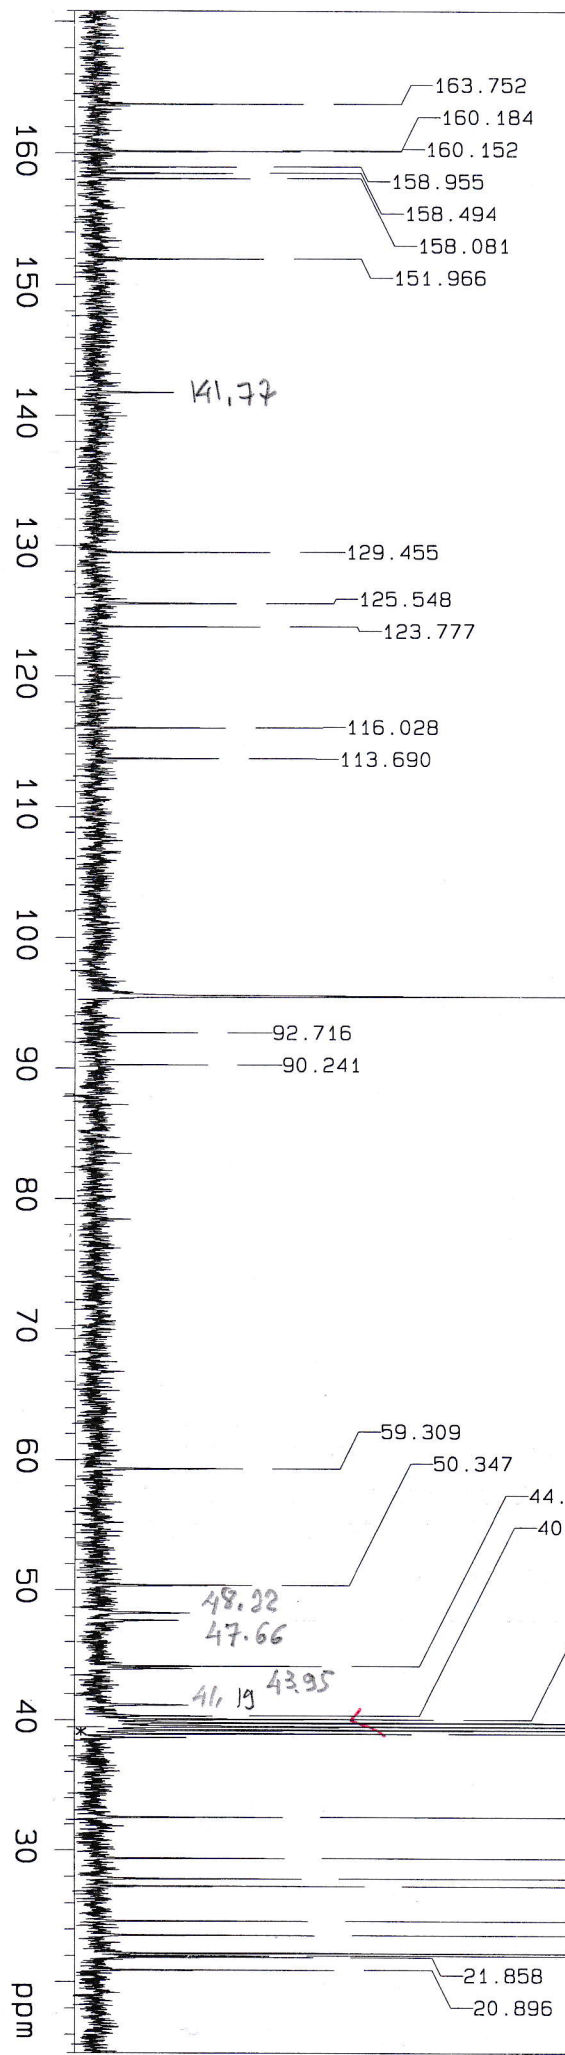

Handwritten signature and a red checkmark.

Hybrid 020

SPIN41 4 (0.407)

100

616

Scan ES+  
1.18e7

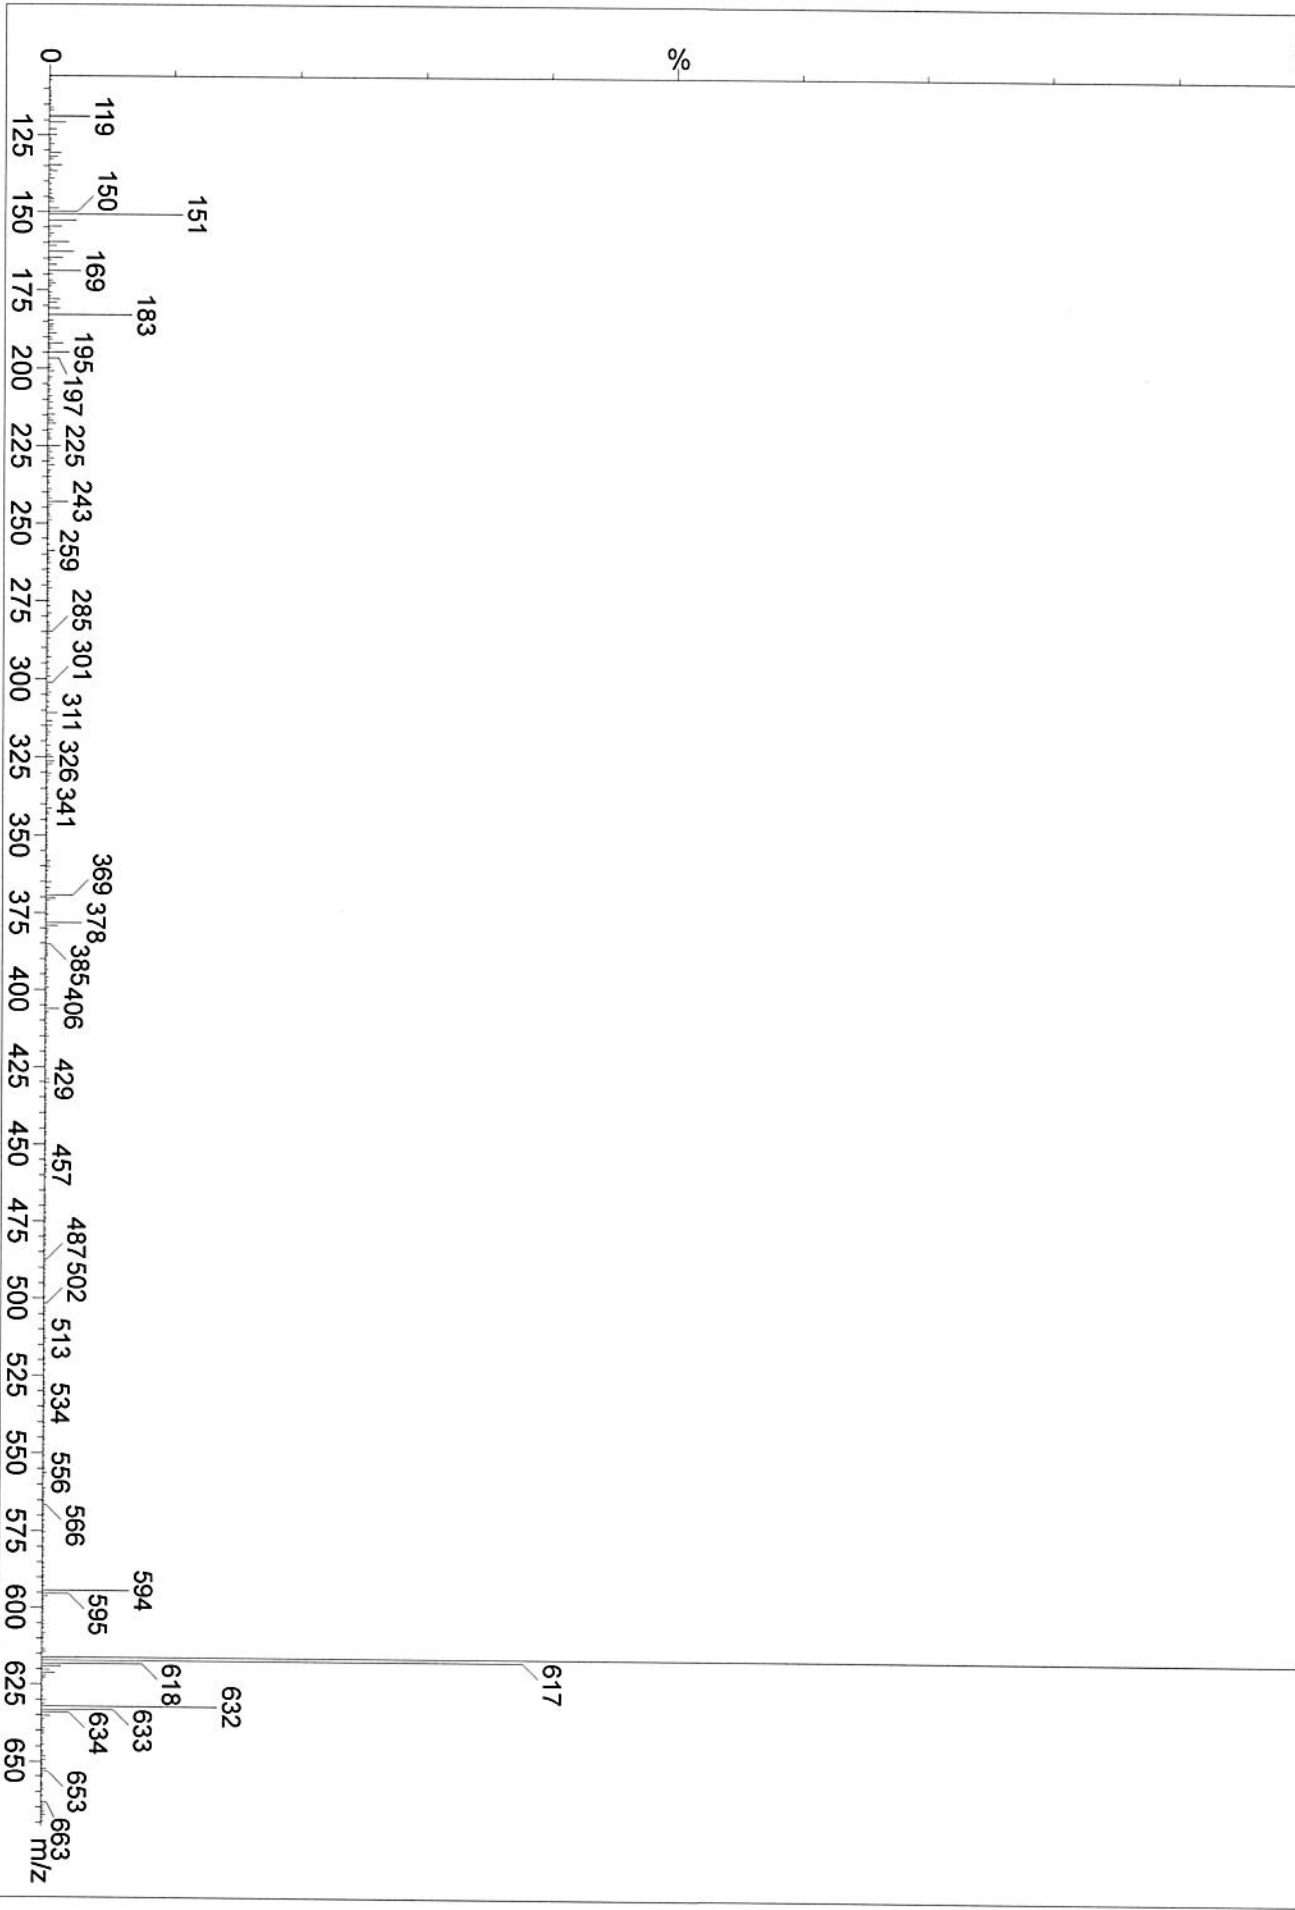

Hybrid 020

SPIN41 (0.102) Cu (0.20); Is (1.00, 1.00) C33H39N9O2Na1  
616.3124

Scan ES+  
6.72e12

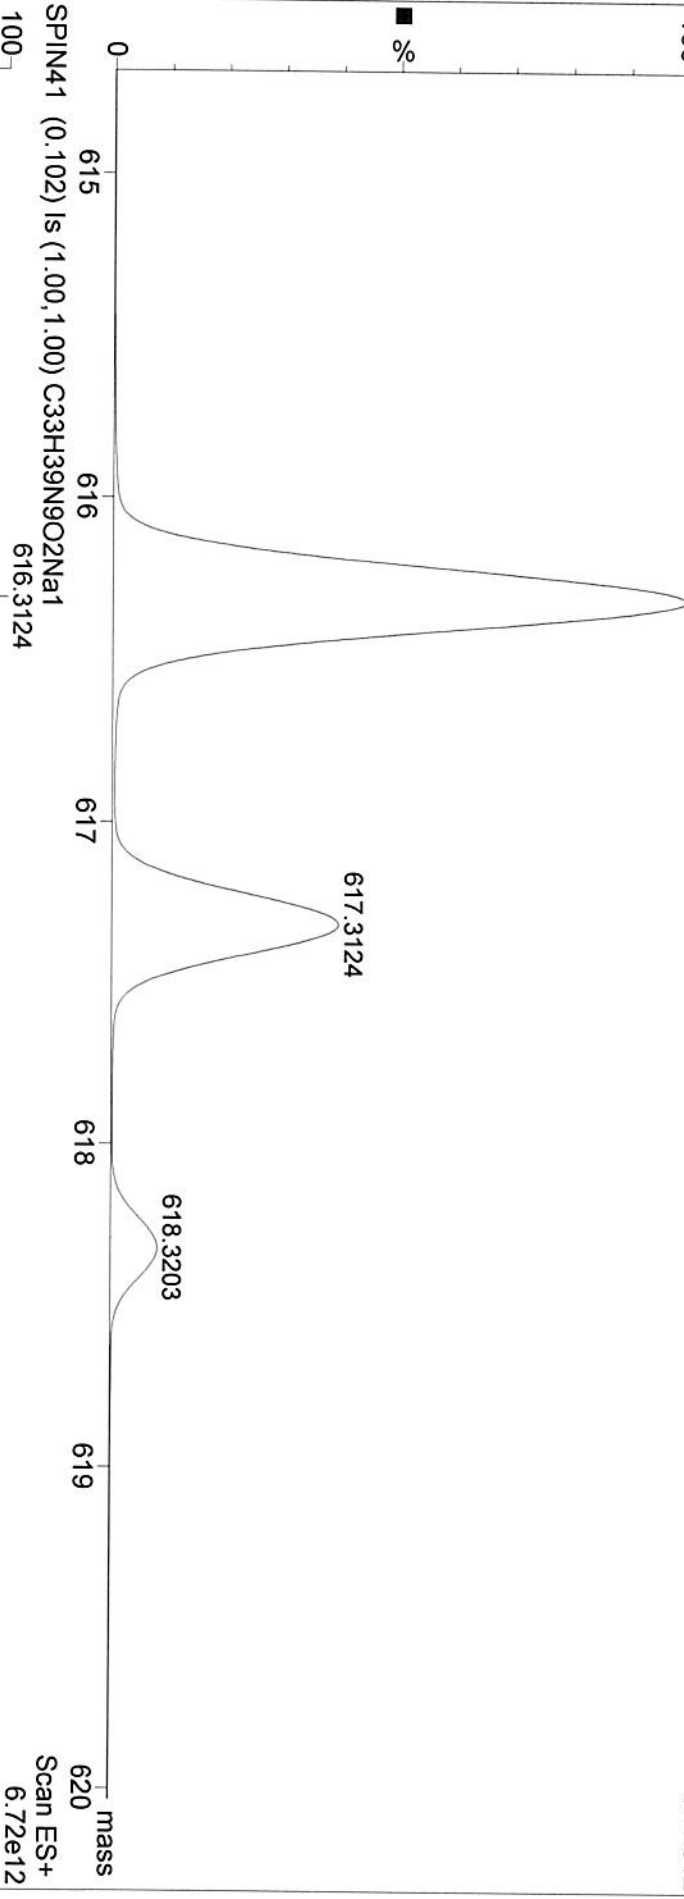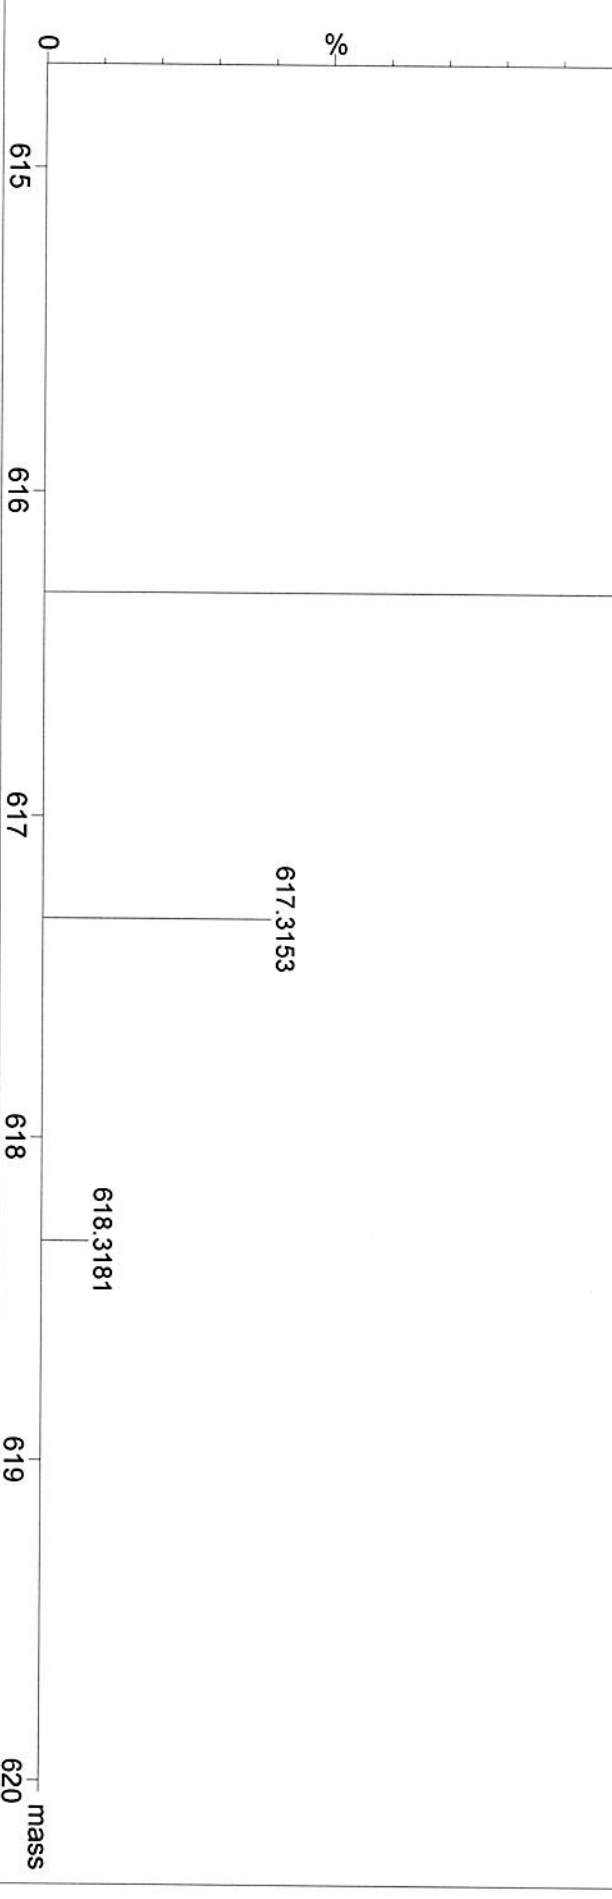

Hybrid 003 6e

Molecular Structure Research Centre, Yerevan, Armenia, Varian Mercury-300VX

H1 300.088 MHz, nt=16, rp=32000, temp=30.0 C, lb=-0.2, solvent=DMSO/CD4 1/3

HA-1008

SAMV\_19 ha-1008

Feb 15 2019

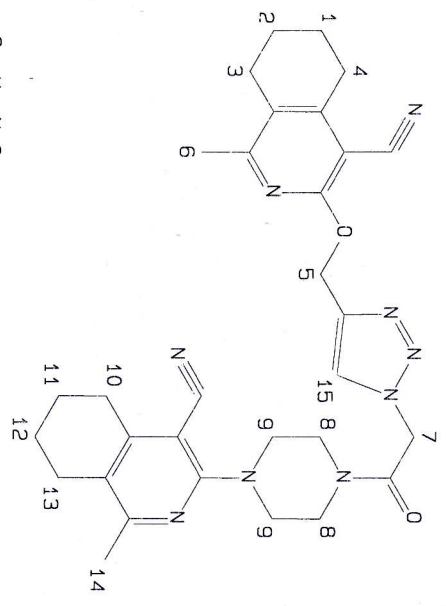

C<sub>31</sub>H<sub>35</sub>N<sub>9</sub>O<sub>2</sub>

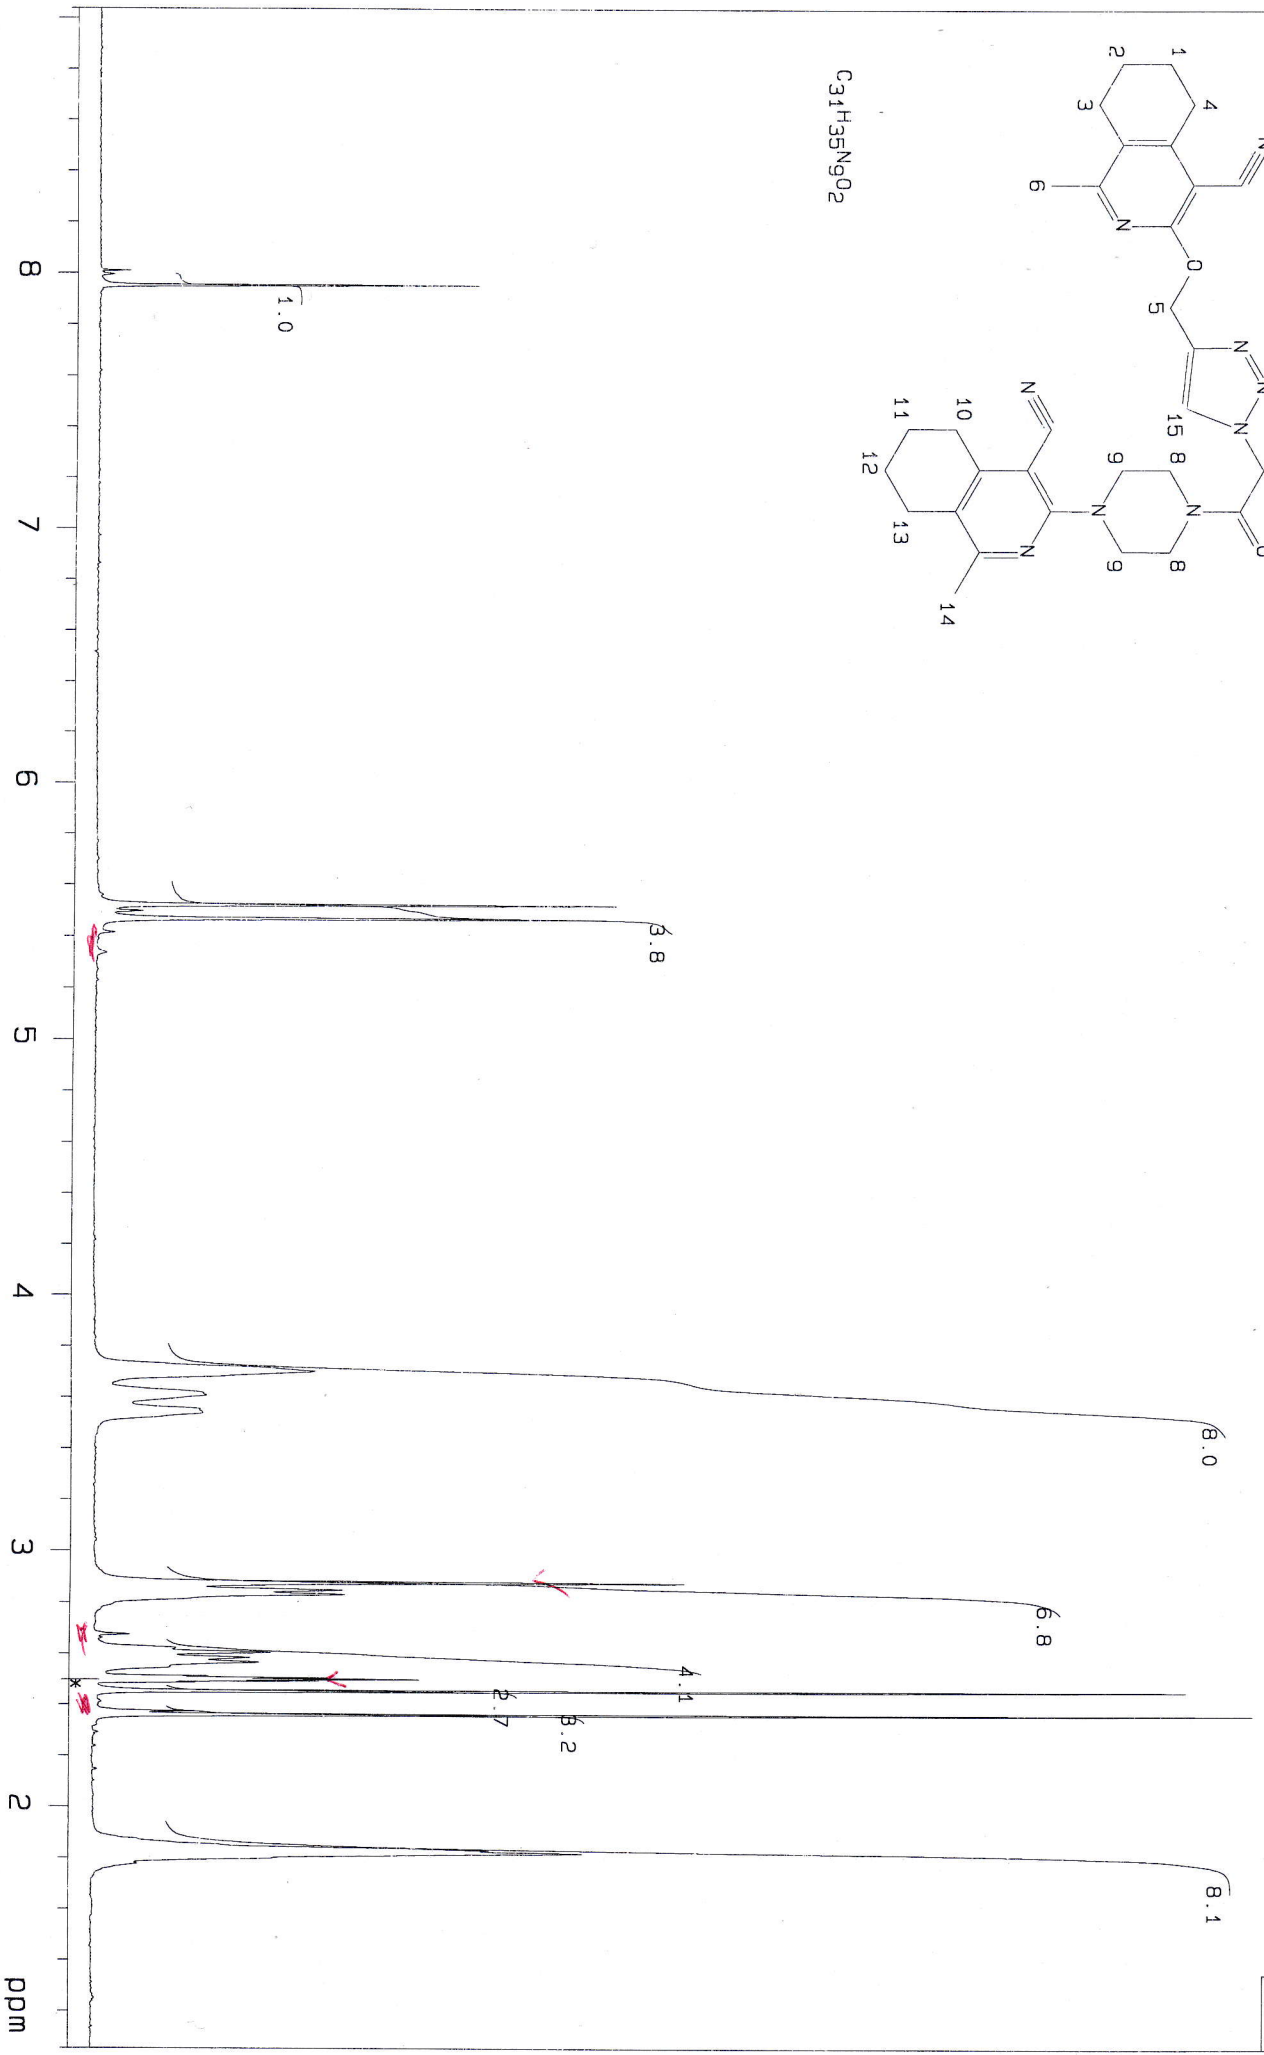

Handwritten signature

+

Hybrid 003

SPIN24 10 (1.018)

100

Scan ES+  
2.42e7

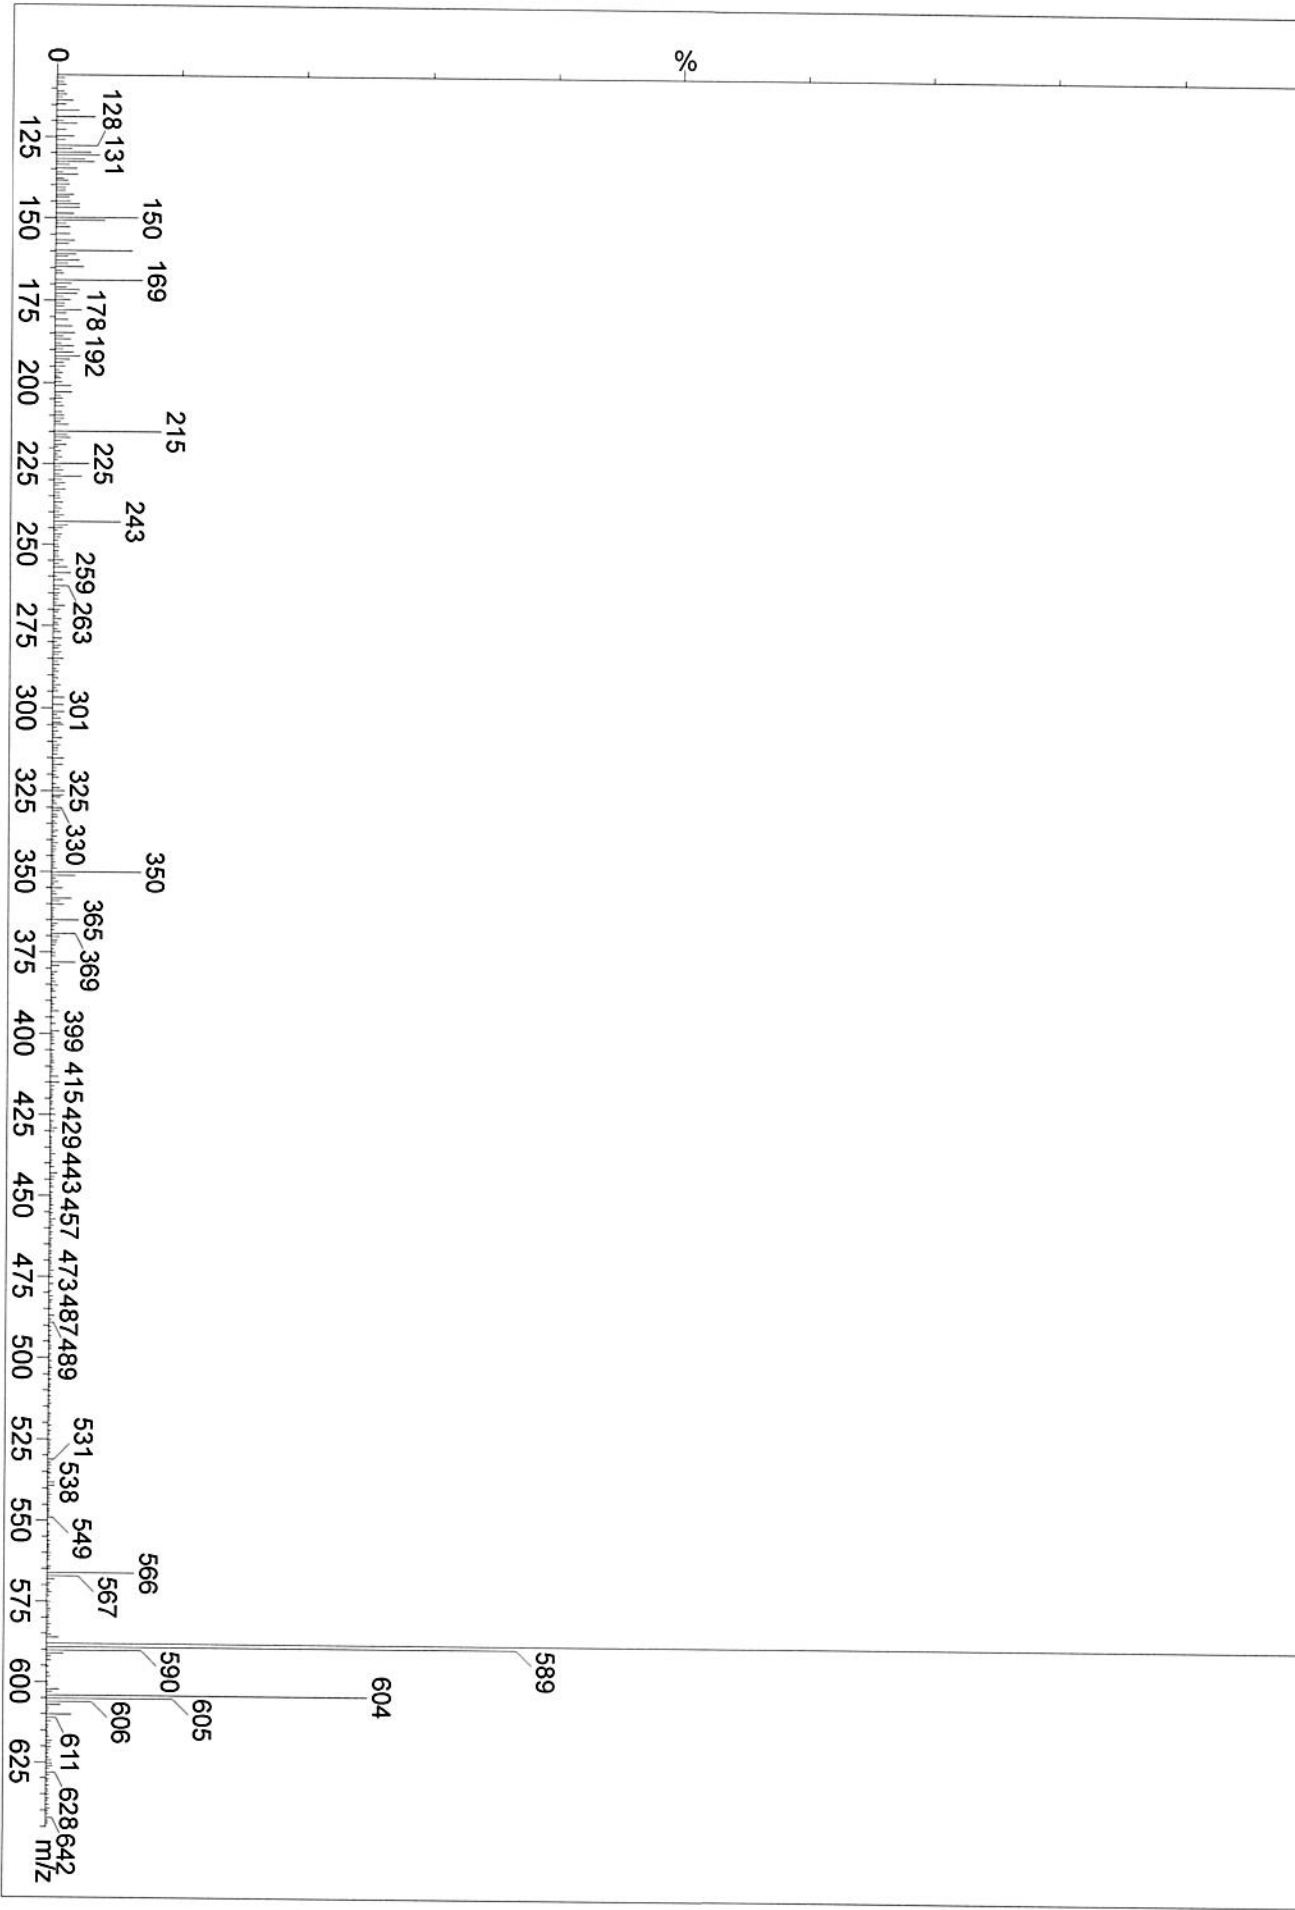

**Hybrid 003**

SPIN24 (0.102) Cu (0.20); Is (1.00,1.00) C31H35N9O2Na1

Scan ES+  
6.87e12

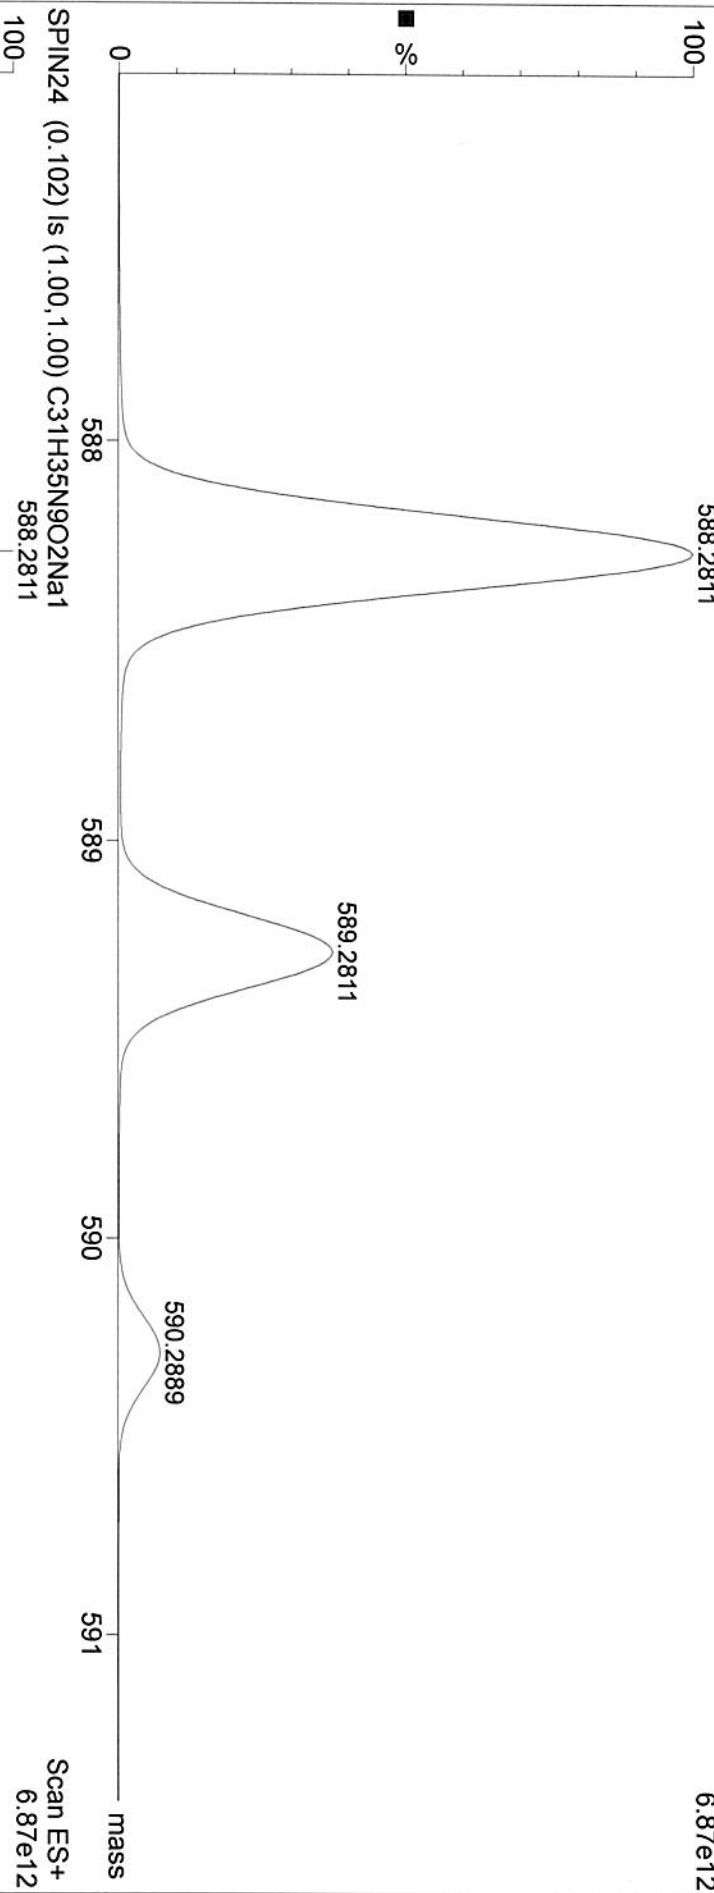

SPIN24 (0.102) Is (1.00,1.00) C31H35N9O2Na1

Scan ES+  
6.87e12

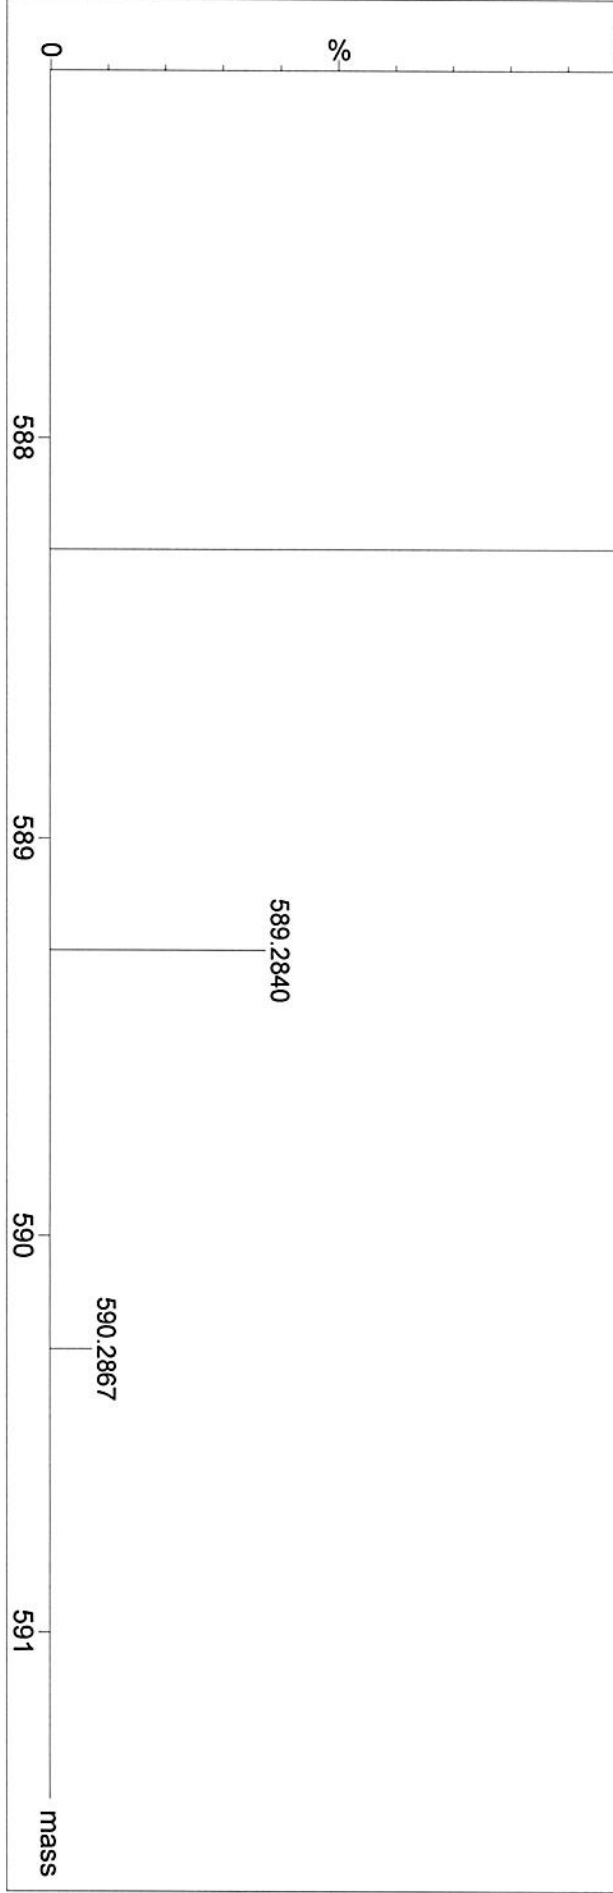



Hybrid 023 6F

T20-149

Molecular Structure Research Centre, Yerevan, Armenia, Varian Mercury-300VX

H1 300.088 MHz, nt = 16, np = 32000, temp = 30.0 C, lb = -0.2, solvent = DMSO-CD3 1/3

ANUSH\_TEMA F20-149

Oct 25 2021

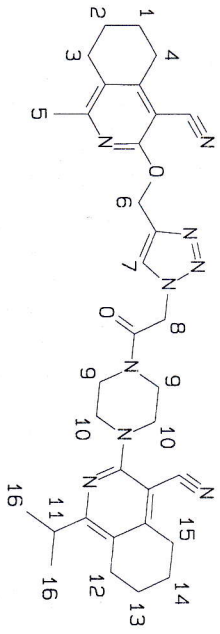

C<sub>33</sub>H<sub>39</sub>N<sub>9</sub>O<sub>2</sub>

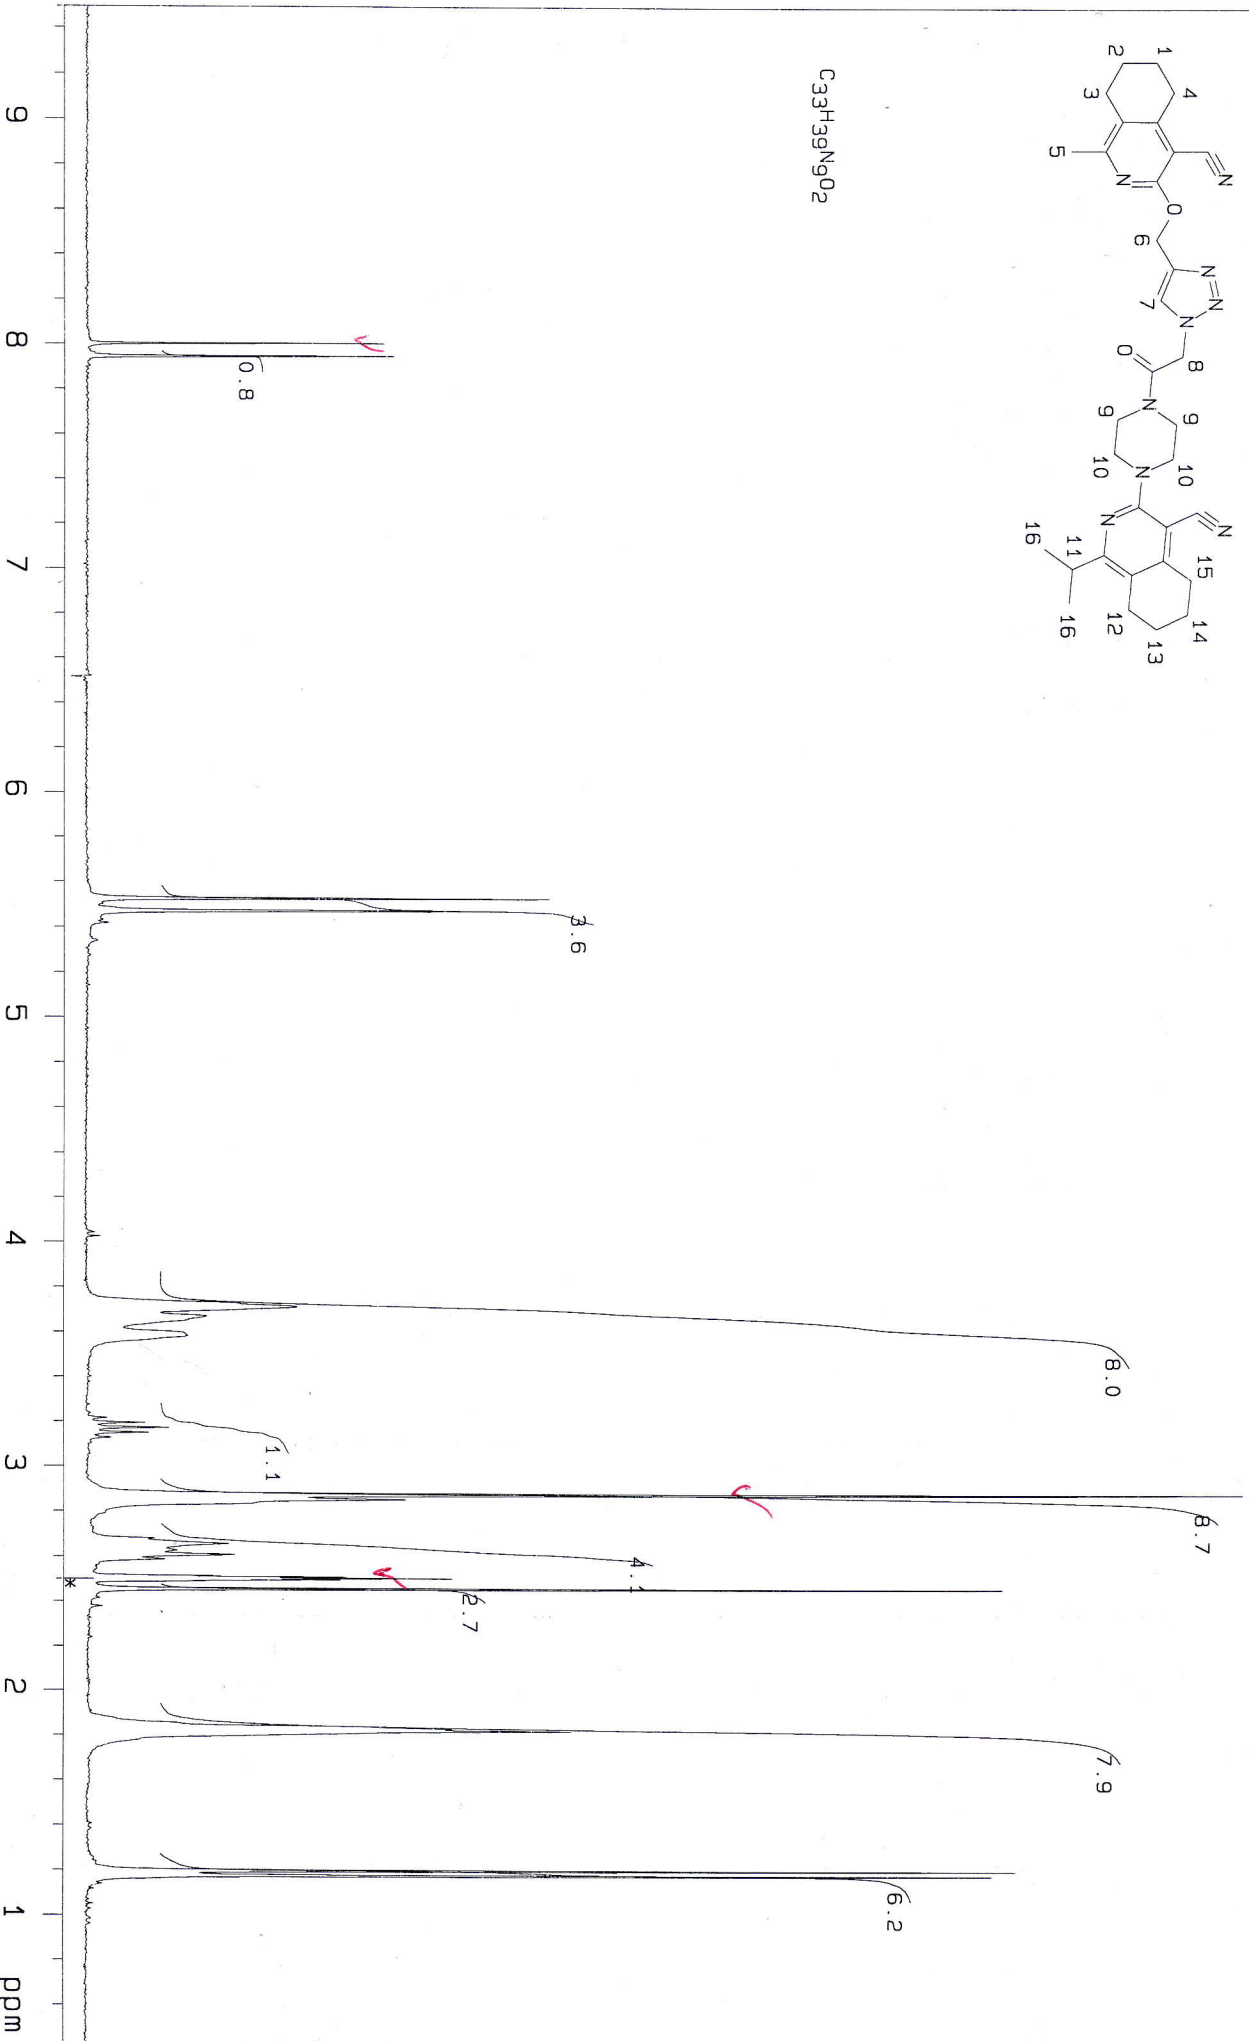

+ [Signature]

Molecular Structure Research Centre, Yerevan, Armenia, Varian Mercury-300VX  
T20-149

C13 75.465 MHz, nt = 752, np = 19998, temp = 30.0 C, lb = 1.0, solvent = DMSO

ANUSH\_TEMA f20-149

Oct 25 2021

GF Hybrid-023

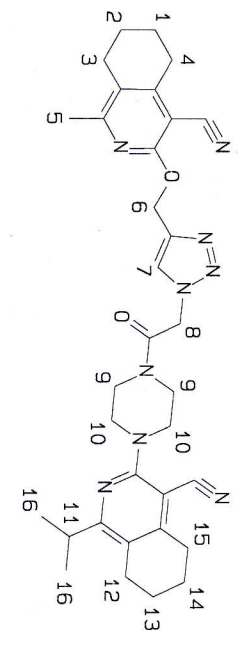

C<sub>33</sub>H<sub>39</sub>N<sub>9</sub>O<sub>2</sub>

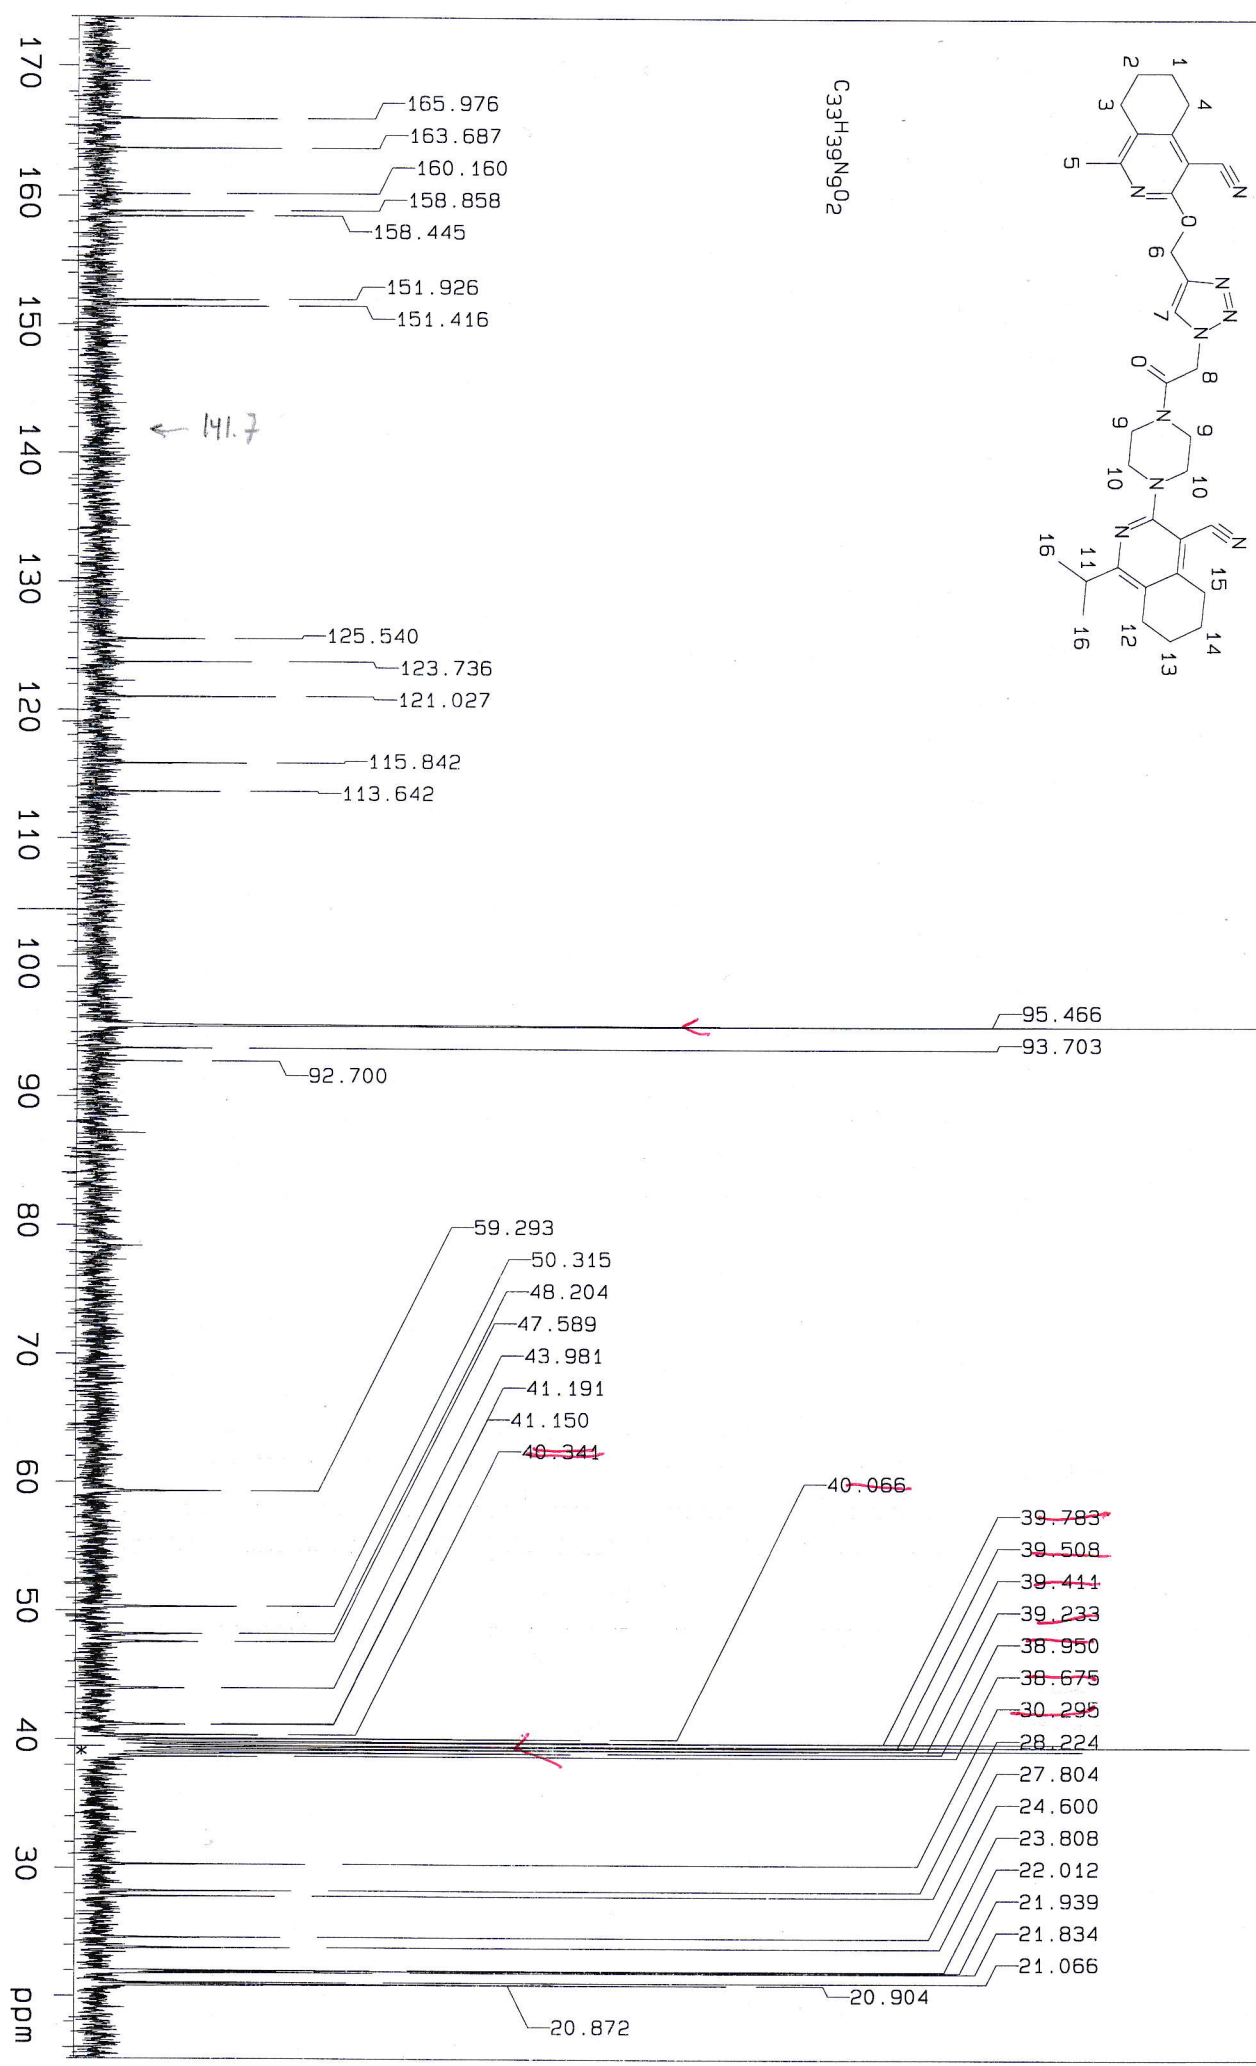

+  
[Signature]

Hybrid 023

SPIN44 7 (0.713)

100

616

Scan ES+  
7.86e6

%

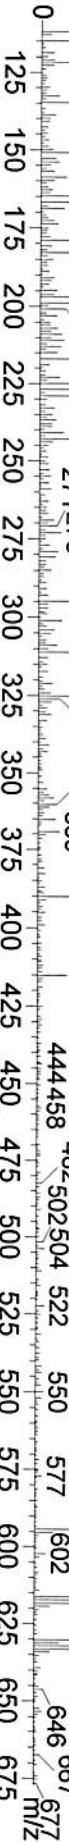

**Hybrid 023**

SPIN44 (0.102) Cu (0.20); Is (1.00,1.00) C33H39N9O2Na1

616.3124

Scan ES+  
6.72e12

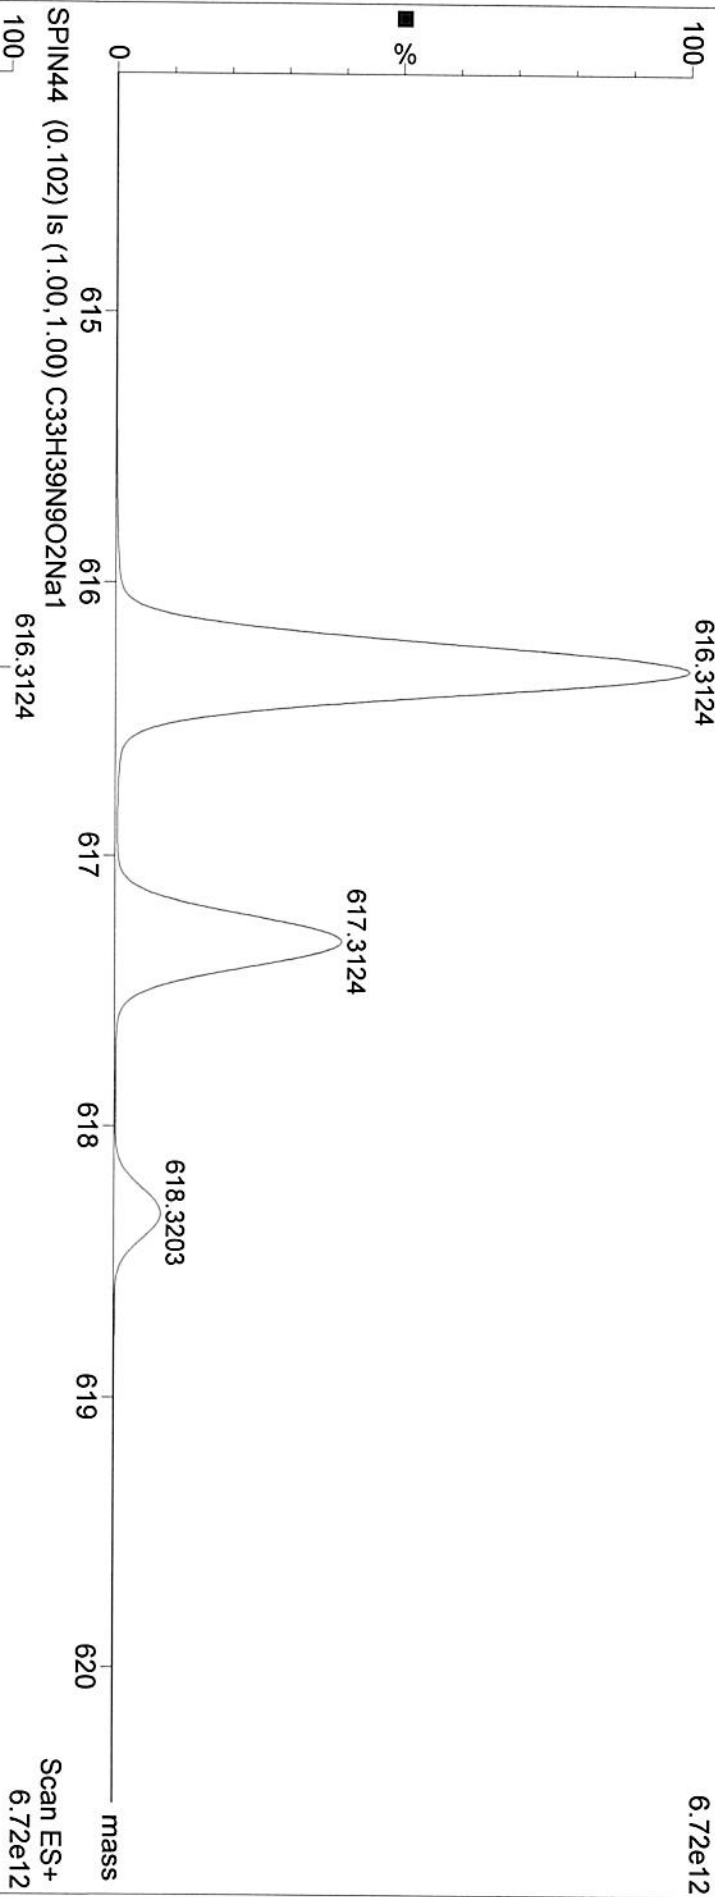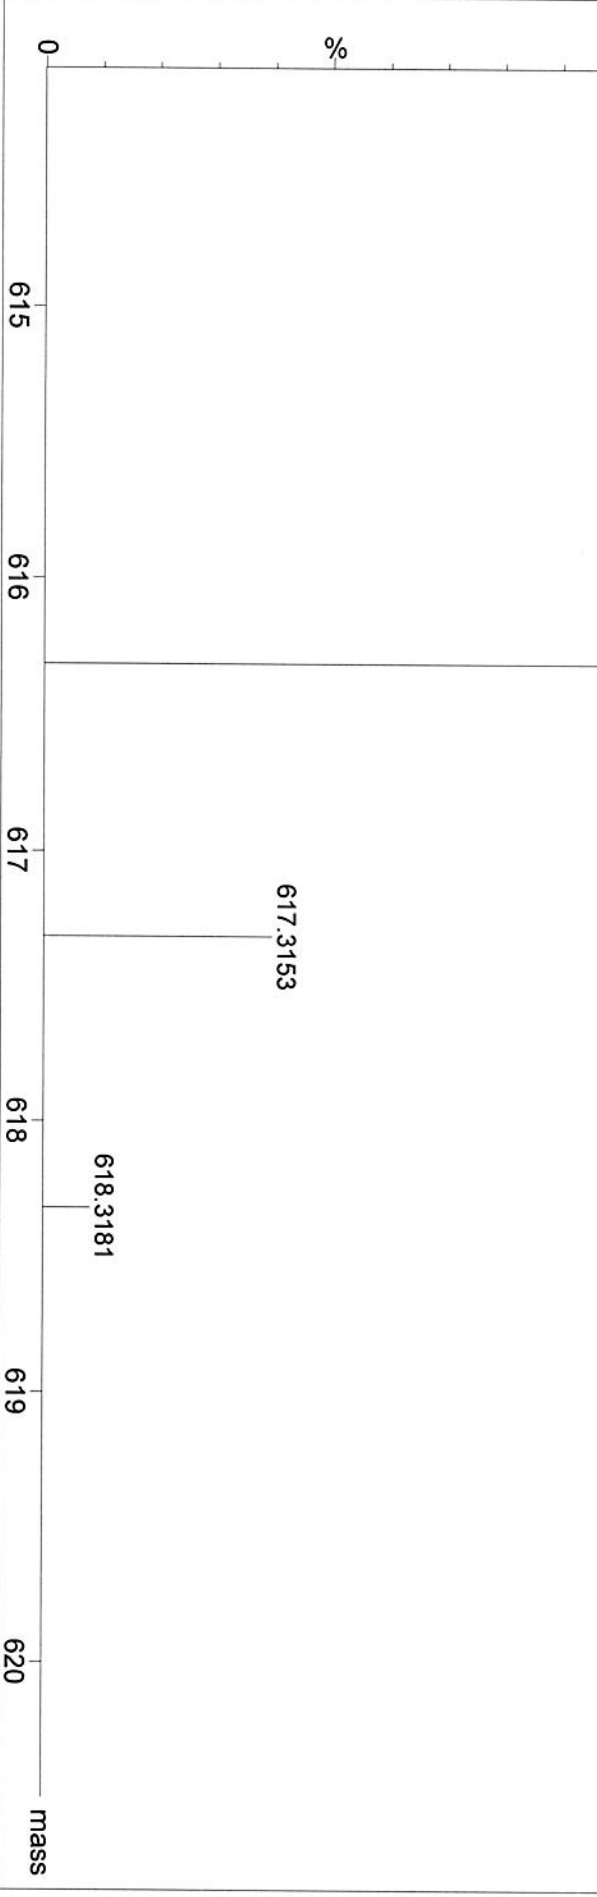

Hybrid 022 68

Molecular Structure Research Centre, Yerevan, Armenia, Varian Mercury-300VX

H1 300.088 MHz, nt=16, np=32000, temp=30.0 C, lb=-0.2, solvent=DMSO/CCL4 1/3

T20-148

ANUSH\_TEMA t20-148

Oct 21 2021

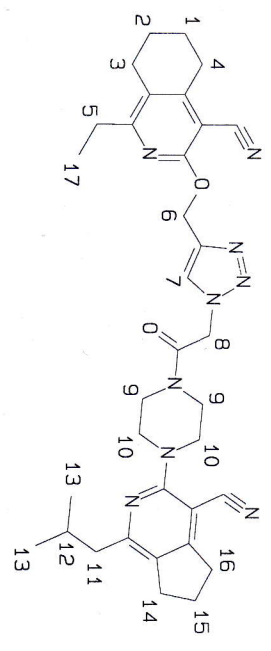

C<sub>34</sub>H<sub>41</sub>N<sub>9</sub>O<sub>2</sub>

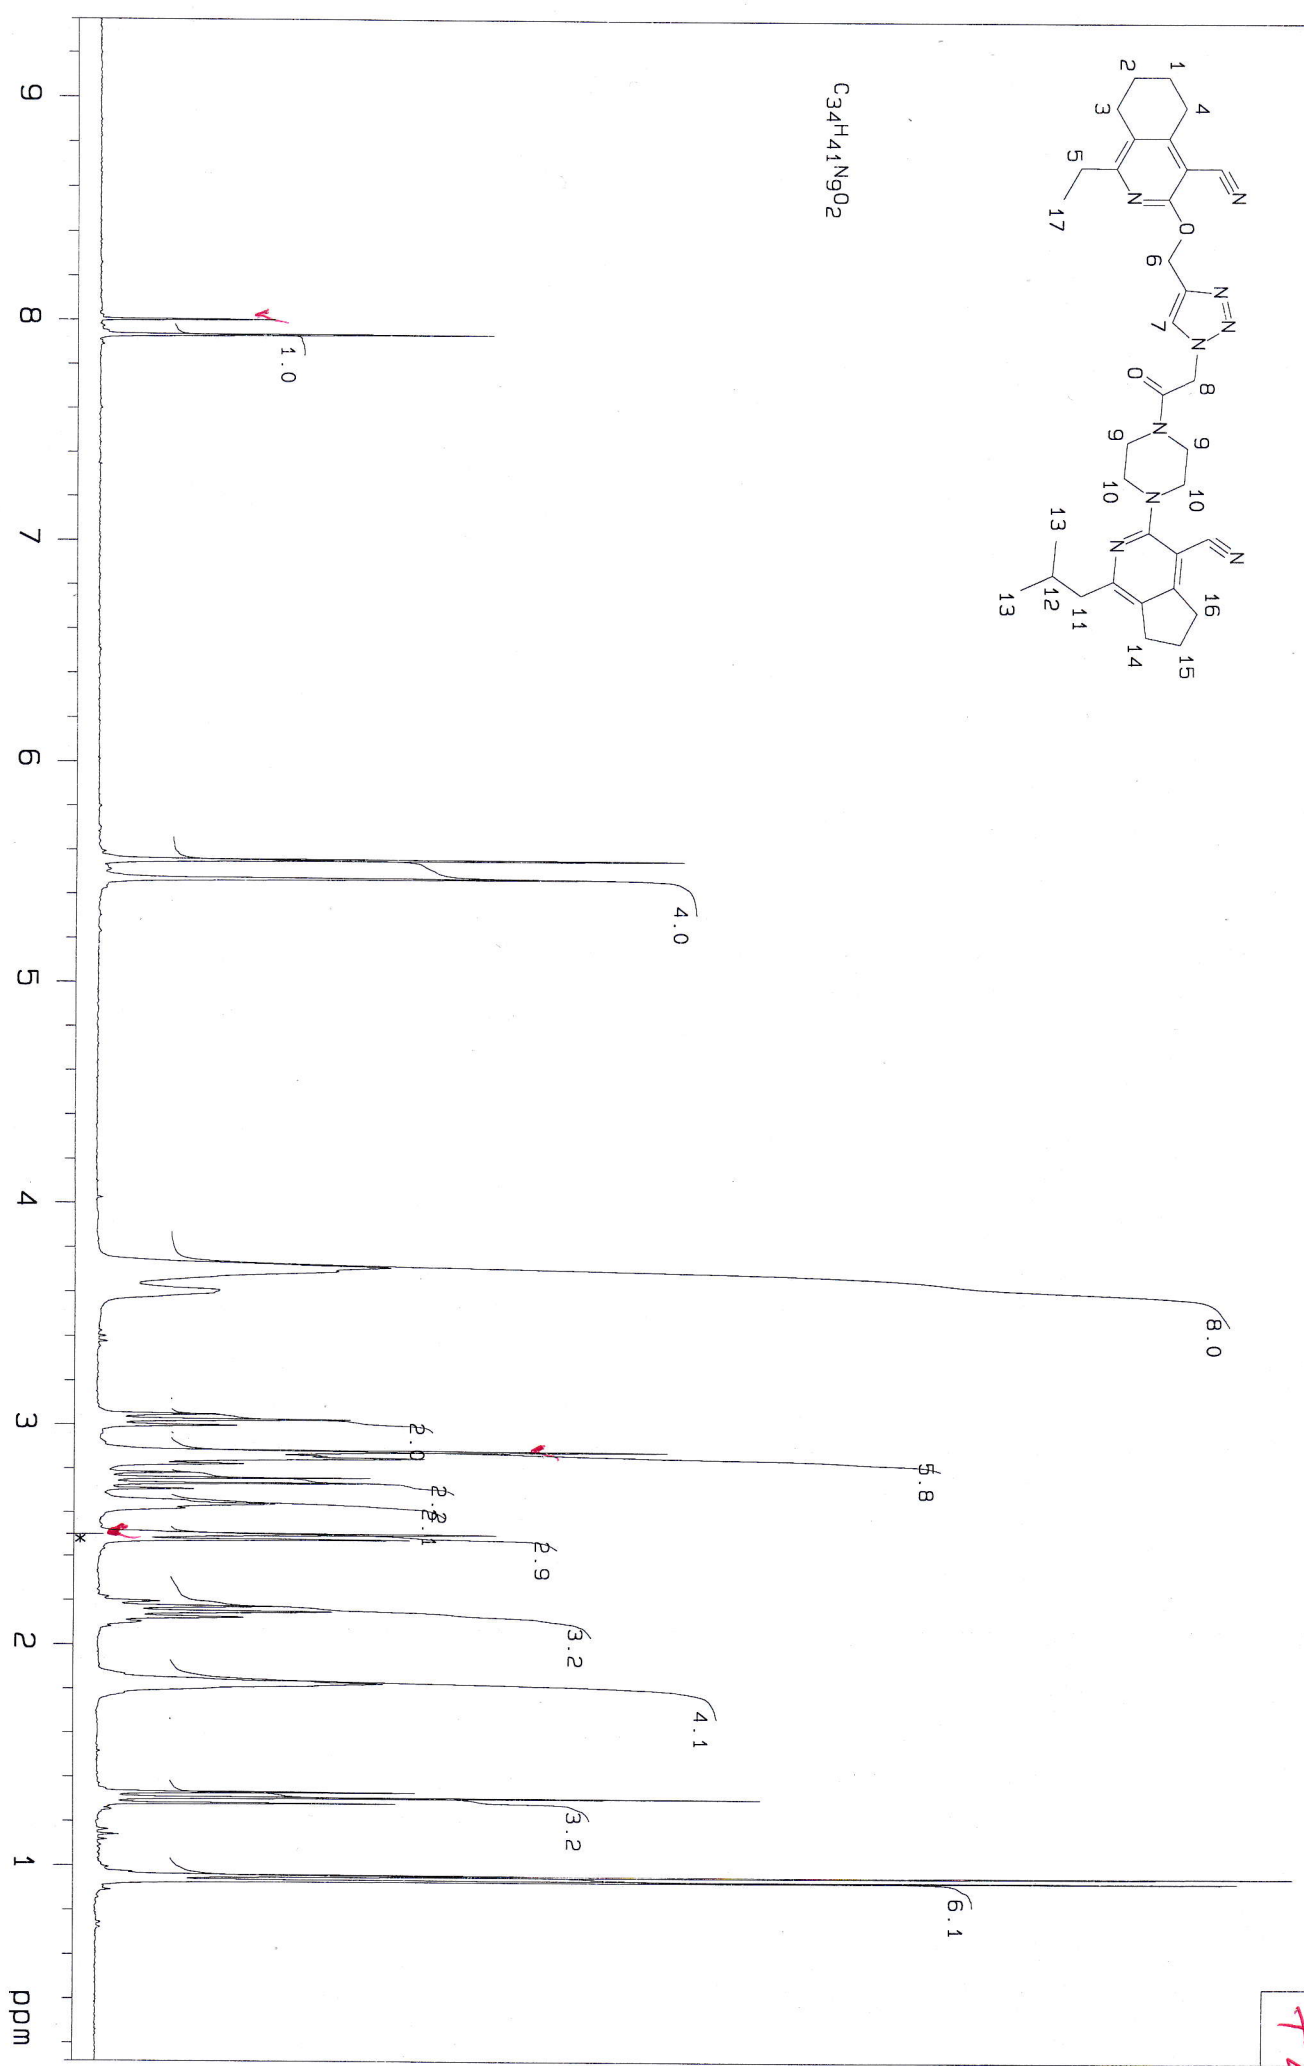

+

68 Hybrid 022

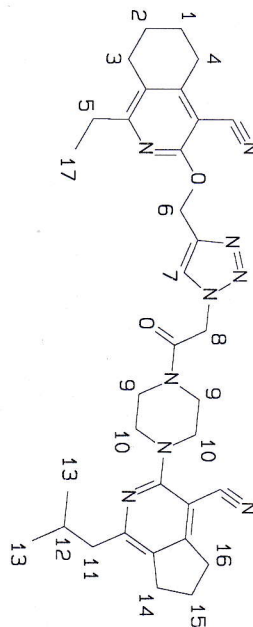

C<sub>34</sub>H<sub>41</sub>N<sub>9</sub>O<sub>2</sub>

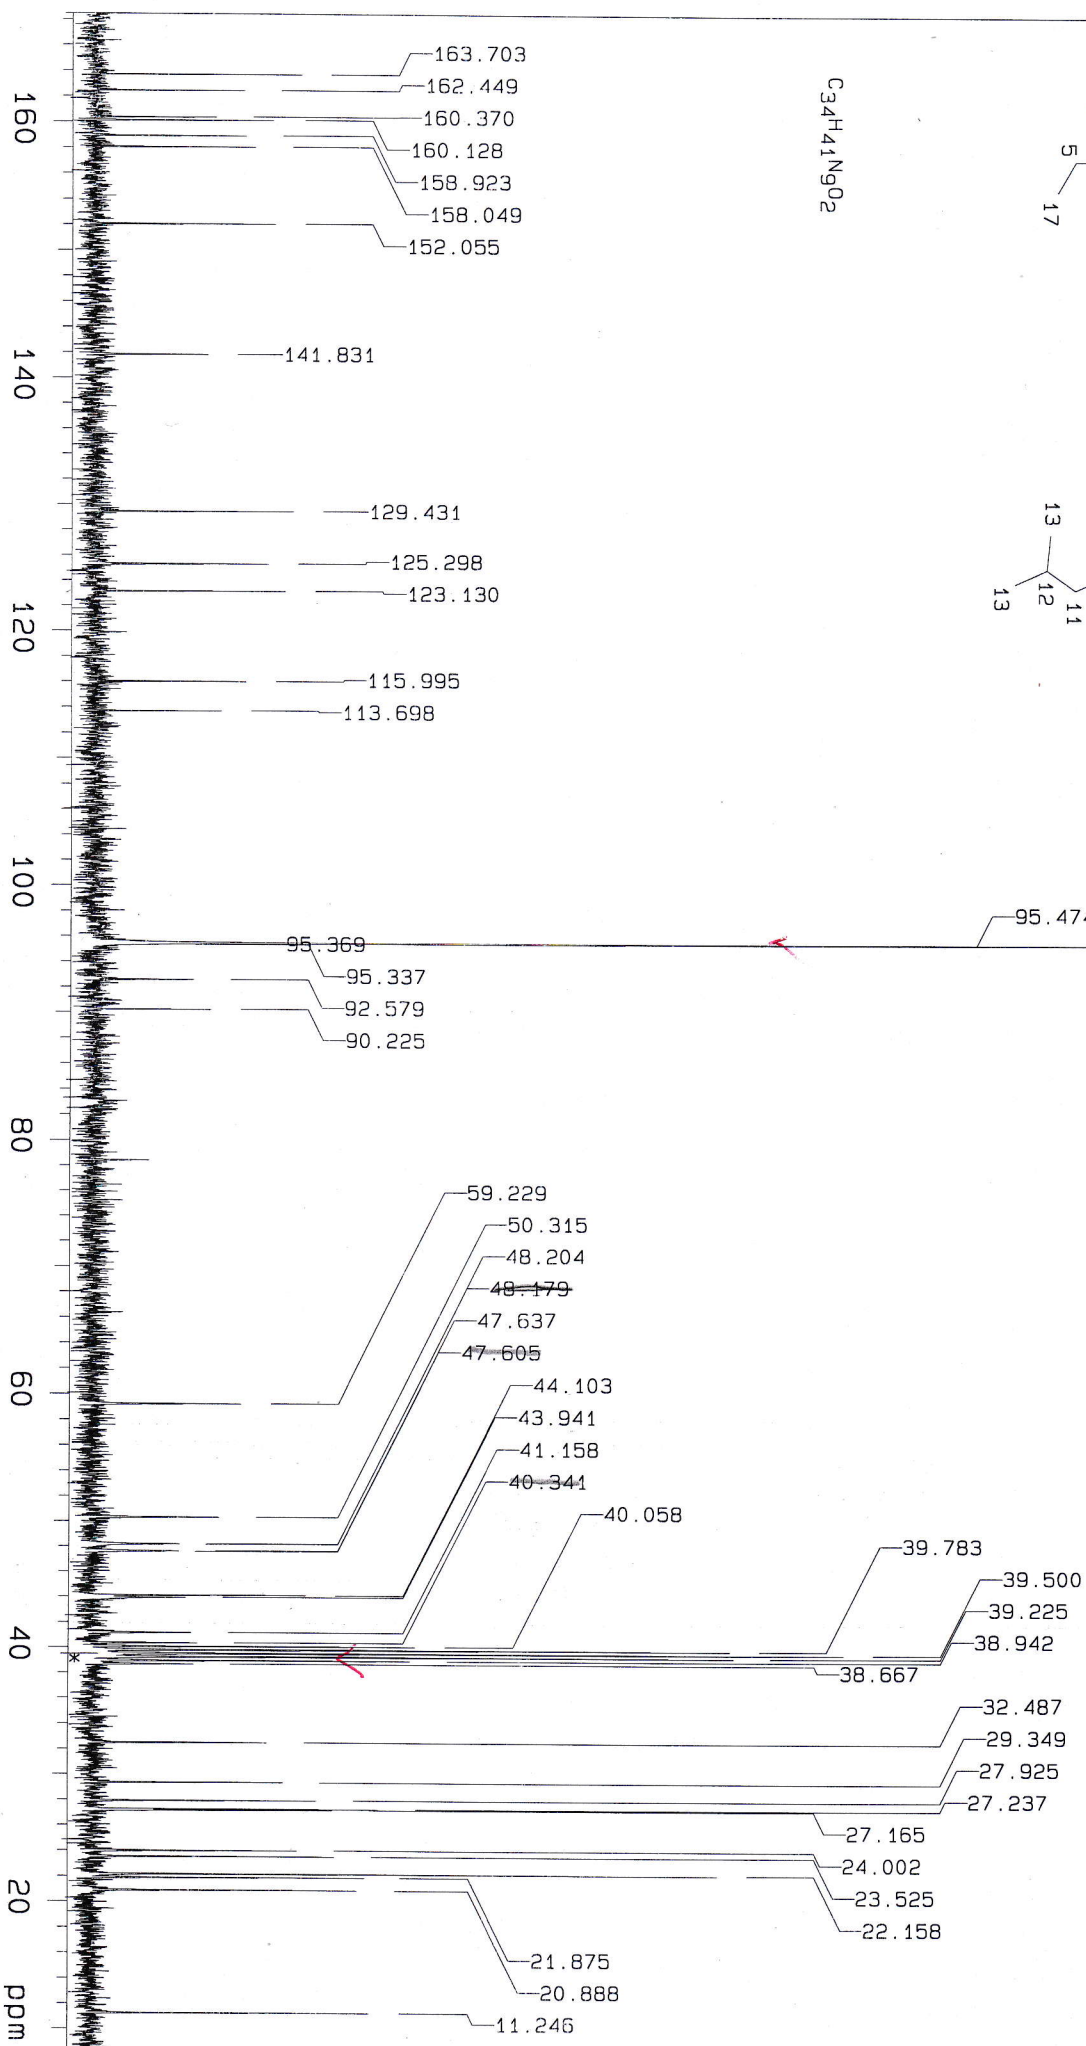

+ [Signature]



Hybrid 022  
SPIN43 6 (0.611)

100

Scan ES+  
6.56e6

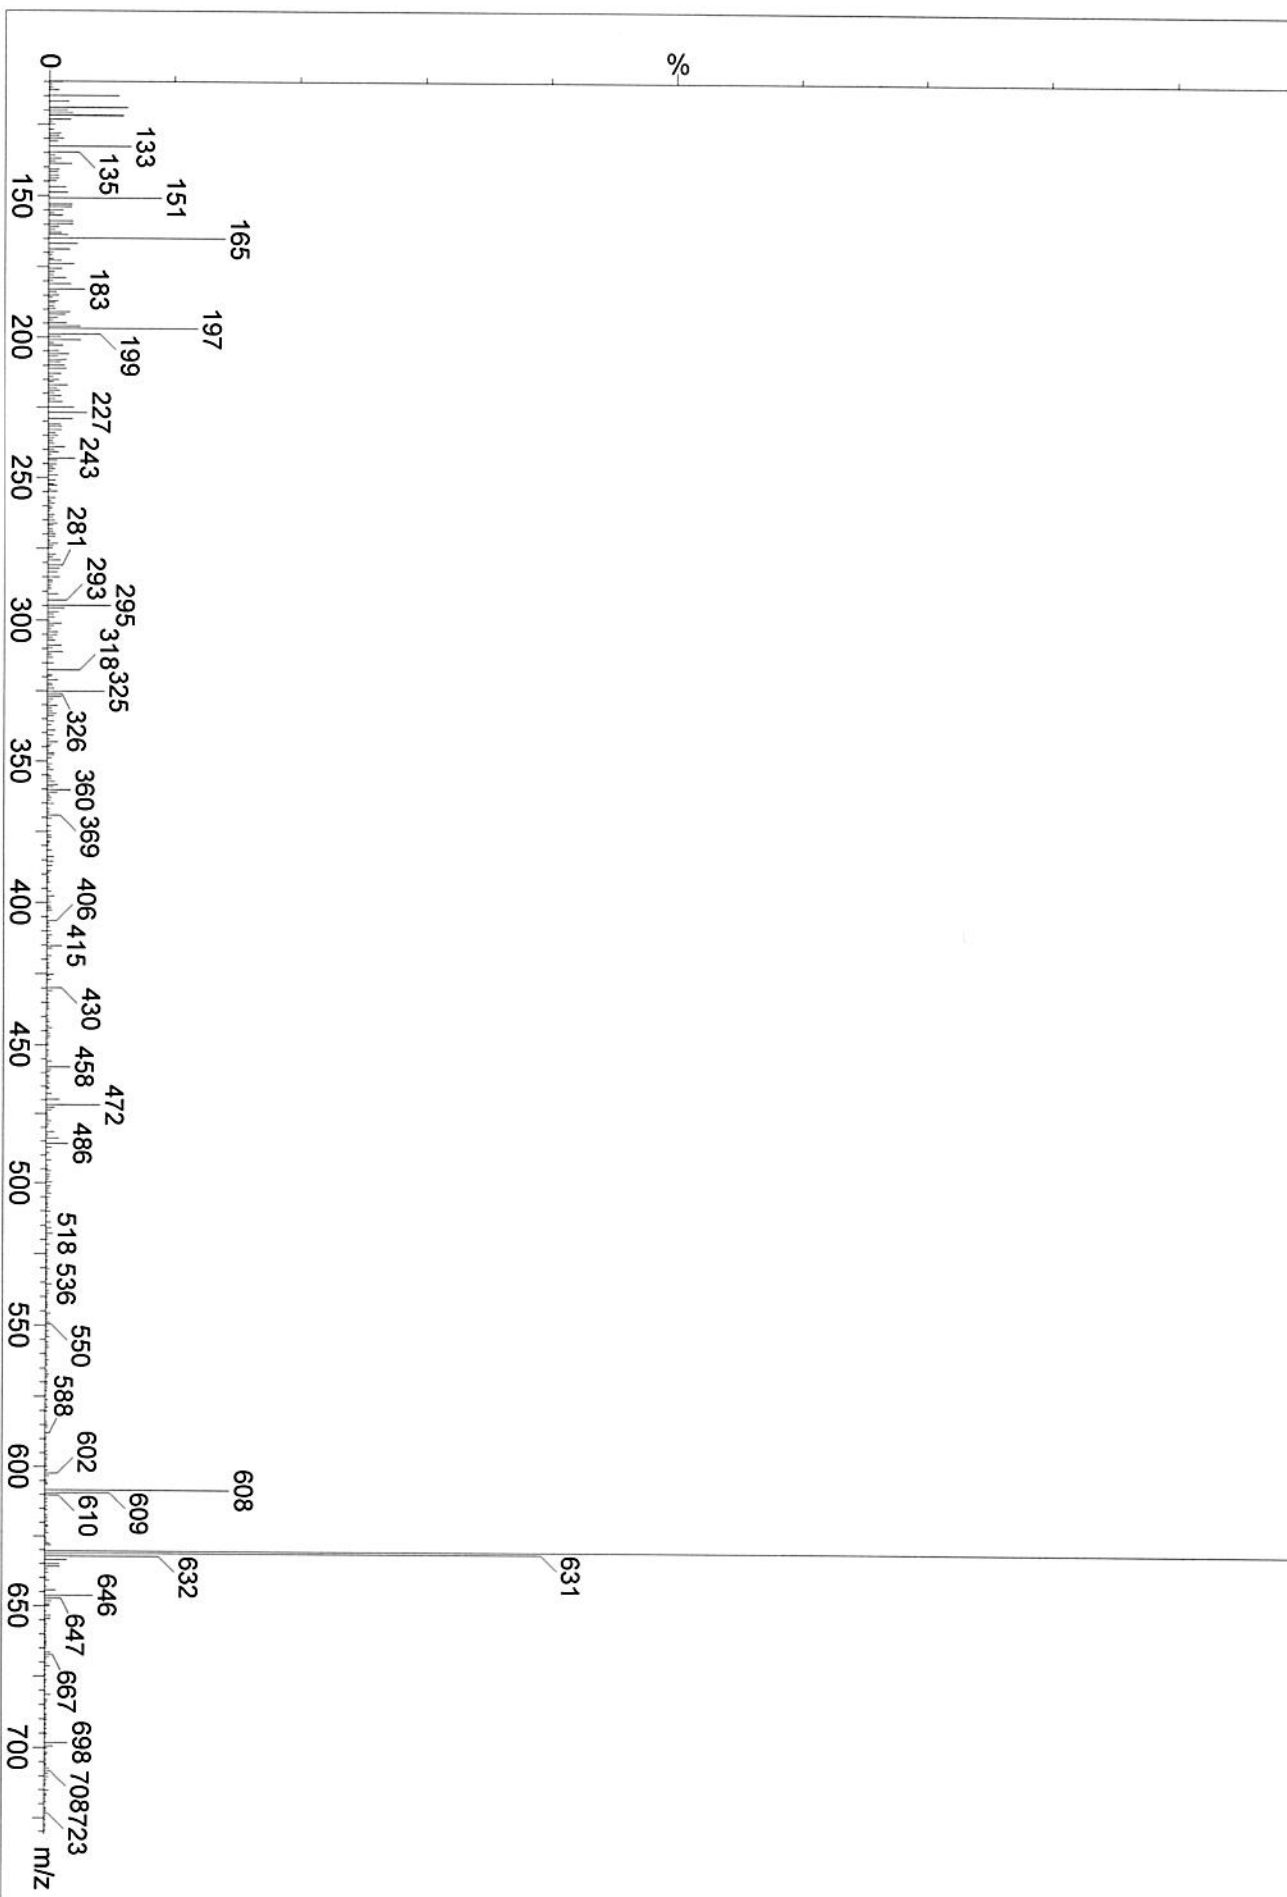

Hybrid 022

SPIN43 (0.102) Cu (0.20); Is (1.00,1.00) C34H41N9O2Na1

Scan ES+  
6.65e12

%

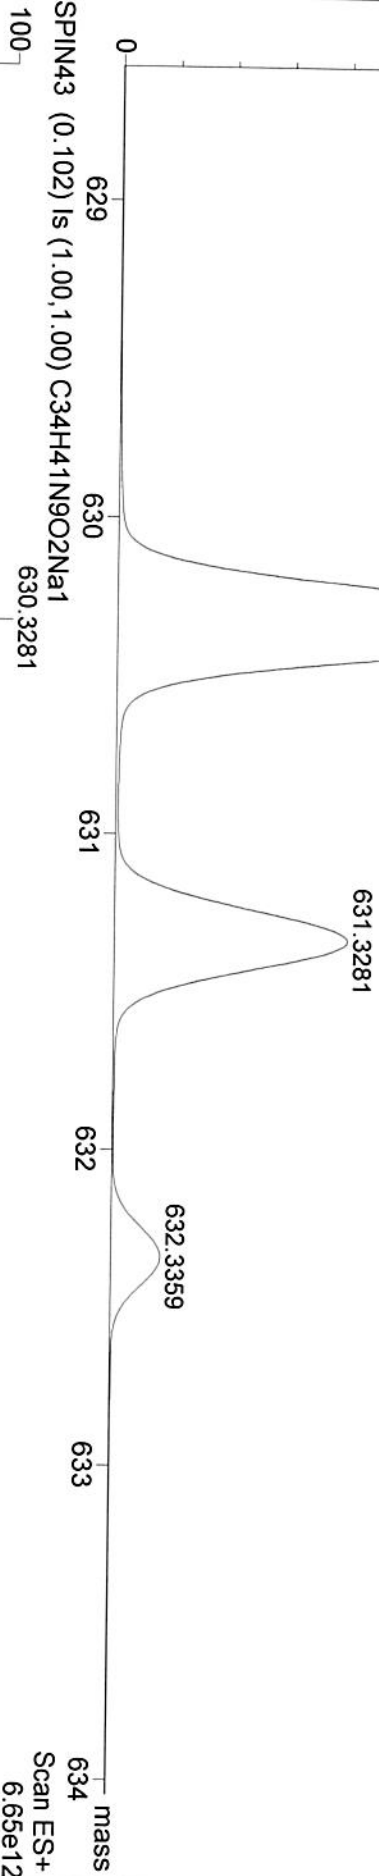

%

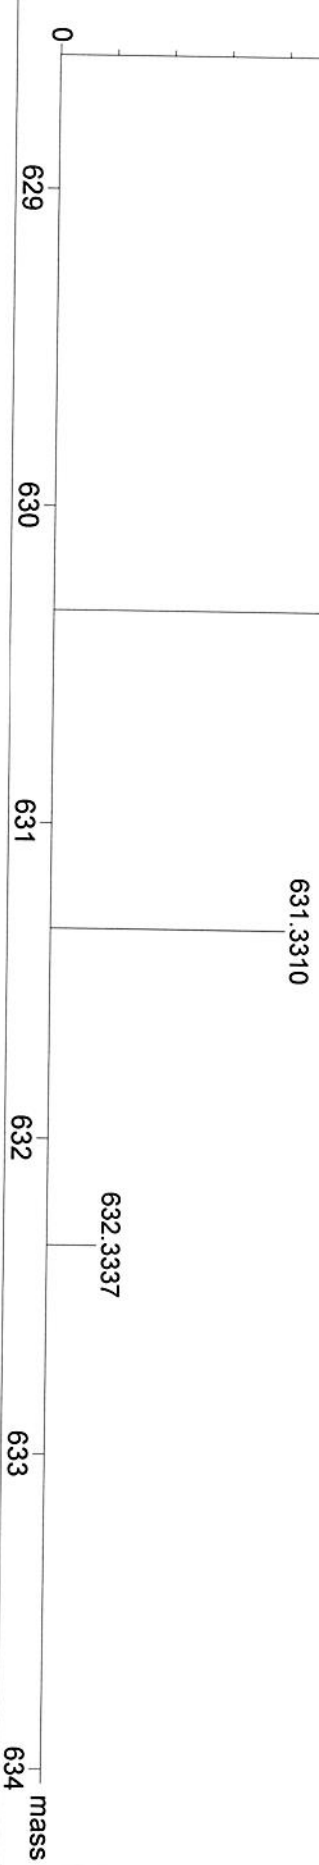

Hybrid 001

6h

Molecular Structure Research Centre, Yerevan, Armenia, Varian Mercury-300VX

H1 300.088 MHz, nt = 16, np = 32000, temp = 30.0 C, lh = -0.2, solvent = DMSO-d6

HA-1050

SAWV\_19 ha-1050

Sep 30 2019

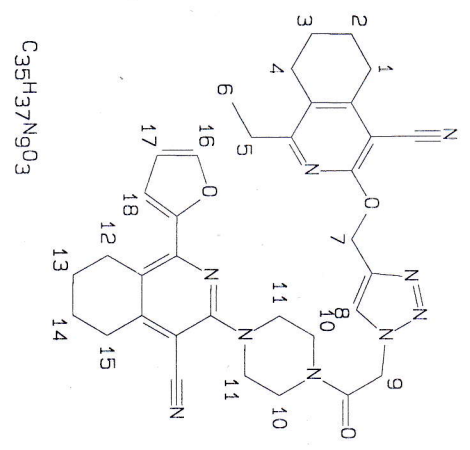

C<sub>35</sub>H<sub>37</sub>N<sub>9</sub>O<sub>3</sub>

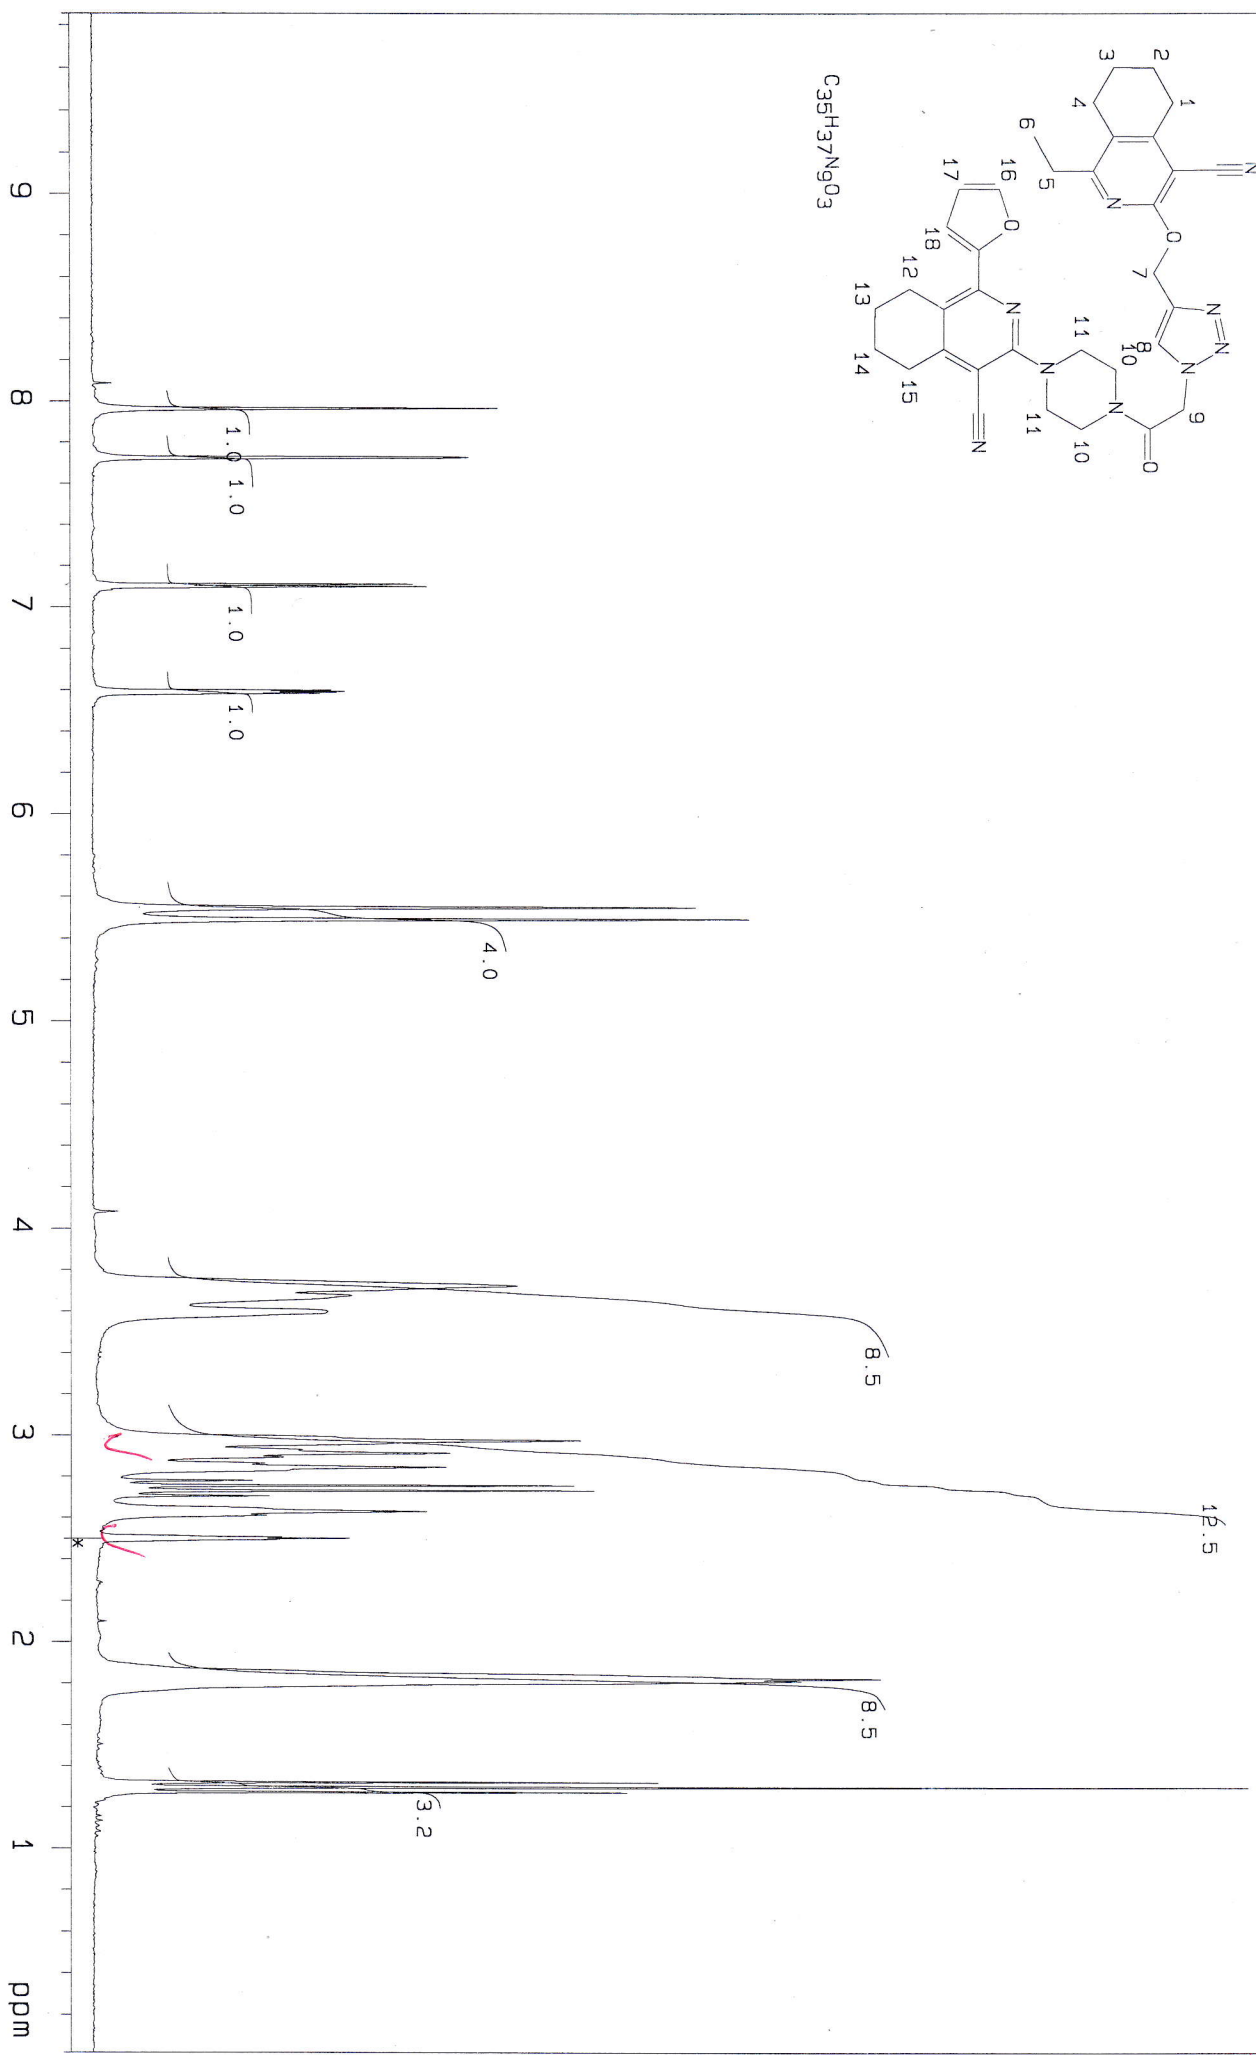

Handwritten signature

HA-1050  
Molecular Structure Research Centre, Yerevan, Armenia, Varian Mercury-300VX

C13 75.465 MHz, nt = 2512, np = 19998, temp = 30.0 C, lb = 1.0, solvent = DMSO/CDCl4 1/3

SAMV 19 ha-1050

Sep 30 2019

+ [Signature]

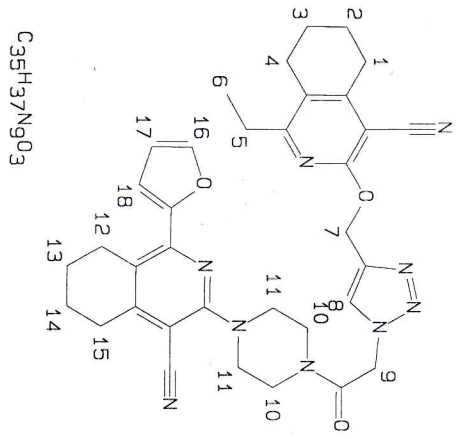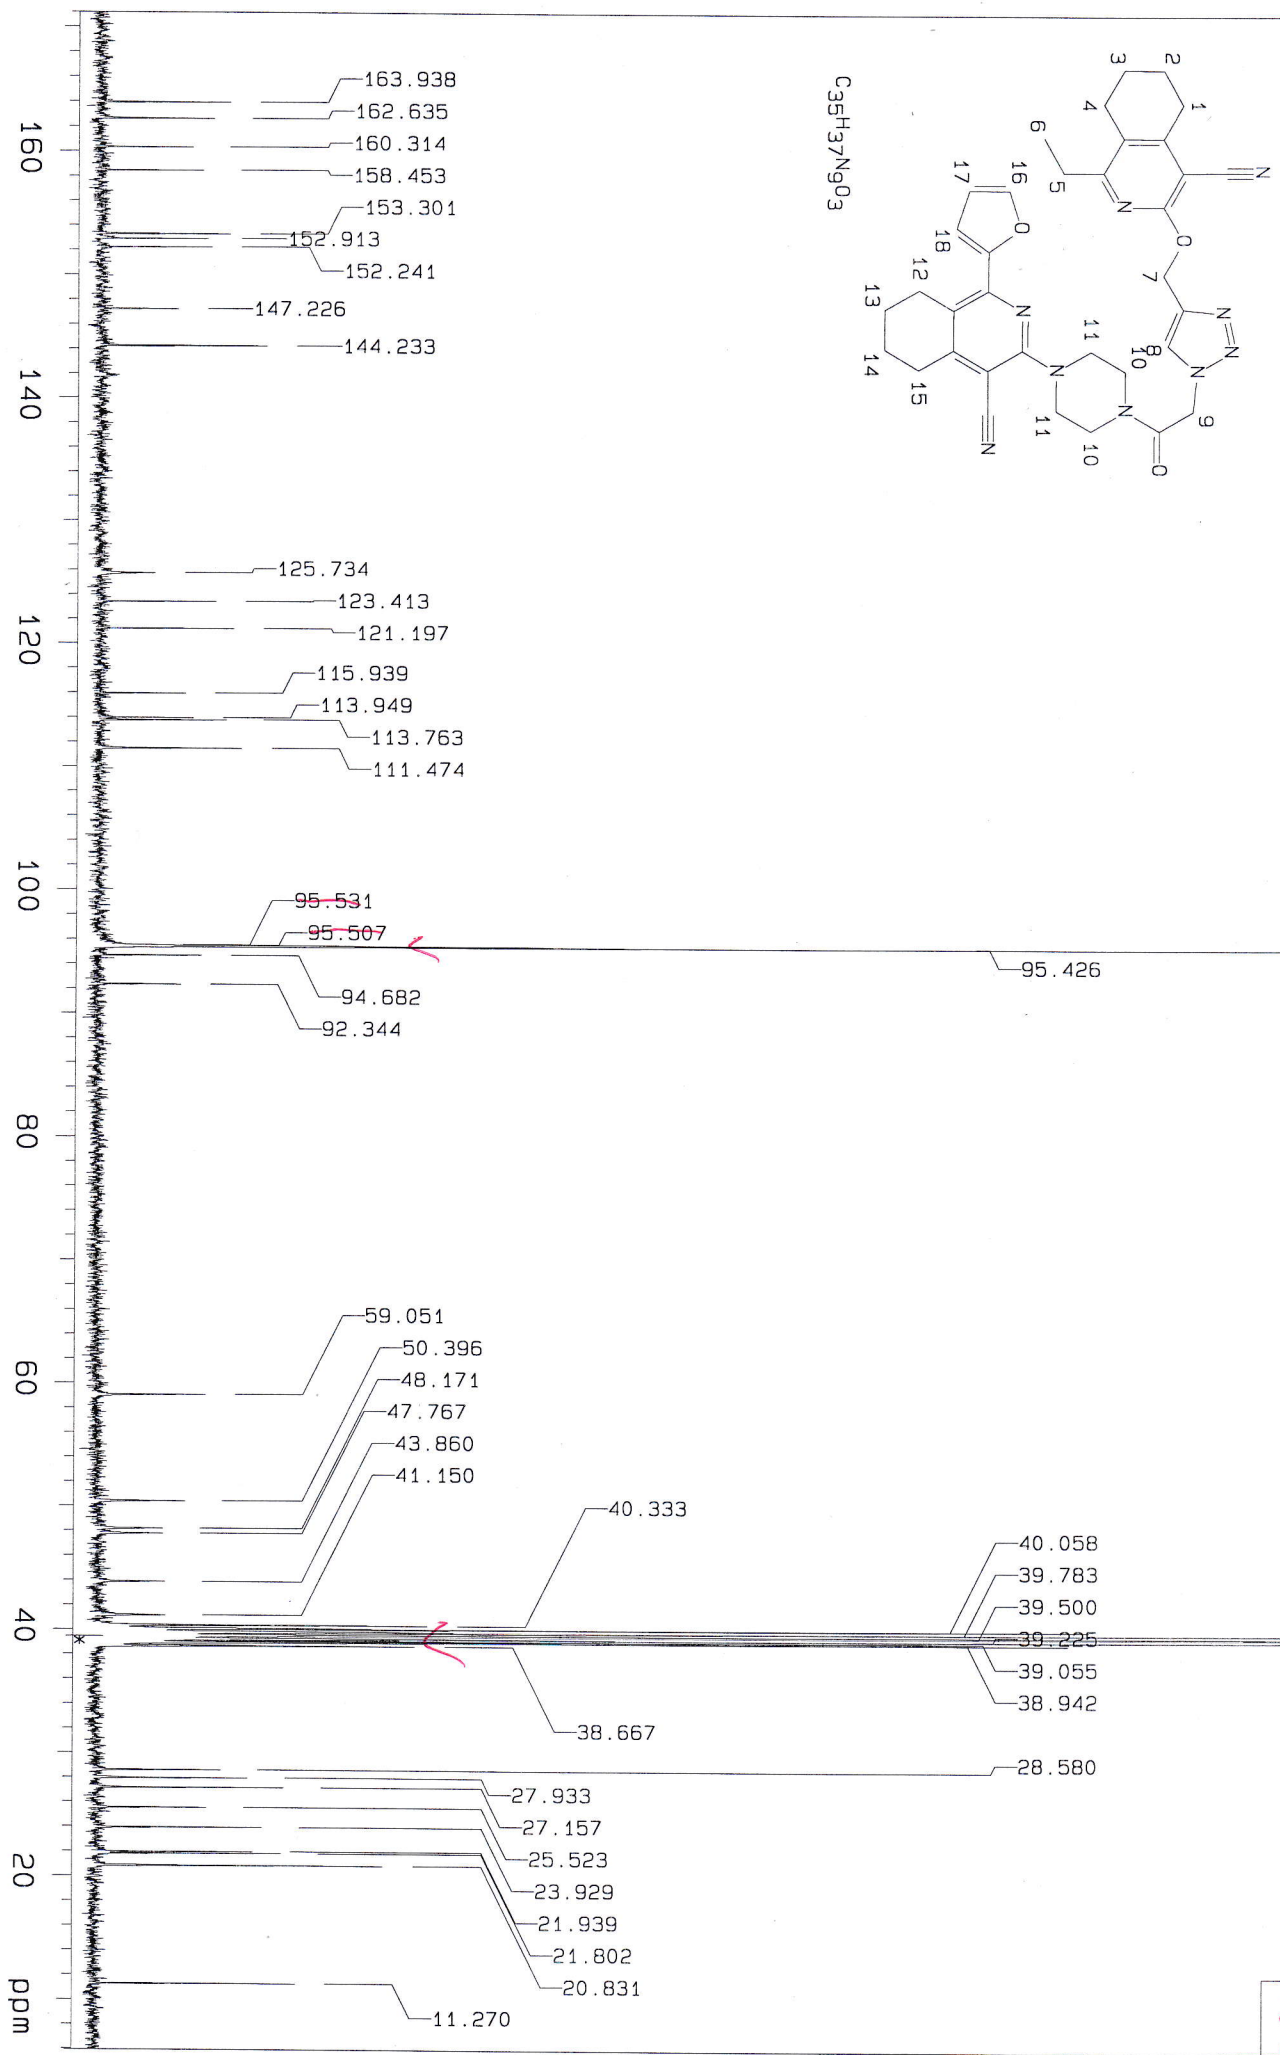

Hybrid 004  
SPIN25 4 (0.407)

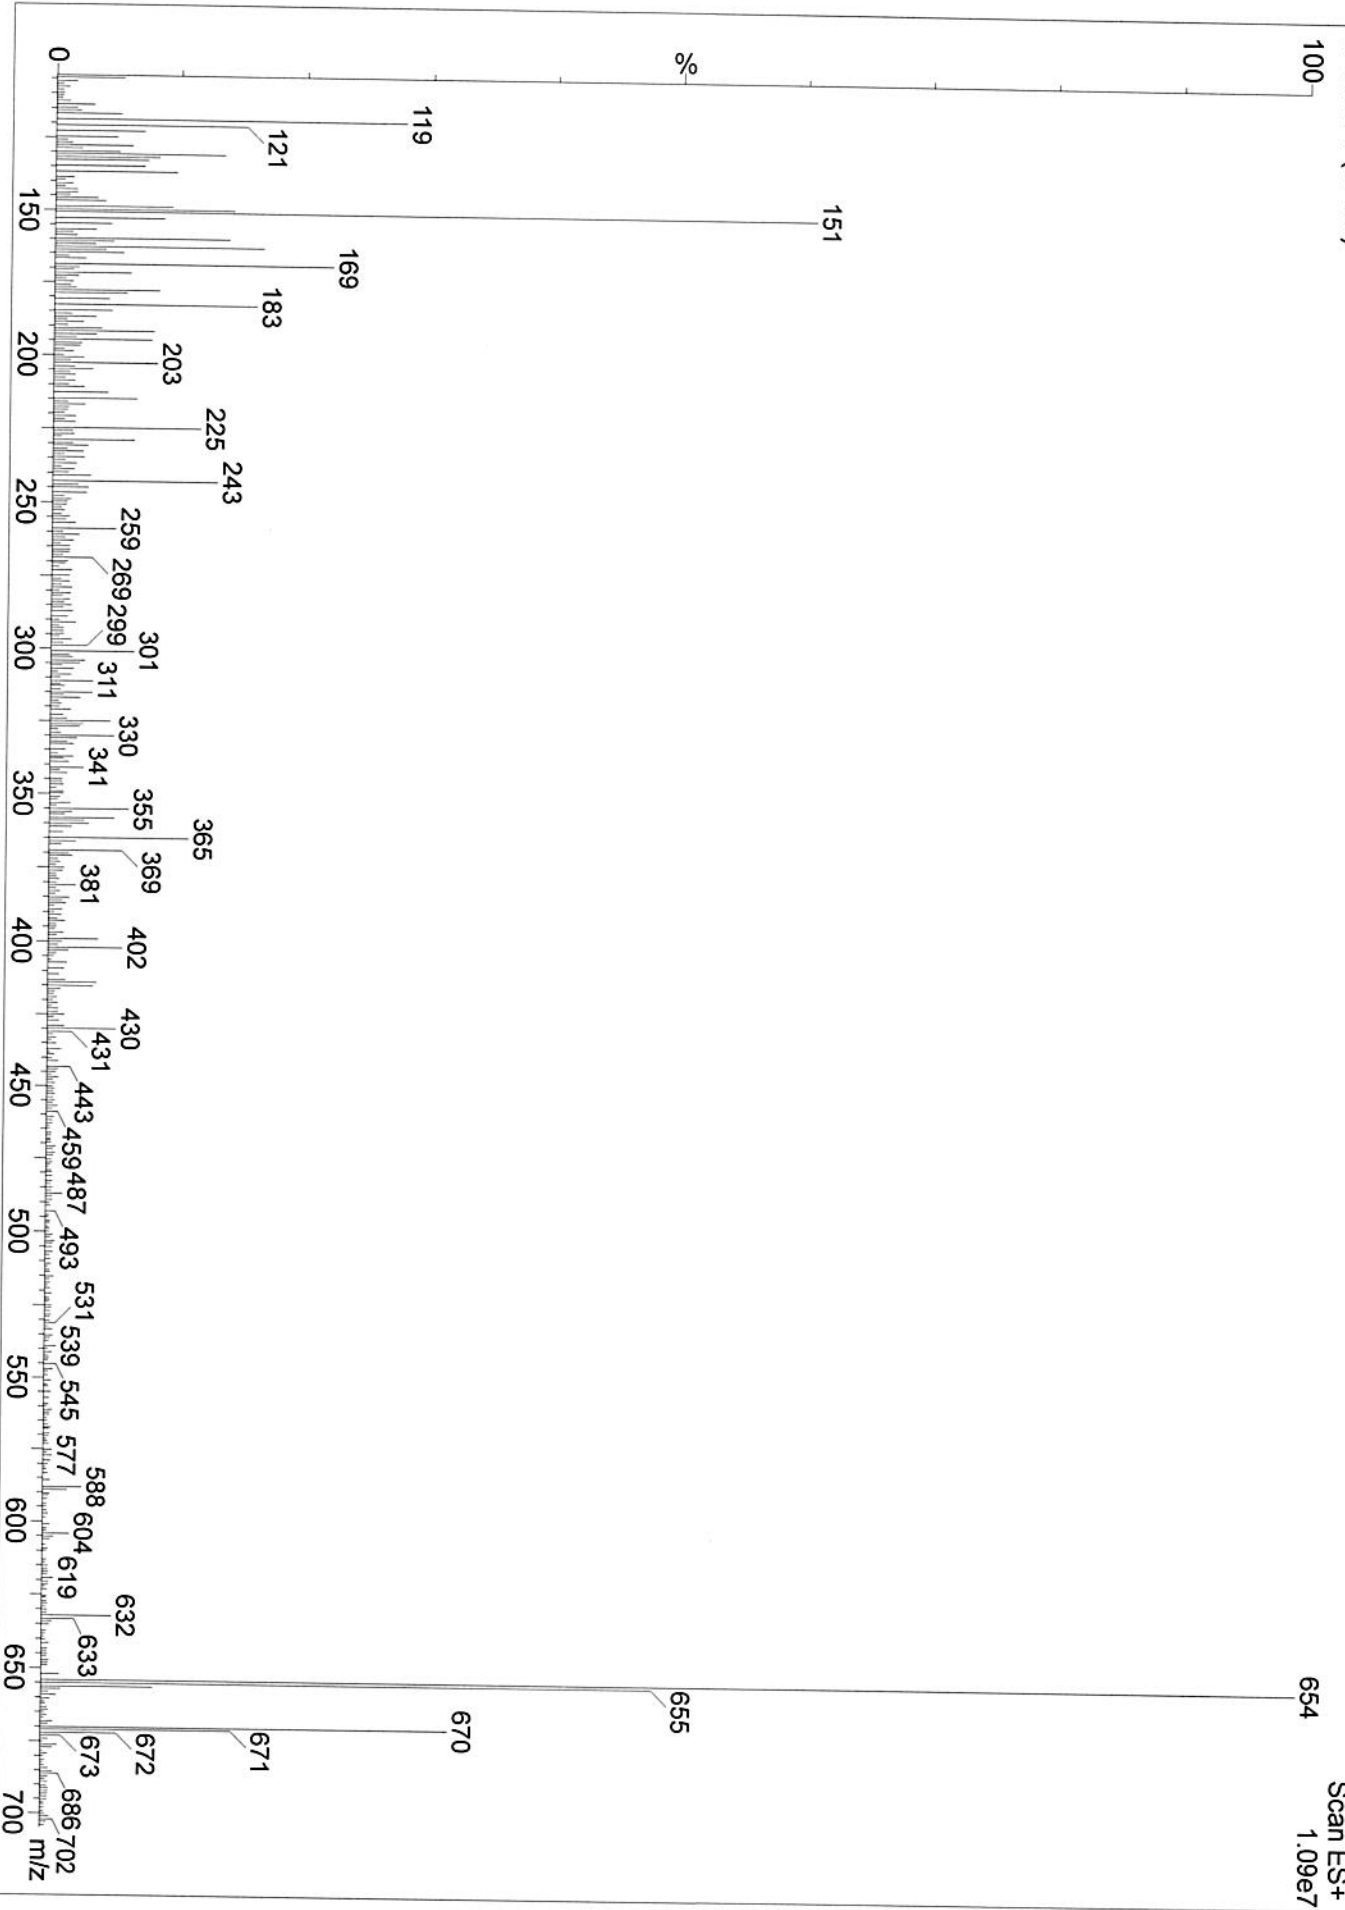

Scan ES+  
1.09e7

Hybrid 004

SPIN25 (0.102) Cu (0.20); Is (1.00, 1.00) C35H37N9O3Na1

Scan ES+  
6.56e12

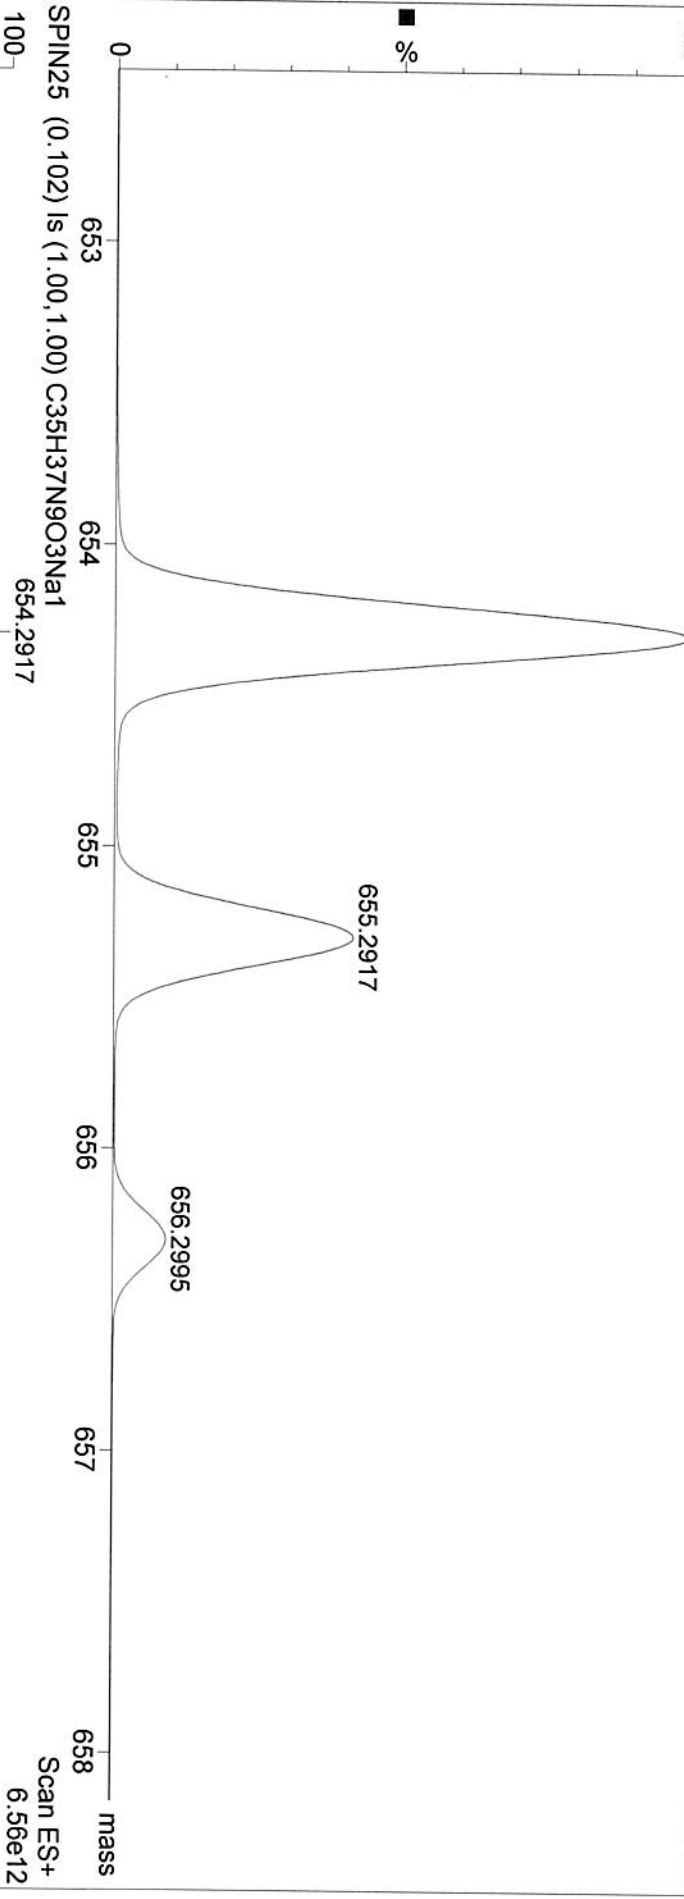

SPIN25 (0.102) Is (1.00, 1.00) C35H37N9O3Na1

Scan ES+  
6.56e12

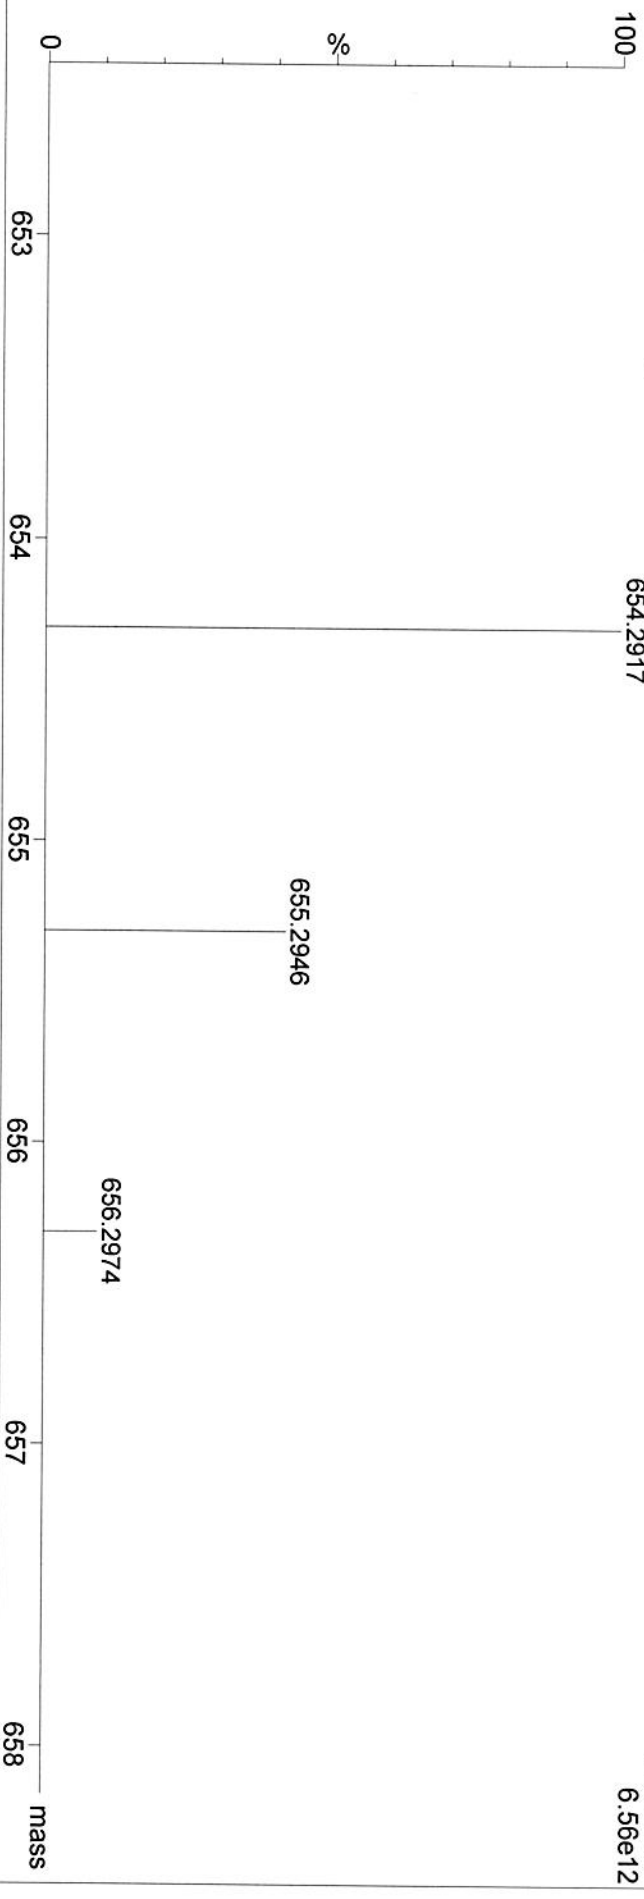



HA-1120

H1 300.088 MHz, nt = 16, np = 32000, temp = 30.0 C, lb = -0.2, solvent = DMSO-CD3 1/3

ANUSH\_TEMA ha-1120

Apr 28 2021

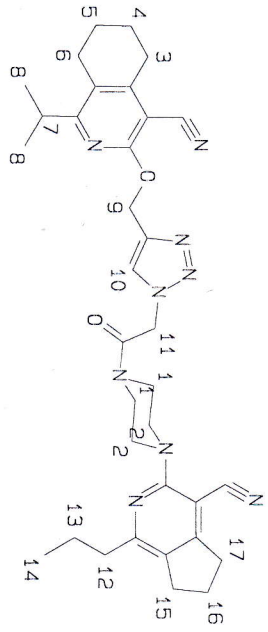

C<sub>32</sub>H<sub>41</sub>N<sub>9</sub>O<sub>2</sub>

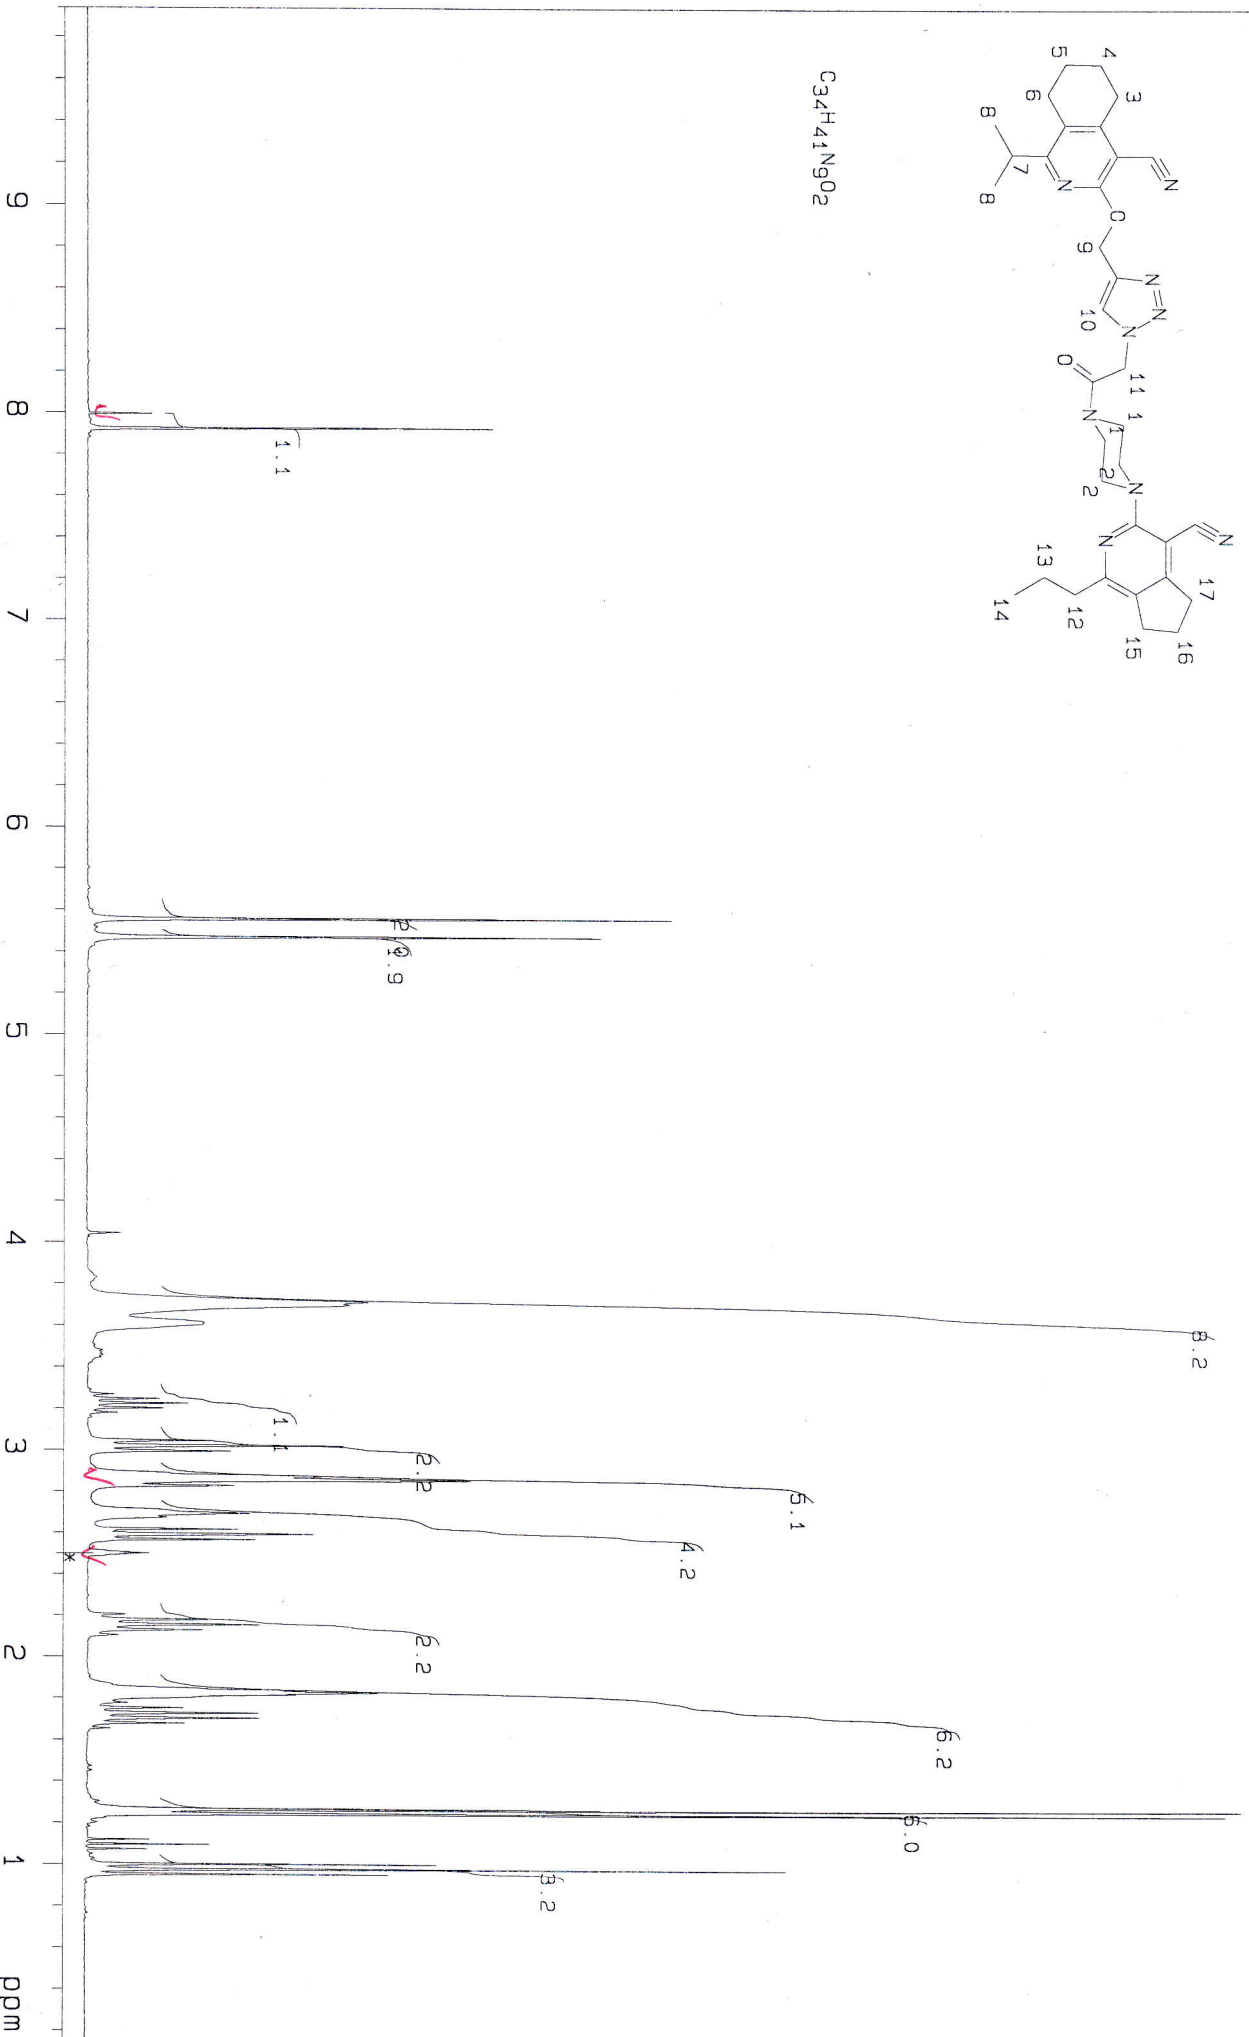

+ [Signature]

Bi Hybrid 005

Molecular Structure Research Centre, Yerevan, Armenia, Varian Mercury-300VX  
HA-1120

C13 75.465 MHz,  $\eta = 784$ ,  $\mu = 19998$ , temp = 30.0 C,  $\rho = 1.0$ , solvent = DMSO- $d_6$  1/3  
ANUSH\_TEMA na-1120

Apr 28 2021

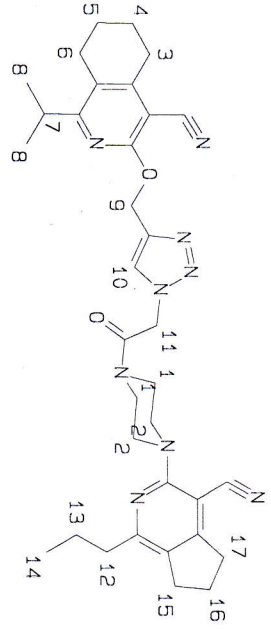

$C_{34}H_{41}N_9O_2$

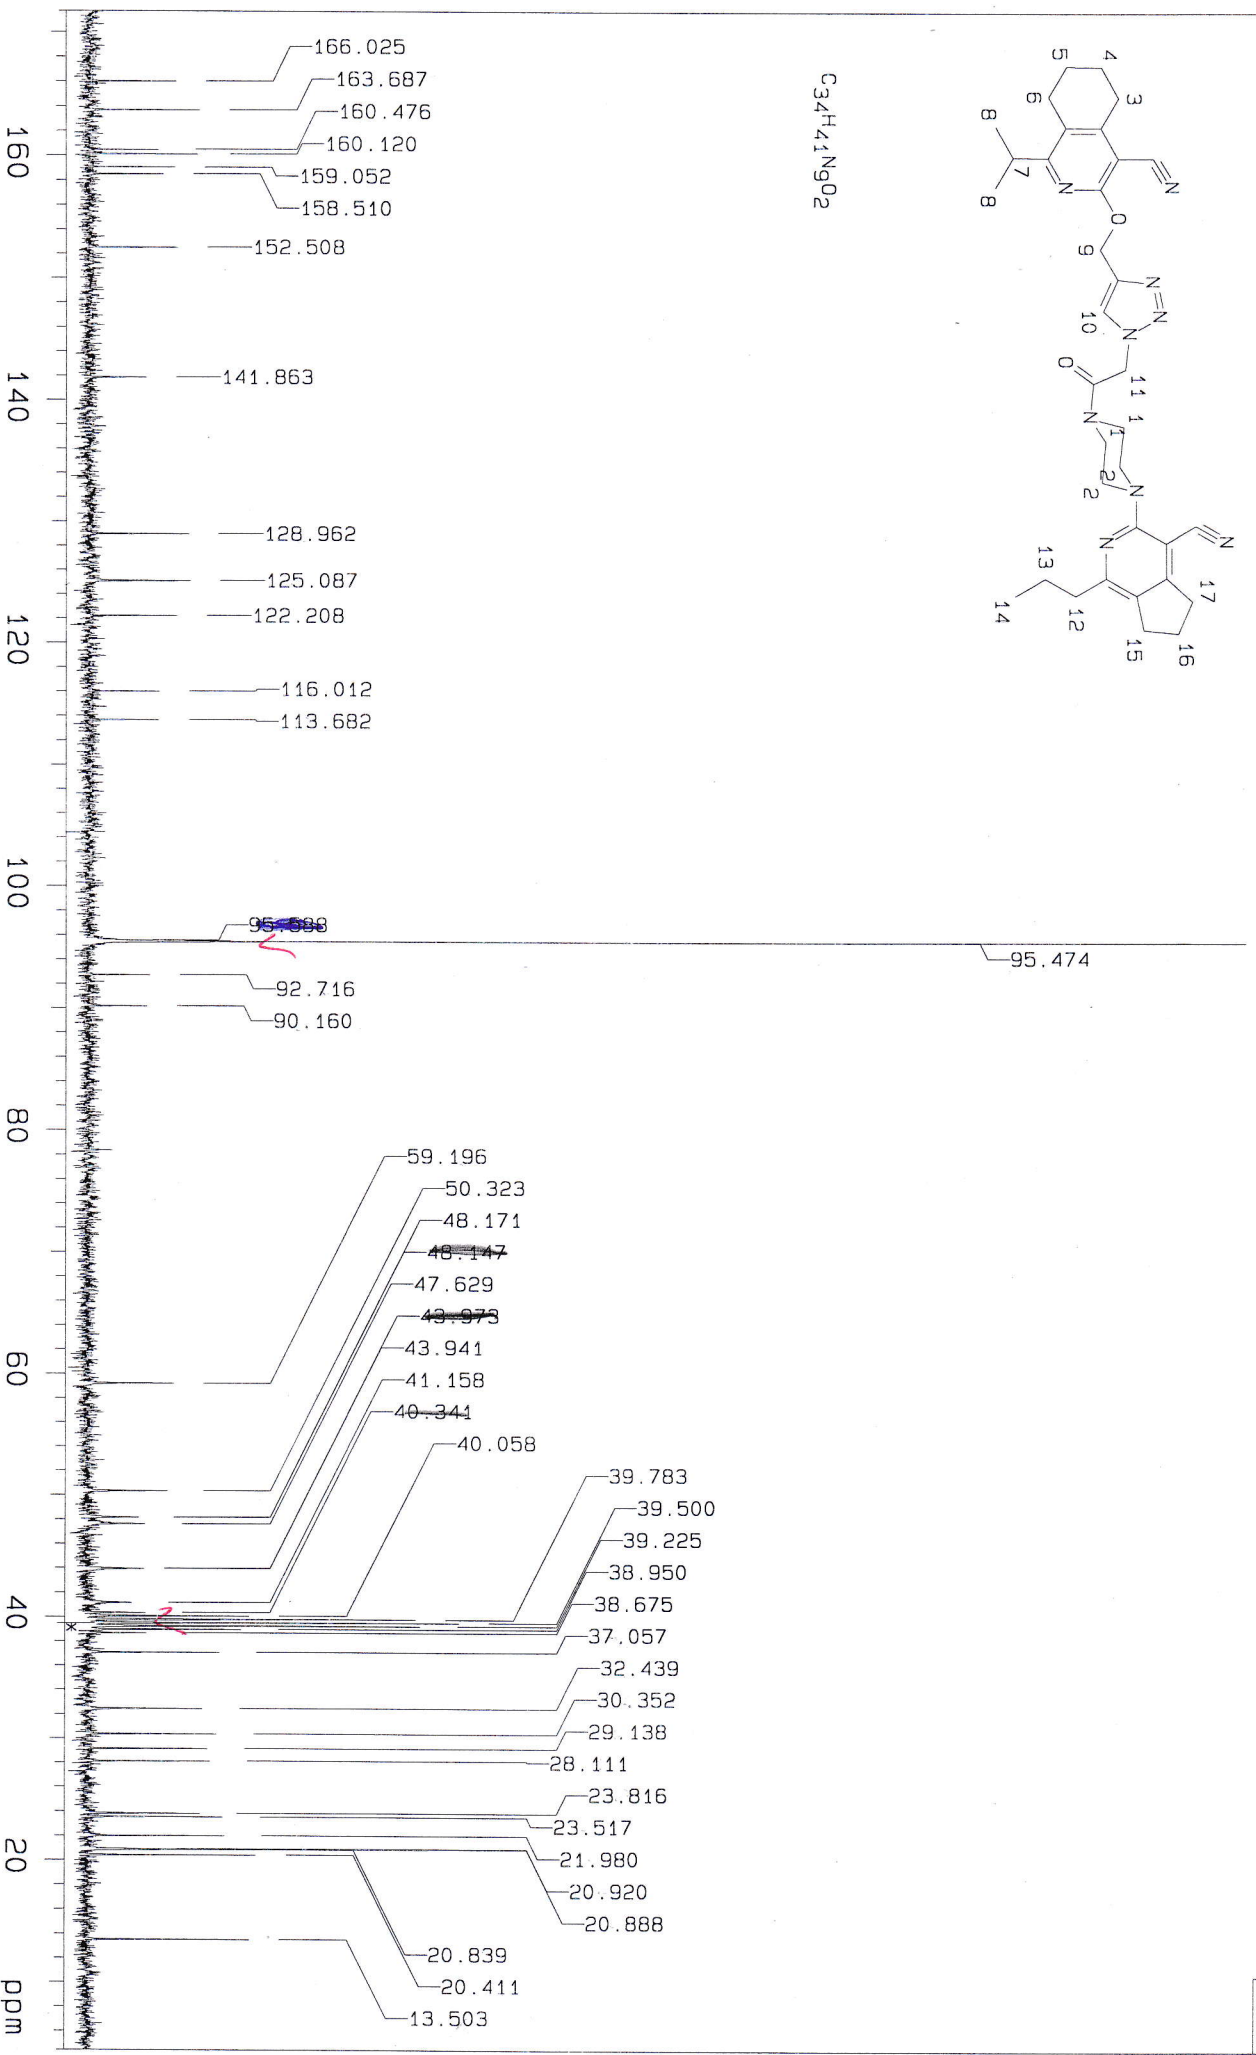

+ [Signature]

Hybrid 005

SPIN26 5 (0.509)

100

Scan ES+  
2.75e7

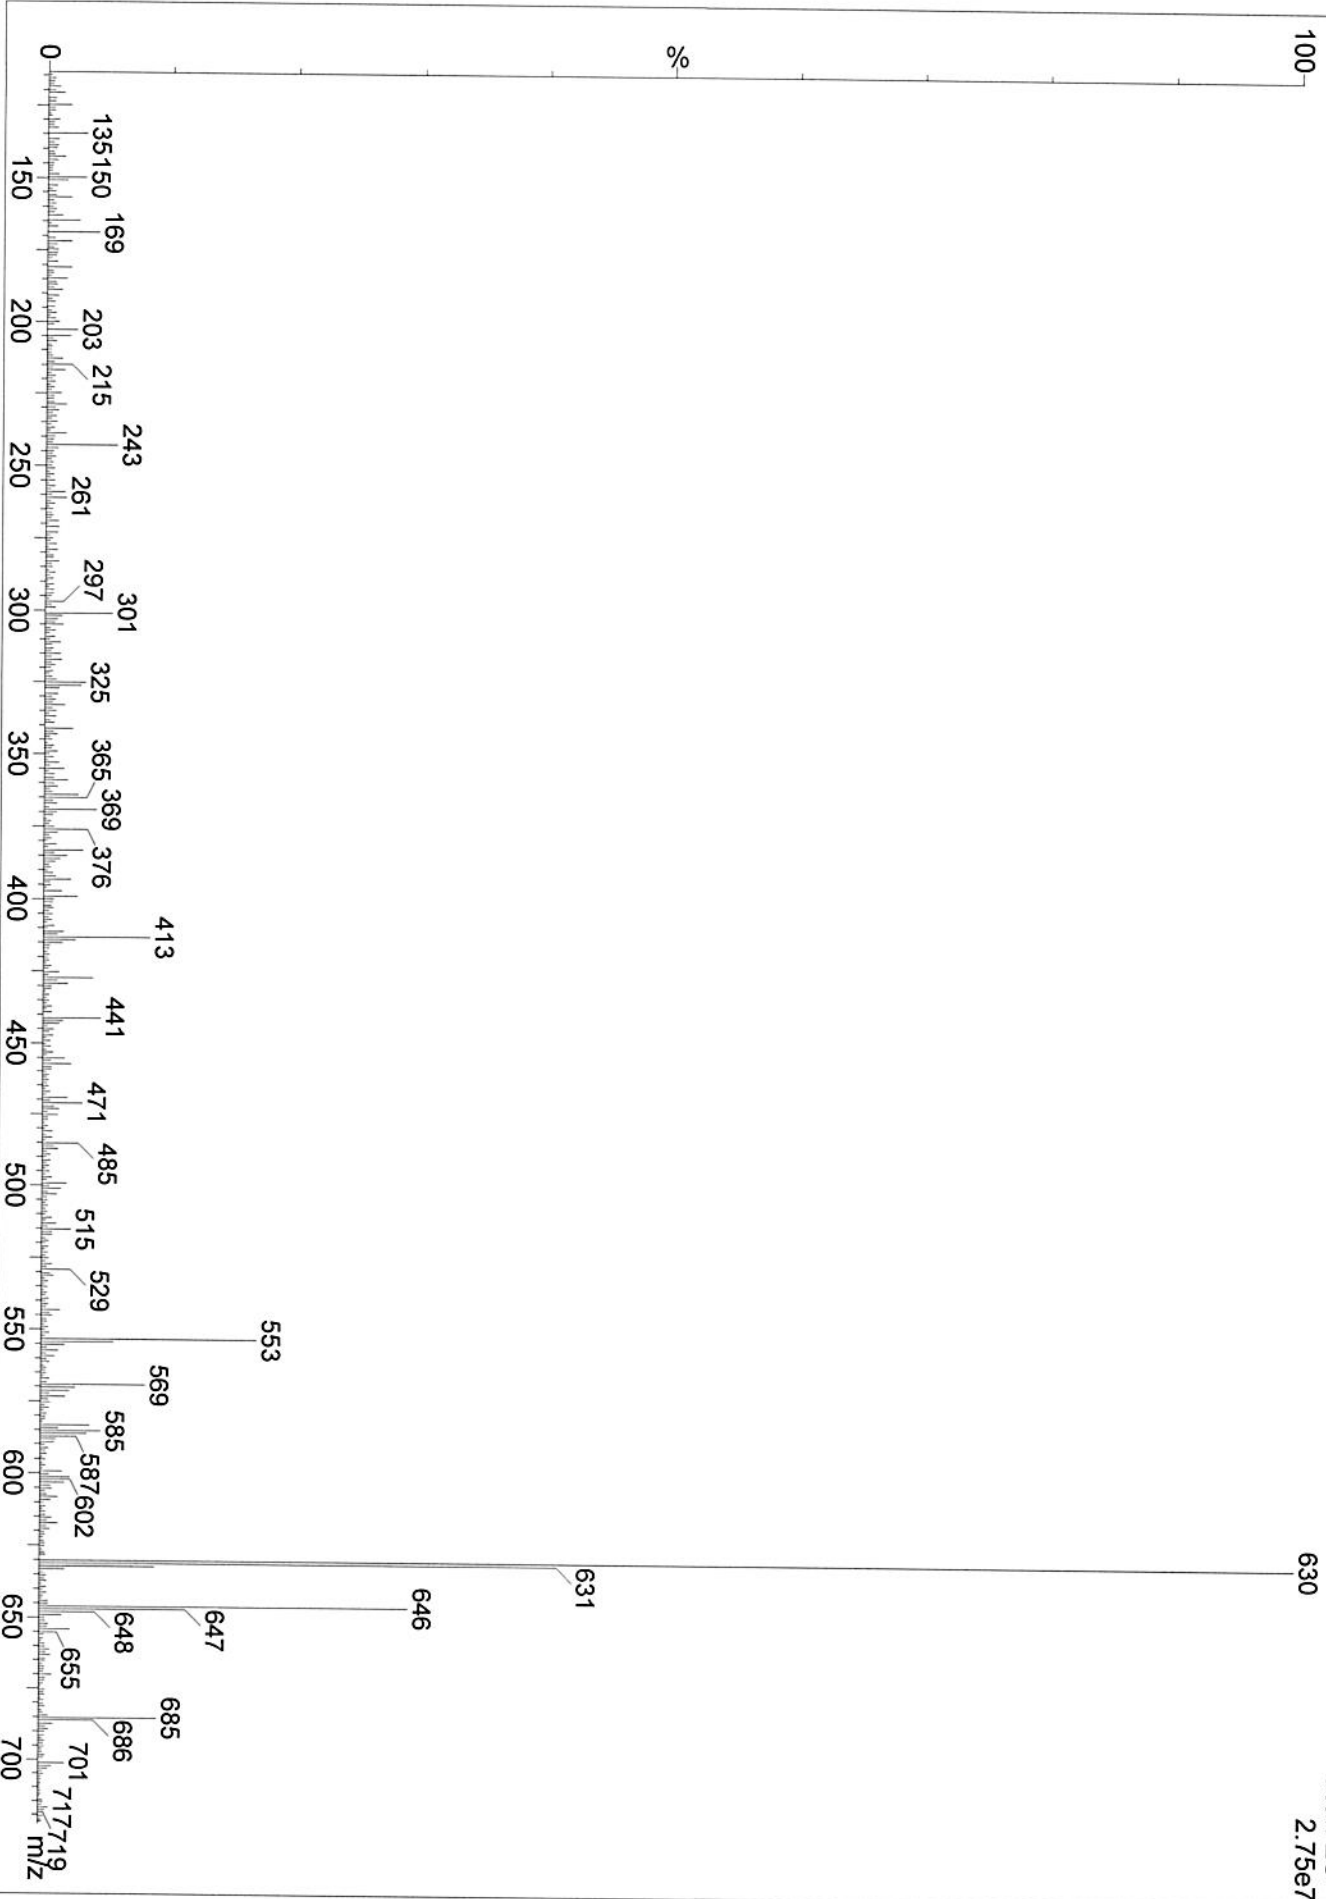

Hybrid 005

SPIN26 (0.102) Cu (0.20); Is (1.00,1.00) C<sub>34</sub>H<sub>41</sub>N<sub>9</sub>O<sub>2</sub>Na<sub>1</sub>

Scan ES+  
6.65e12

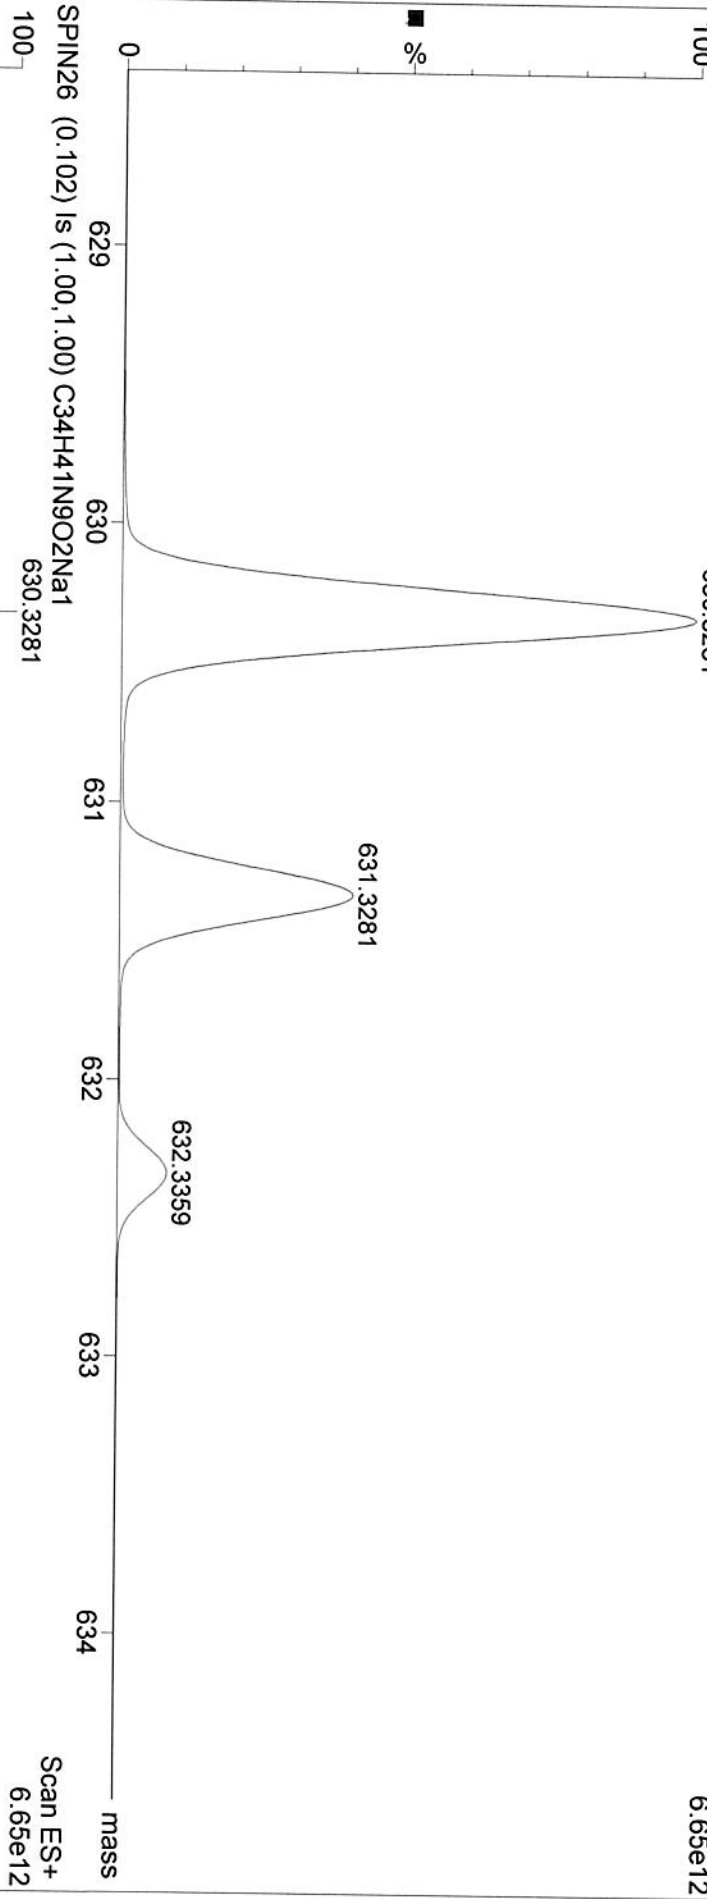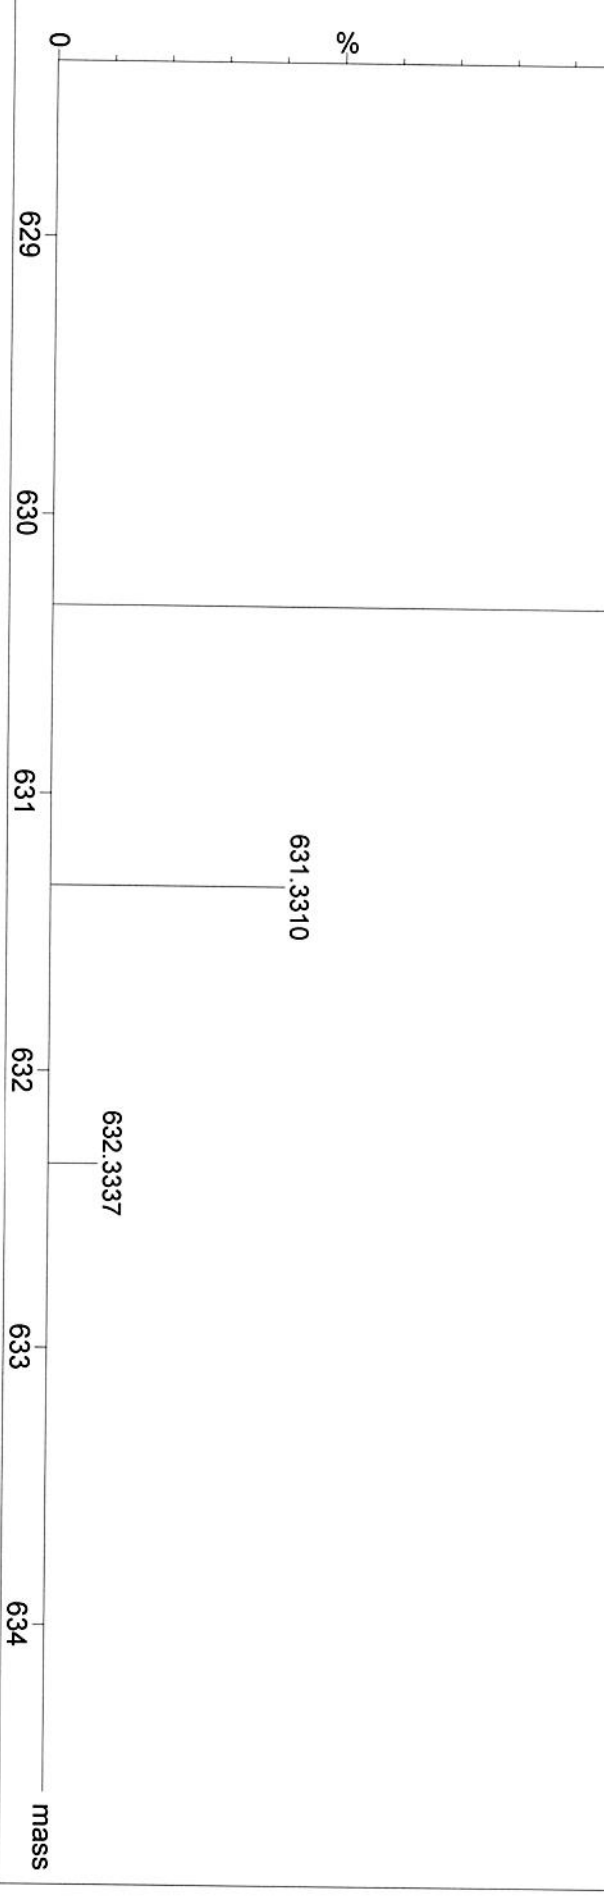



April 5, 2021 6:30:4

BRUKER  
Avance 400 Neo  
TopSpin 4.0.6

ha-1118 in DMSO/CCl4, 13C, 05/04,

Hybrid 007  
GR

- 165.855
- 163.539
- 159.585
- 158.734
- 154.010
- 152.488
- 151.297
- 146.386
- 144.024
- 125.739
- 121.958
- 120.910
- 114.254
- 113.489
- 111.466
- 93.578
- 93.483
- 59.354
- 50.280
- 48.072
- 47.481
- 43.861
- 41.053
- 30.185
- 28.334
- 28.113
- 25.362
- 23.694
- 21.900
- 21.807
- 20.950

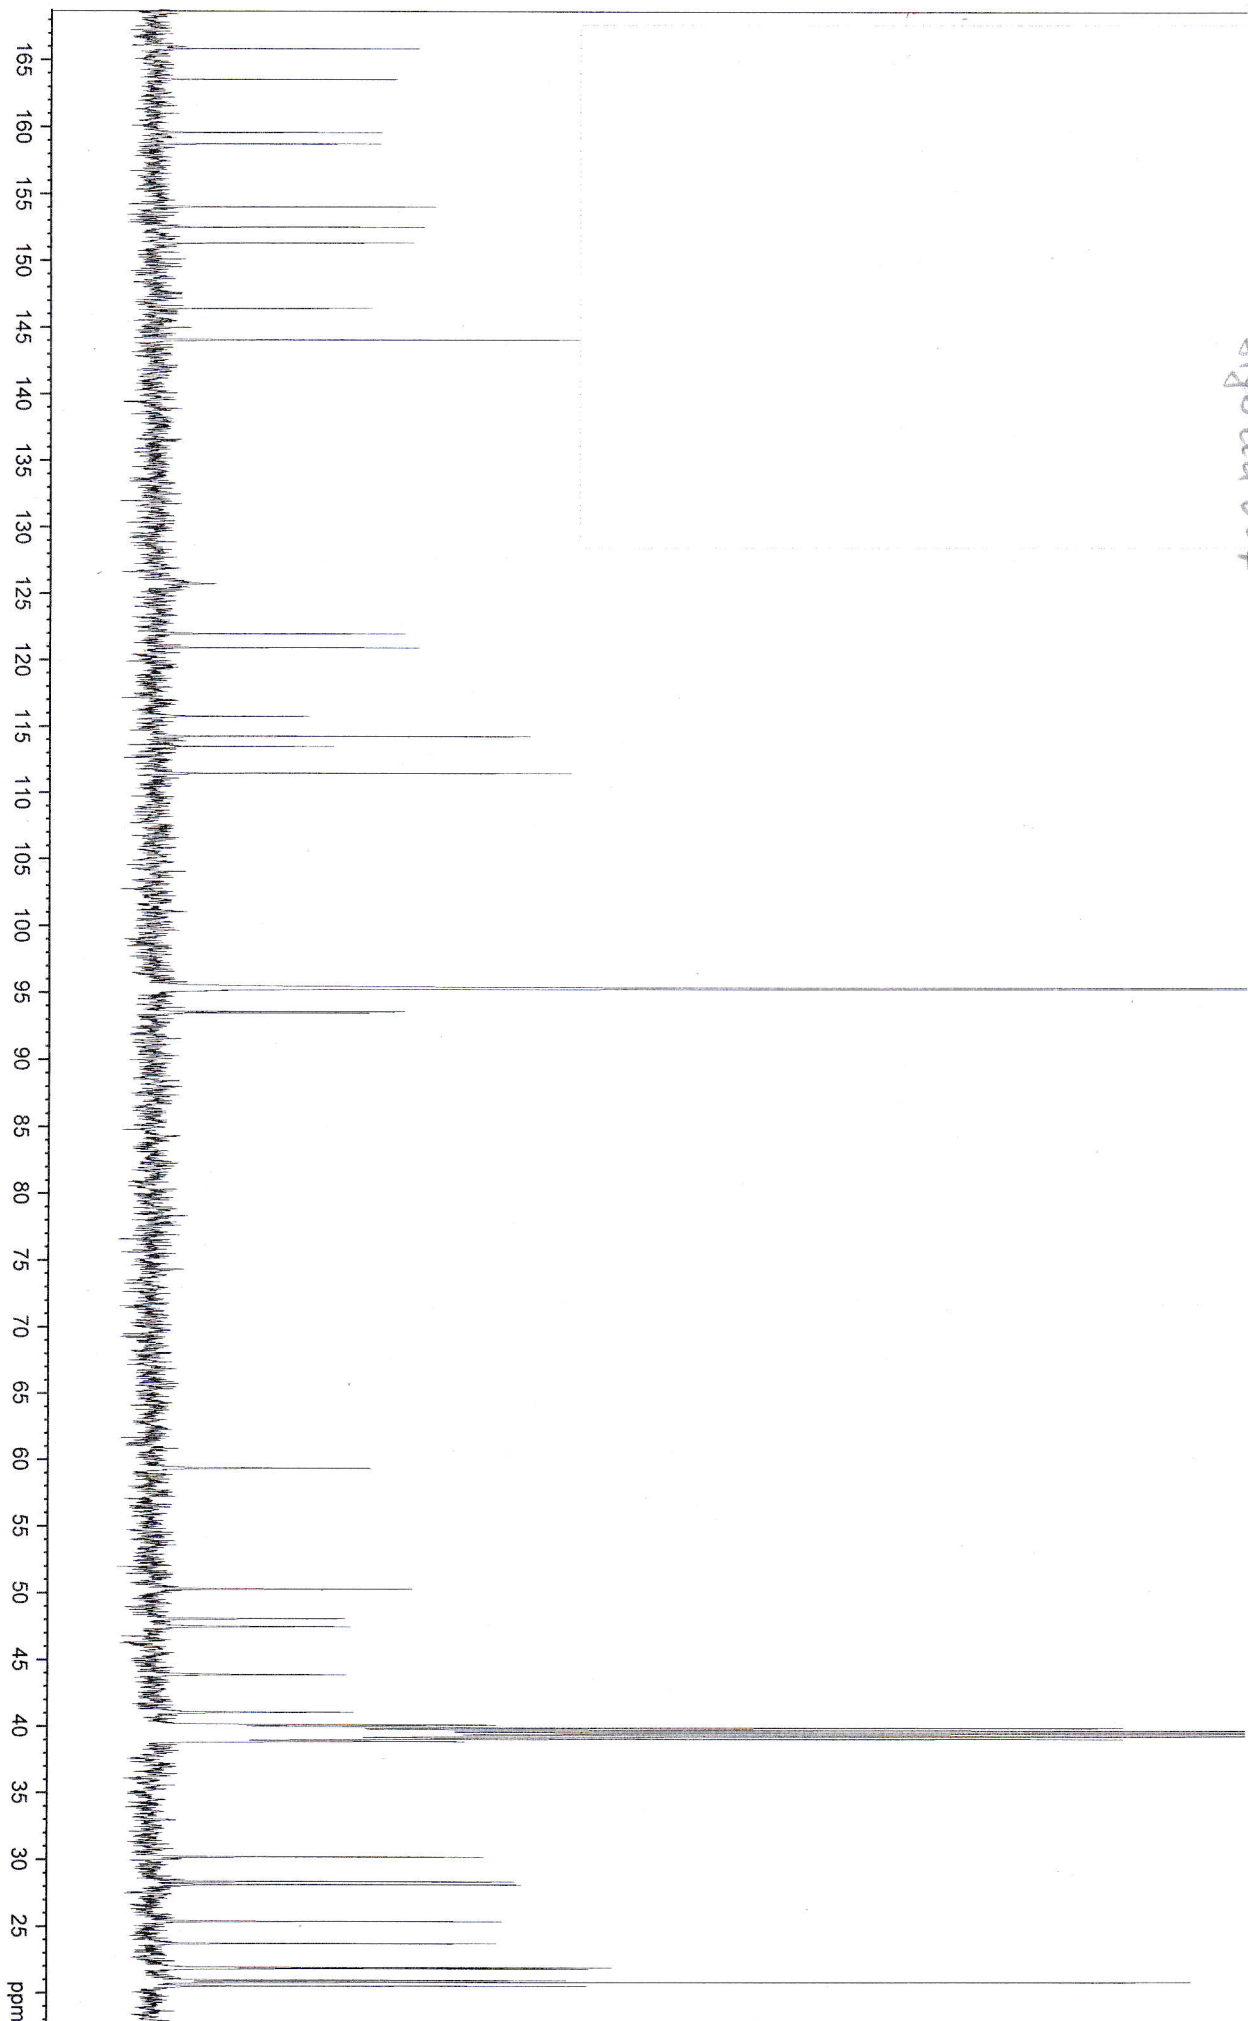



Hybrid 007

SPIN28 13 (1.324)

100

Scan ES+  
6.20e6

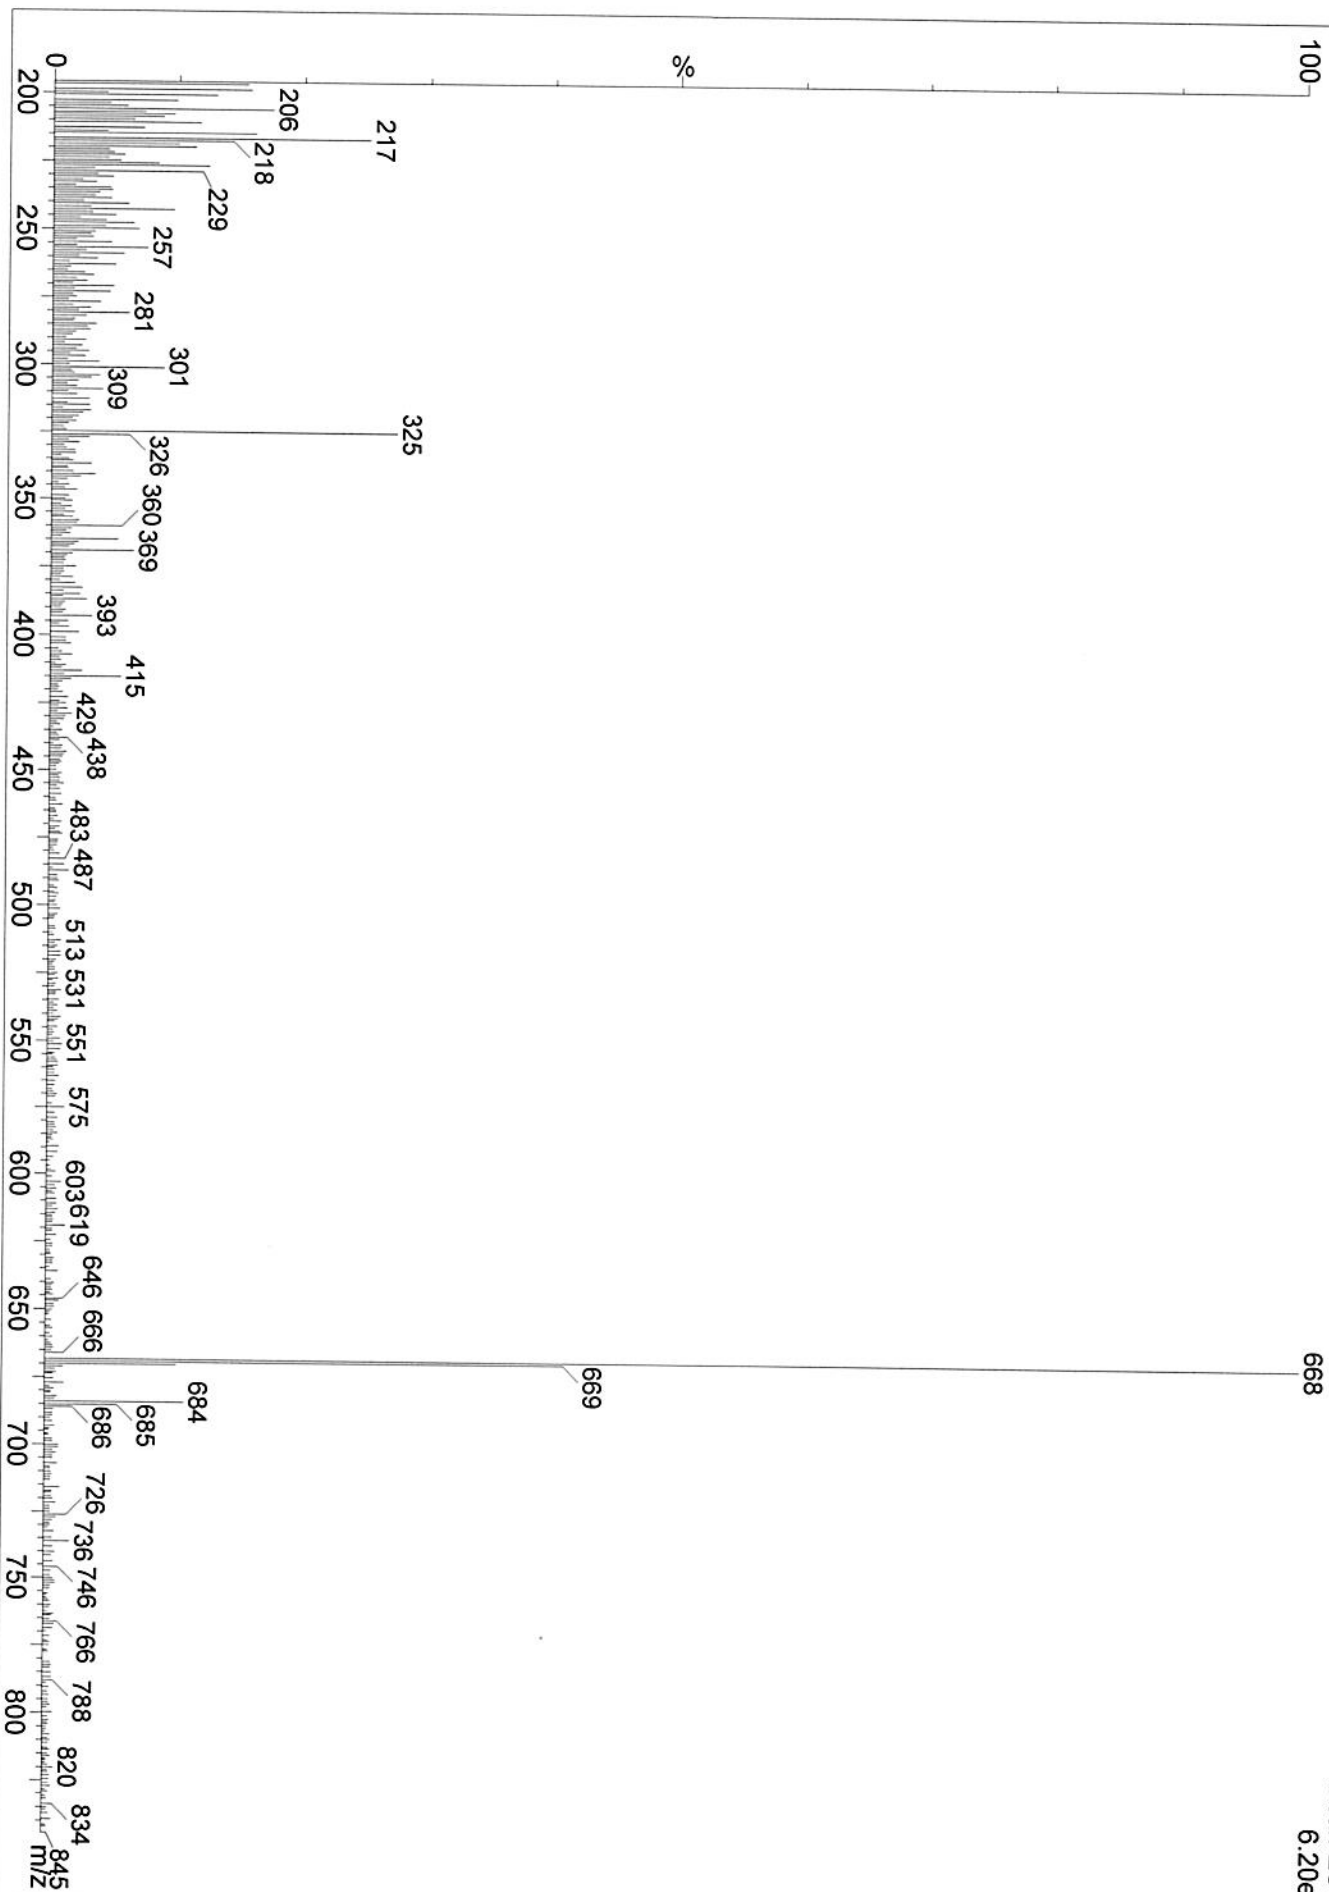

Hybrid 007

SPIN28 (0.102) Cu (0.20); Is (1.00,1.00) C36H39N9O3Na1

Scan ES+  
6.49e12

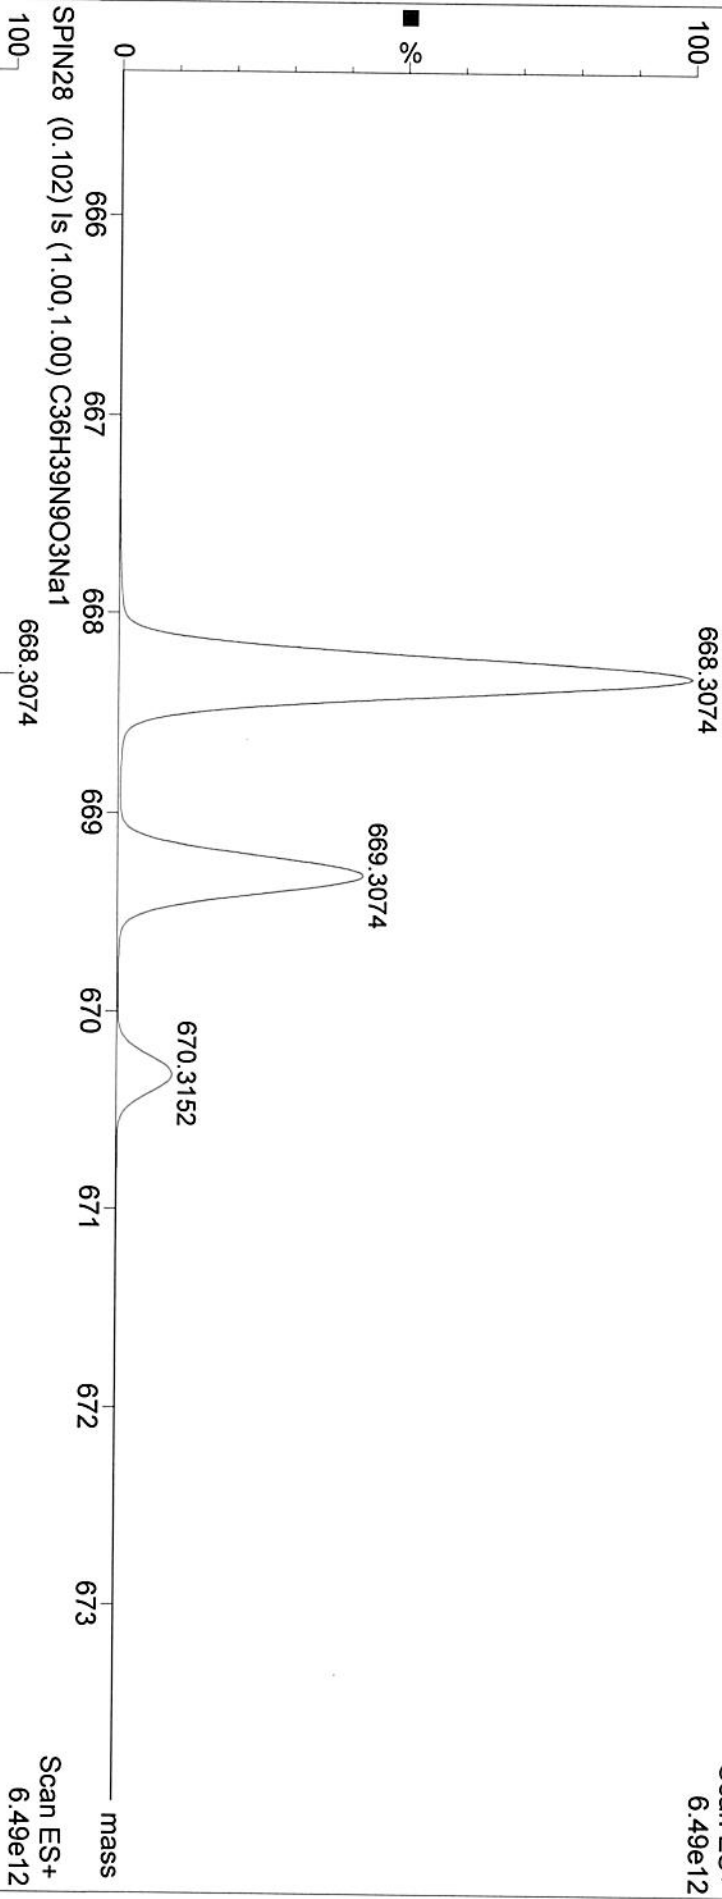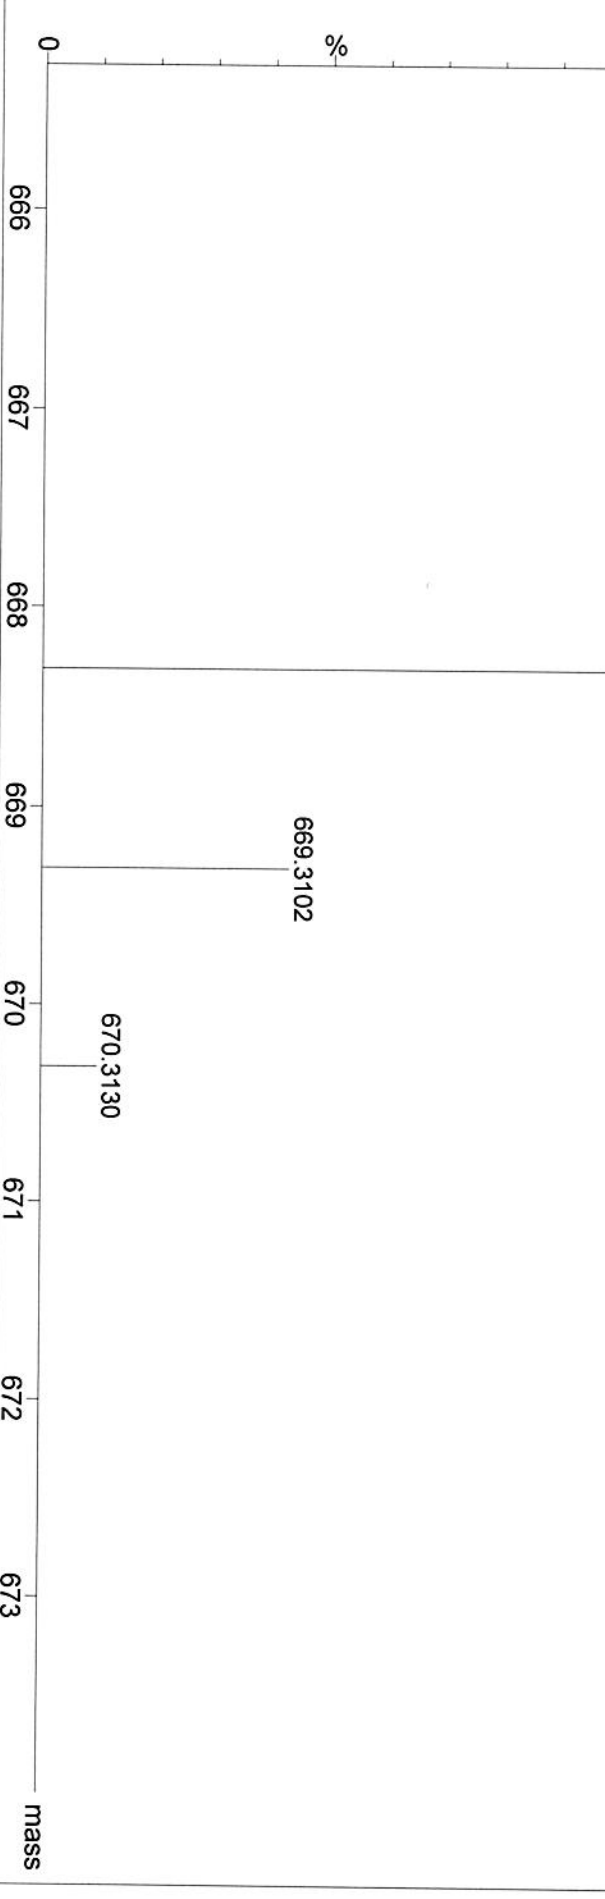

Hybrid 008 6e

Molecular Structure Research Centre, Yerevan, Armenia, Varian Mercury-300VX

H1 300.088 MHz,  $n^2 = 16$ ,  $np = 32000$ ,  $temp = 30.0$  C,  $lp = -0.2$ , solvent = DMSO- $d_6$ /C14 1/3

NOCI\_20 ha-1108

Sep 28 2020

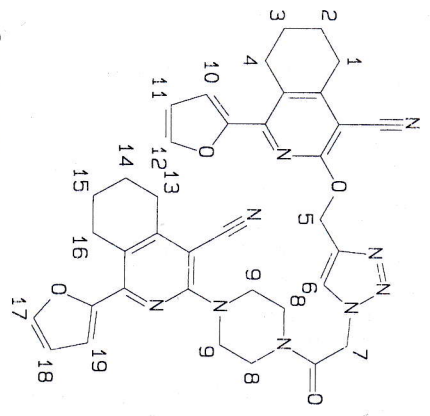

C<sub>37</sub>H<sub>35</sub>N<sub>9</sub>O<sub>4</sub>

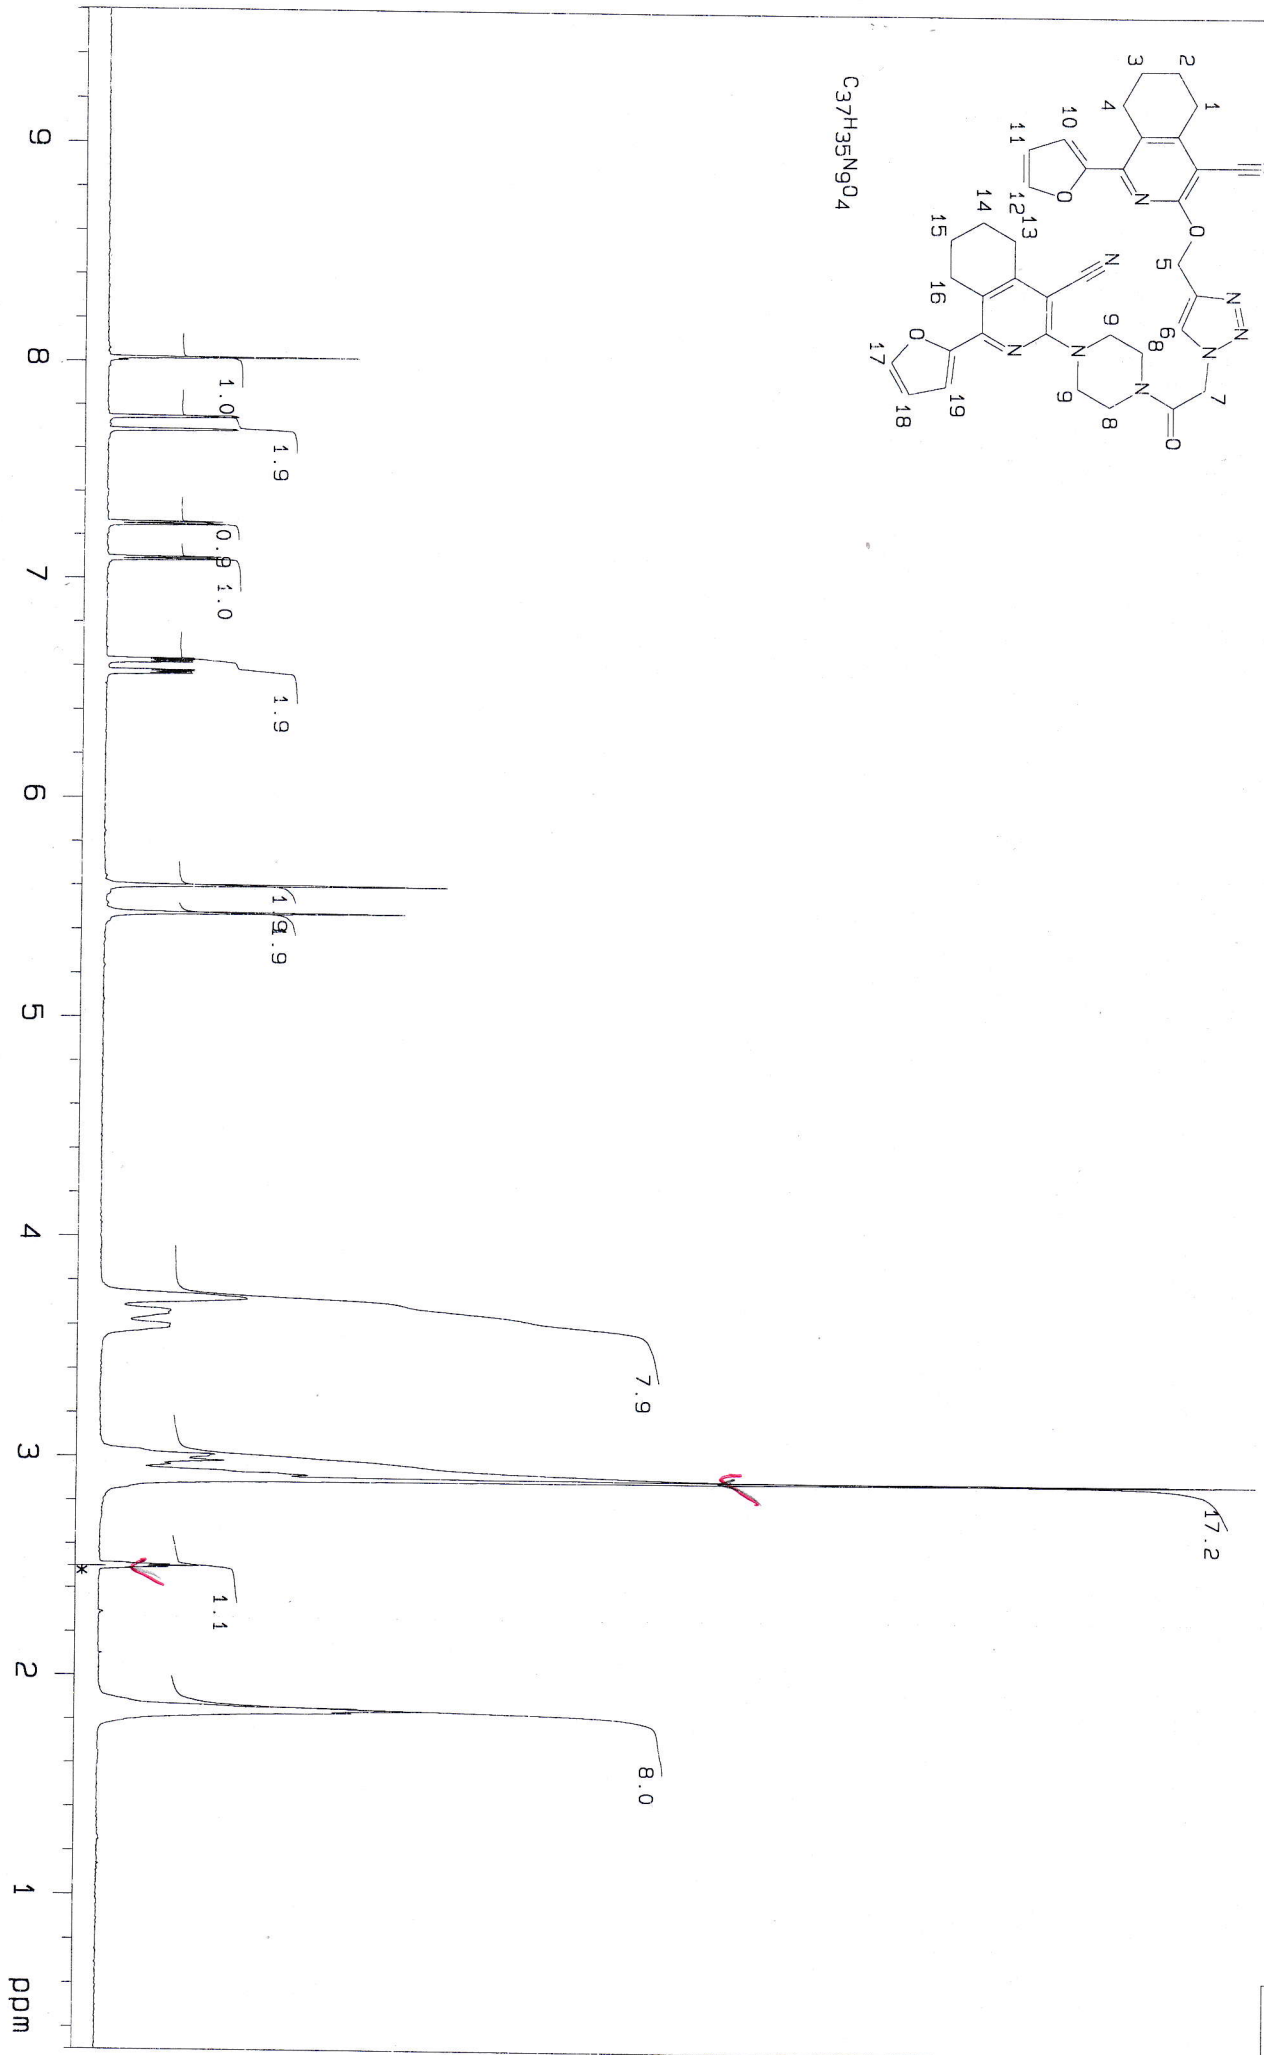

+ Conf

62 Hybrid 008

HA-1108

C13 75.465 MHz, nt=4128, np=19998, temp=30.0 C, lb=1.0, solvent=DMSO/CD14 1/3

NOCI\_20 HA-1108

Sep 28 2020

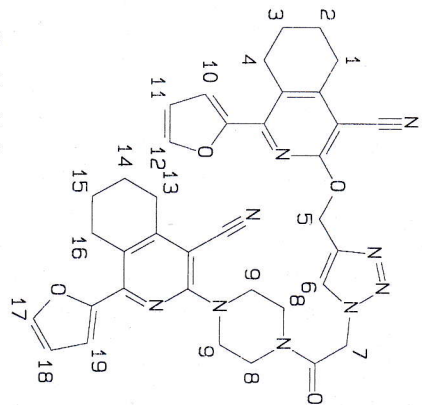

C<sub>37</sub>H<sub>35</sub>N<sub>9</sub>O<sub>4</sub>

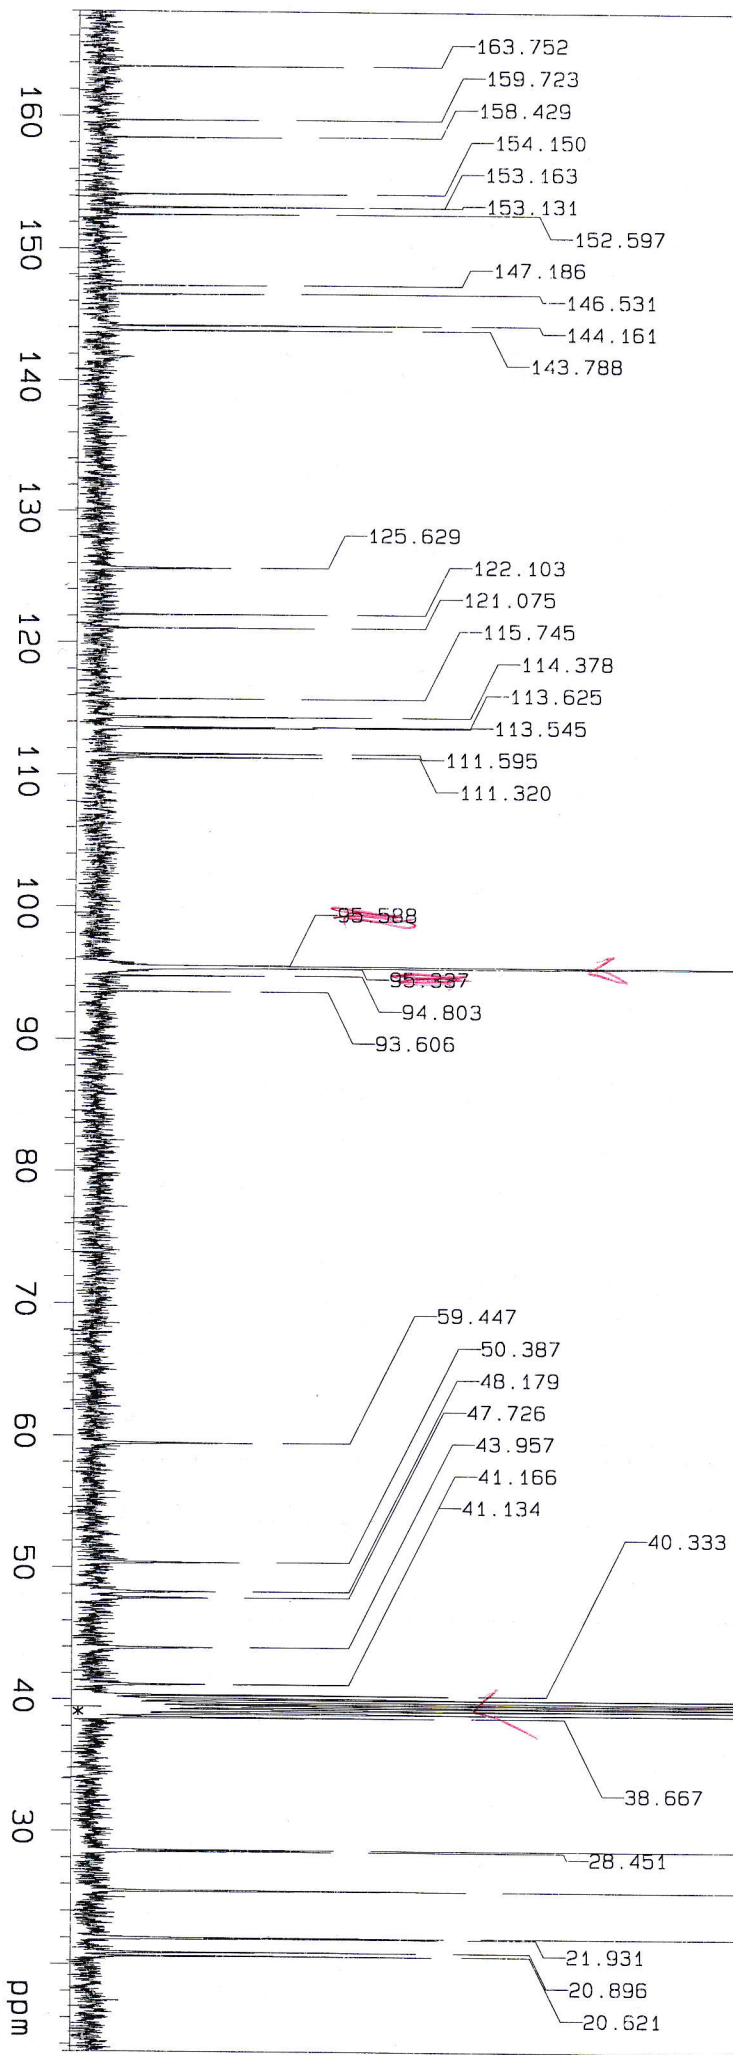

+  
*[Handwritten signature]*

Hybrid 008  
SPIN29 4 (0.407)

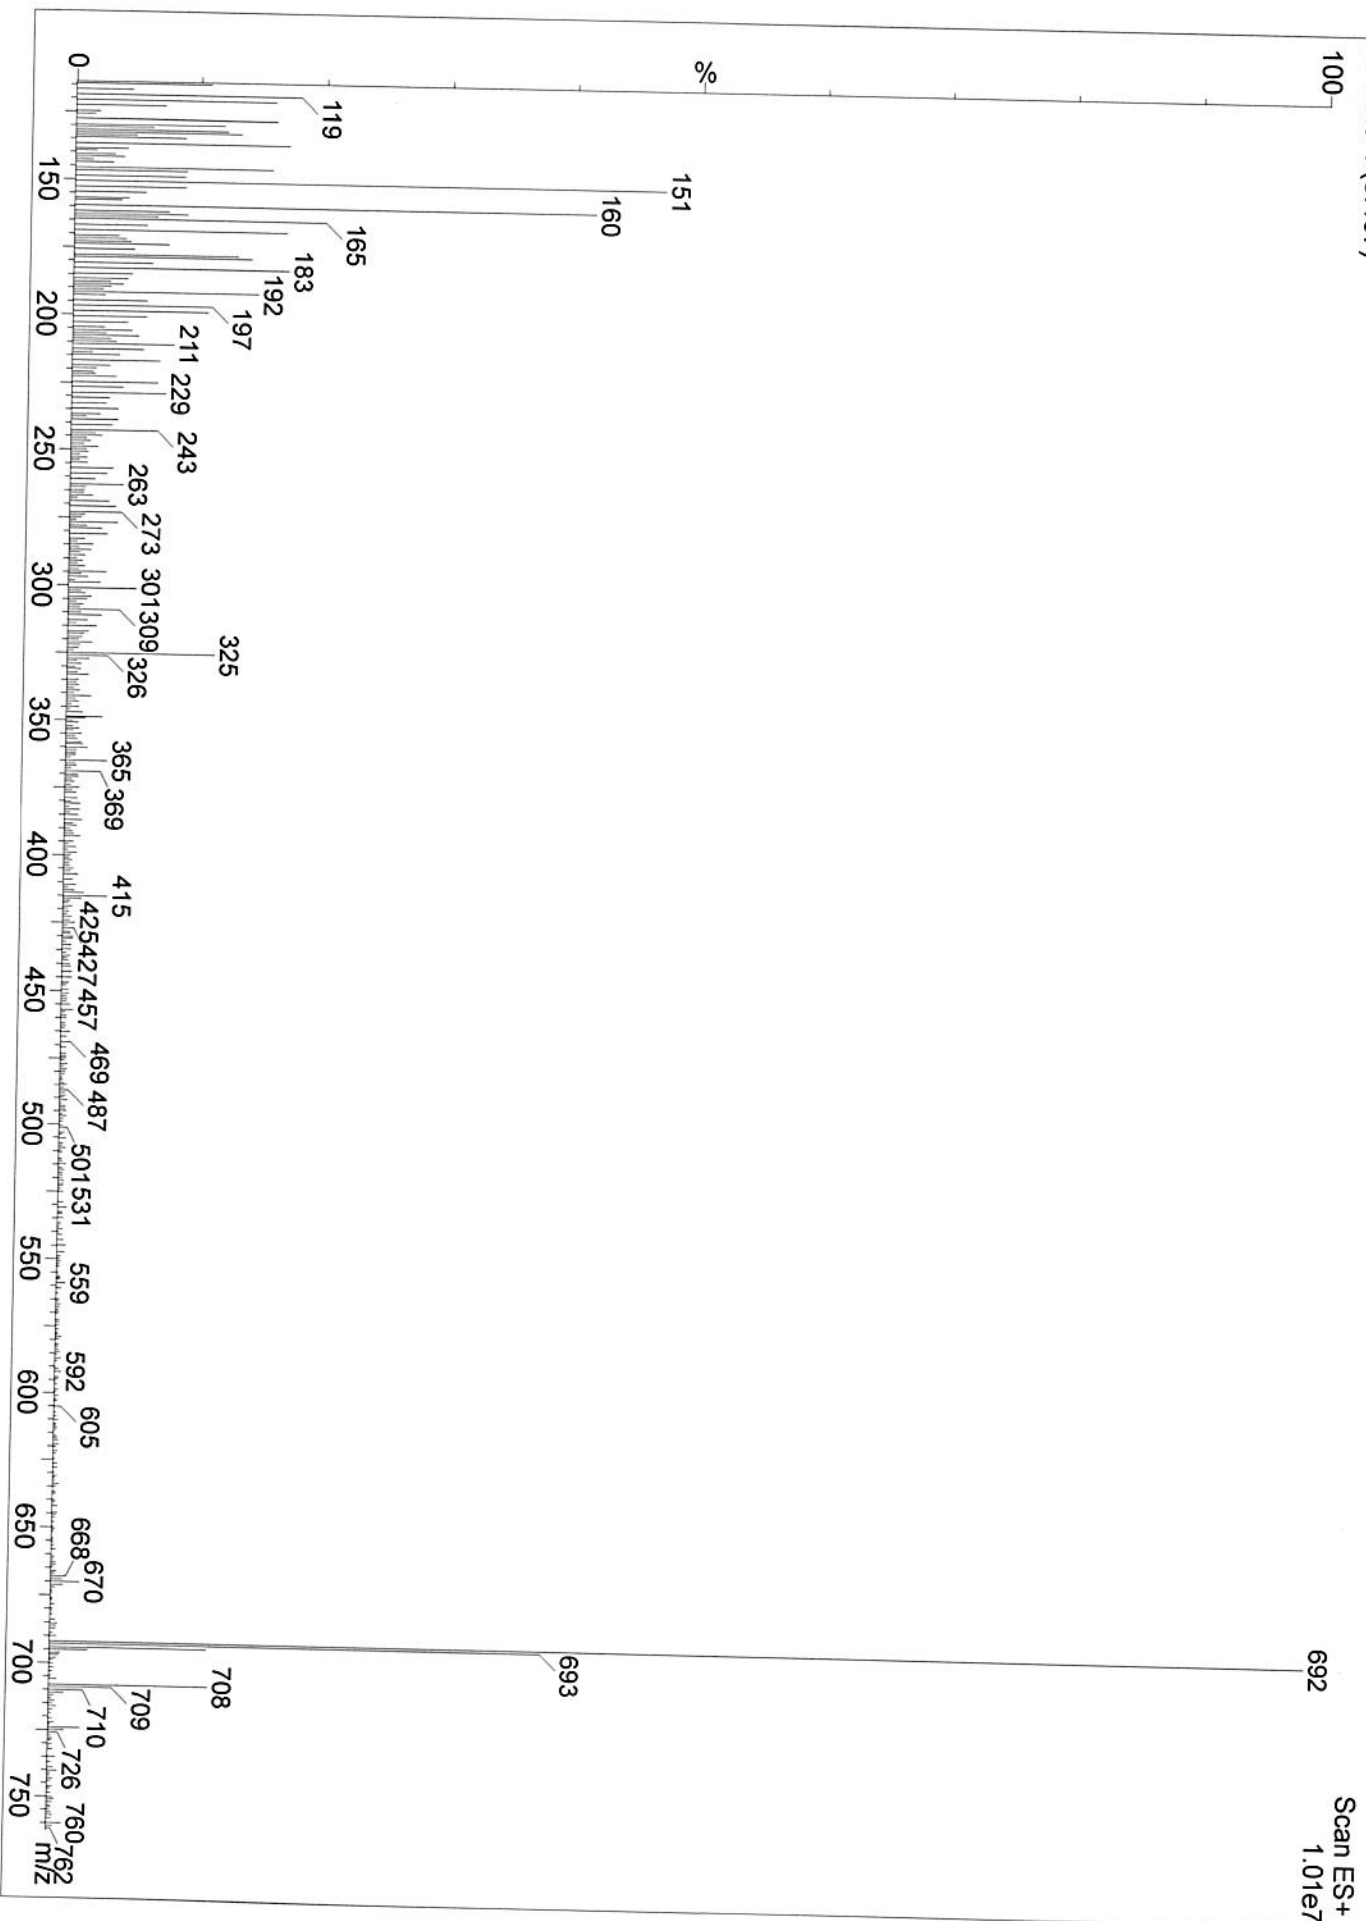

Scan ES+  
1.01e7

Hybrid 008

SPIN29 (0.102) Cu (0.20); Is (1.00,1.00) C37H35N9O4Na1

Scan ES+  
6.41e12

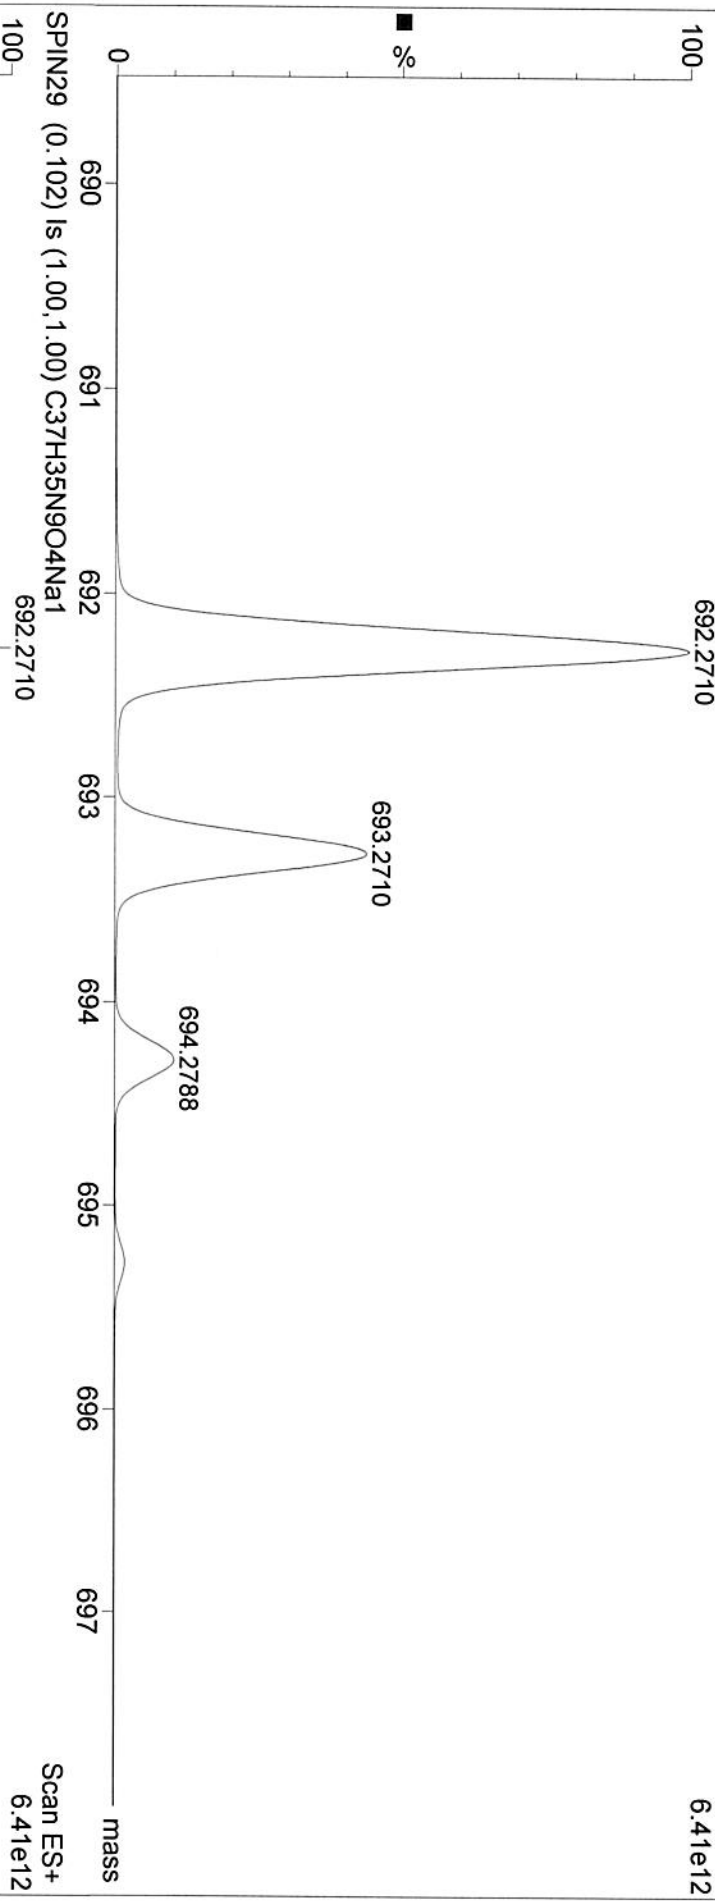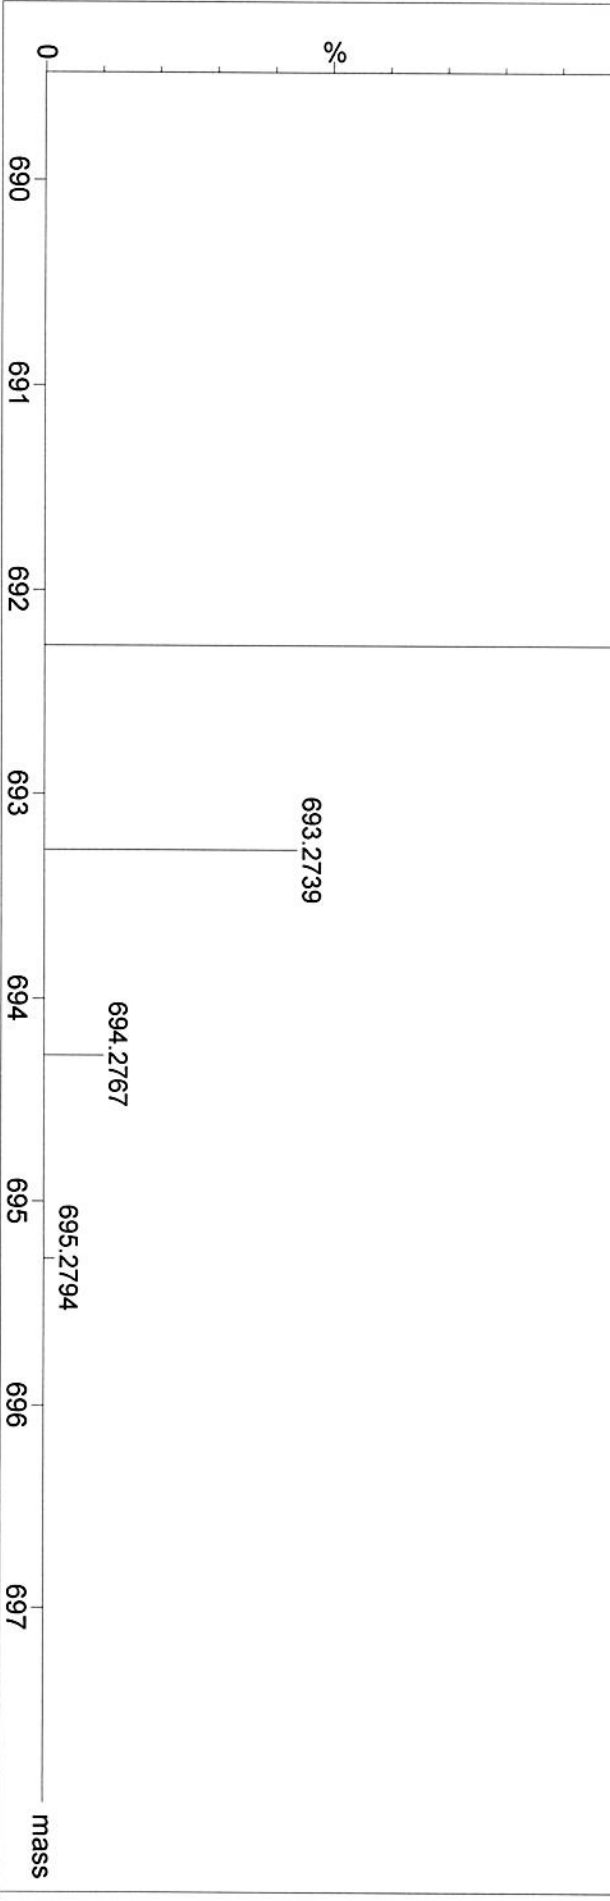

Hybrid 019 bn

Molecular Structure Research Centre, Yerevan, Armenia, Varian Mercury-300VX

HA-1016

H1 300.088 MHz, nt = 16, np = 32000, temp = 30.0 C, lb = -0.2, solvent = DMSO/CDCl4 1/3

NOCT\_19 ha-1016

Mar 4 2019

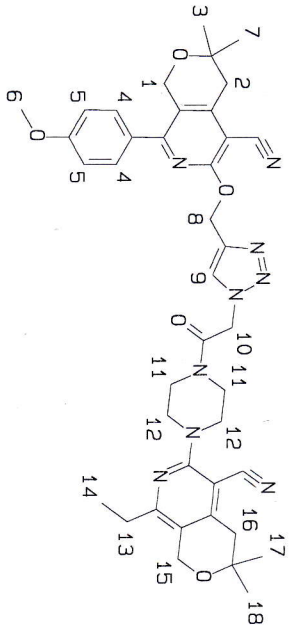

C<sub>40</sub>H<sub>45</sub>N<sub>9</sub>O<sub>5</sub>

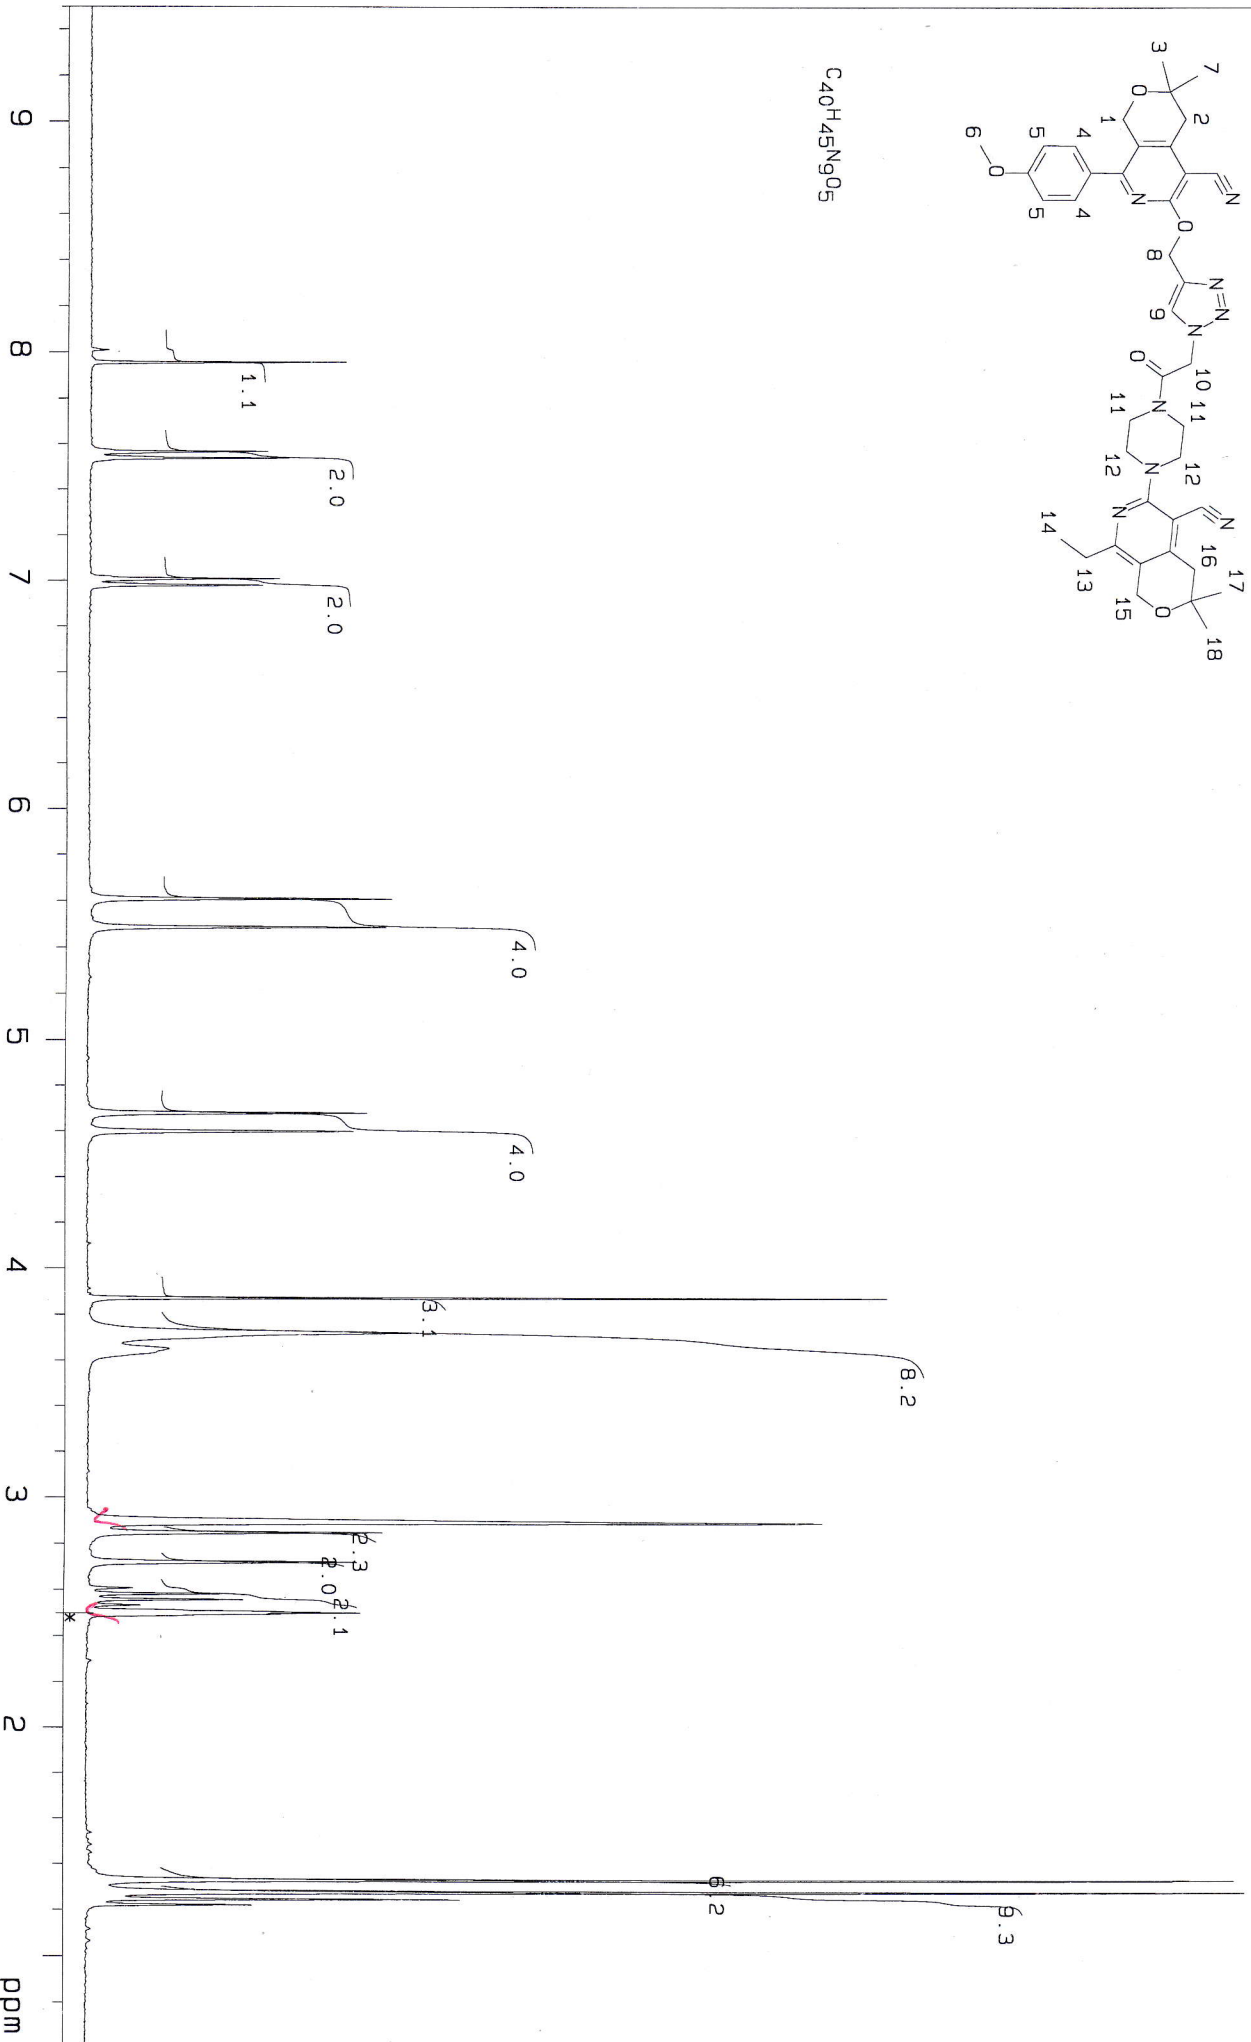

+



HA-1016

Molecular Structure Research Centre, Yerevan, Armenia, Varian Mercury-300VX

C-13 75.465 MHz, nt = 1024, np = 19998, temp = 30.0 C, lb = 1.0, solvent = DMSO/C4 1/3

NOCI\_19 ha-1016

Mar 4 2019

Gr hybrid 013

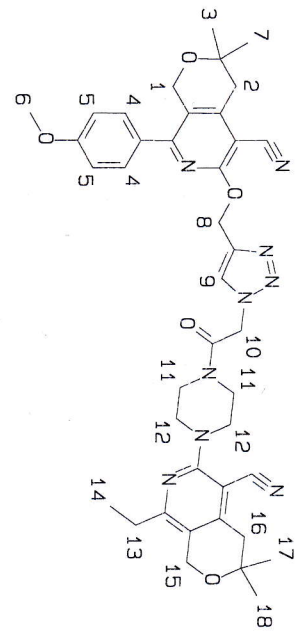

C<sub>40</sub>H<sub>45</sub>N<sub>9</sub>O<sub>5</sub>

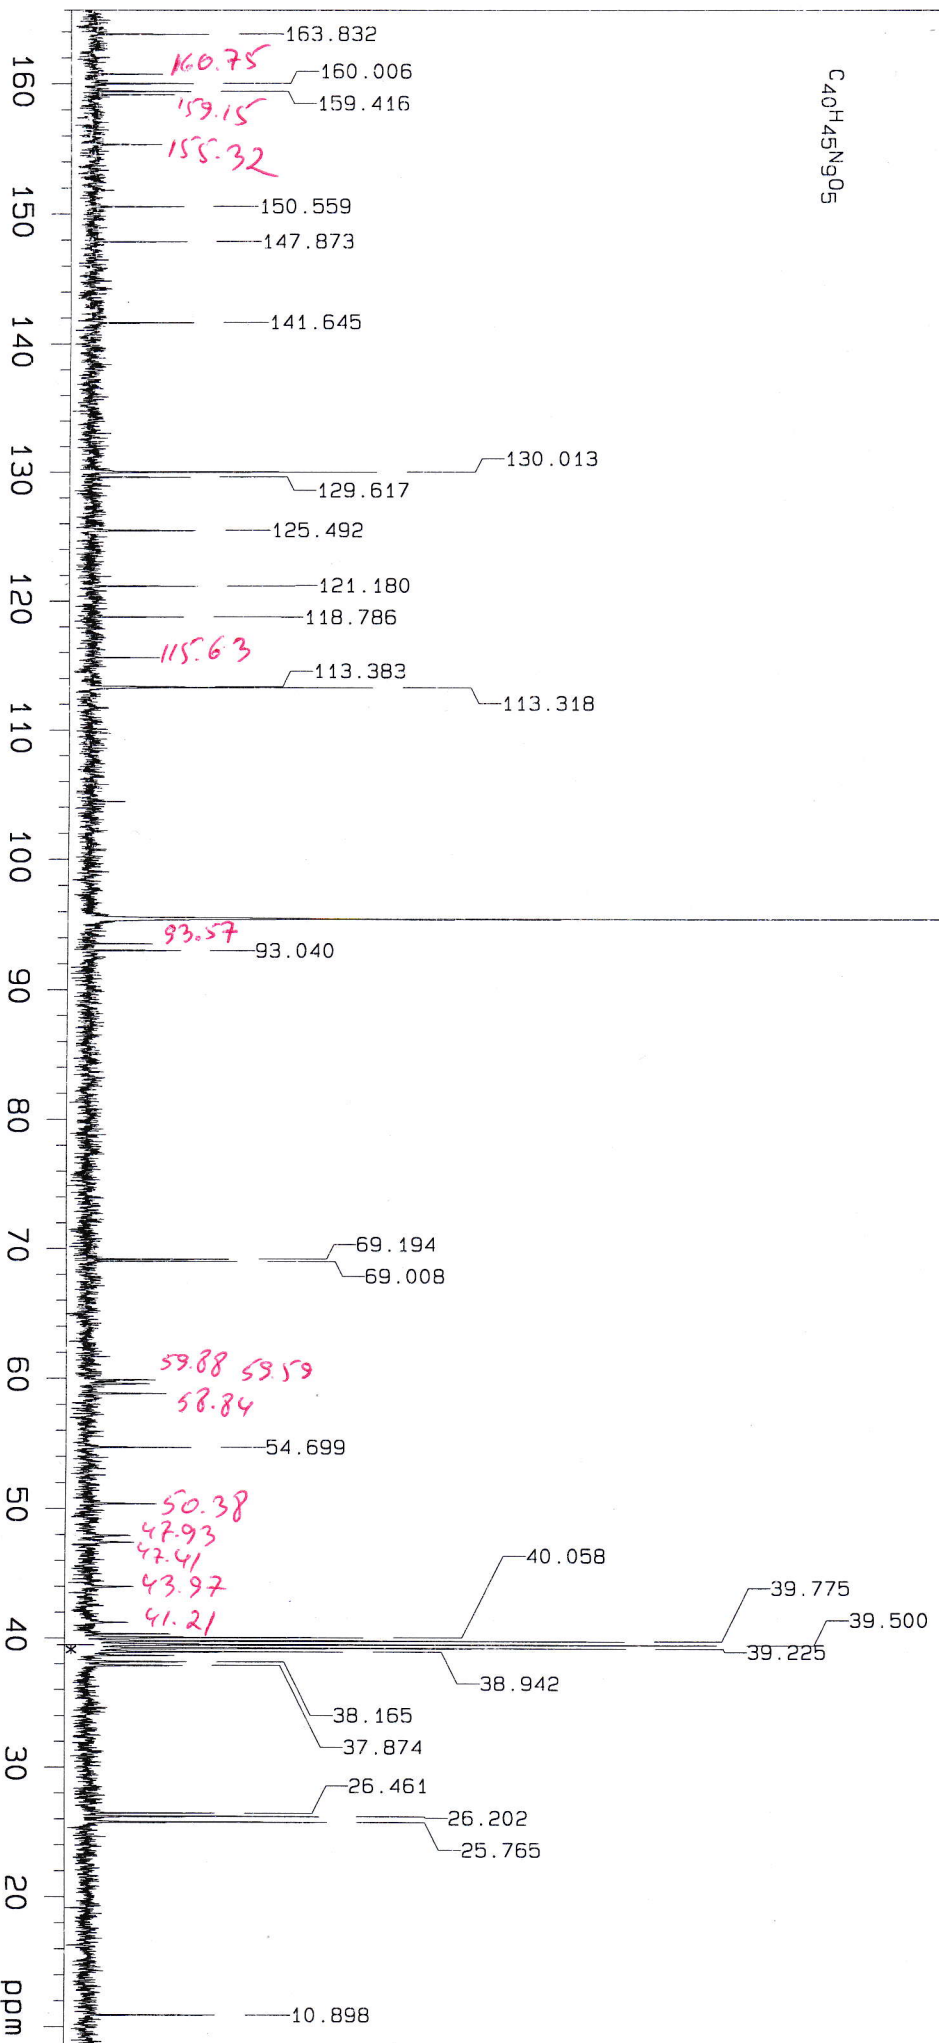

+  
[Signature]

Hybrid 019  
SPIN40 4 (0.407)

Scan ES+  
3.66e6

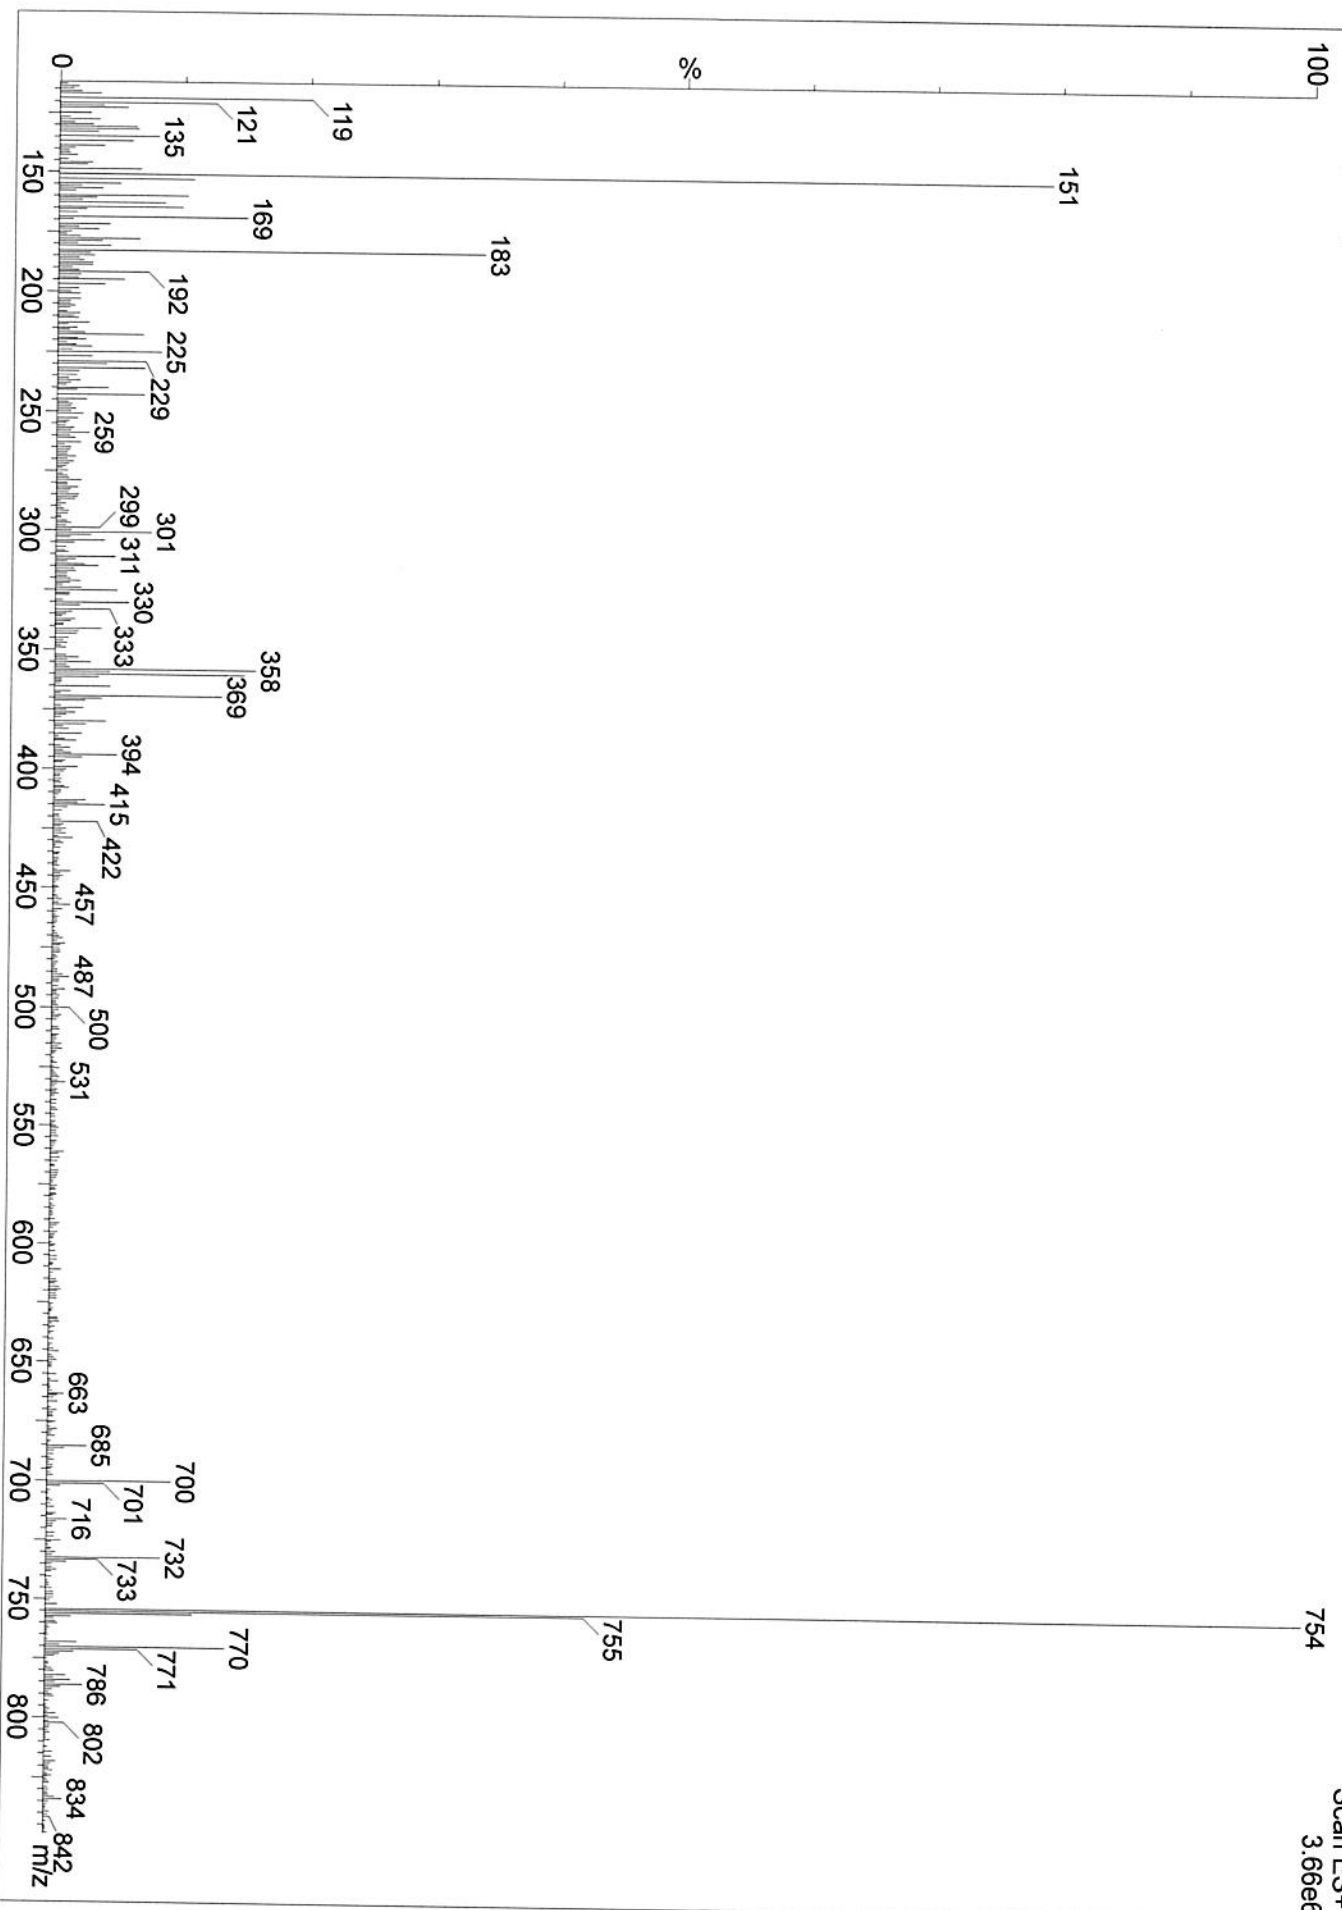

Hybrid 019

SPIN40 (0.102) Cu (0.20); Is (1.00,1.00) C40H45N9O5Na1

Scan ES+  
6.19e12

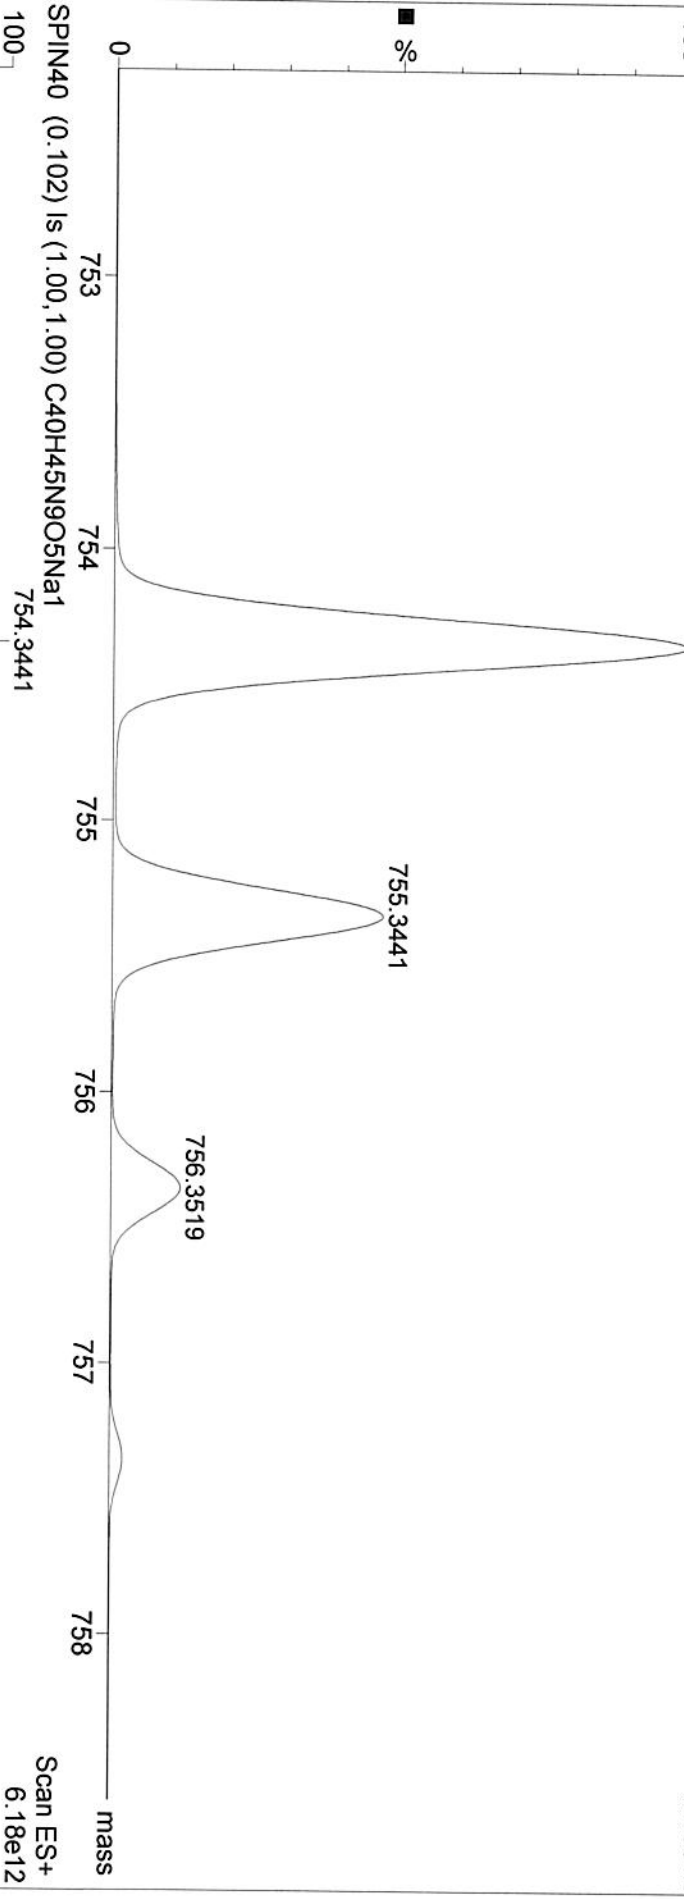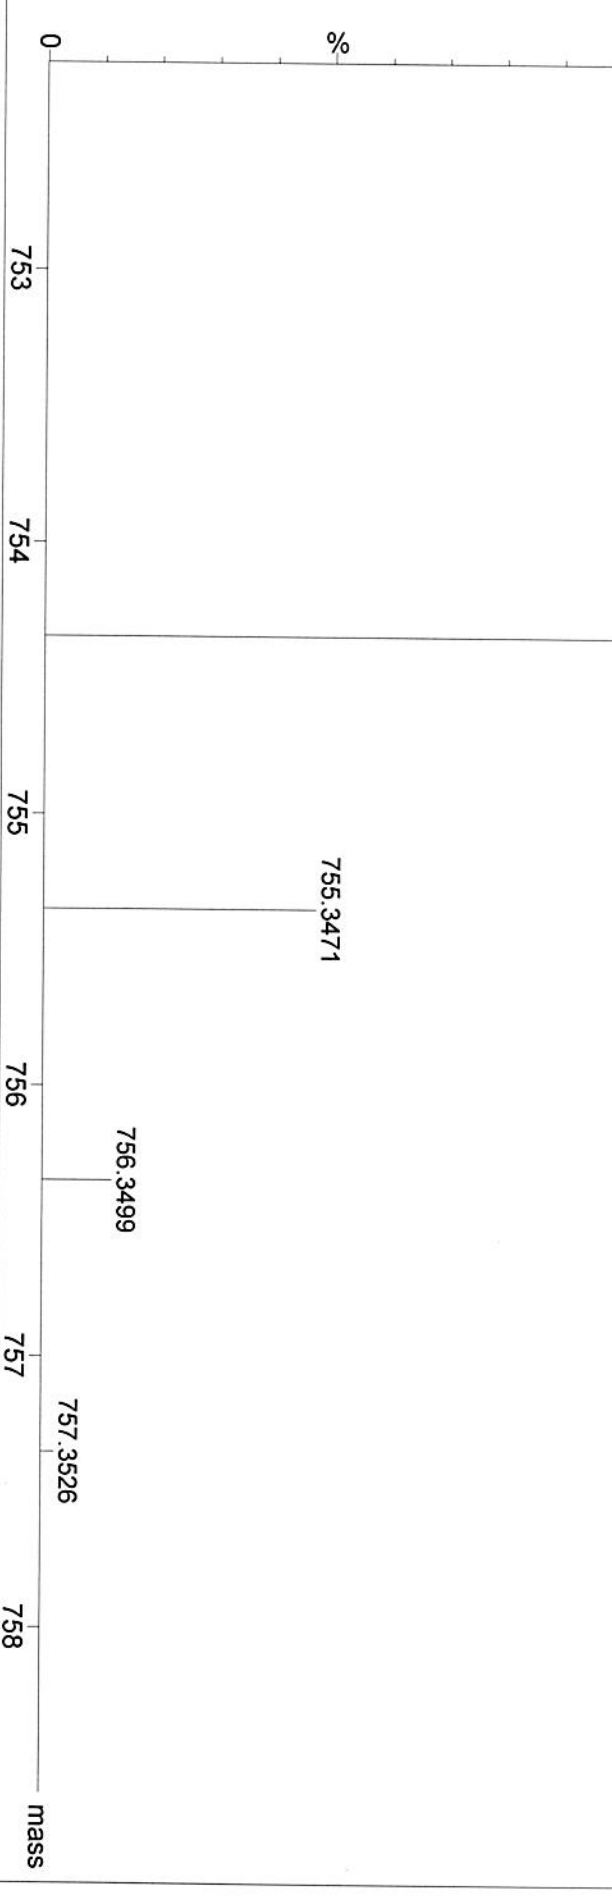

Hybrid 016 60

Molecular Structure Research Centre, Yerevan, Armenia, Varian Mercury-300VX  
HA-1005

H1 300.088 MHz, nt = 16, np = 32000, temp = 30.0 C, lb = -0.2, solvent = DMSO/CDCl4 1/3

SAMV\_19 ha-1005

Feb 8 2019

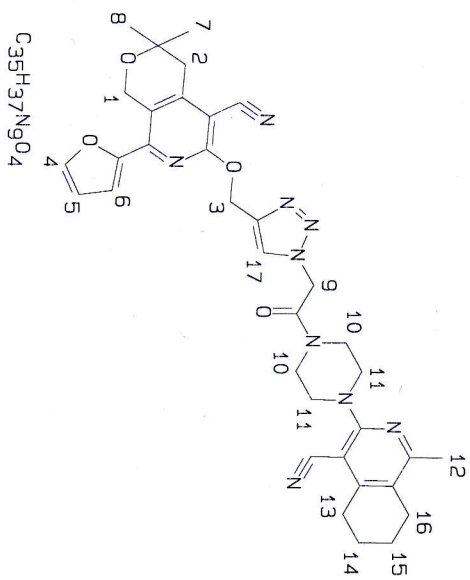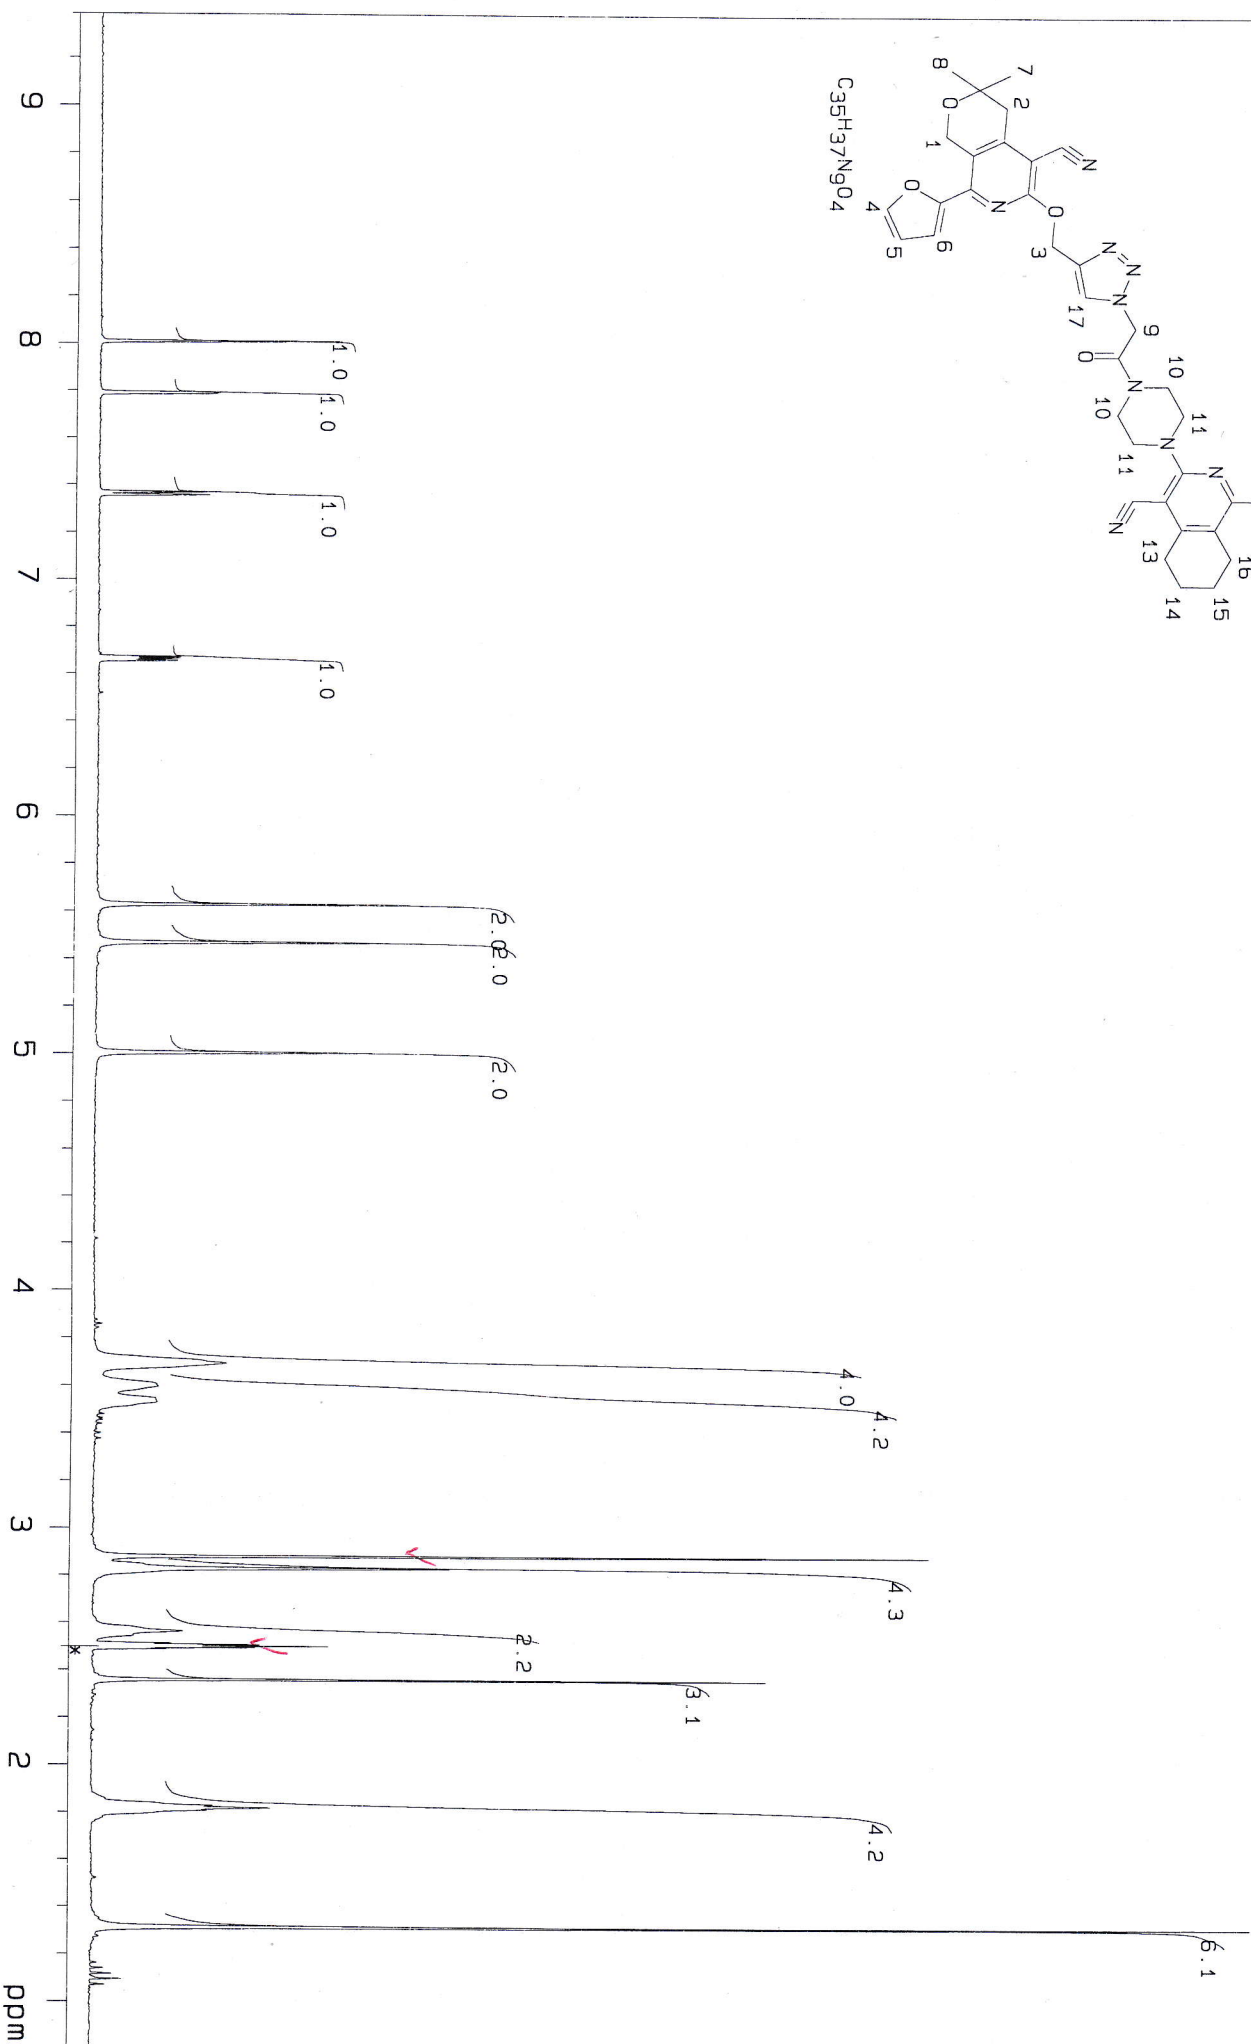

*Handwritten signature*

HA-1005

60 Hybrid 016

C13 75.465 MHz, nt = 640, np = 19998, temp = 30.0 C, lb = 1.0, solvent = DMSO-CD4 1/3

SAWV\_19 ha-1005

Feb 8 2019

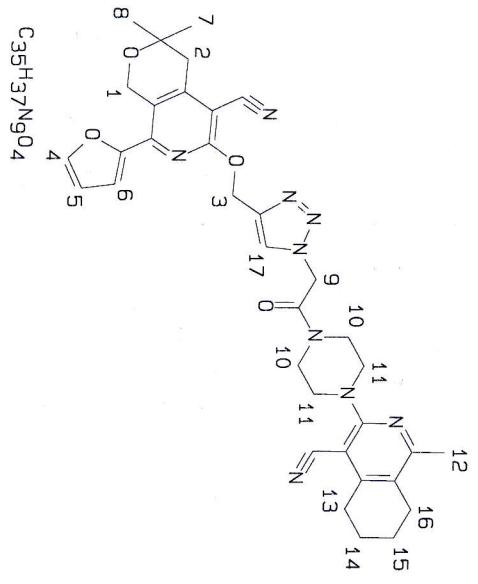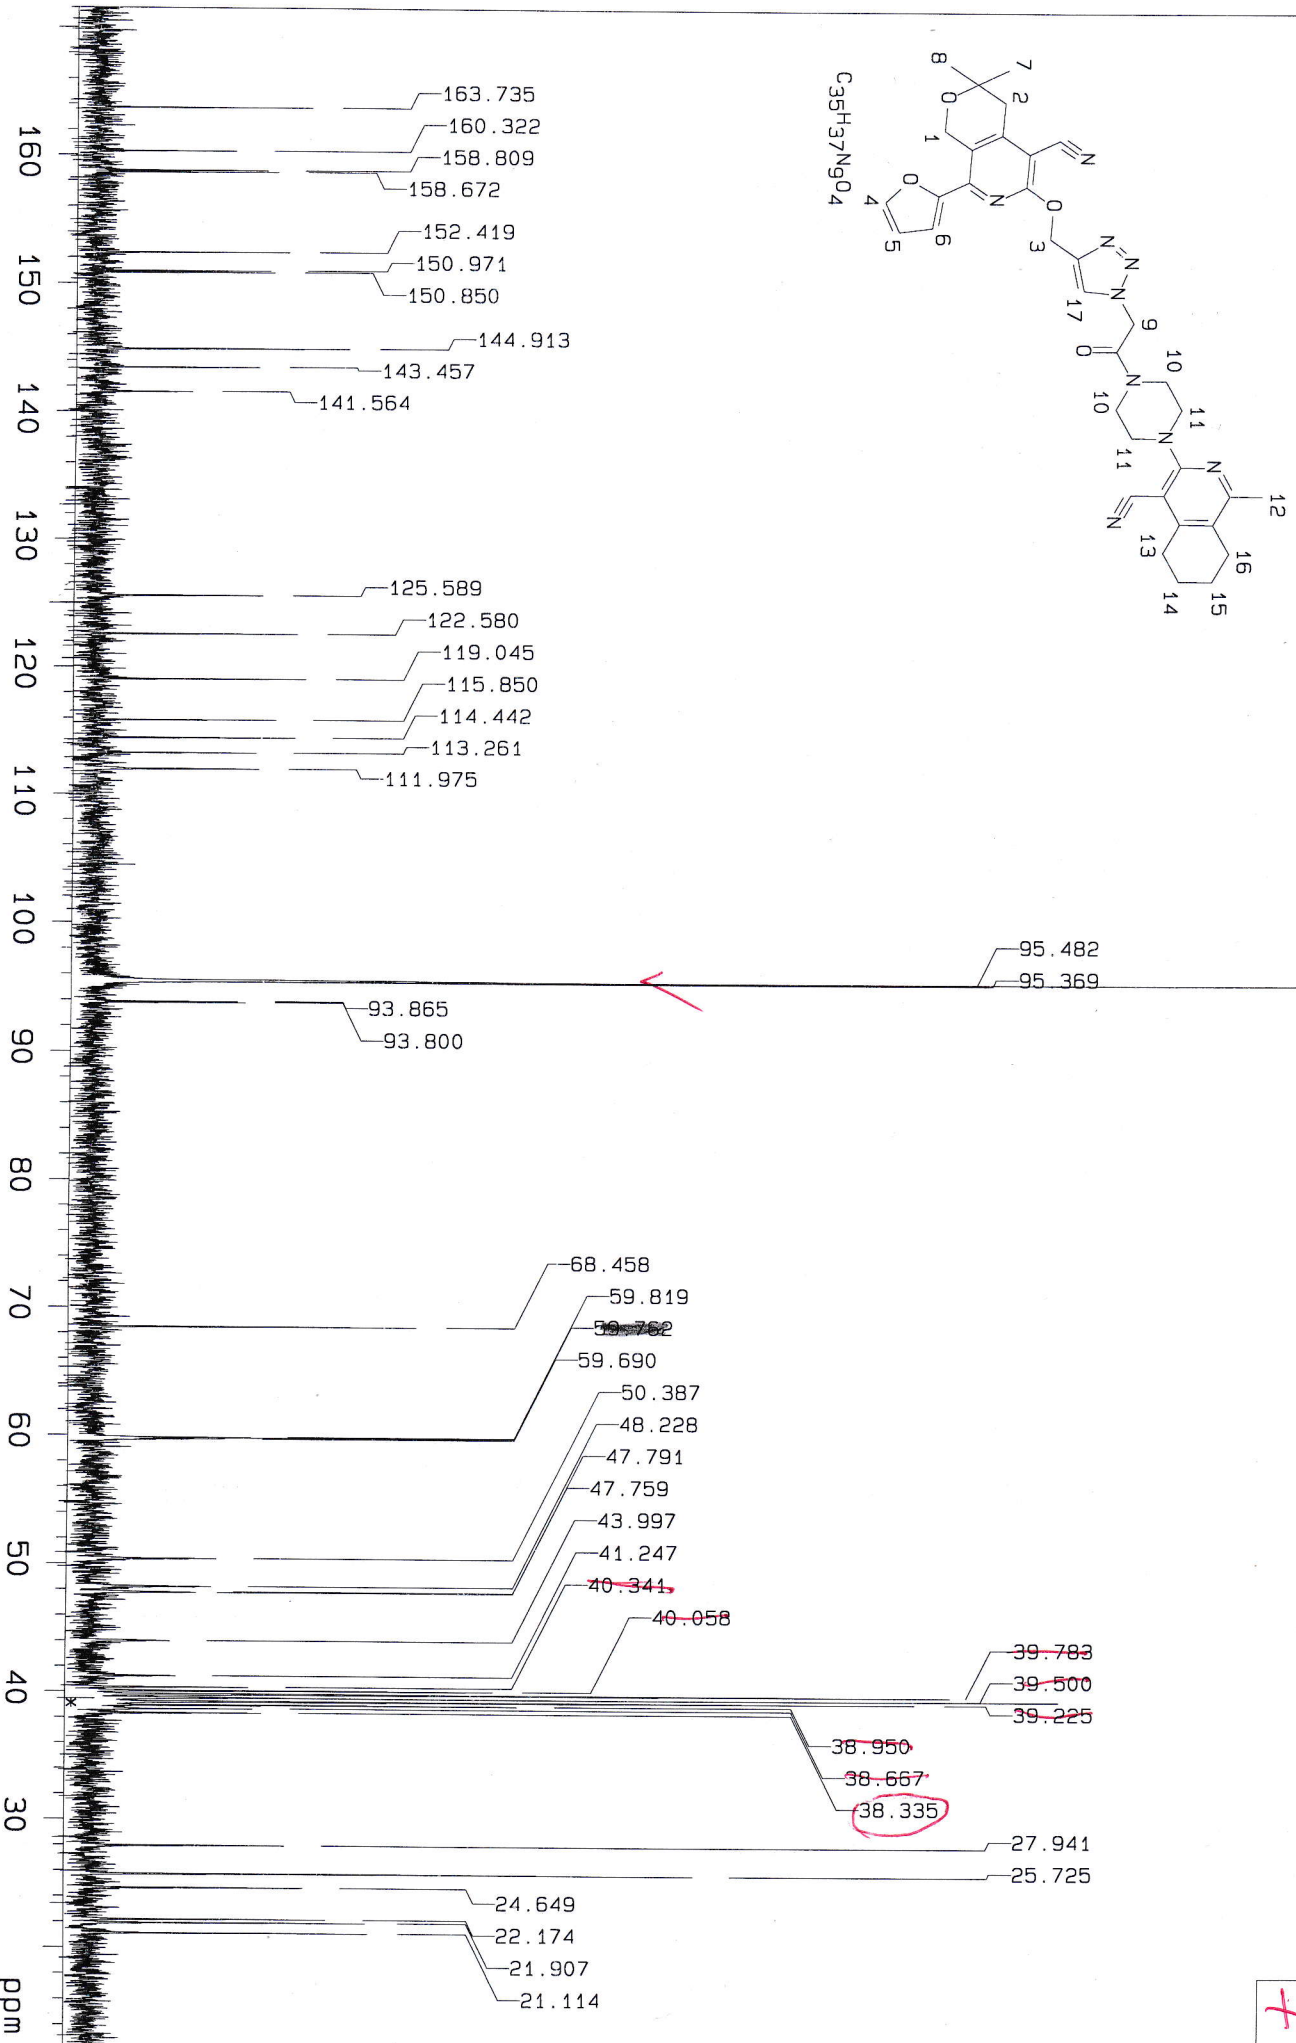

+ [Signature]

Hybrid 016

SPIN37 7 (0.713)

100

Scan ES+  
5.99e6

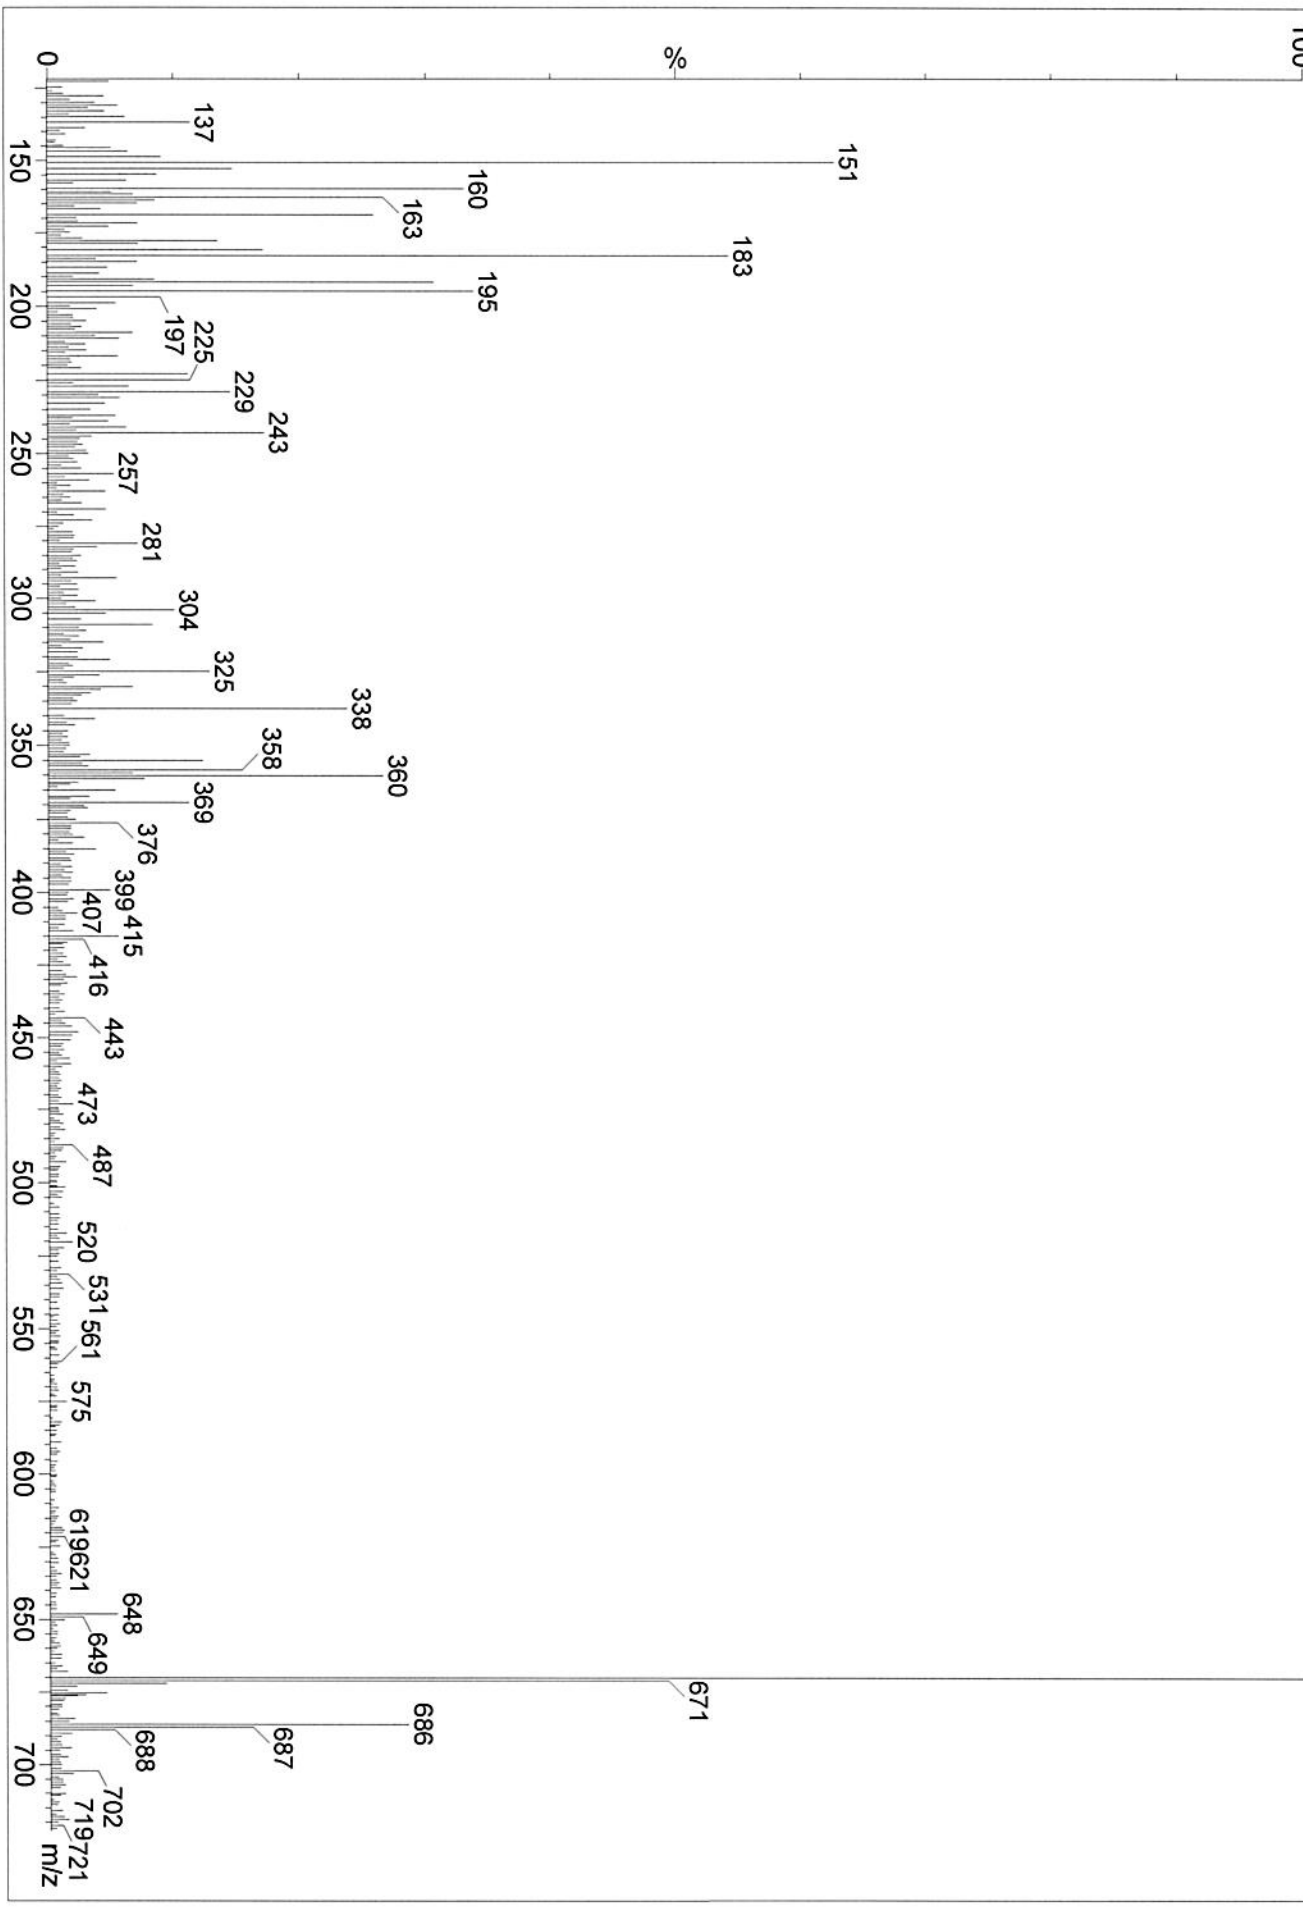

Hybrid 016

SPIN37 (0.102) Cu (0.20); Is (1.00,1.00) C35H37N9O4Na1

Scan ES+  
6.55e12

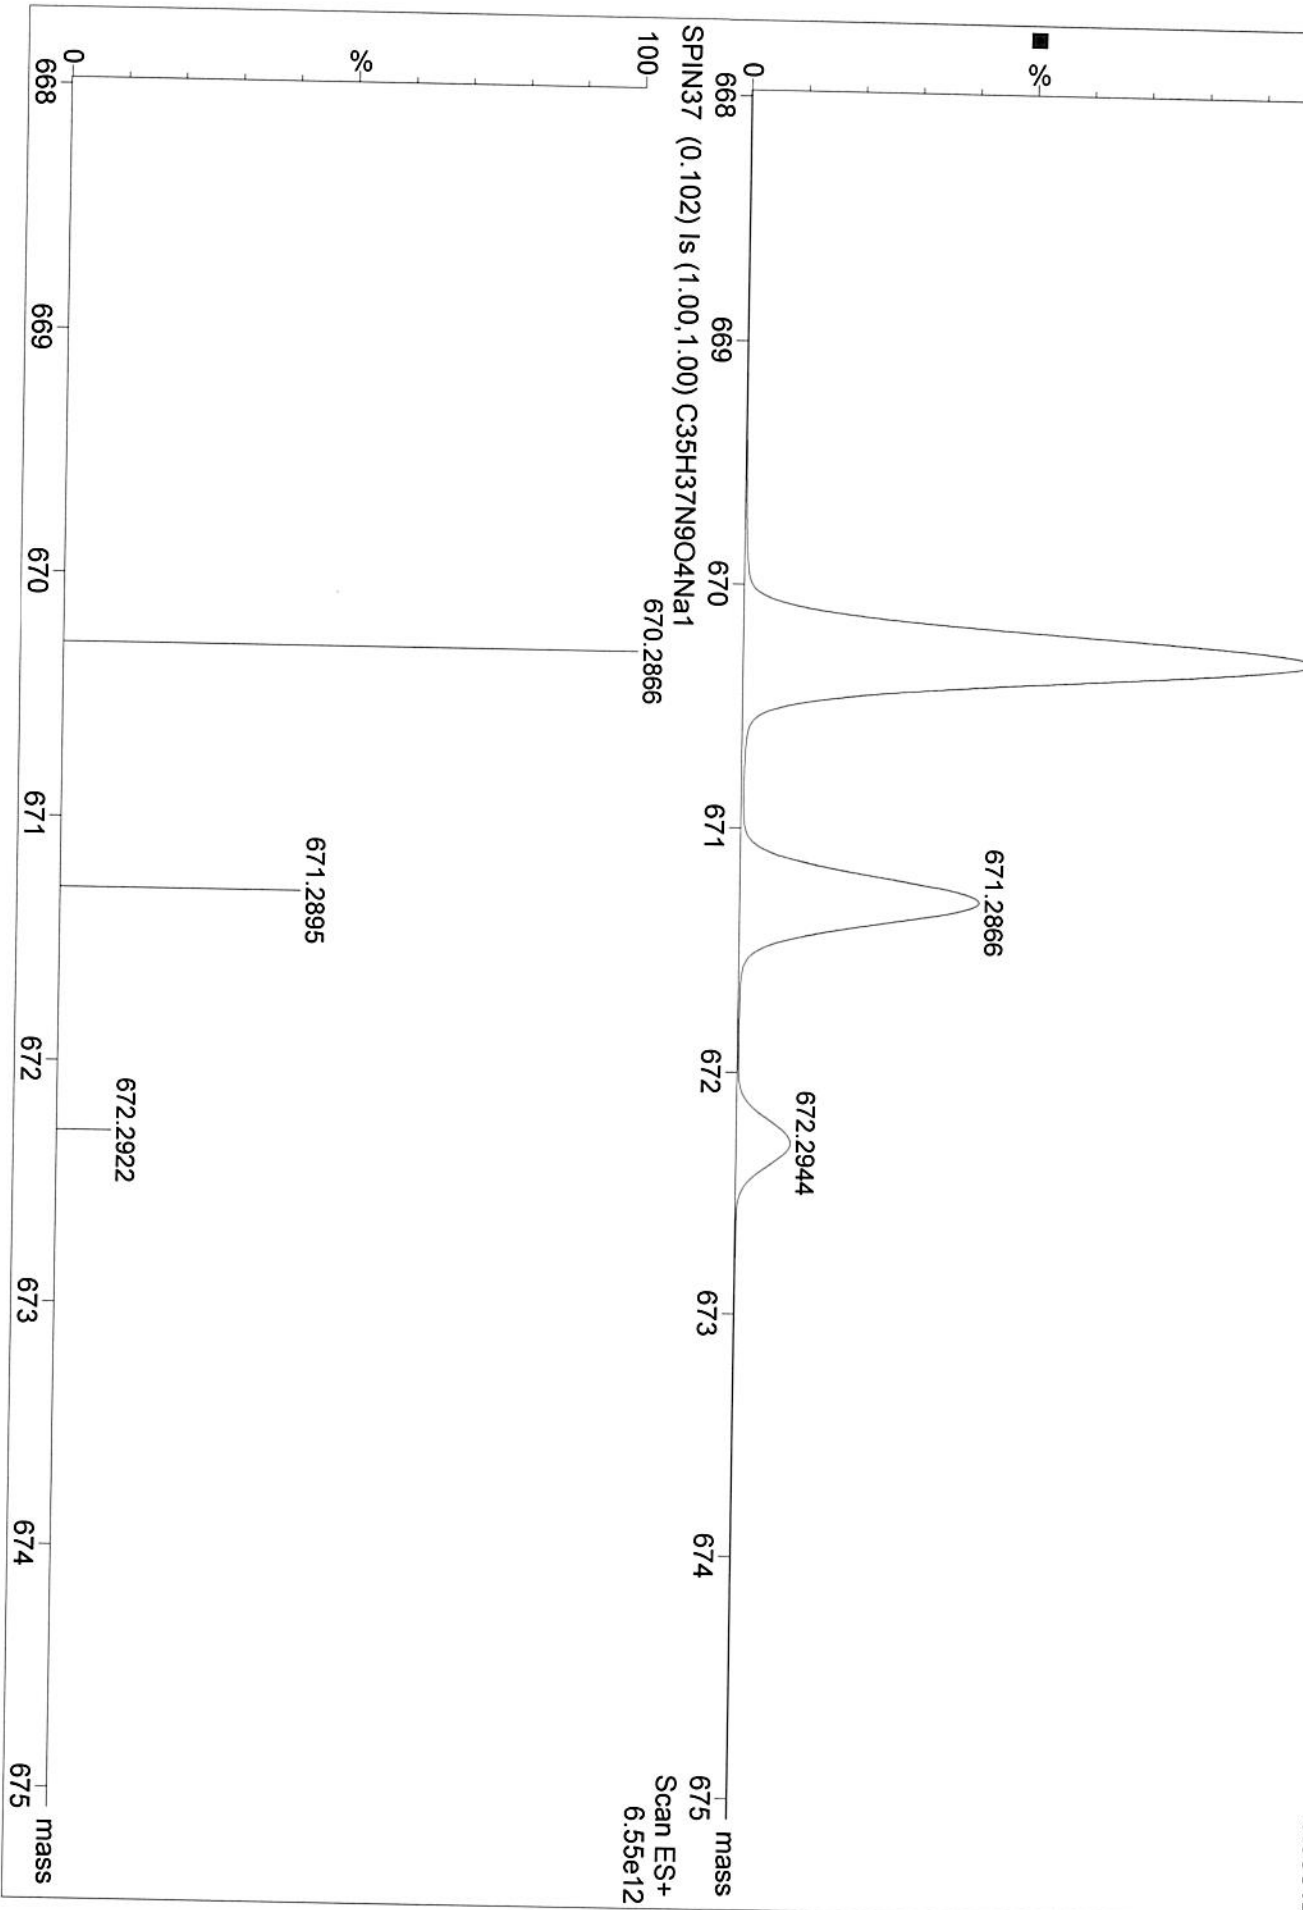



Hybrid 017  
6P

Molecular Structure Research Centre, Yerevan, Armenia, Varian Mercury-300VX  
HA-1116

H1 300.088 MHz, nt = 16, mp = 32000, temp = 30.0 C, lb = -0.2, solvent = DMSO

ANUSH\_TEMA ha-1116

Mar 11 2021

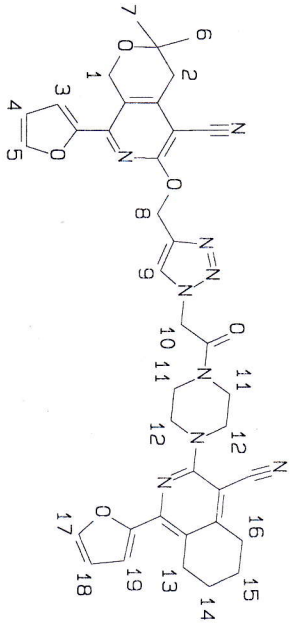

C<sub>38</sub>H<sub>37</sub>N<sub>9</sub>O<sub>5</sub>

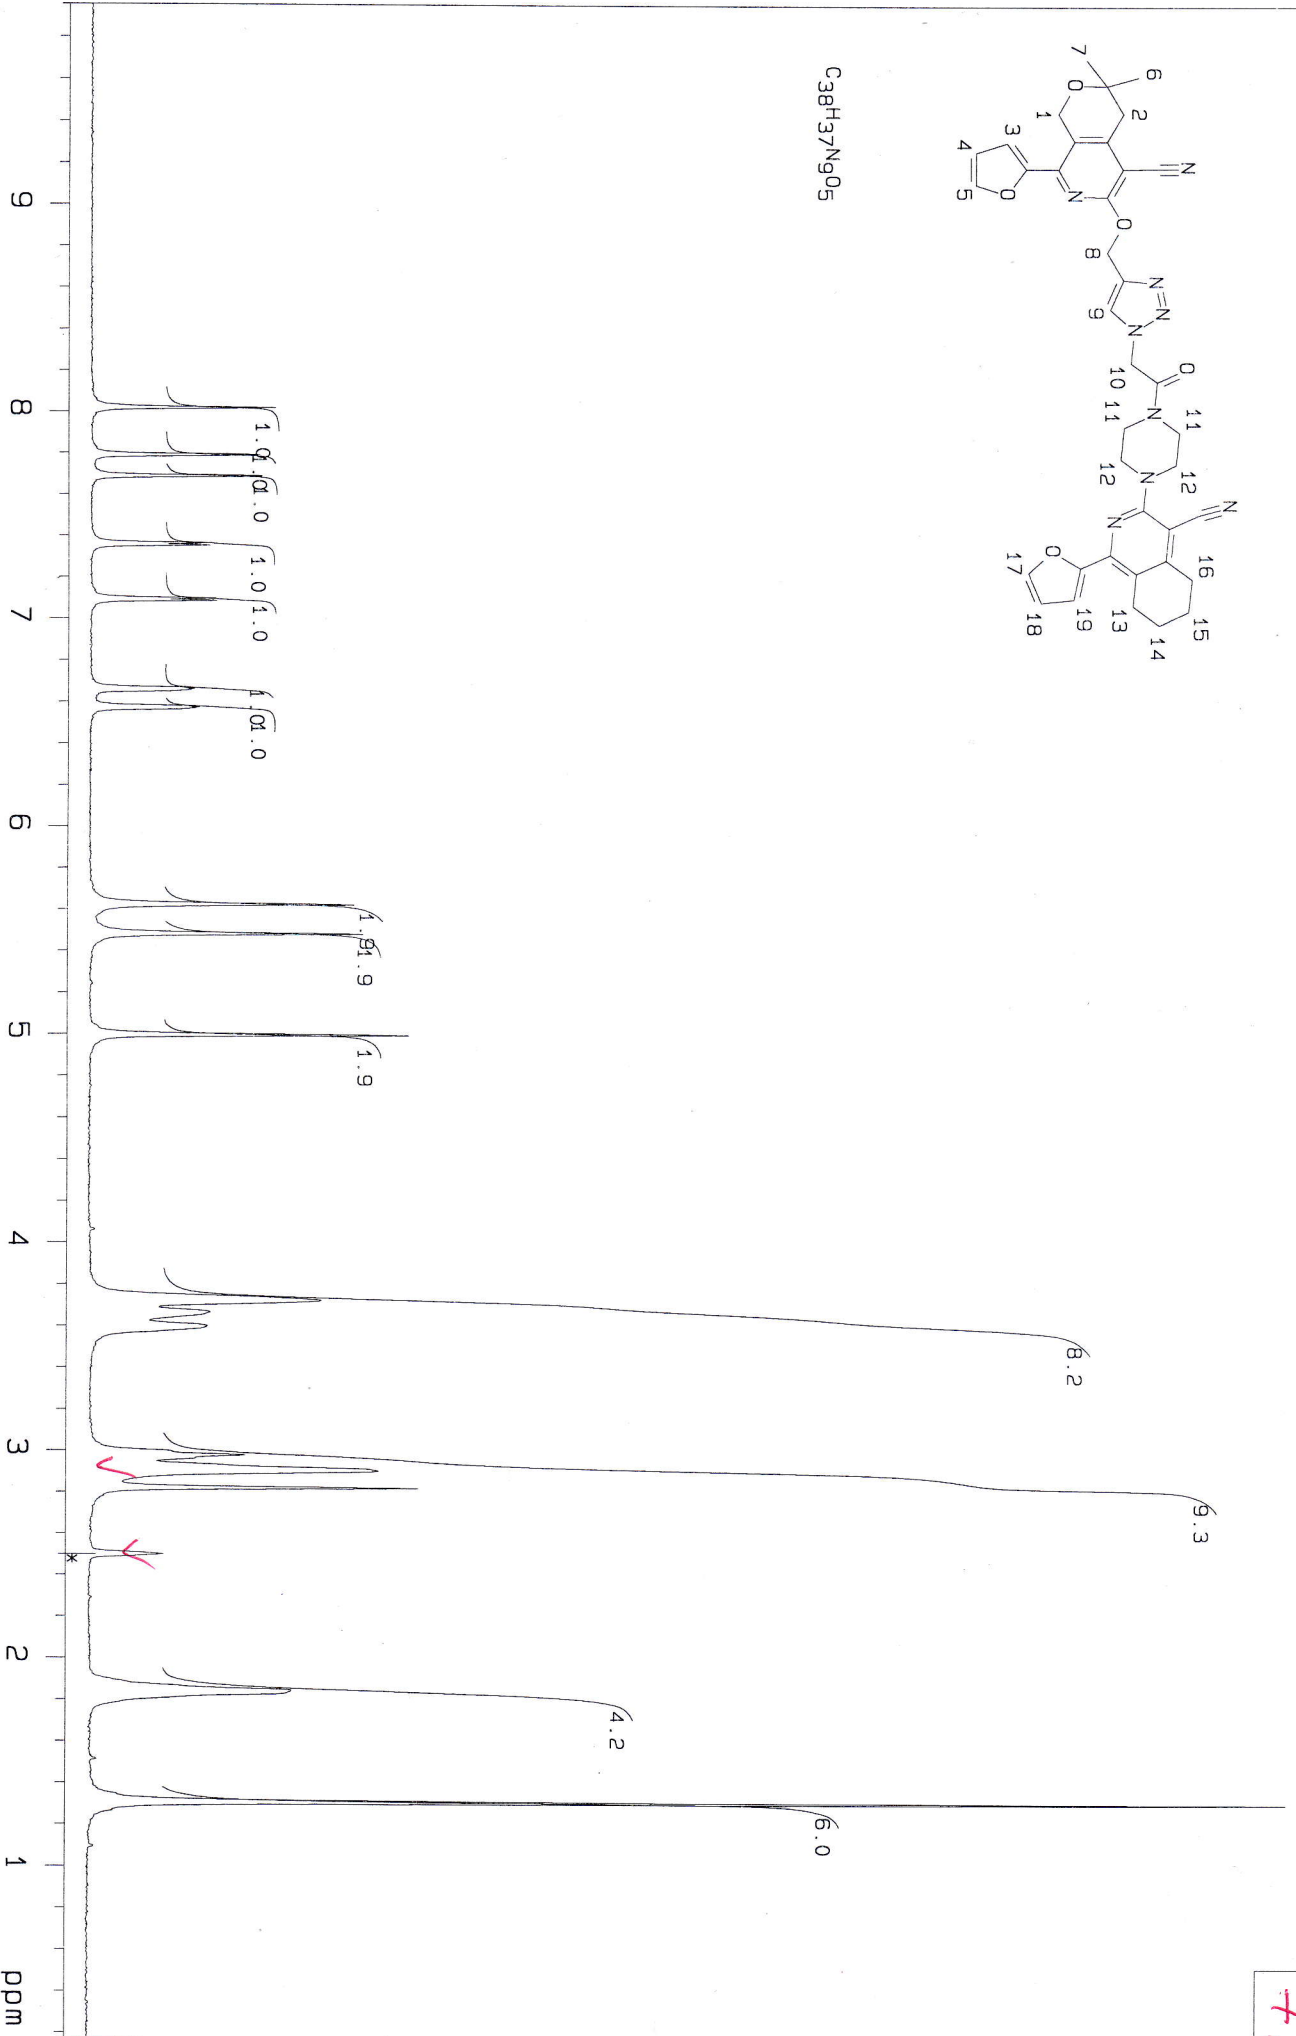

+

HA-1116

C 13 75.465 MHz, rt = 848, mp = 19998, temp = 30.0 C, lb = 1.0, solvent = DMSO/CDCl4 1/3

ANUSH\_TEMA ha-1116

Mar 11 2021

GP Hybrid 017

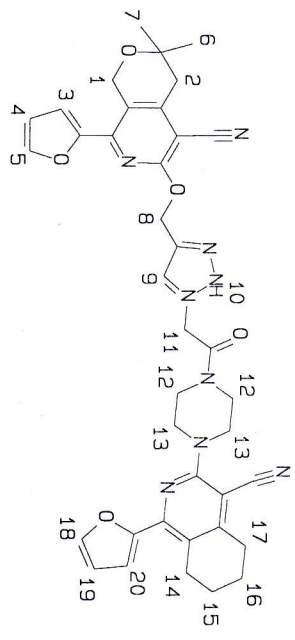

C<sub>38</sub>H<sub>37</sub>N<sub>9</sub>O<sub>5</sub>

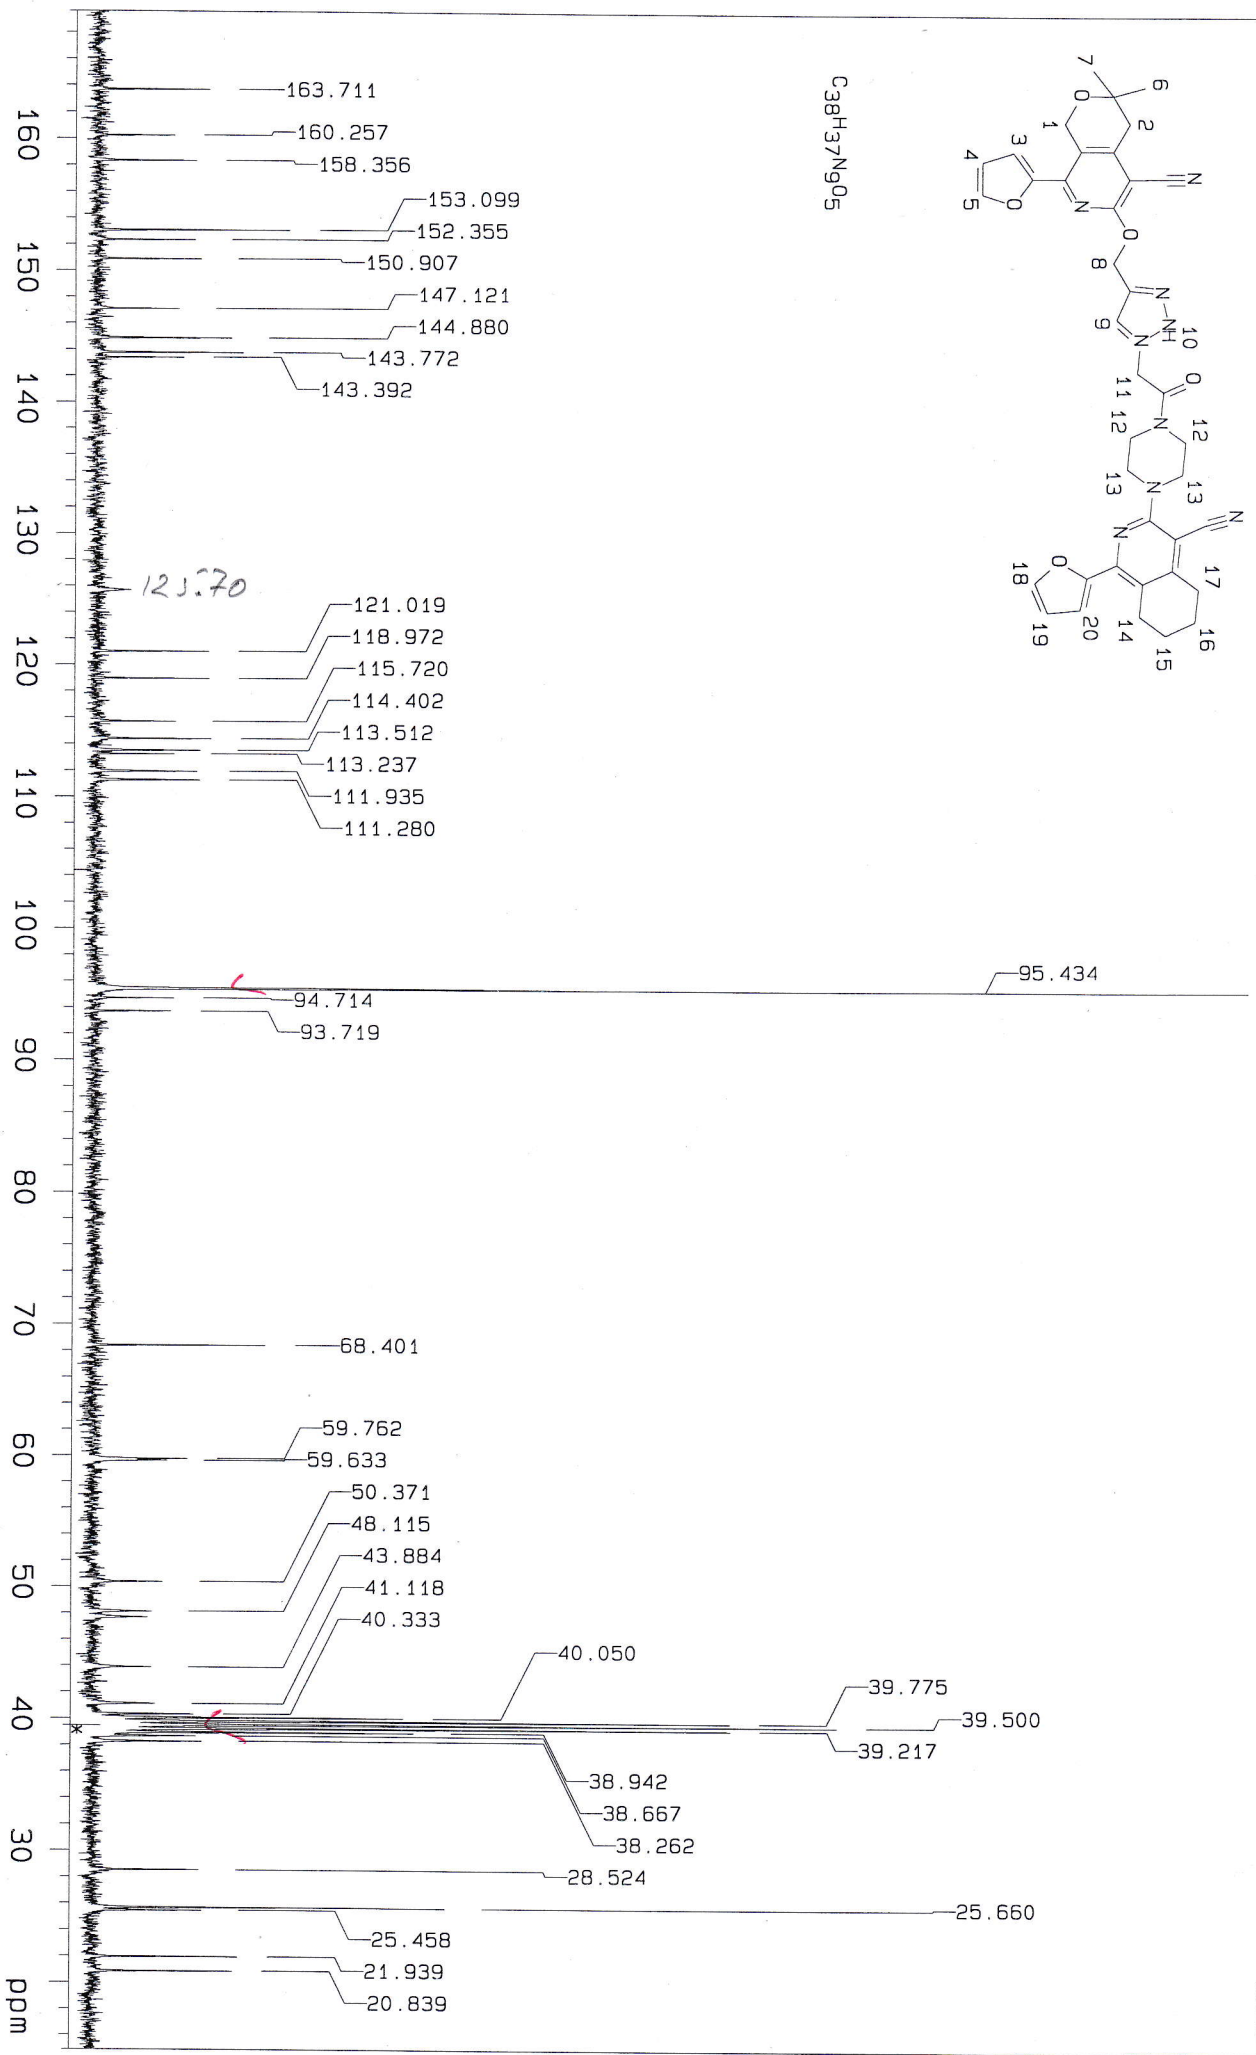

+ [Signature]

Hybrid 017  
SPIN38 4 (0.407)

Scan ES+  
4.24e6

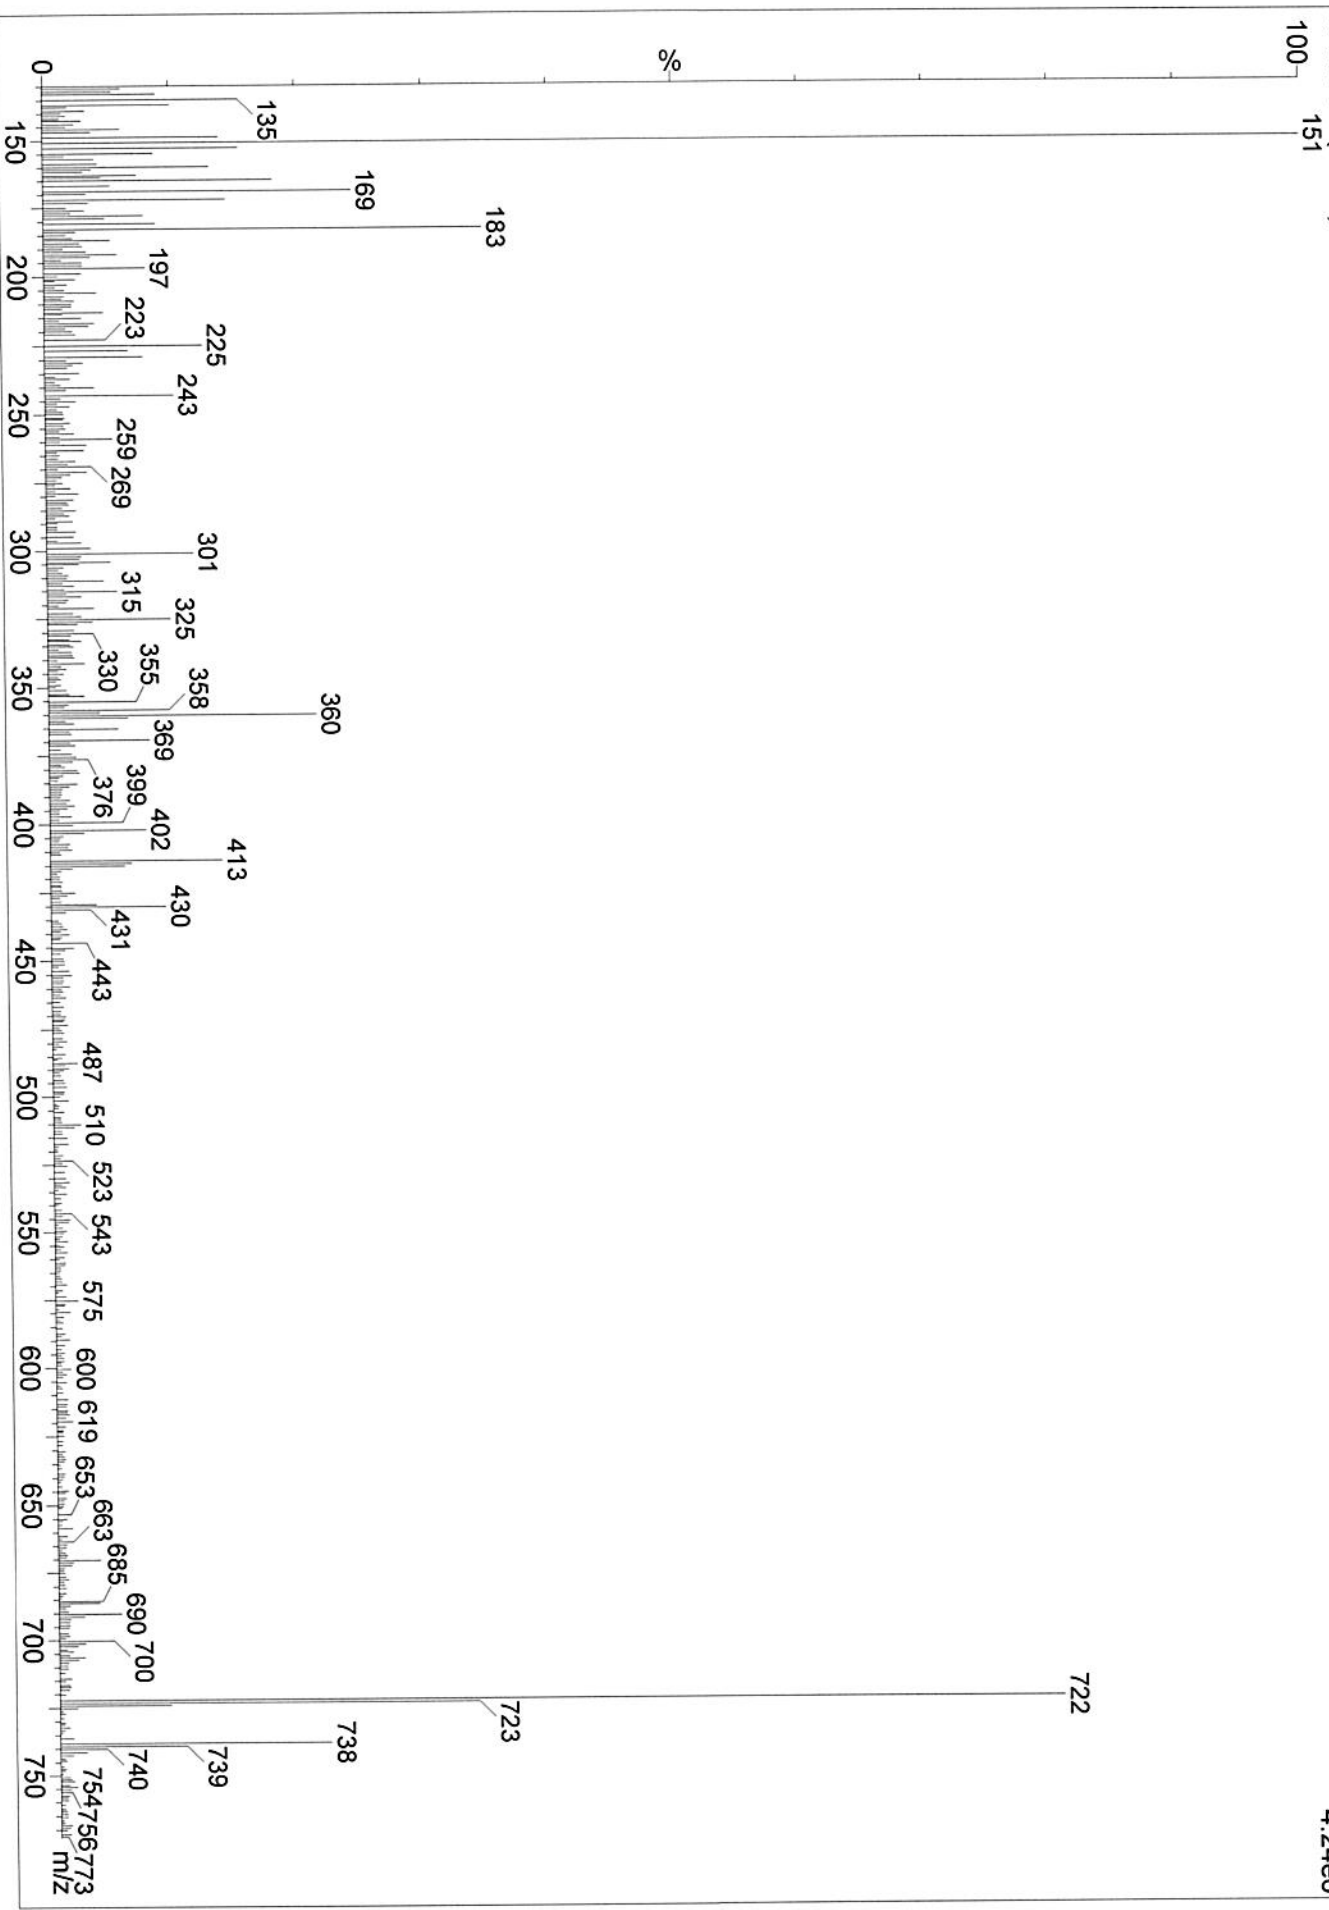

Hybrid 017

SPIN38 (0.102) Cu (0.20); Is (1.00, 1.00) C38H37N9O5Na1

Scan ES+  
6.33e12

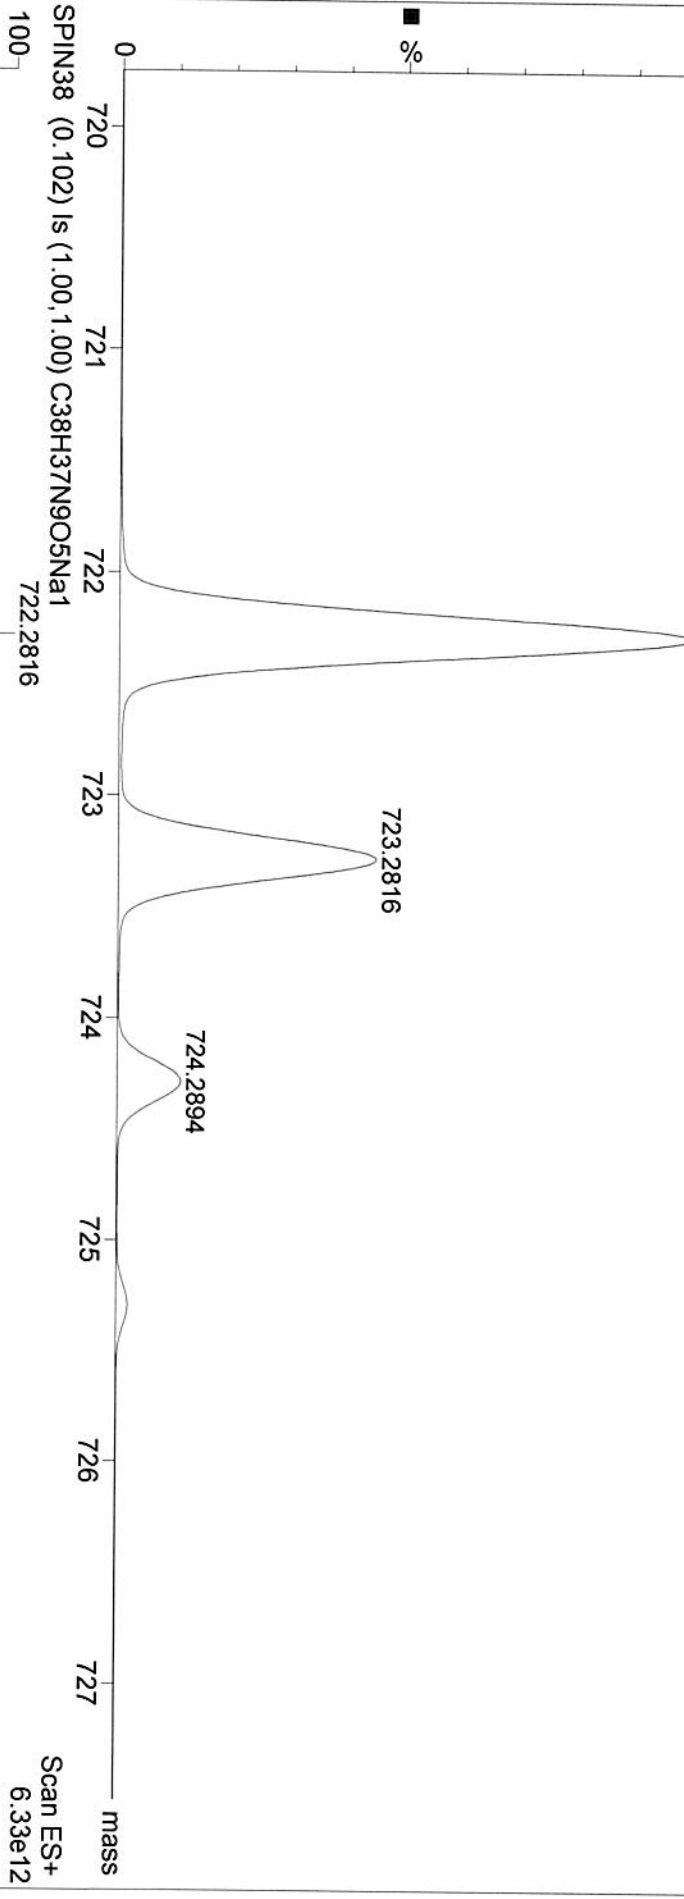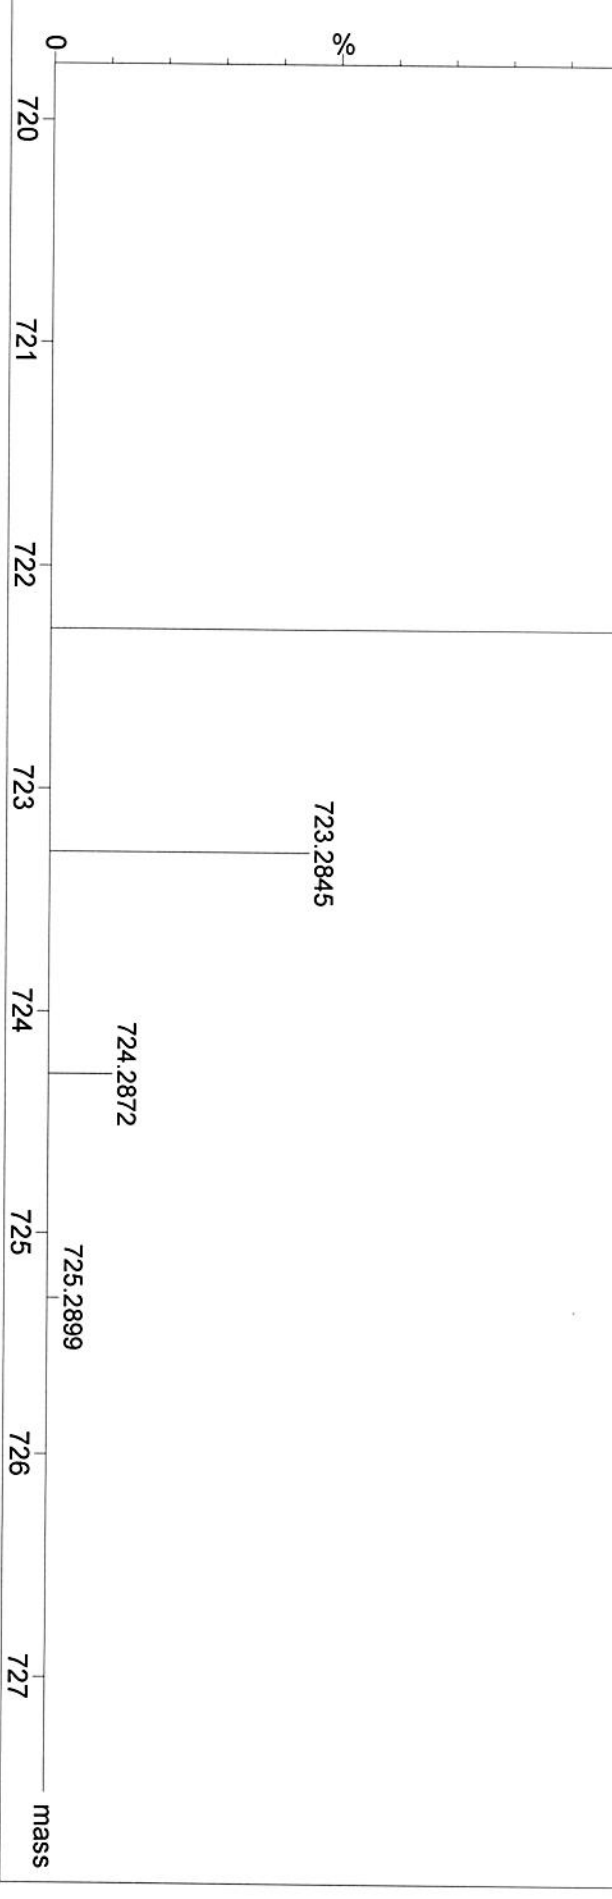



69 Hybrid 018

HA-1047 Molecular Structure Research Centre, Yerevan, Armenia, Varian Mercury-300VX

C13 75.465 MHz, nt=1440, mp=19998, temp=30.0 C, lb=1.0, solvent=DMSO/CDCl3

SAMV\_19 na=1047

Jun 19 2019

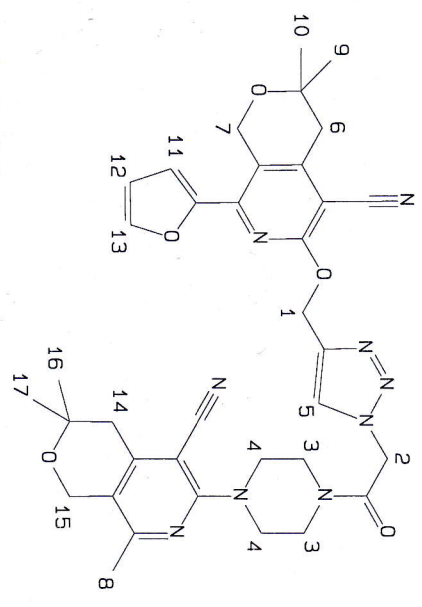

C<sub>36</sub>H<sub>39</sub>N<sub>9</sub>O<sub>5</sub>

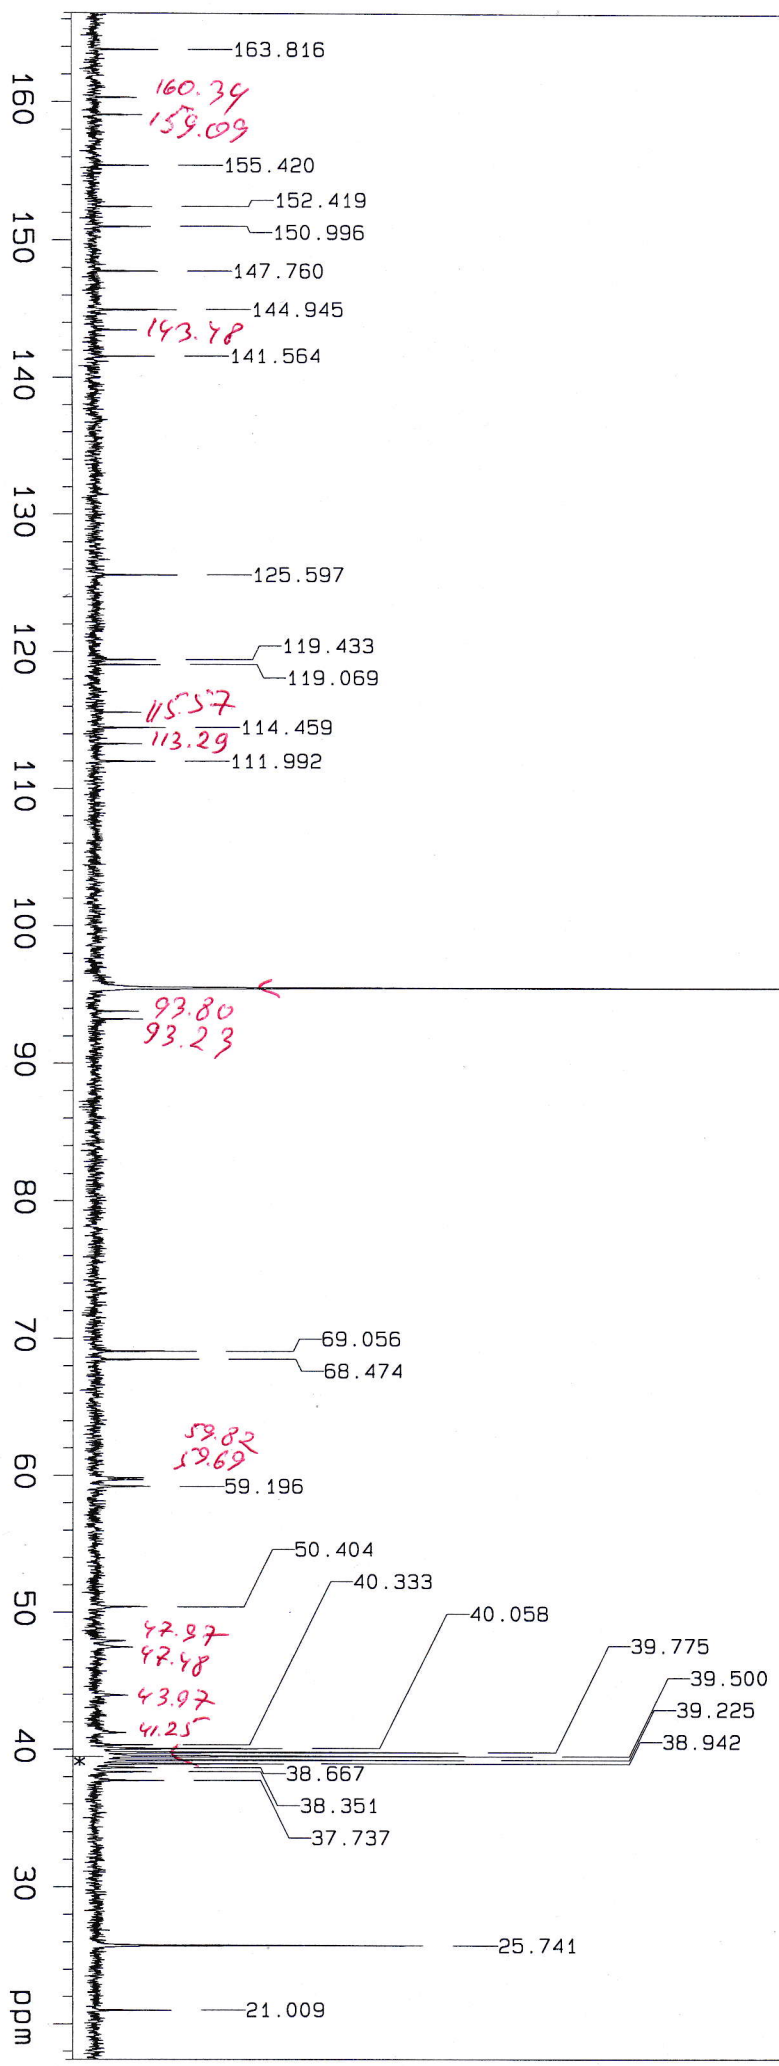

+

**Hybrid 018**

SPIN39 7 (0.713)

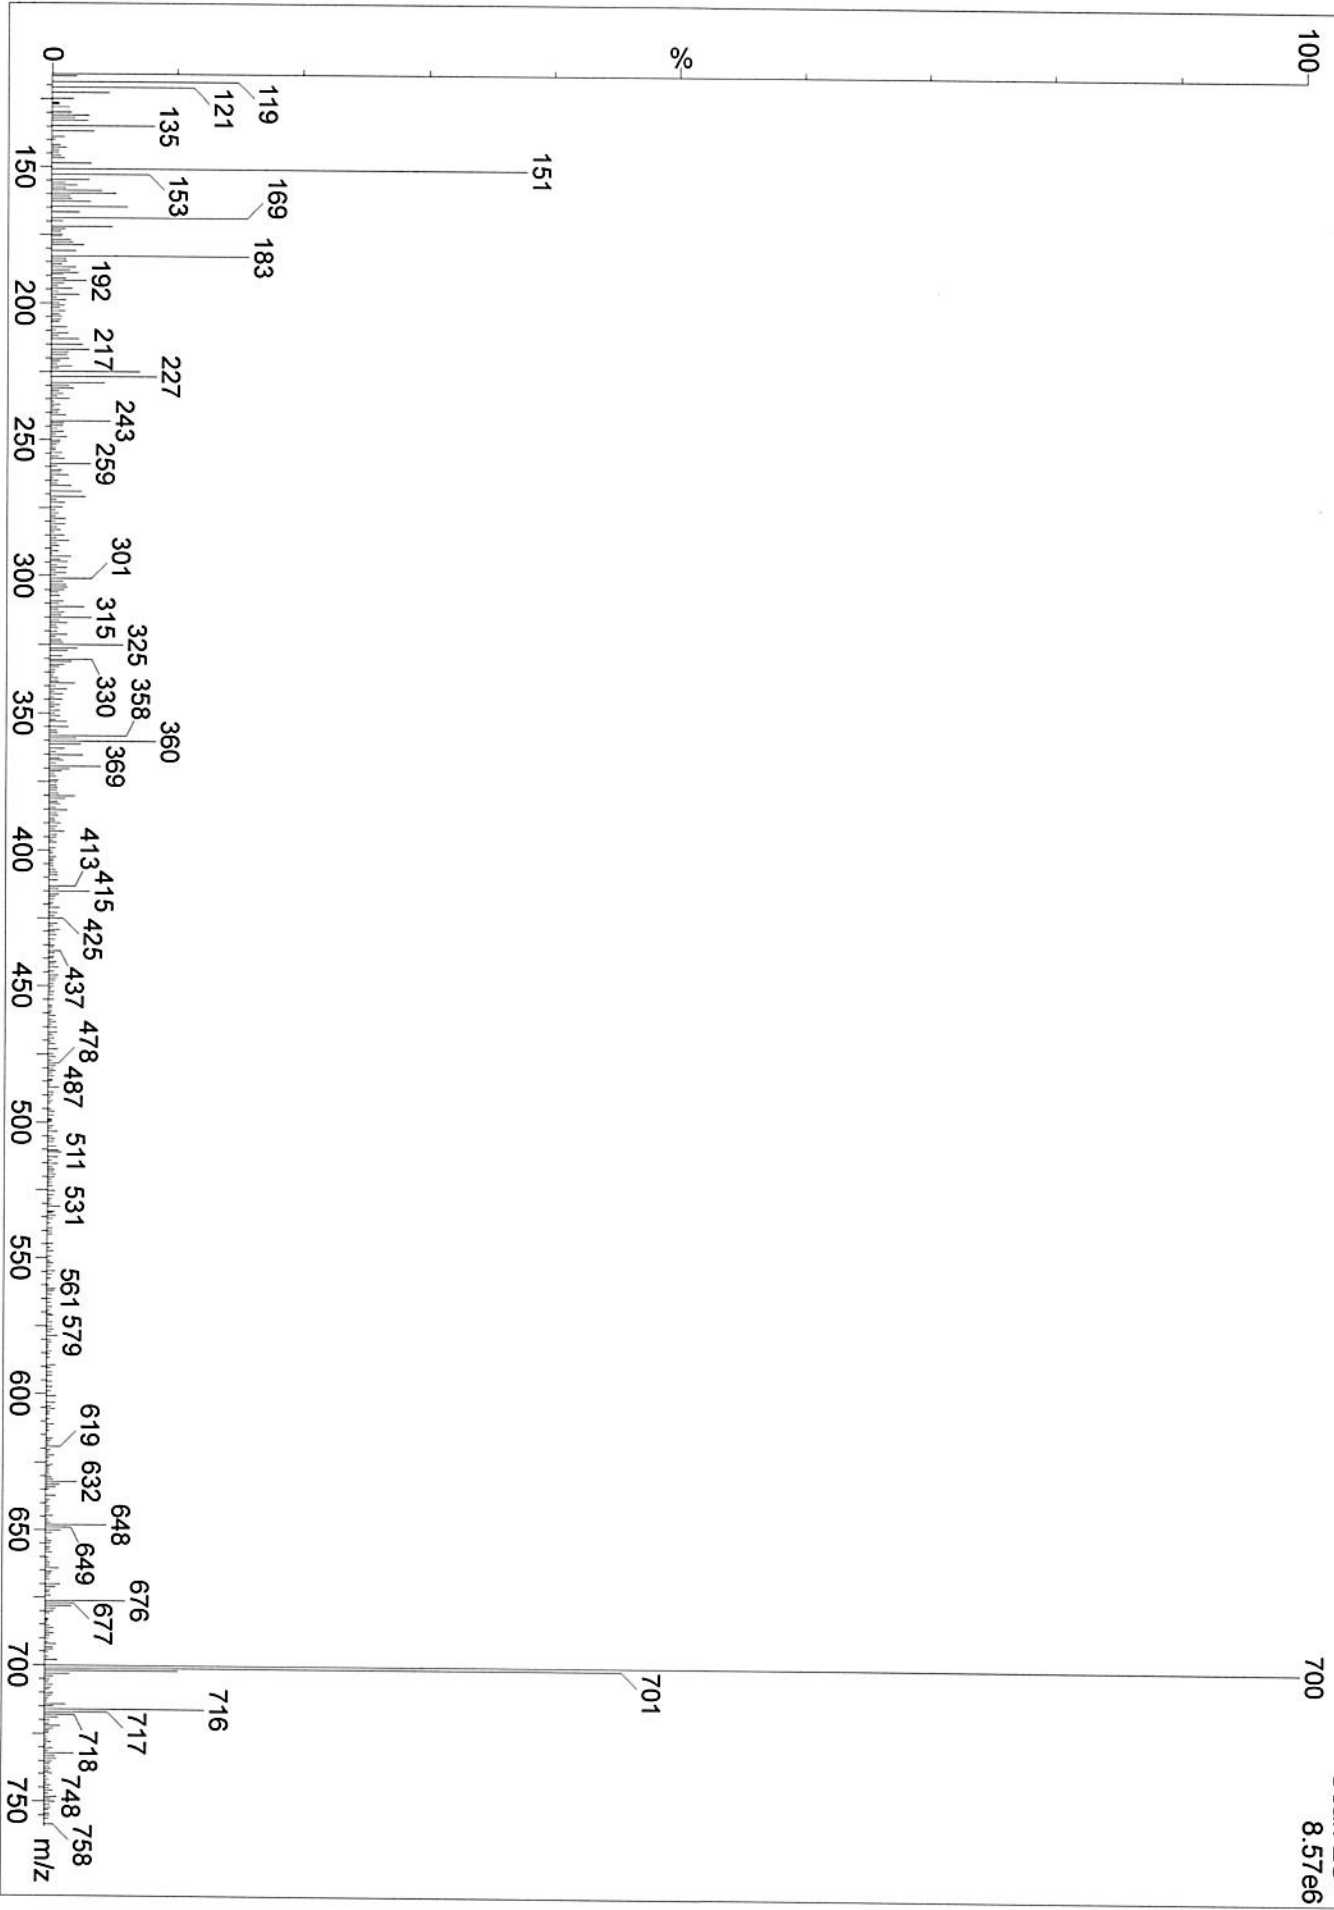

Scan ES+  
8.57e6



**Hybrid 018**

SPIN39 (0.102) Cu (0.20): Is (1.00, 1.00) C<sub>36</sub>H<sub>39</sub>N<sub>9</sub>O<sub>5</sub>Na<sub>1</sub>  
700.2972

Scan ES+  
6.46e12

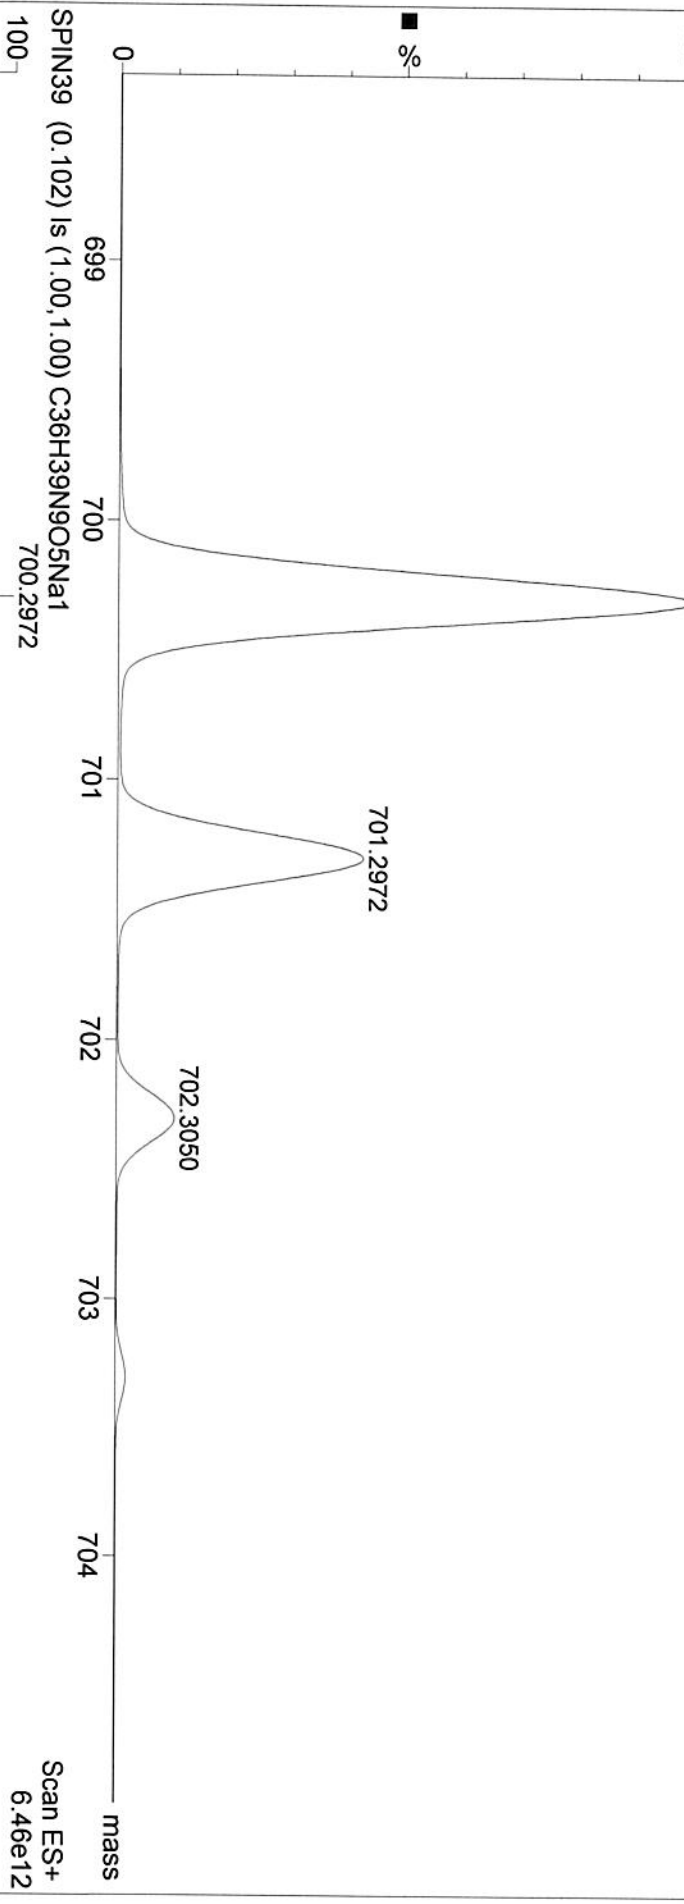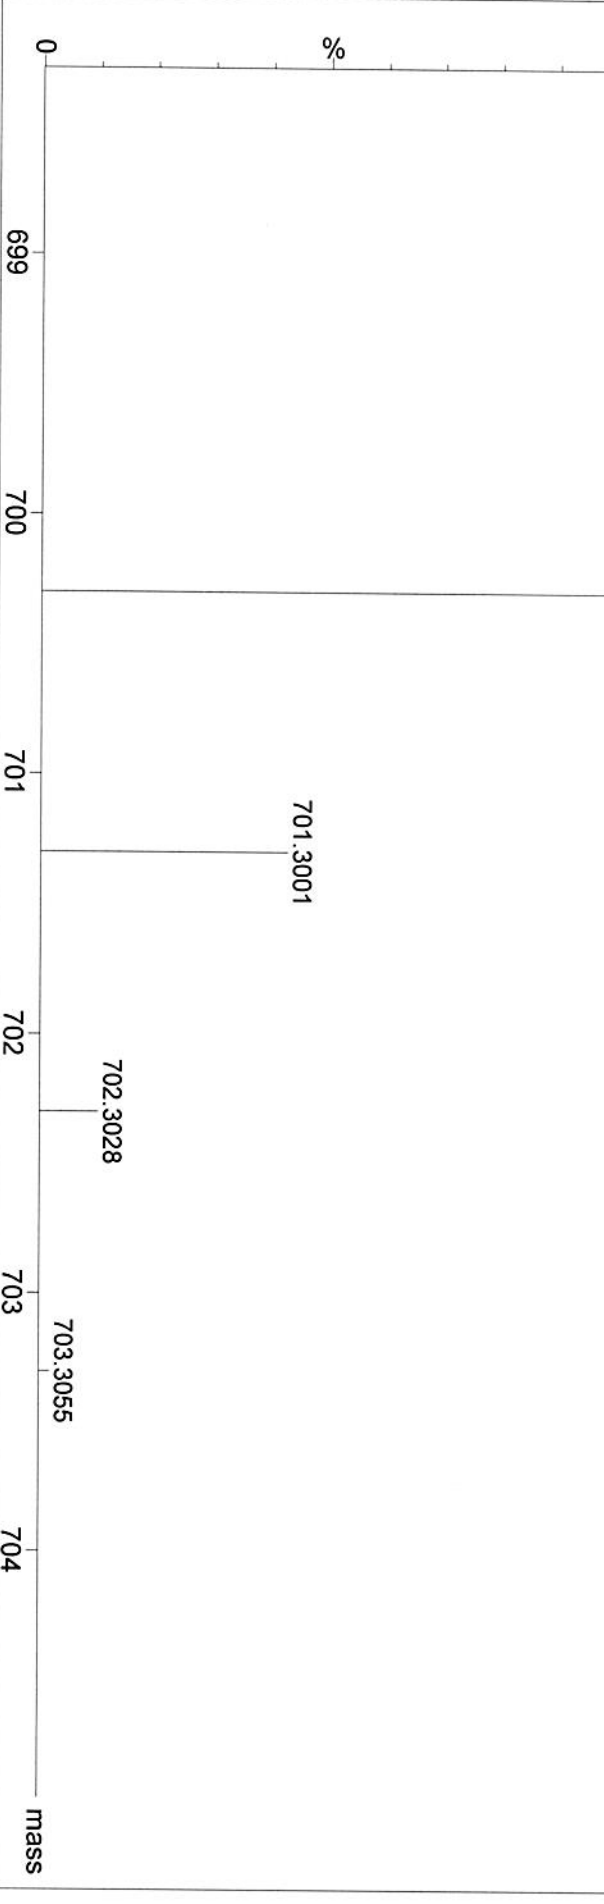

8a

Molecular Structure Research Centre, Yerevan, Armenia, Varian Mercury-300VX

H1 300.088 MHz,  $\tau = 16$ ,  $\eta = 32000$ ,  $\text{temp} = 30.0$  C,  $\text{lb} = -0.2$ , solvent = DMSO/C14 1/3

SAMV\_19 he-472

Jun 28 2019

+ *[Signature]*

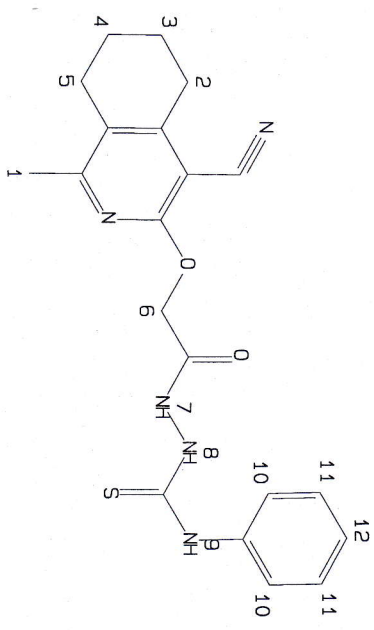

C<sub>20</sub>H<sub>21</sub>N<sub>5</sub>O<sub>2</sub>S

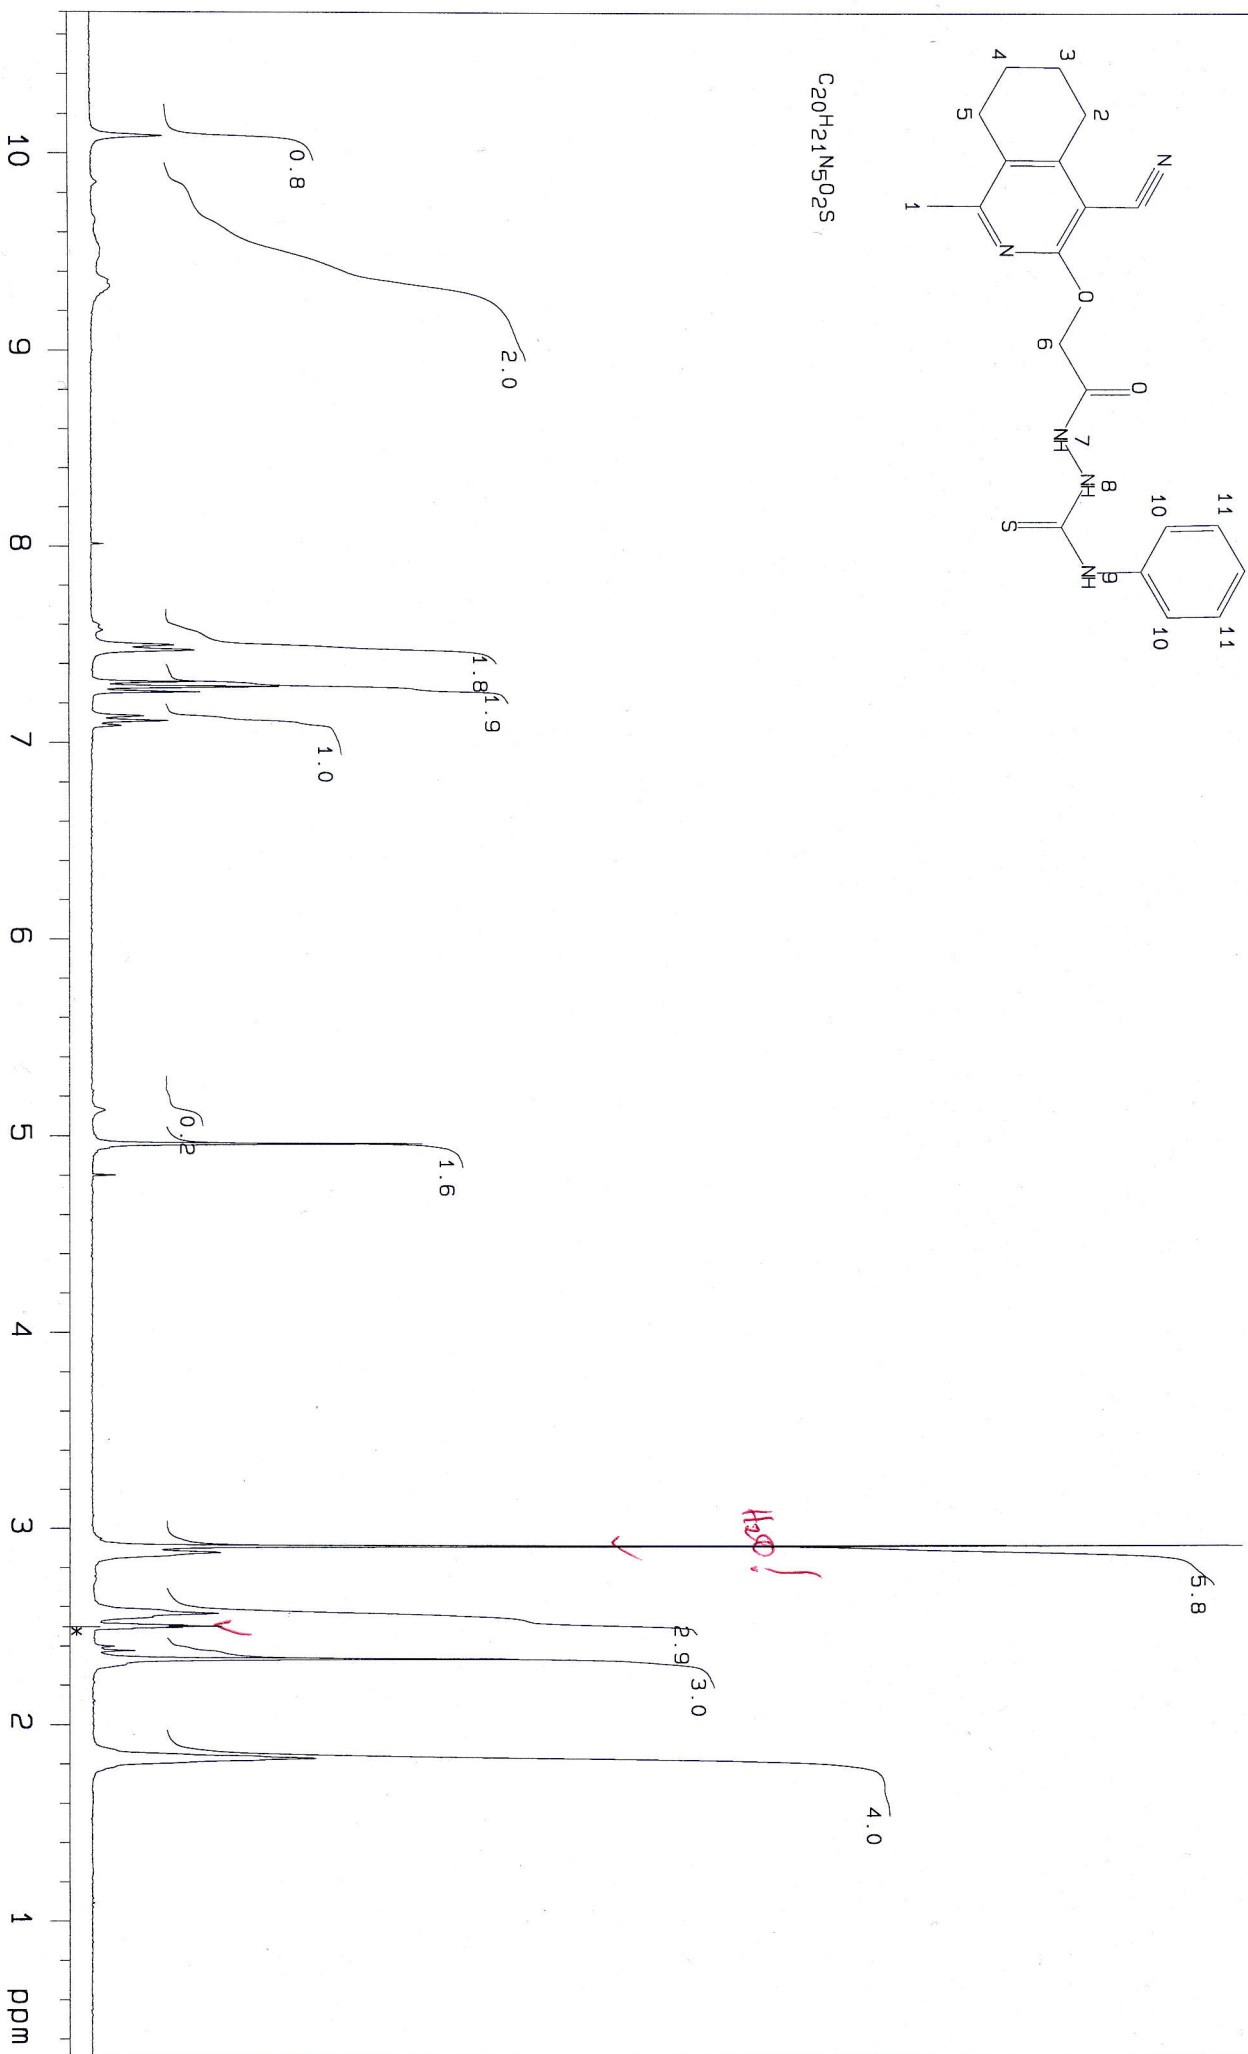

8a

HE-472  
Molecular Structure Research Centre, Yerevan, Armenia, Varian Mercury-300VX

C13 75.465 MHz, nt = 576, np = 19998, temp = 30.0 C, lb = 1.0, solvent = DMSO/CCL4 1/3

SAMV\_19 he-472

Jun 28 2019

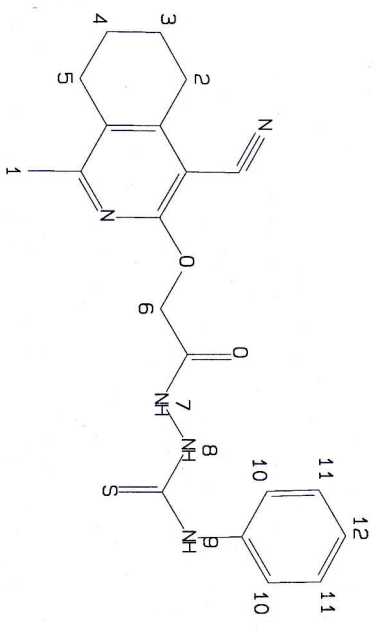

C<sub>20</sub>H<sub>21</sub>N<sub>5</sub>O<sub>2</sub>S

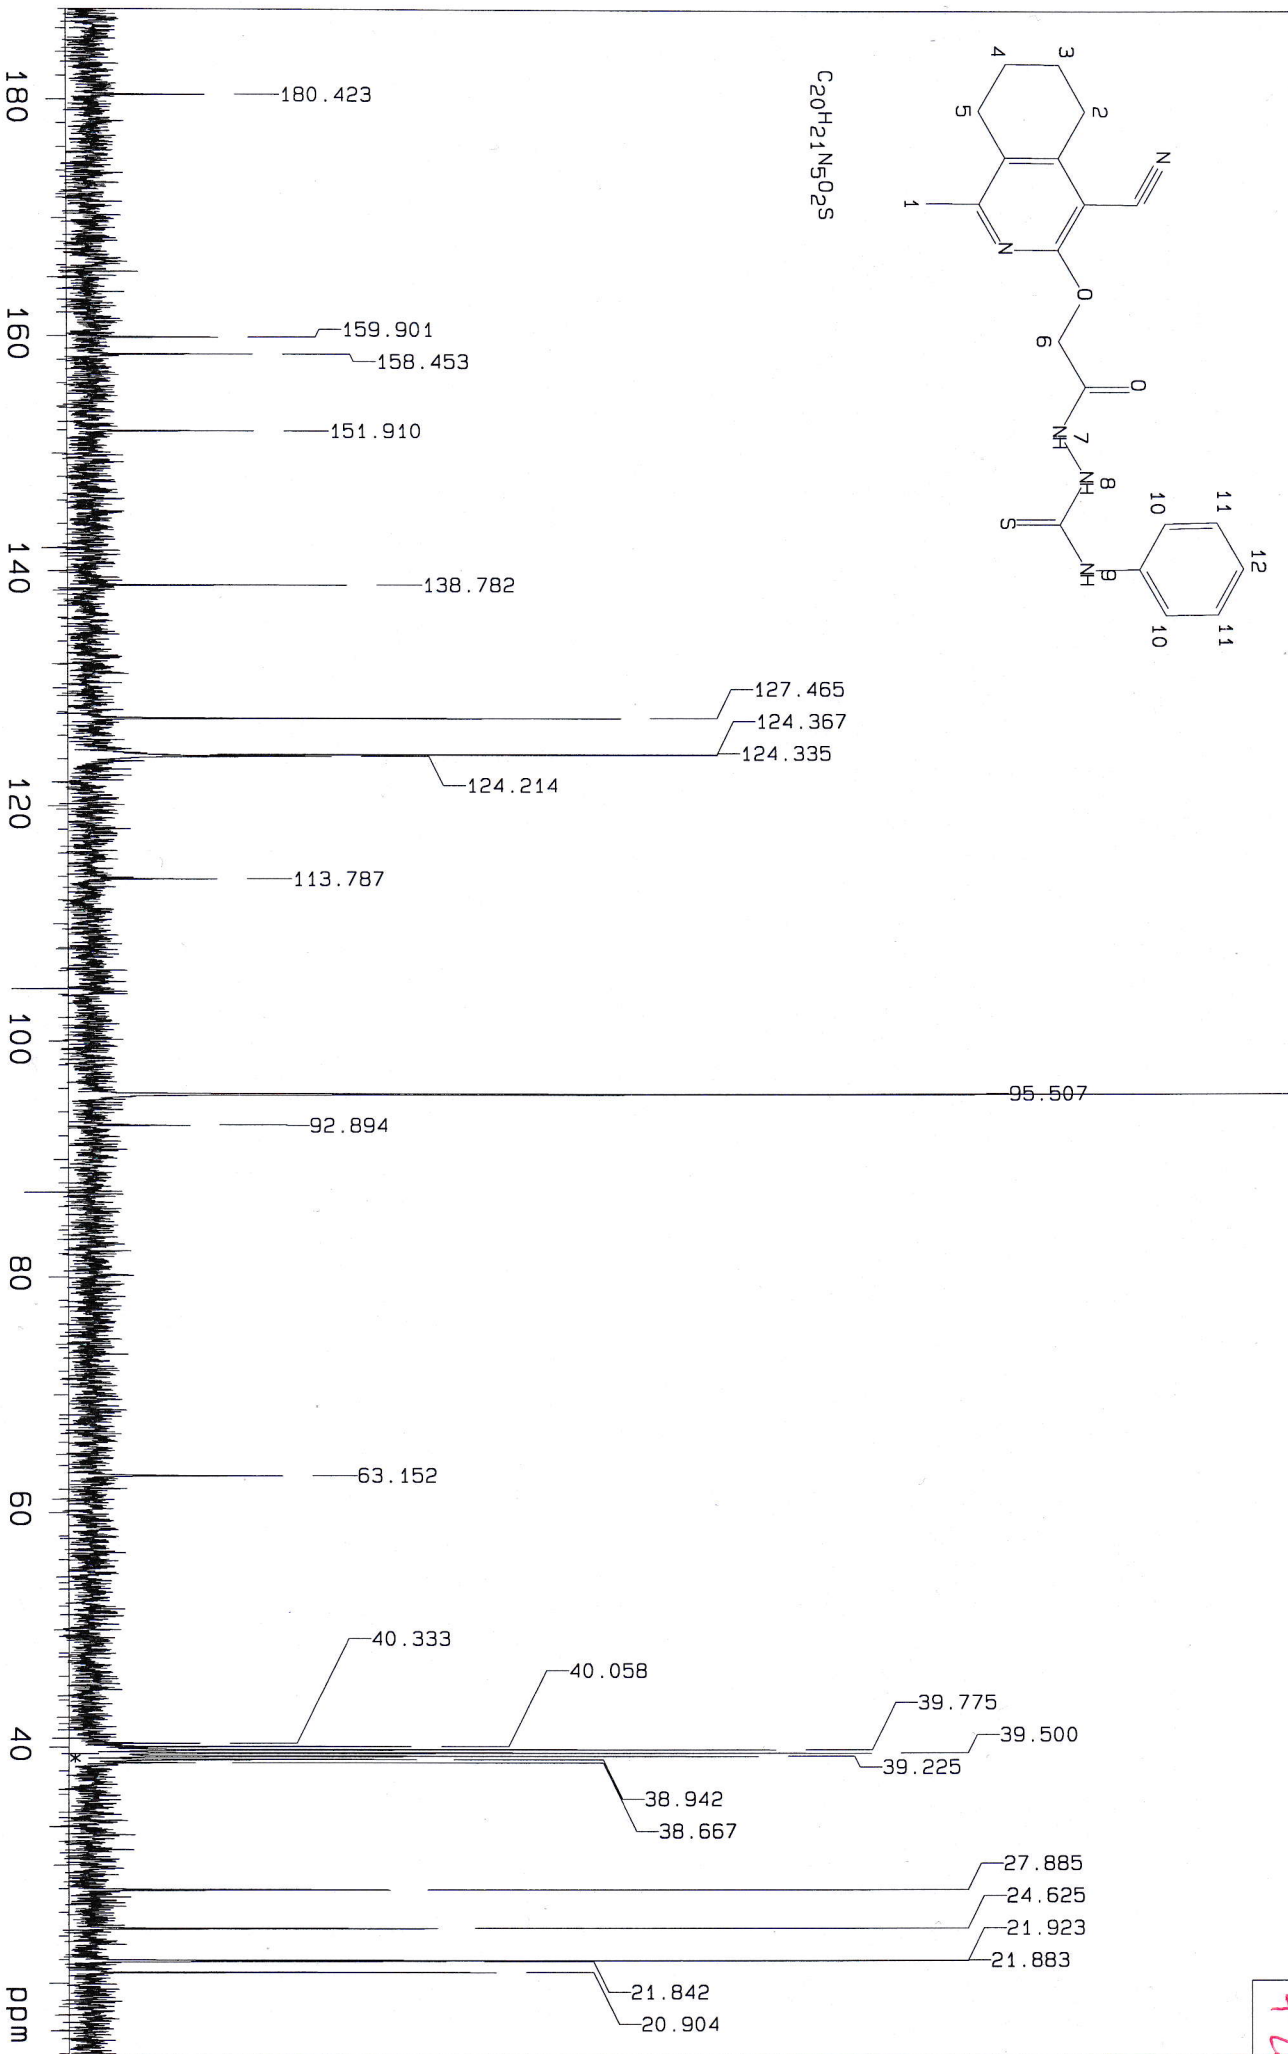

+

88

Molecular Structure Research Centre, Yerevan, Armenia, Varian Mercury-300VX

H1 300.088 MHz, nt = 16, np = 16000, temp = 30.0 C, lb = -0.2, solvent = DMSO/CD4 1/3

SAMV\_19 he-461

May 29 2019

HE-461

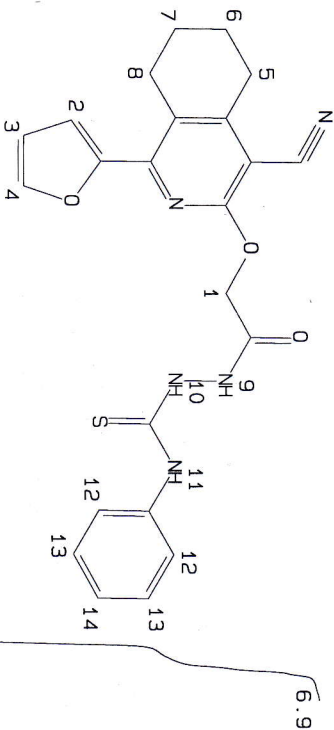

C<sub>23</sub>H<sub>21</sub>N<sub>5</sub>O<sub>3</sub>S

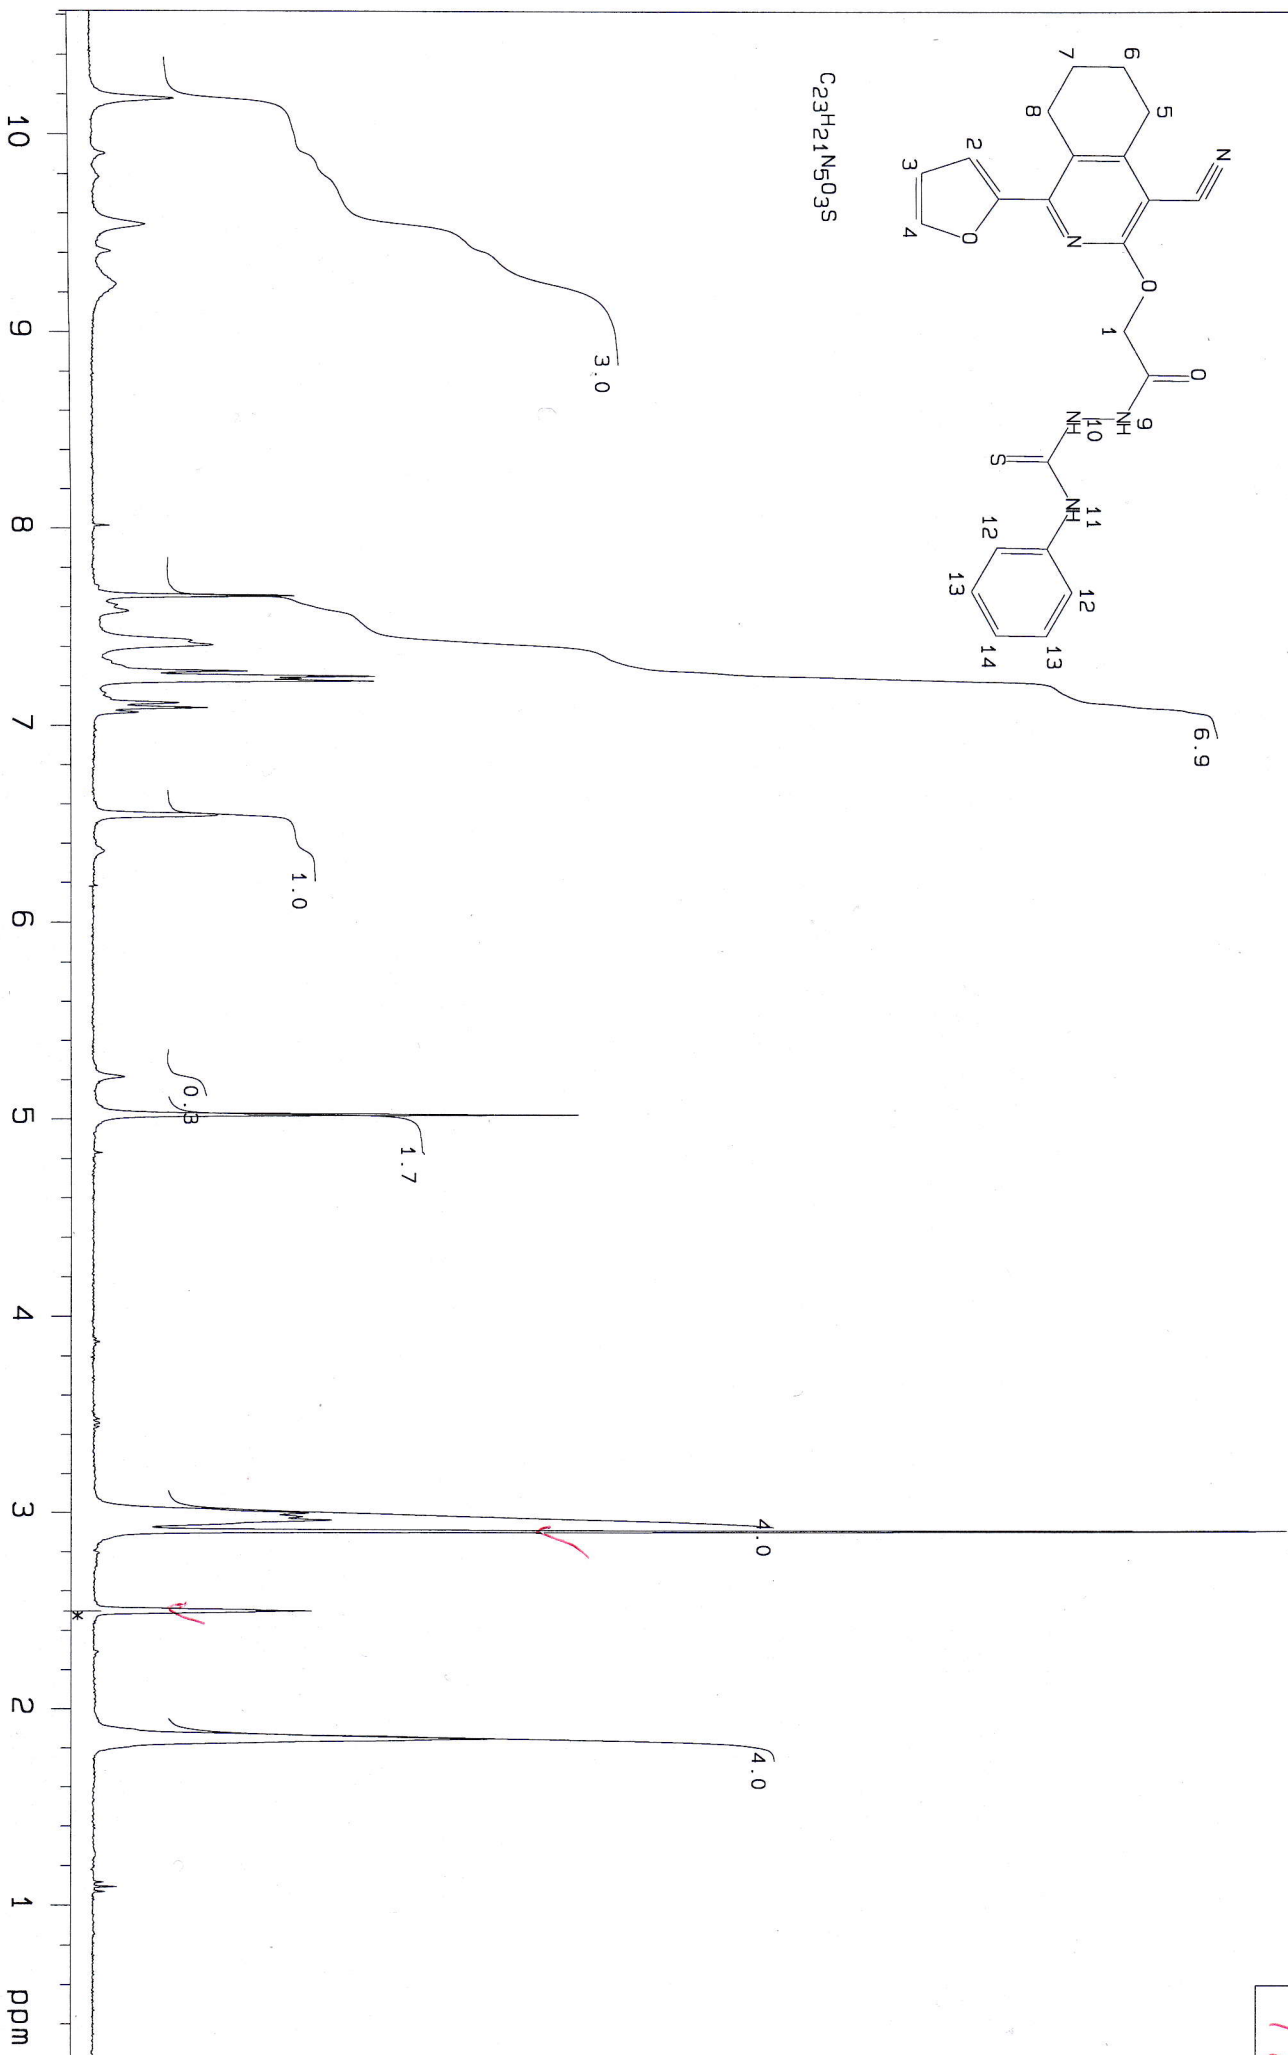

Handwritten signatures and initials in red ink.

8c

Molecular Structure Research Centre, Yerevan, Armenia, Varian Mercury-300VX  
T20-048-1

H1 300.088 MHz, nt = 16, np = 32000, temp = 30.0 C, lb = -0.2, solvent = DMSO/CDCl4 1/3  
ANUSH\_TEMA t20-048-1

Mar 17 2021

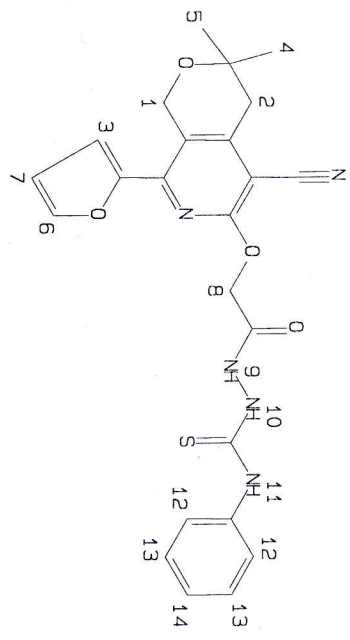

C<sub>24</sub>H<sub>23</sub>N<sub>5</sub>O<sub>4</sub>S

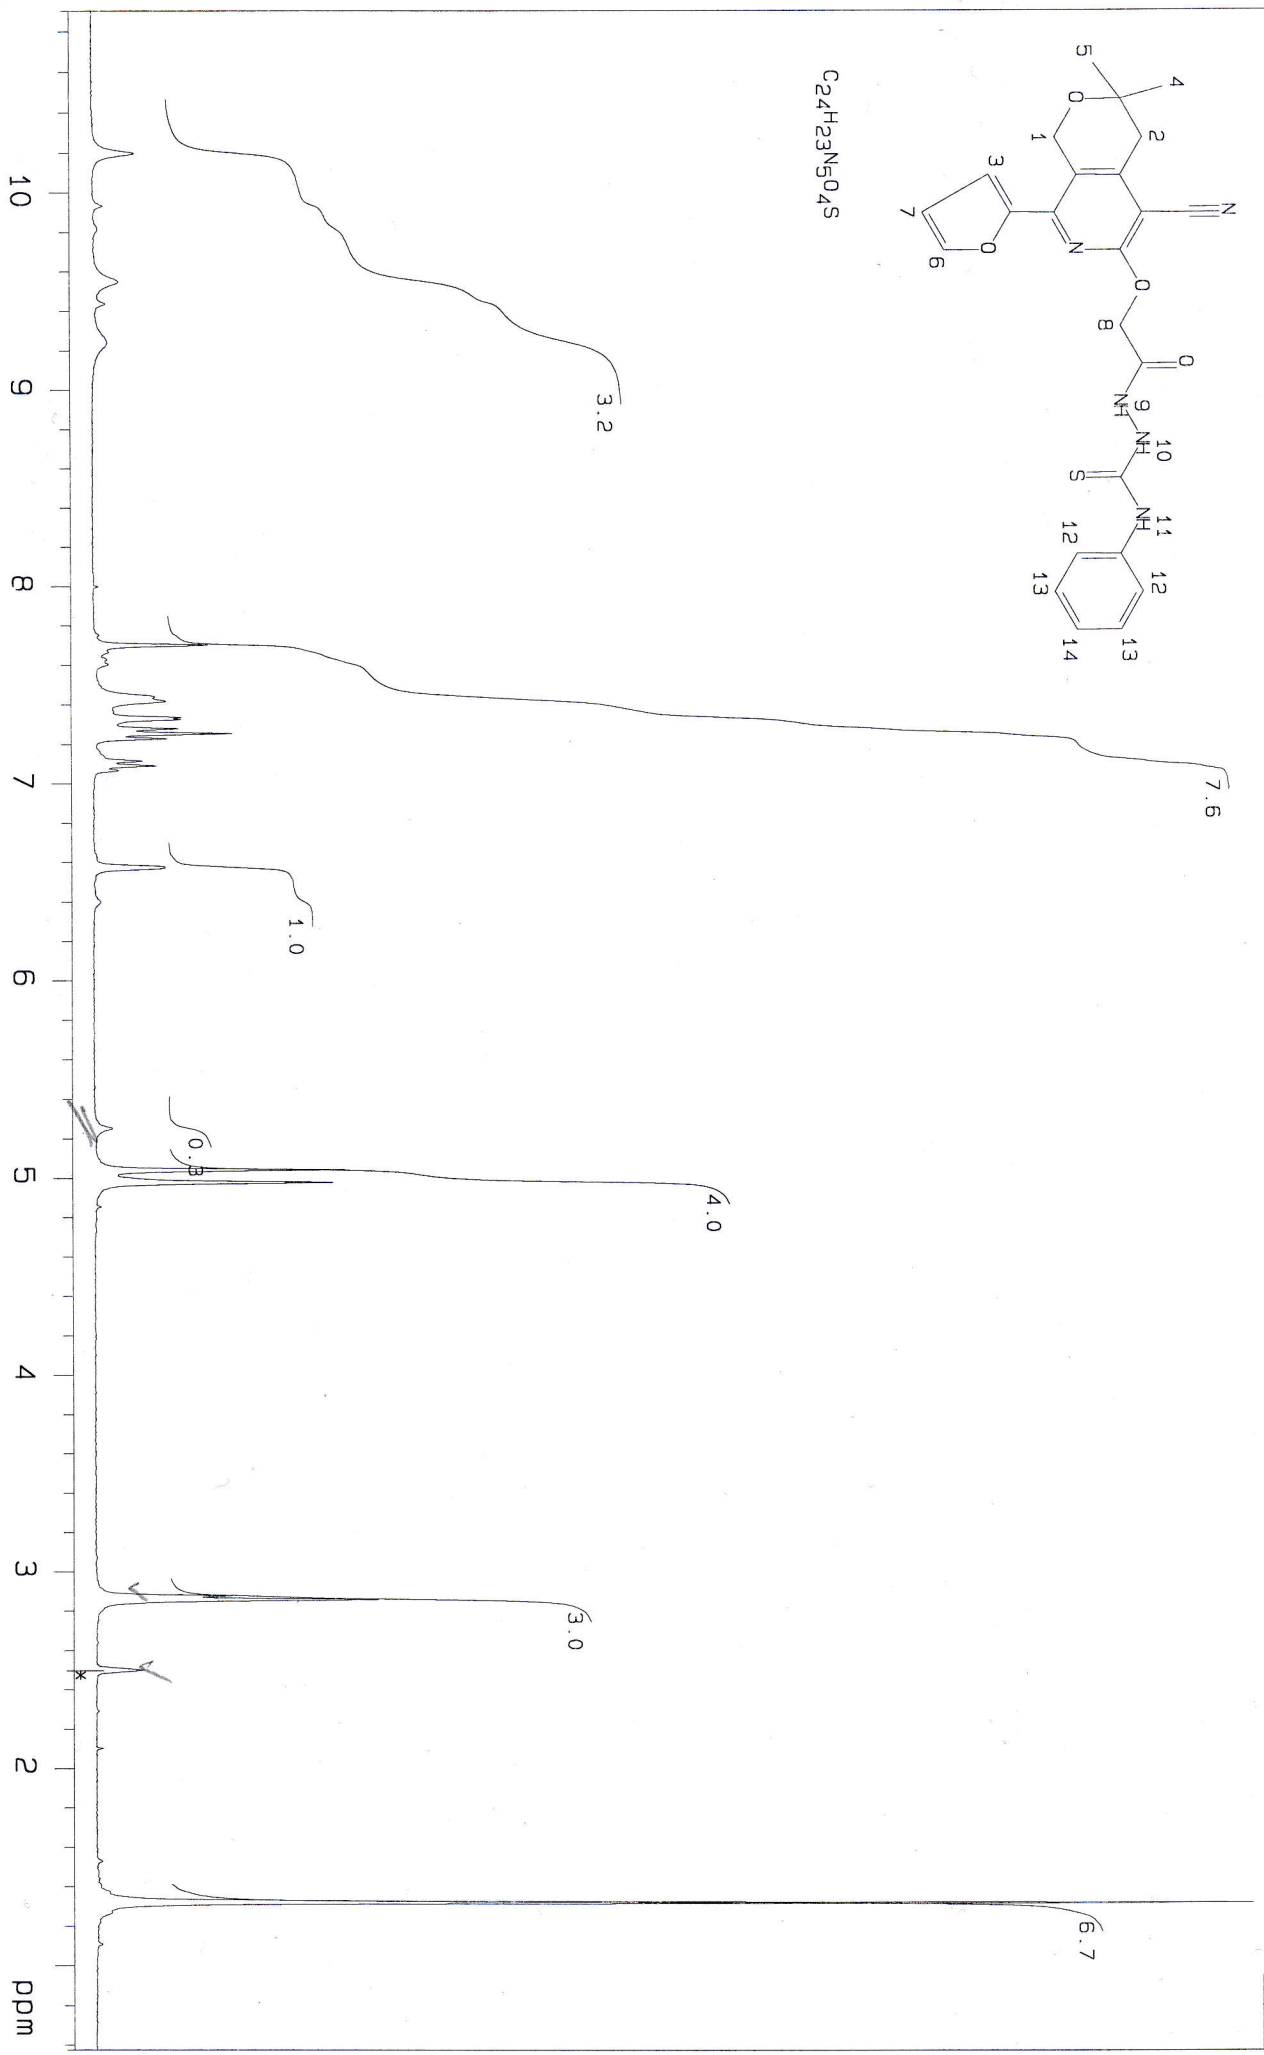

+ *[Signature]*

9e

Molecular Structure Research Centre, Yerevan, Armenia, Varian Mercury-300VX

H1 300.088 MHz, nt = 16, np = 32000, temp = 30.0 C, lb = 0.2, solvent = DMSO/Cl4 1/3

NOCI\_24 he-473

Jan 23 2024

HE-473

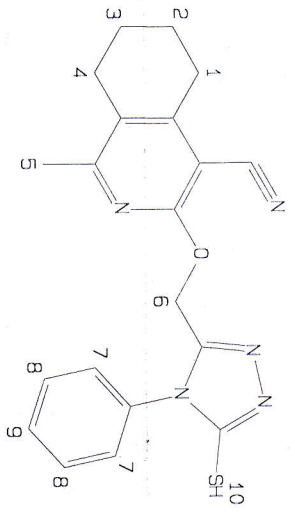

C<sub>20</sub>H<sub>14</sub>N<sub>5</sub>O<sub>2</sub>S

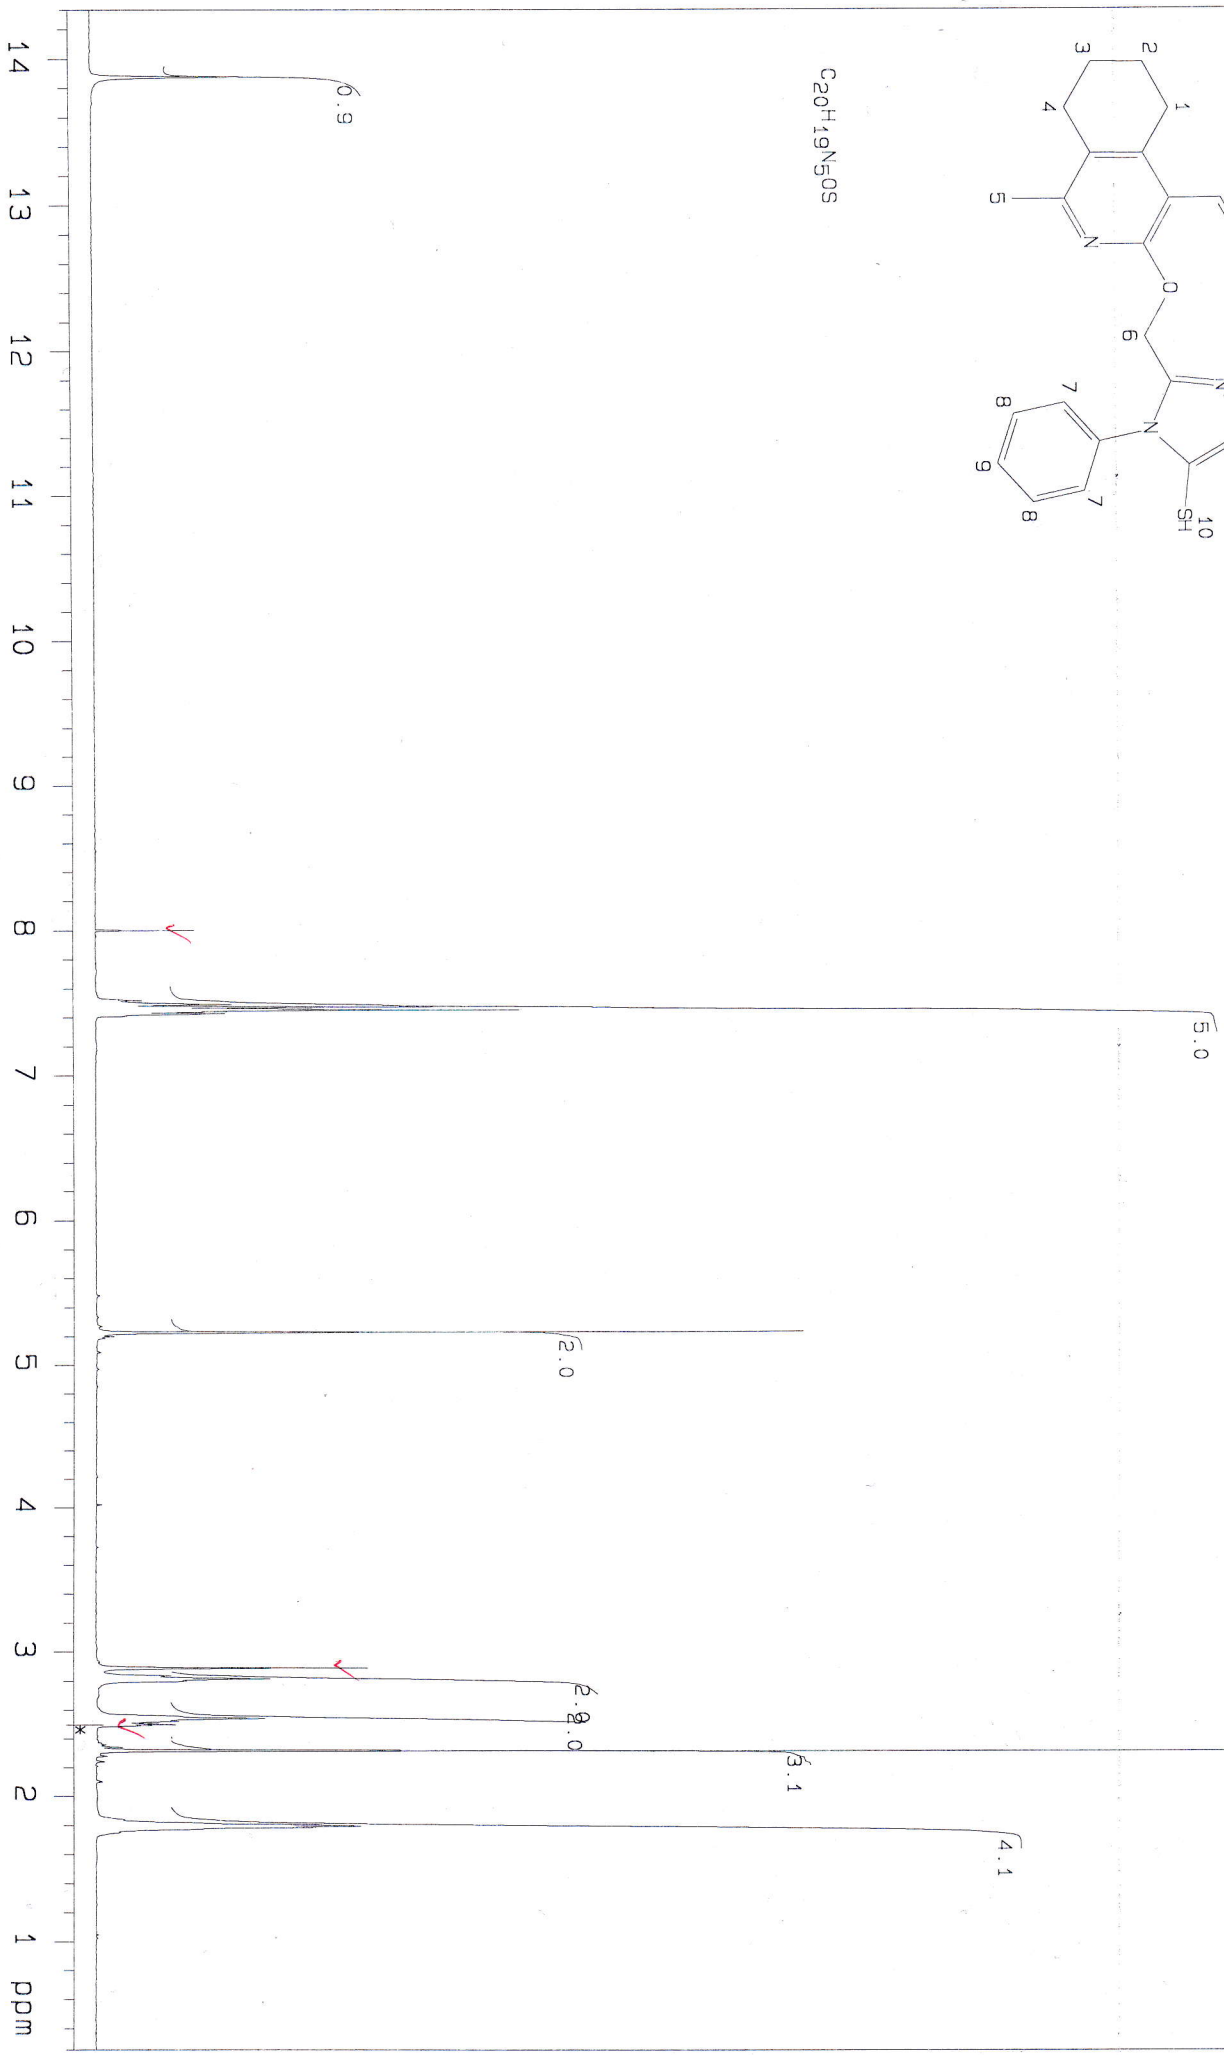

+  
*[Signature]*

9a

Molecular Structure Research Centre, Yerevan, Armenia, Varian Mercury-300VX

C13 75.465 MHz, nt = 528, np = 19998, temp = 30.0 C, lb = 1.0, solvent = DMSO(C14 1/3

NOCI\_24 he-473

Jan 23 2024

HE-473

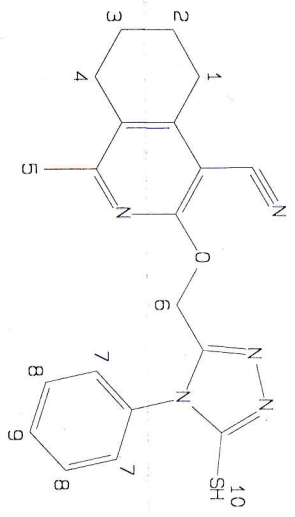

C<sub>20</sub>H<sub>19</sub>N<sub>5</sub>O<sub>5</sub>

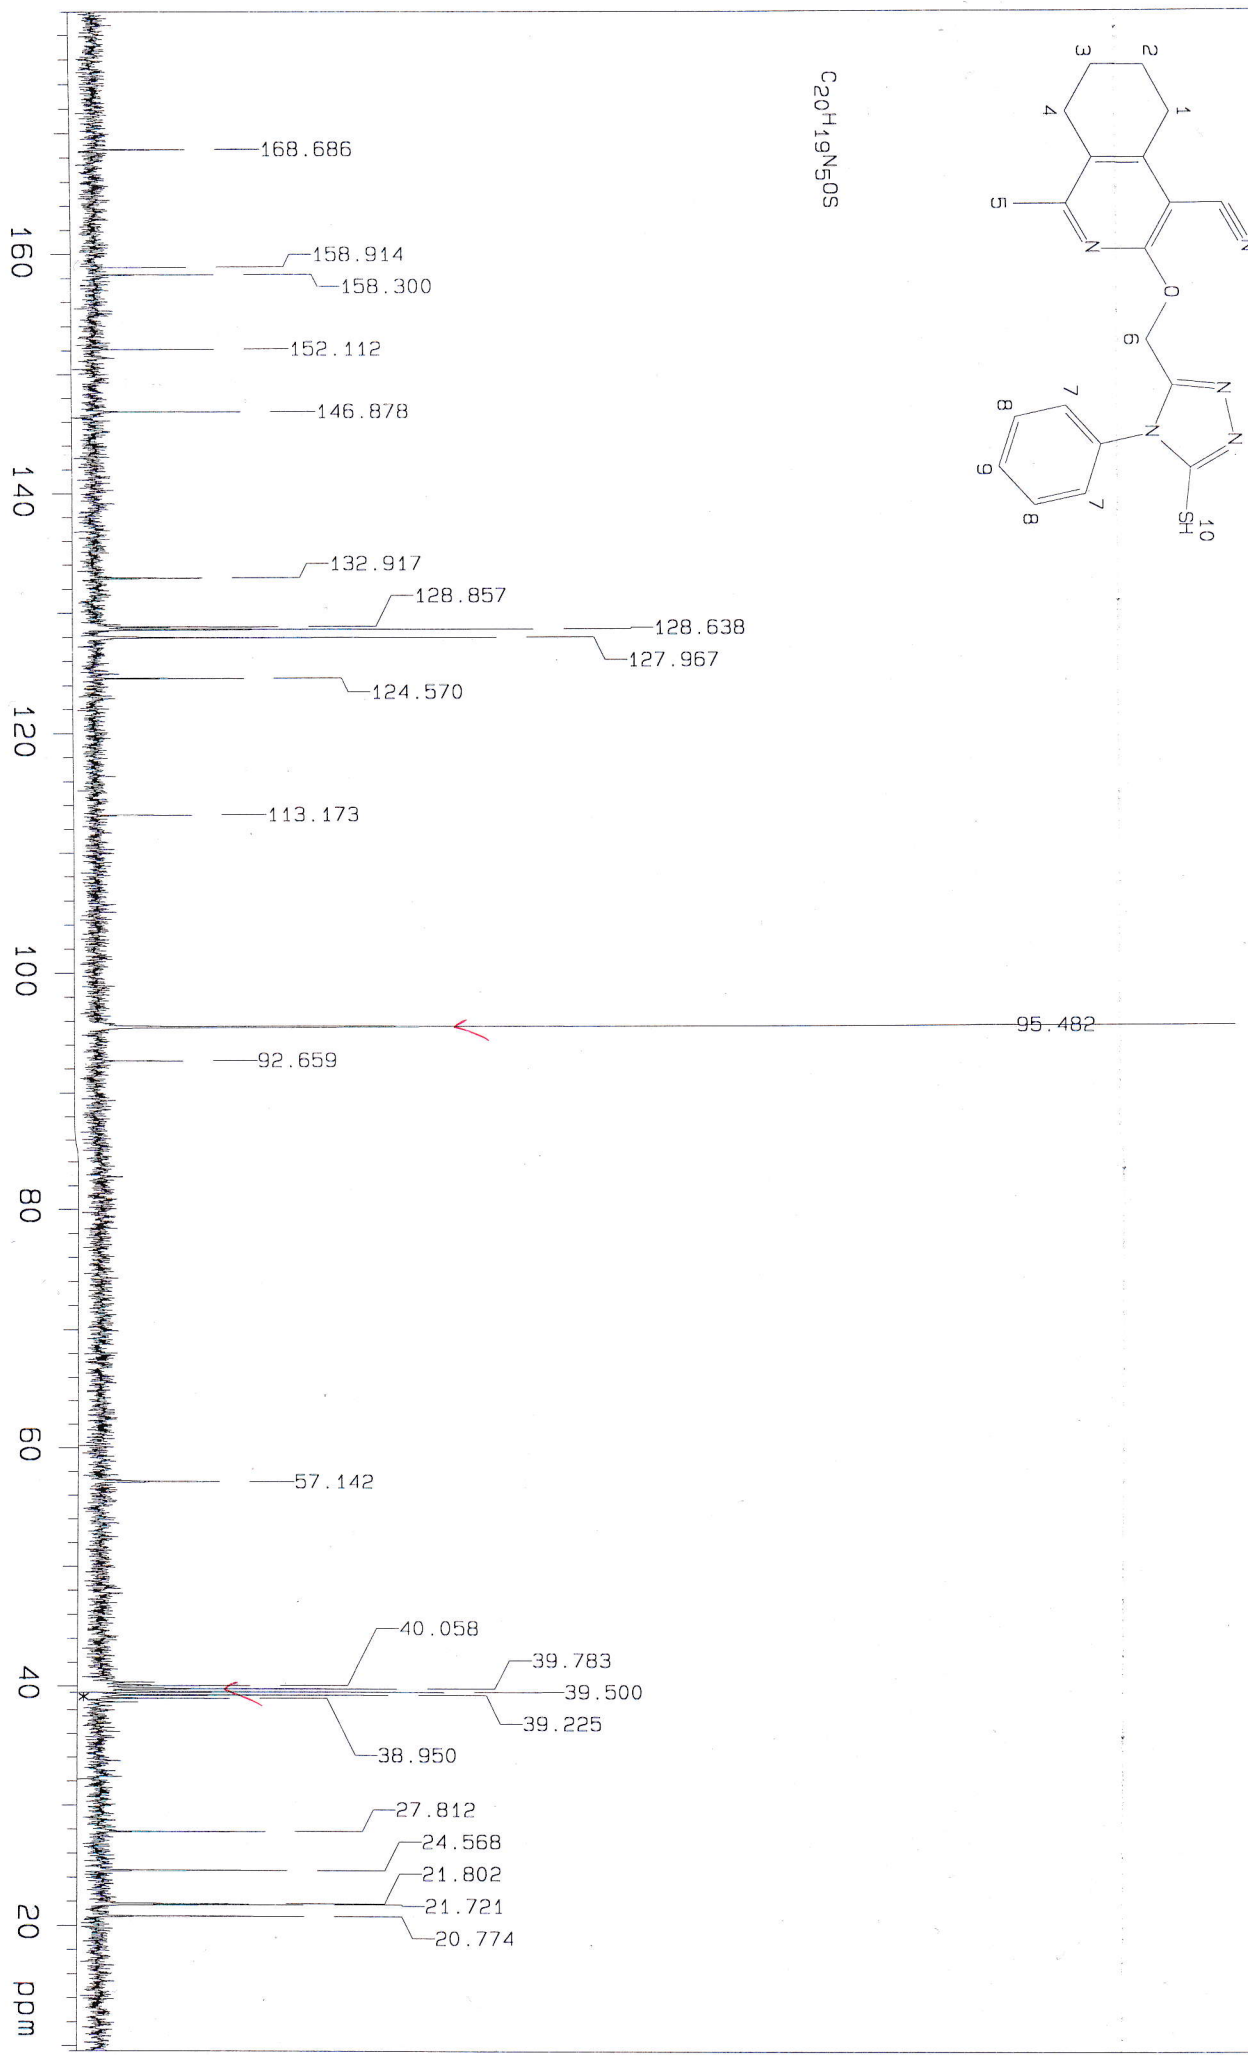

+ [Signature]



98

Molecular Structure Research Centre, Yerevan, Armenia, Varian Mercury-300VX

H1 300.088 MHz, nt = 16, np = 32000, temp = 30.0 C, lb = -0.2, solvent = DMSO/Cd4 1/3

SAMV\_19 he-466

May 31 2019

+

HE-466

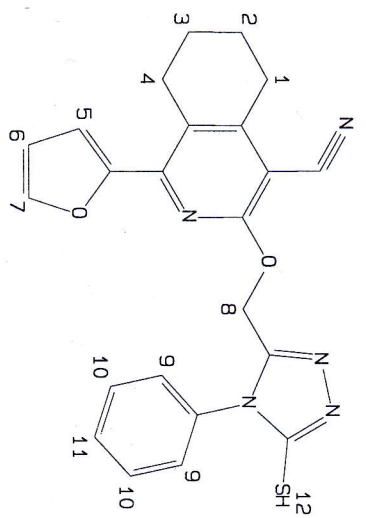

C<sub>23</sub>H<sub>19</sub>N<sub>5</sub>O<sub>2</sub>S

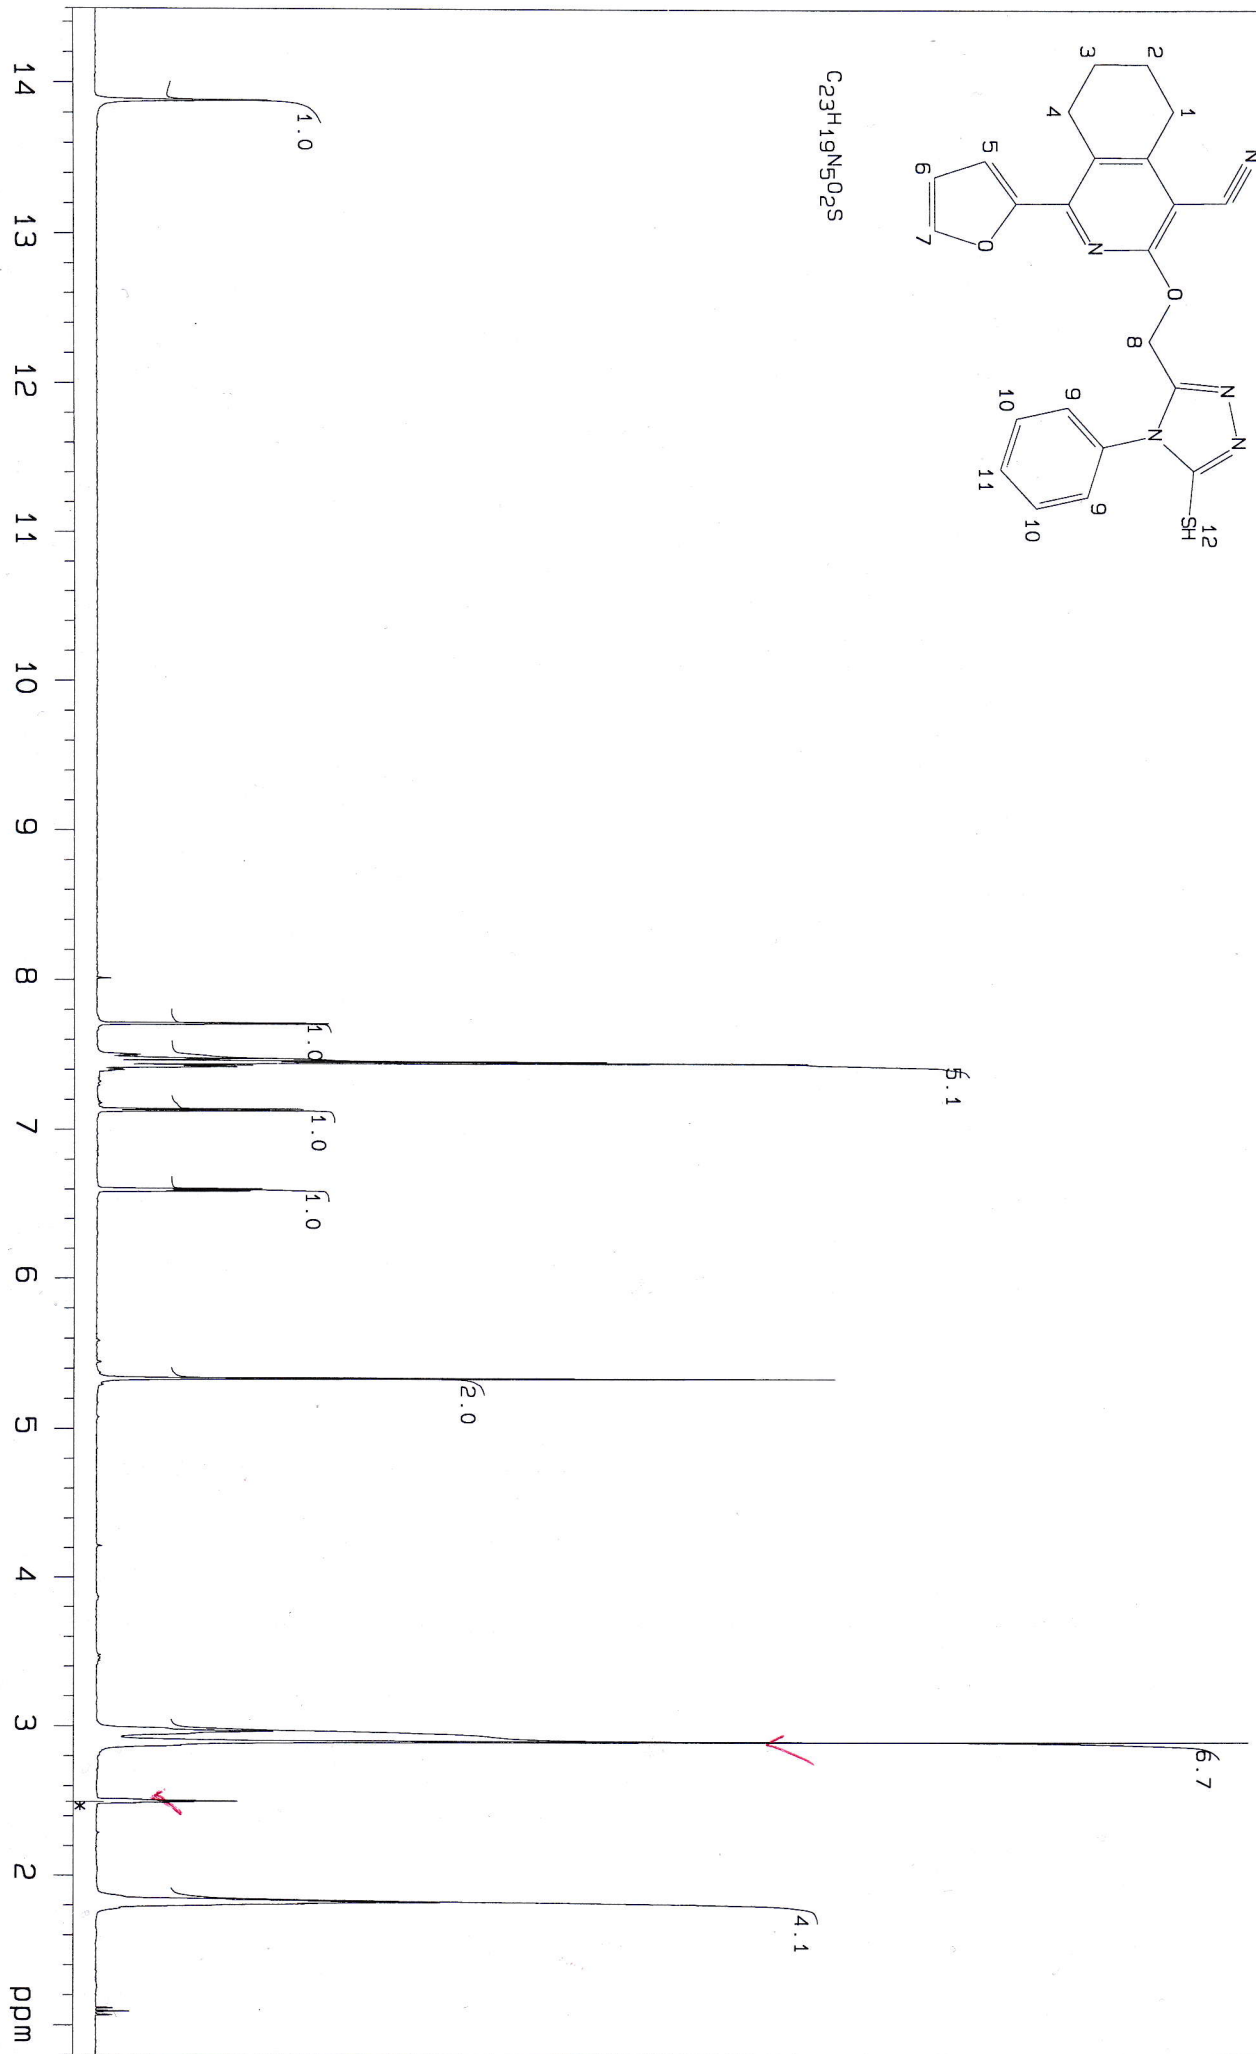

*Handwritten signature*

96

Molecular Structure Research Centre, Yerevan, Armenia, Varian Mercury-300VX  
**HE-466**

C13 75.465 MHz, nt=544, np=19998, temp=30.0 C, lb=1.0, solvent=DMSO/C4 1/3

SAMV\_19 he-466

May 31 2019

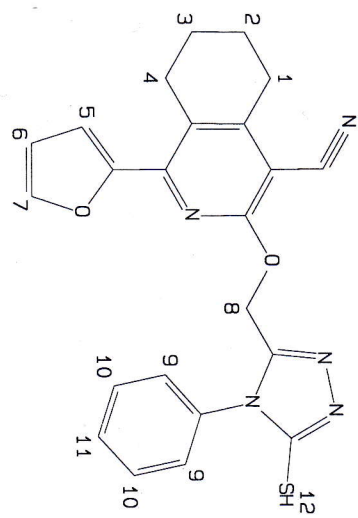

C<sub>23</sub>H<sub>19</sub>N<sub>5</sub>O<sub>2</sub>S

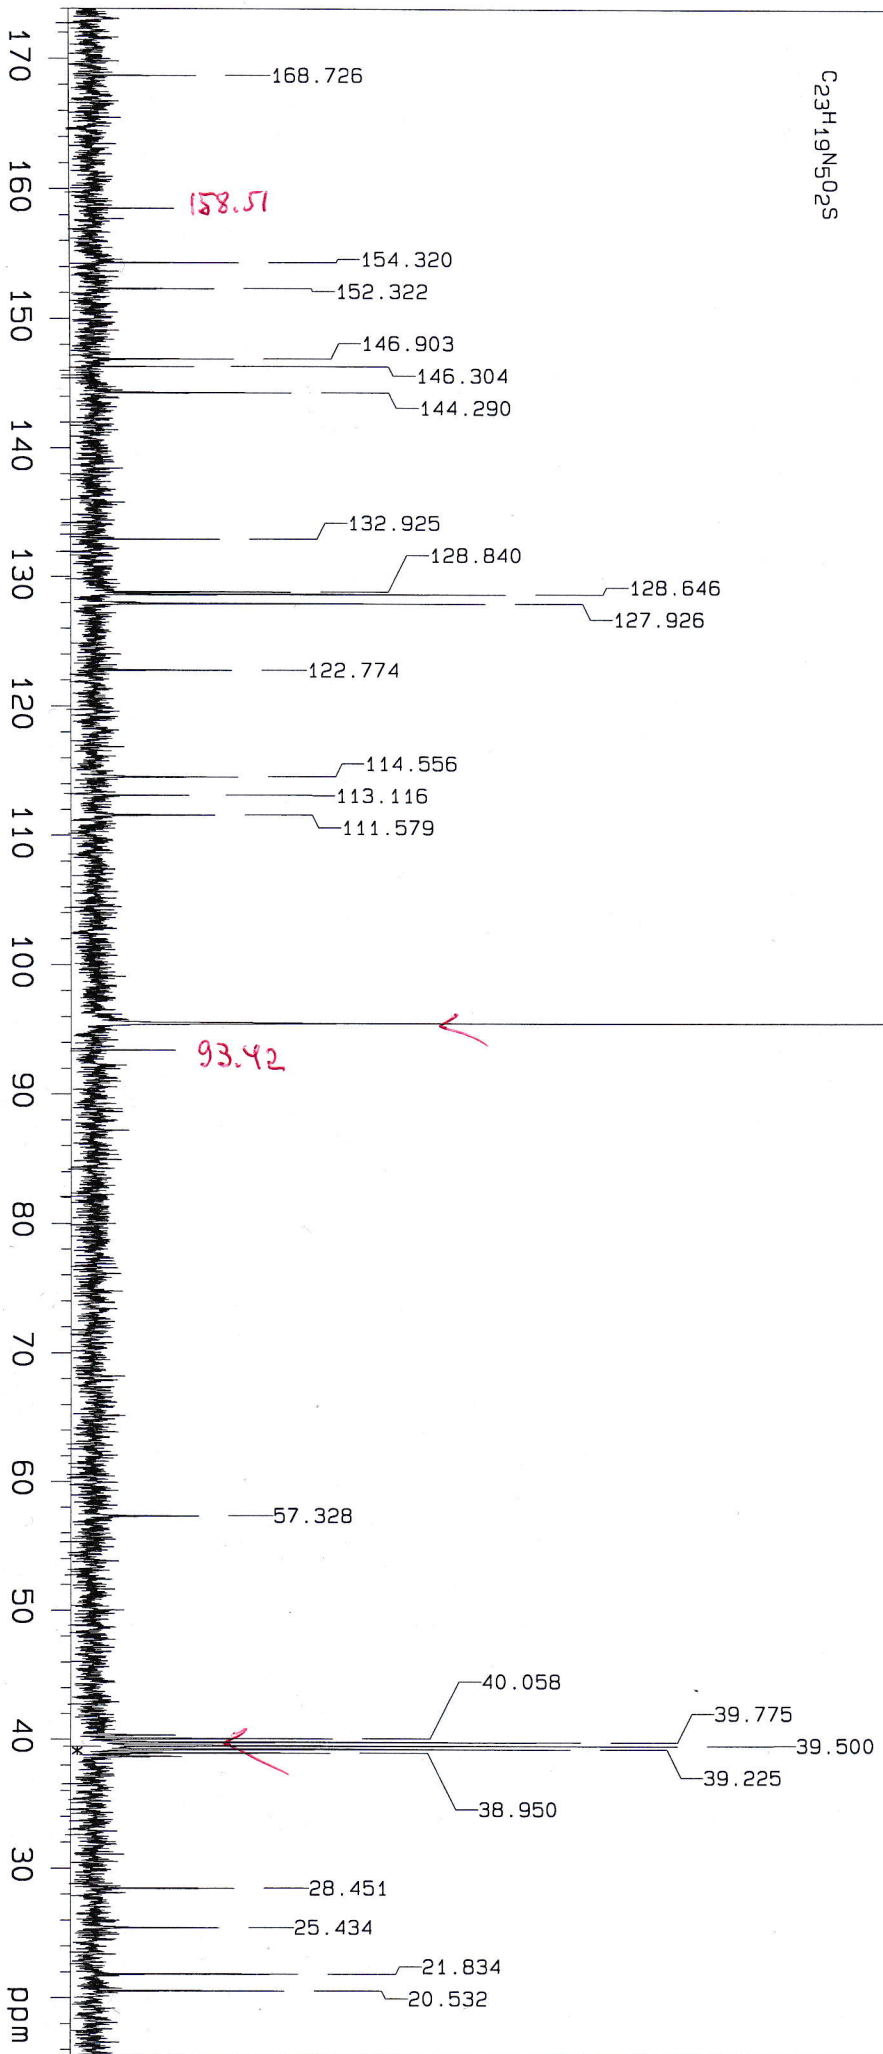

f

*Handwritten signature*

9c

Molecular Structure Research Centre, Yerevan, Armenia, Varian Mercury-300VX  
T20-049-1

H1 300.088 MHz, nt = 16, mp = 32000, temp = 30.0 C, lb = -0.2, solvent = DMSO/CdA 1/3  
ANUSH\_TEMMA t20-049-1

Mar 25 2021

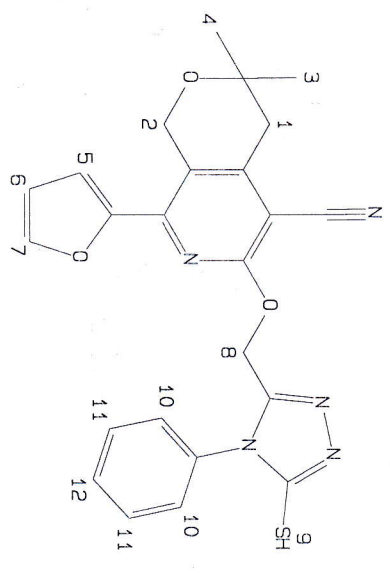

C<sub>24</sub>H<sub>21</sub>N<sub>5</sub>O<sub>3</sub>S

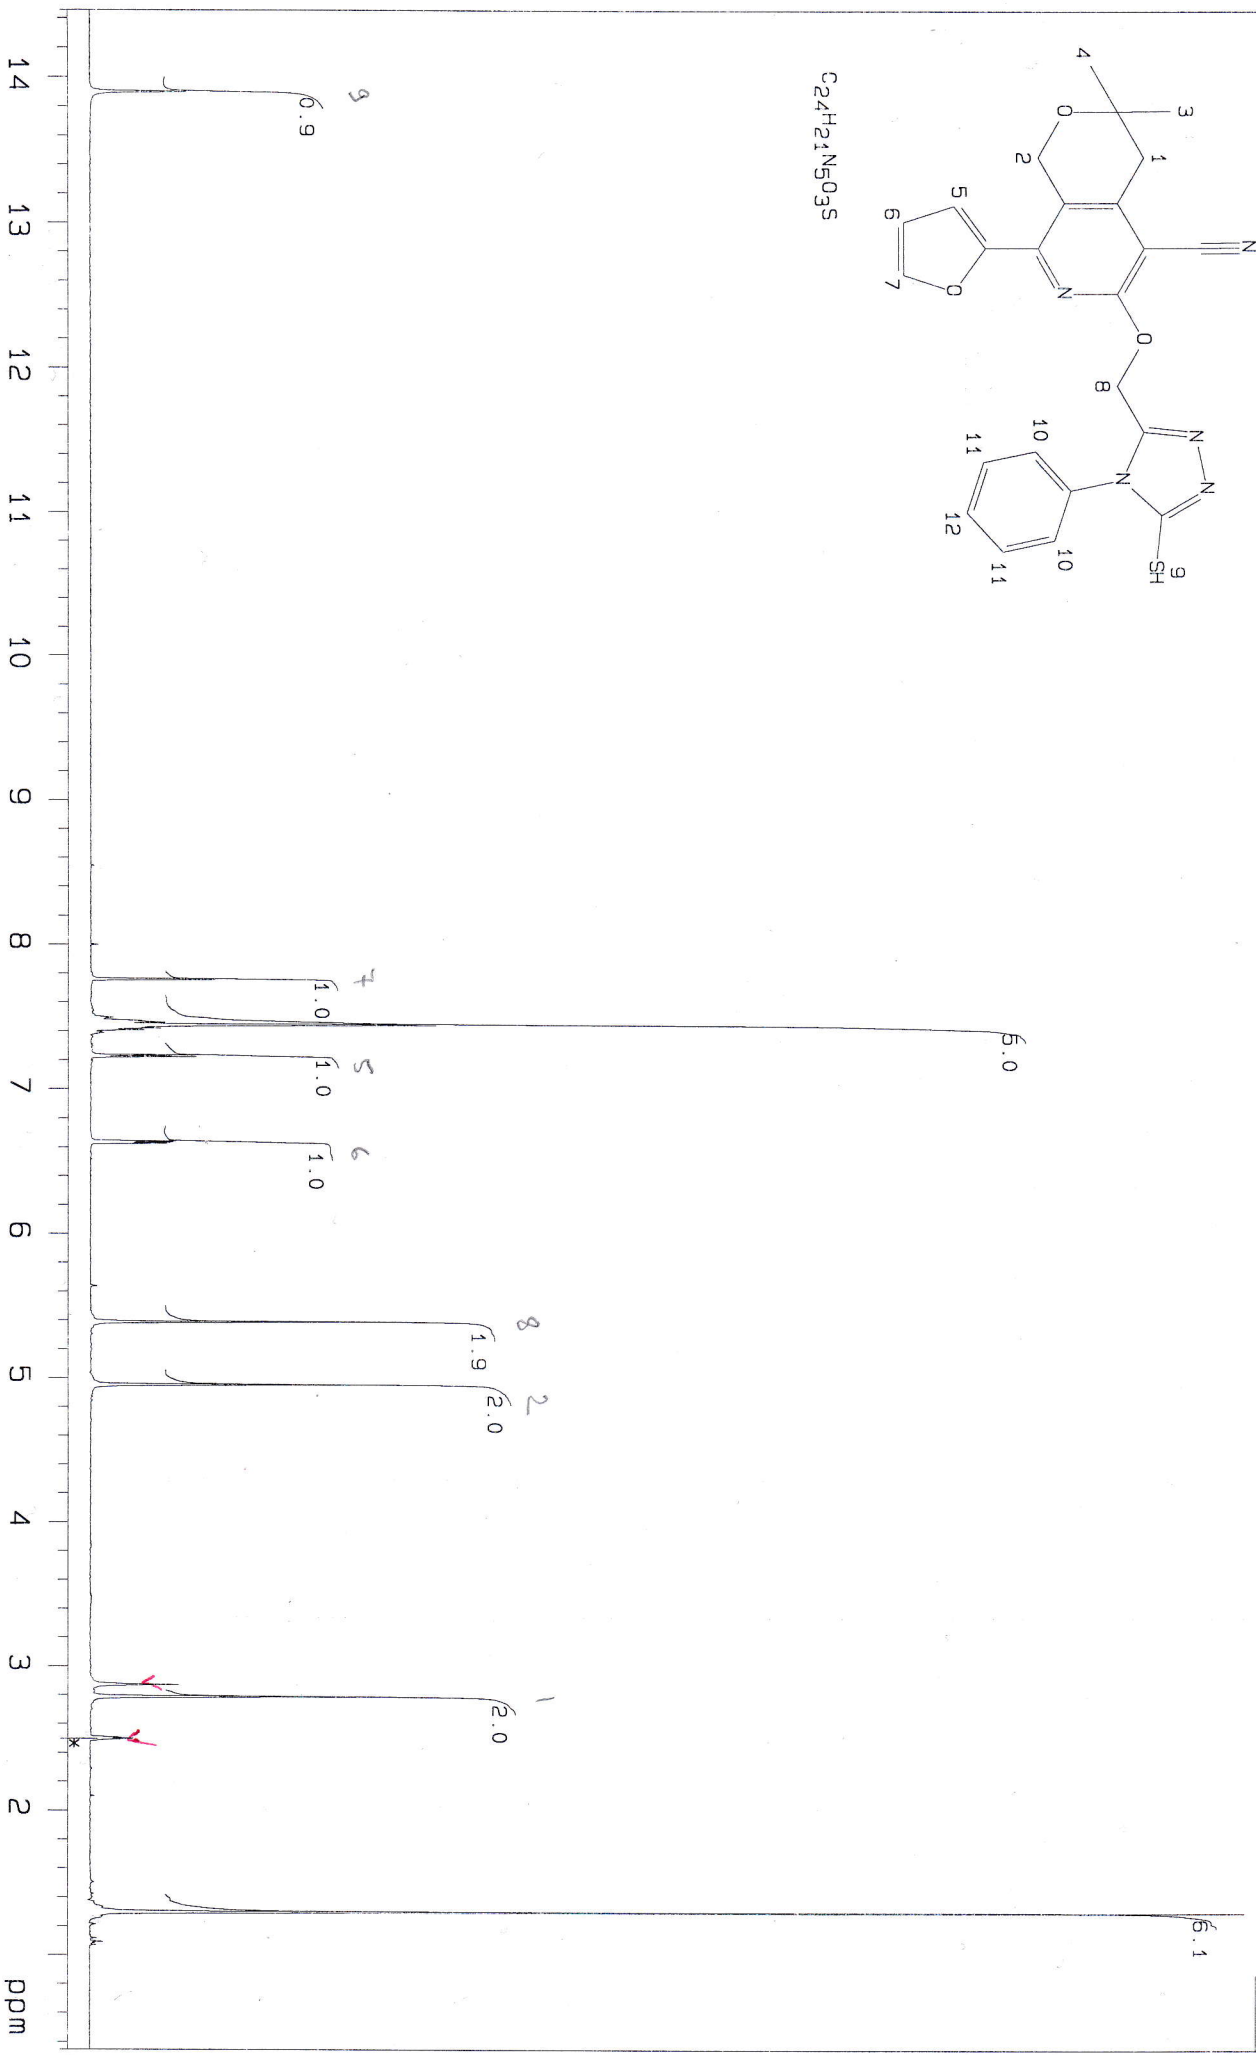

+

*Armen*

9c

Molecular Structure Research Centre, Yerevan, Armenia, Varian Mercury-300VX  
T20-049-1

C13 75.465 MHz, nt = 57.6, np = 19998, temp = 30.0 C, lb = 1.0, solvent = DMSO-C14 1/3  
ANUSH\_TEMA t20-049-1

Mar 25 2021

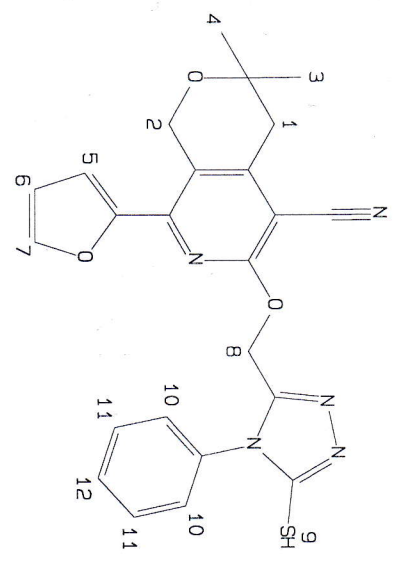

C<sub>24</sub>H<sub>21</sub>N<sub>5</sub>O<sub>3</sub>S

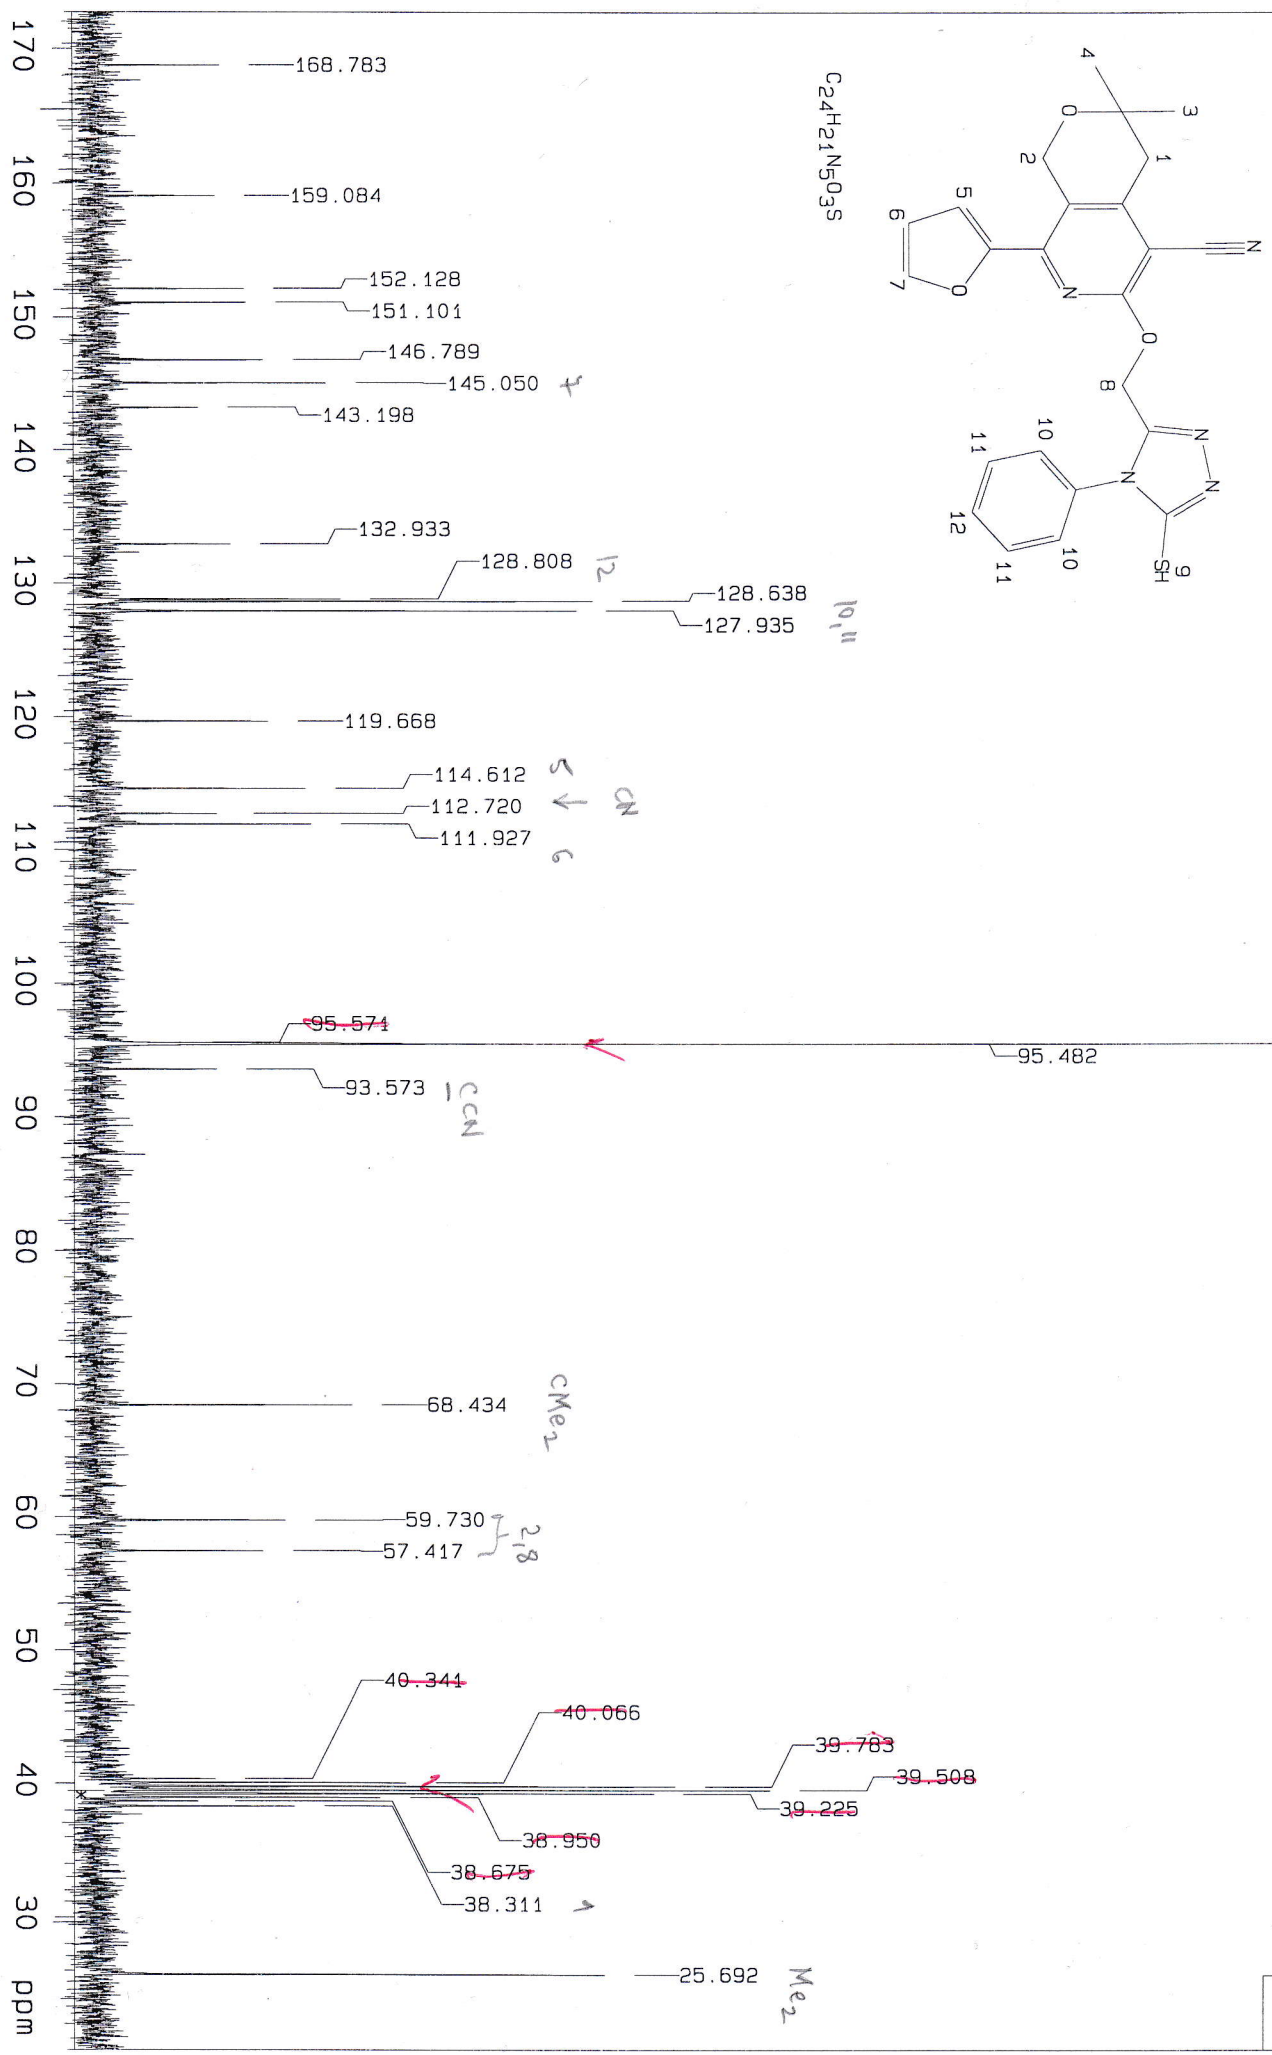

+ [Signature]

10a

Molecular Structure Research Centre, Yerevan, Armenia, Varian Mercury-300VX  
**HE-555**

H1 300.088 MHz, nt = 16, np = 32000, temp = 30.0 C, lb = -0.2, solvent = DMSO/CDCl<sub>4</sub> 1/3  
NOCI\_20 he-555

Sep 24 2020

Haol

+

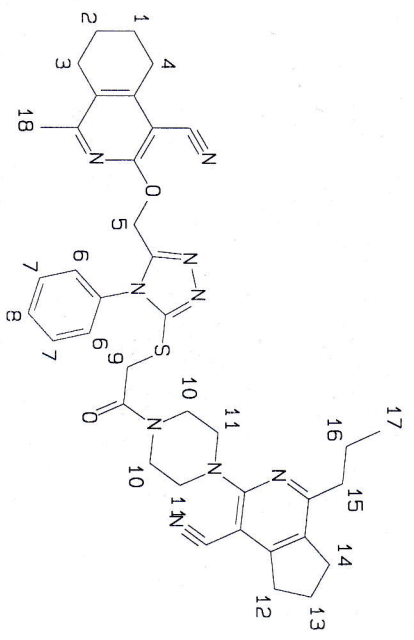

C<sub>38</sub>H<sub>41</sub>N<sub>9</sub>O<sub>2</sub>S

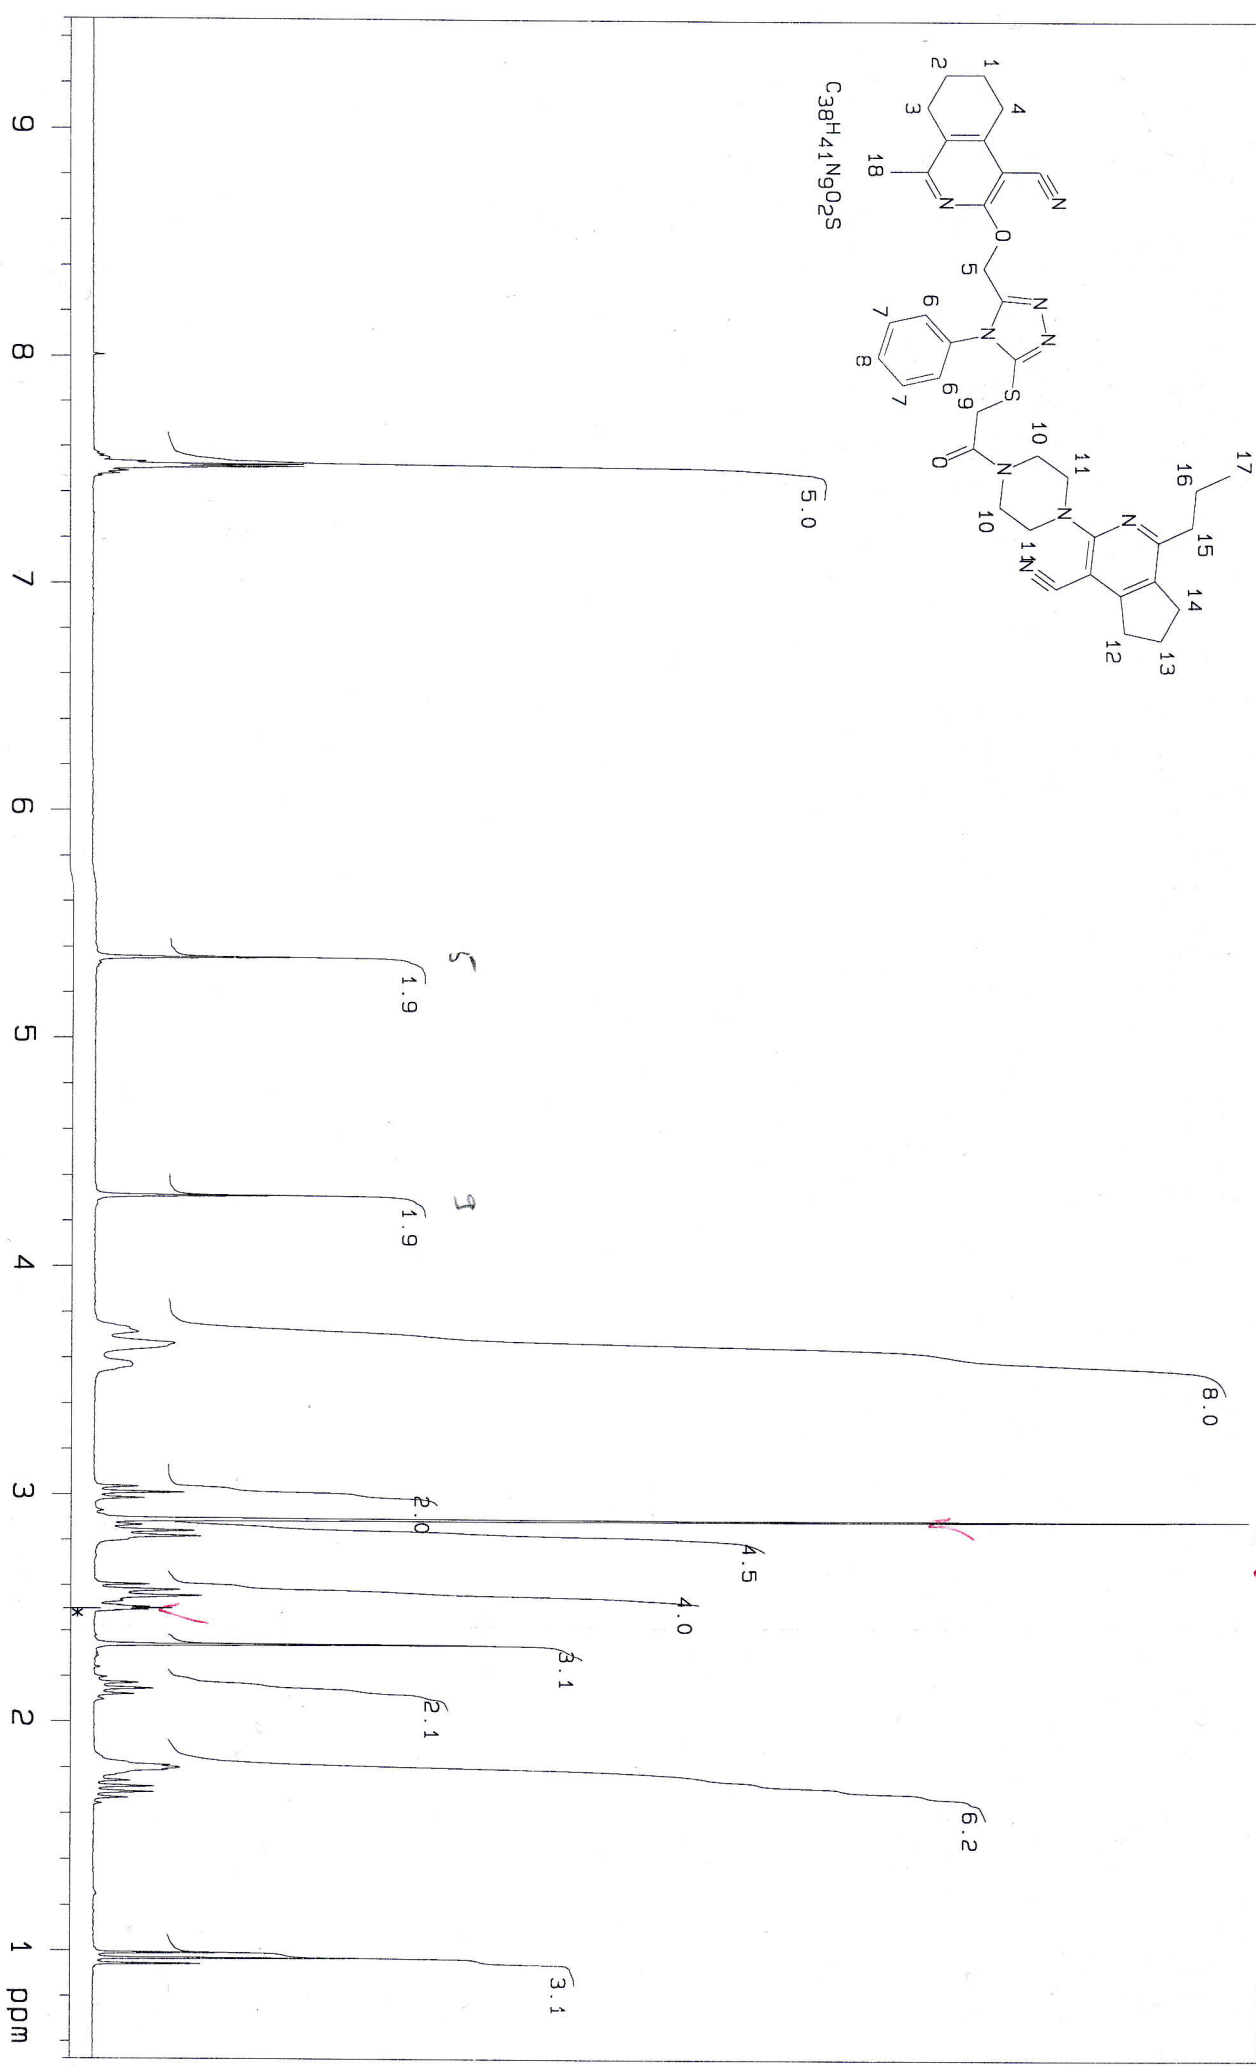



10a

Molecular Structure Research Centre, Yerevan, Armenia, Varian Mercury-300VX  
**HE-555**

C13 75.465 MHz, nt = 3424, np = 19998, temp = 30.0 C, lb = 1.0, solvent = DMSO/CDCl3

NOCI 20 he-555

Sep 24 2020

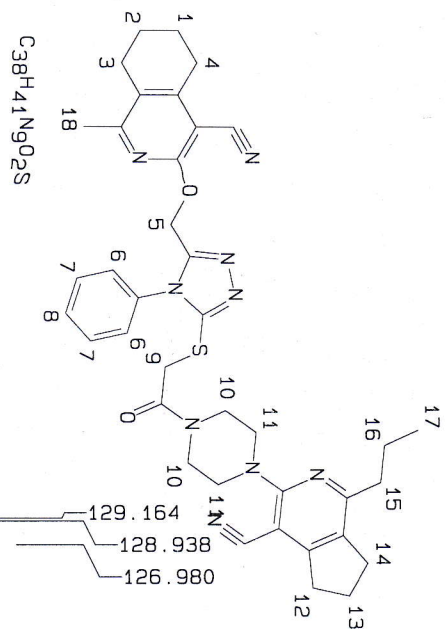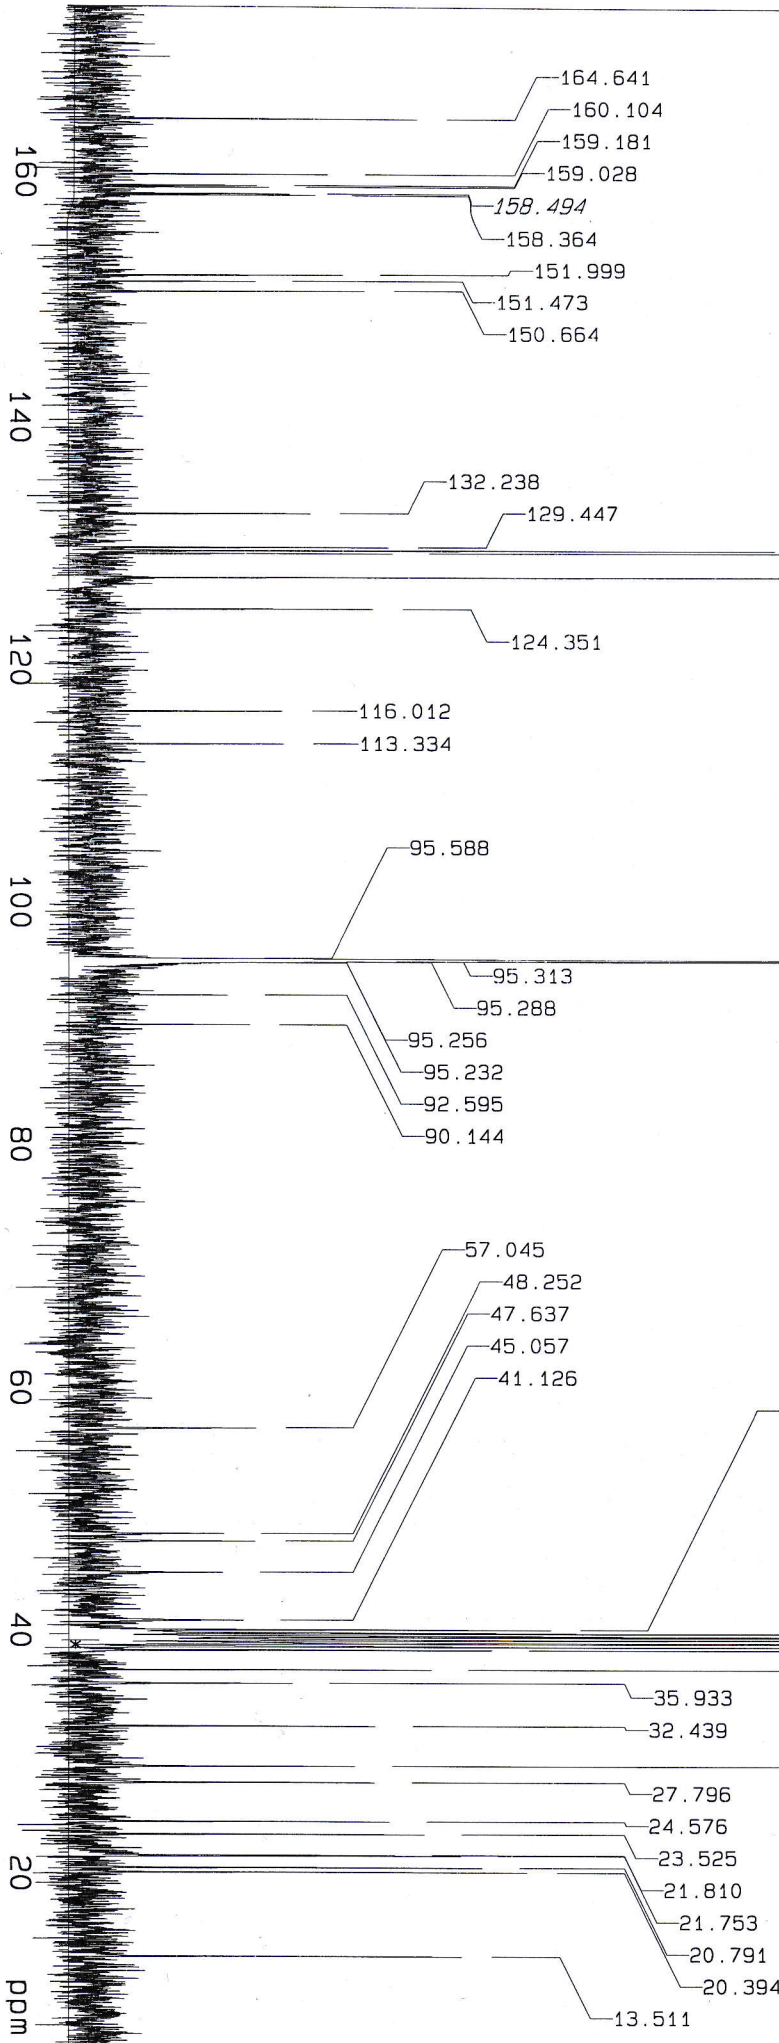

+

106

Molecular Structure Research Centre, Yerevan, Armenia, Varian Mercury-300VX  
**HE-556**

H1 300.088 MHz, nt = 16, np = 32000, temp = 30.0 C, lb = -0.2, solvent = DMSO/CdCl<sub>4</sub> 1/3

NOCI\_20 he-556

Sep 30 2020

+  
*Cur*

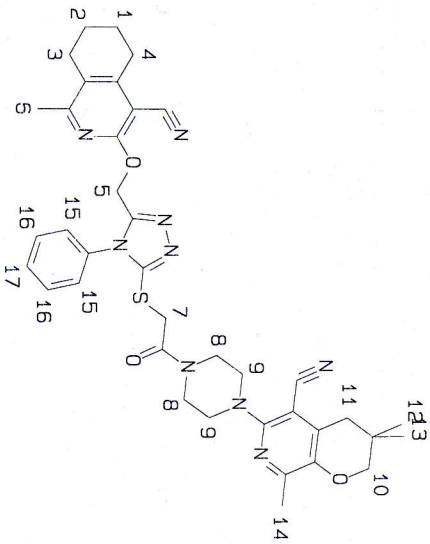

C<sub>38</sub>H<sub>41</sub>N<sub>9</sub>O<sub>3</sub>S

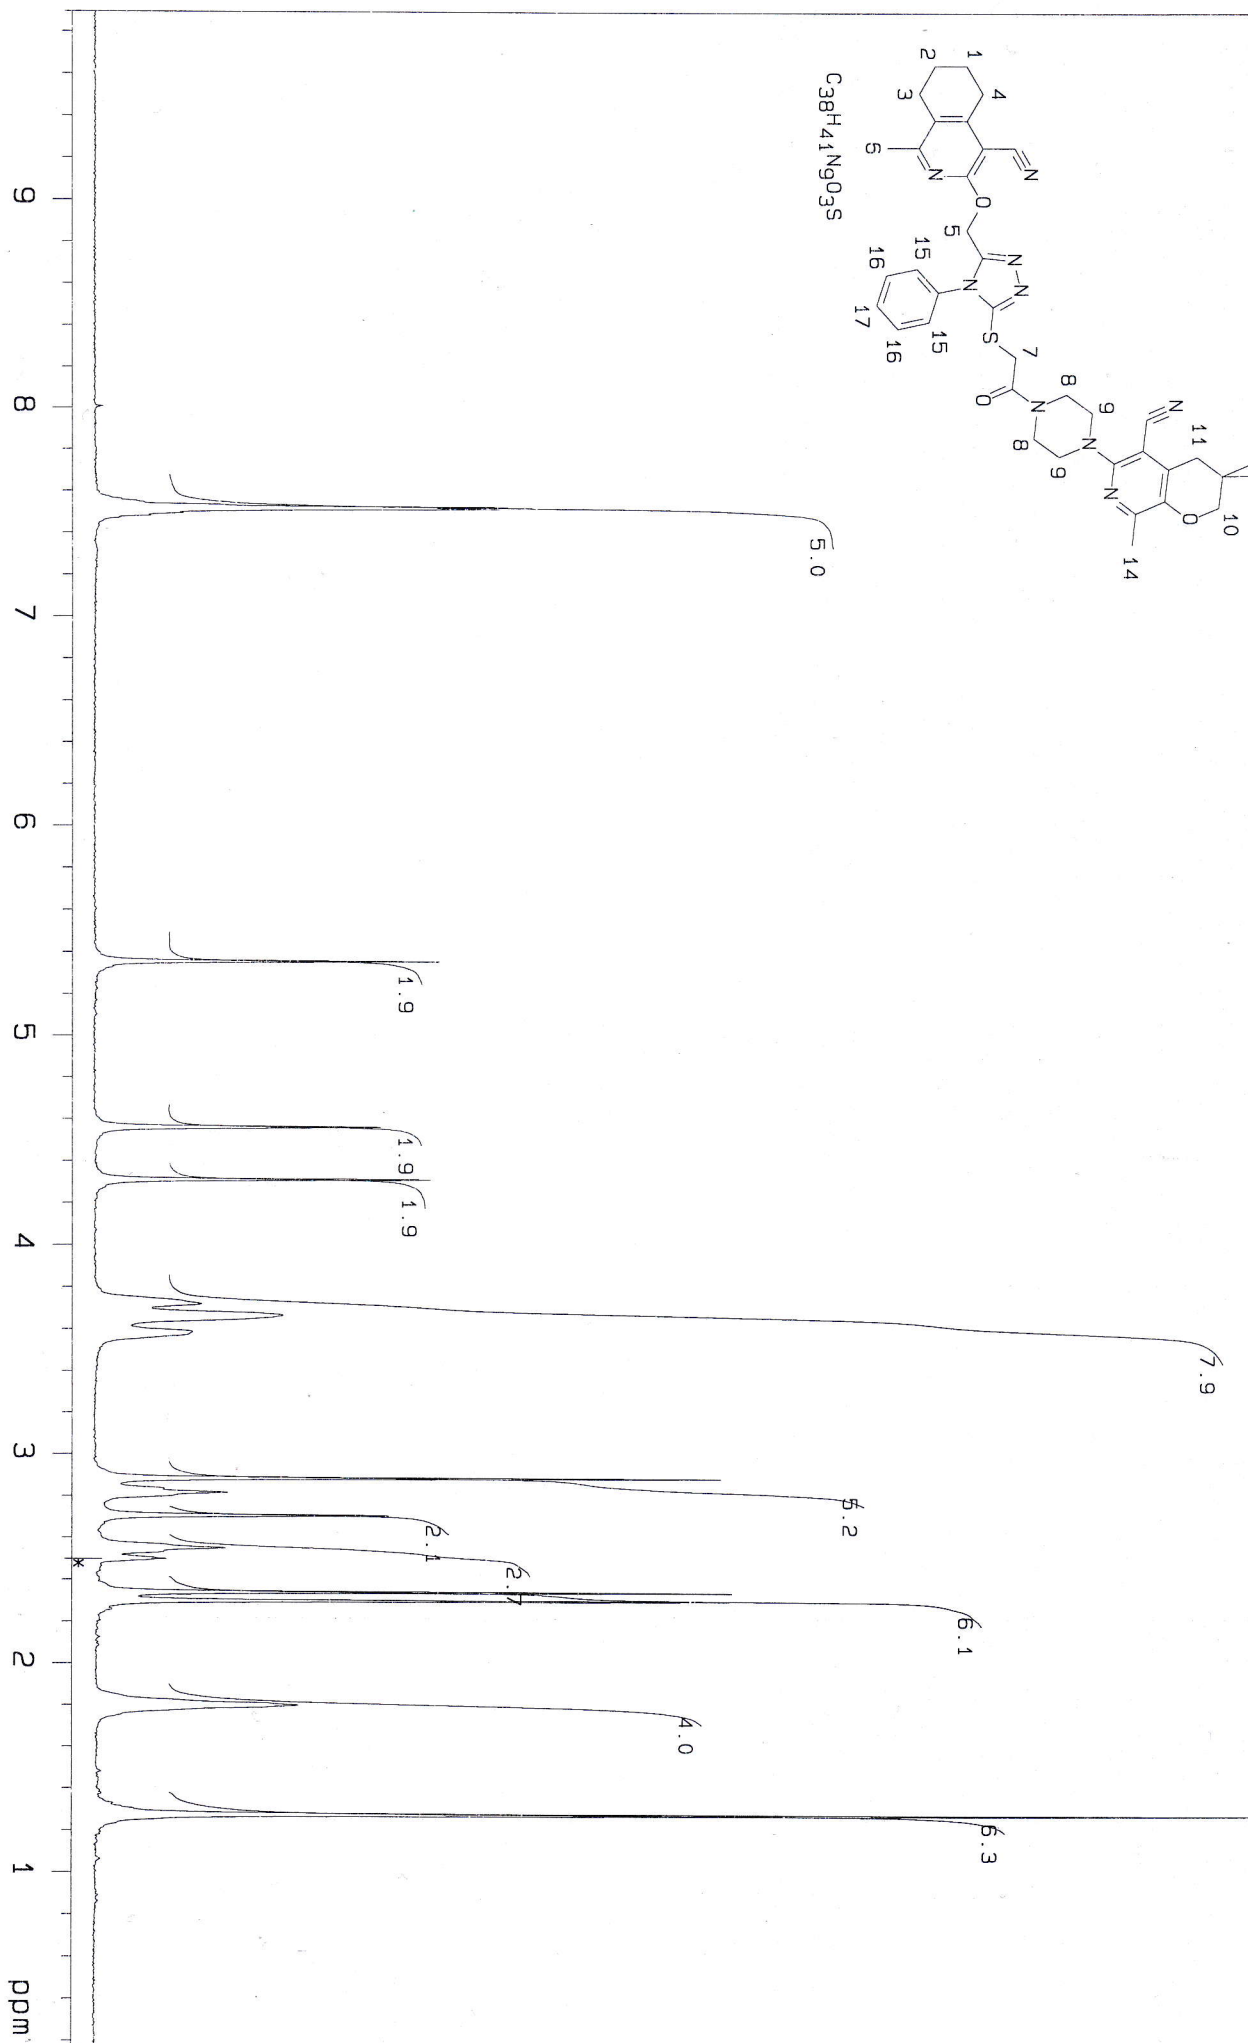



HE-556

C13 75.465 MHz, nt = 1664, np = 19998, temp = 30.0 C, lb = 1.0, solvent = DMSO-C4 1/3

NOCI\_20 he-556

Sep 30 2020

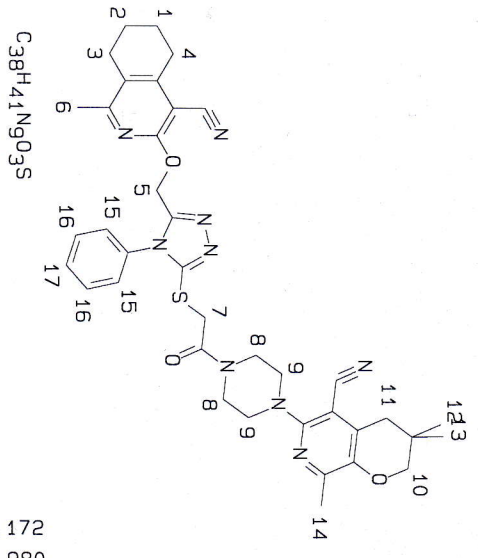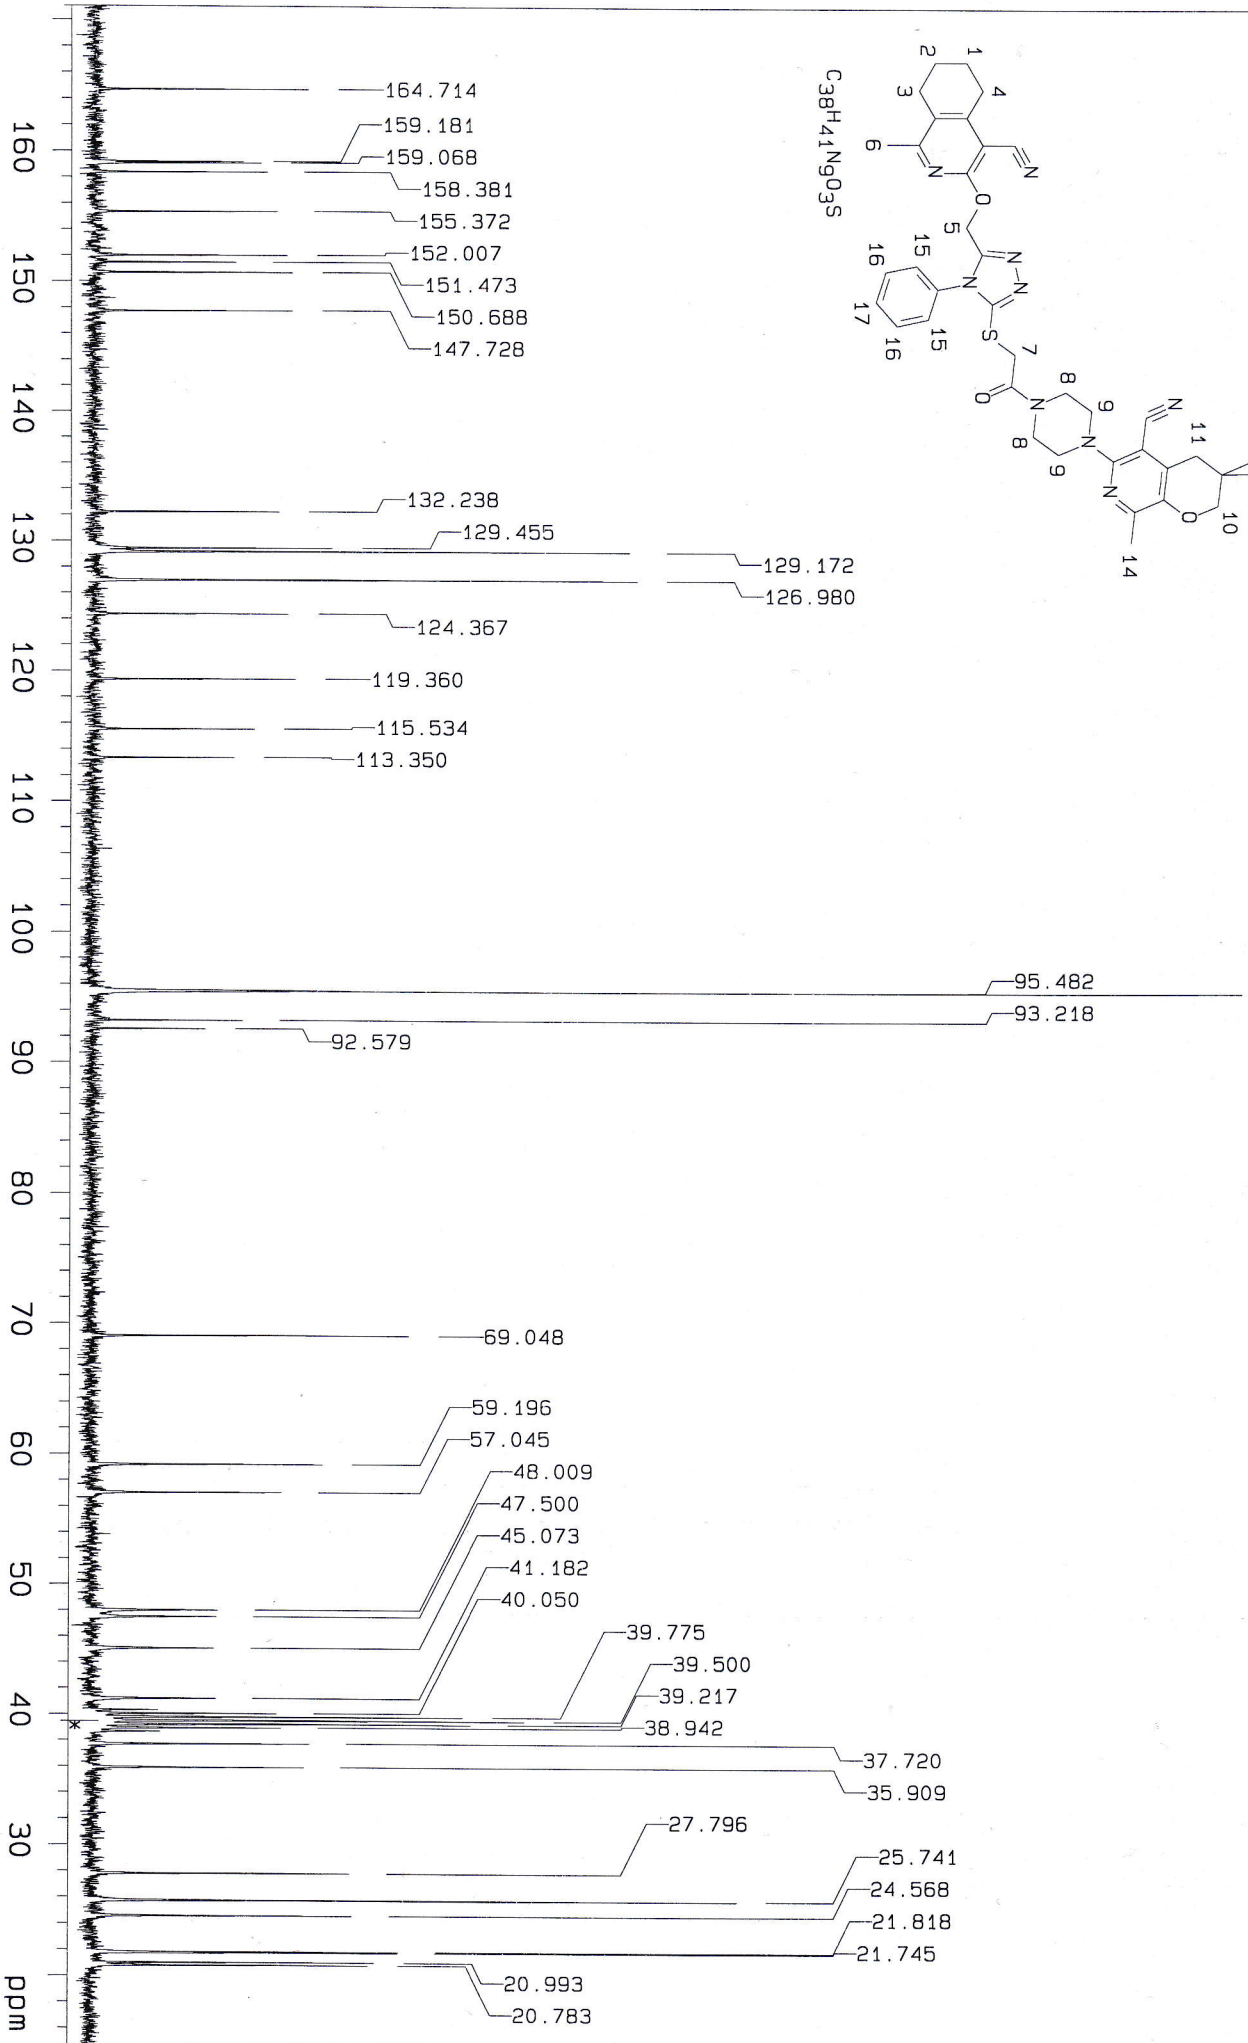

+  
[Signature]

106

31.01.2024

HE-5567 (0.141) Cm (4:10)

6.00000000

1: TOF MS ES+

4.11e6

704.3135

*CMV*

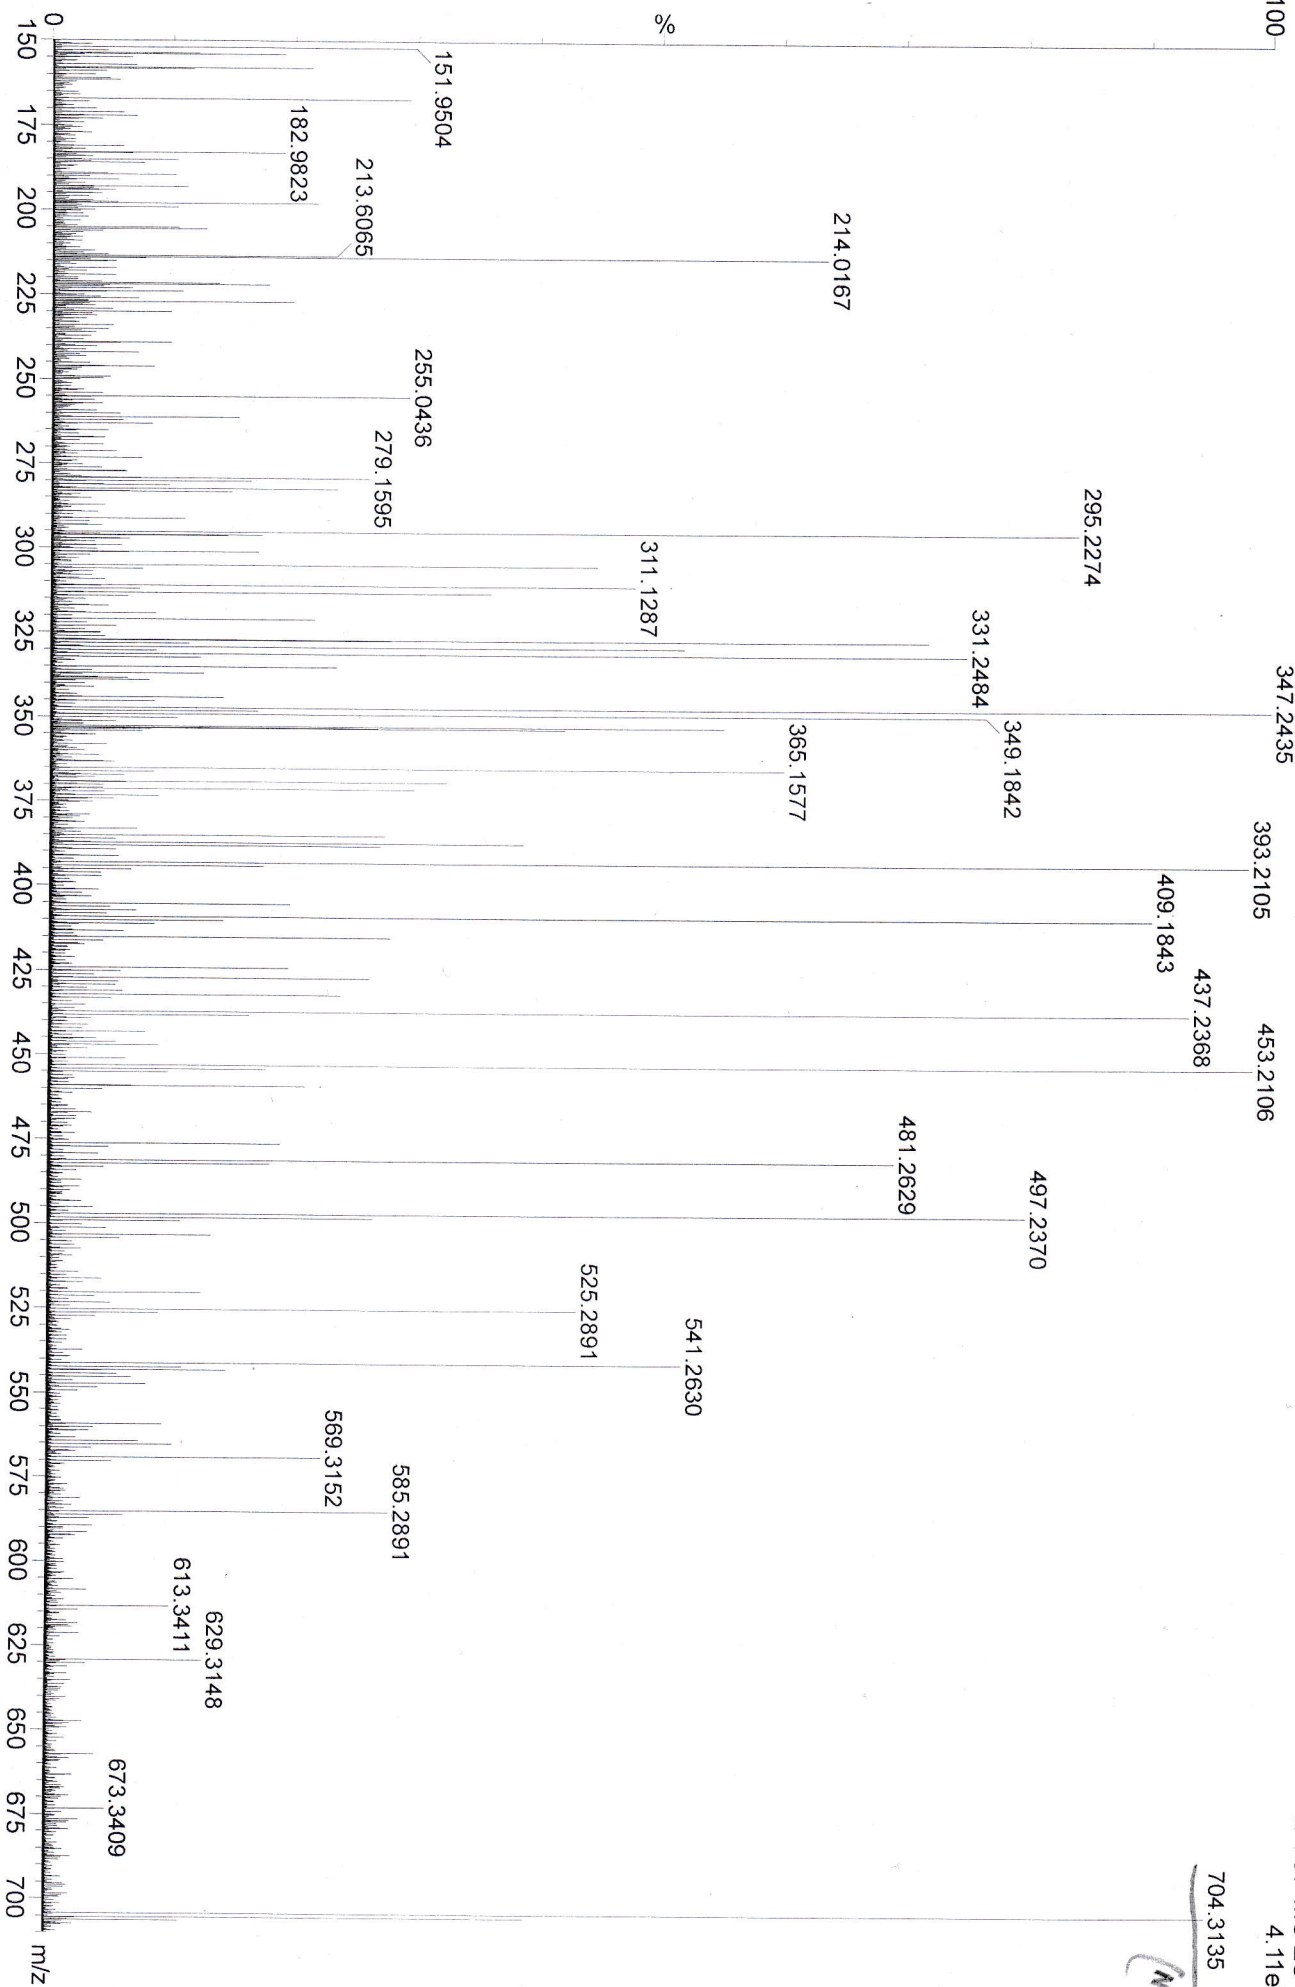

HE-558

NOCI\_20 he-558

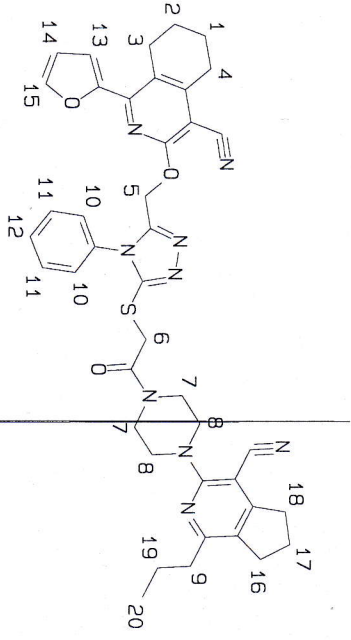

C<sub>41</sub>H<sub>41</sub>N<sub>9</sub>O<sub>3</sub>S

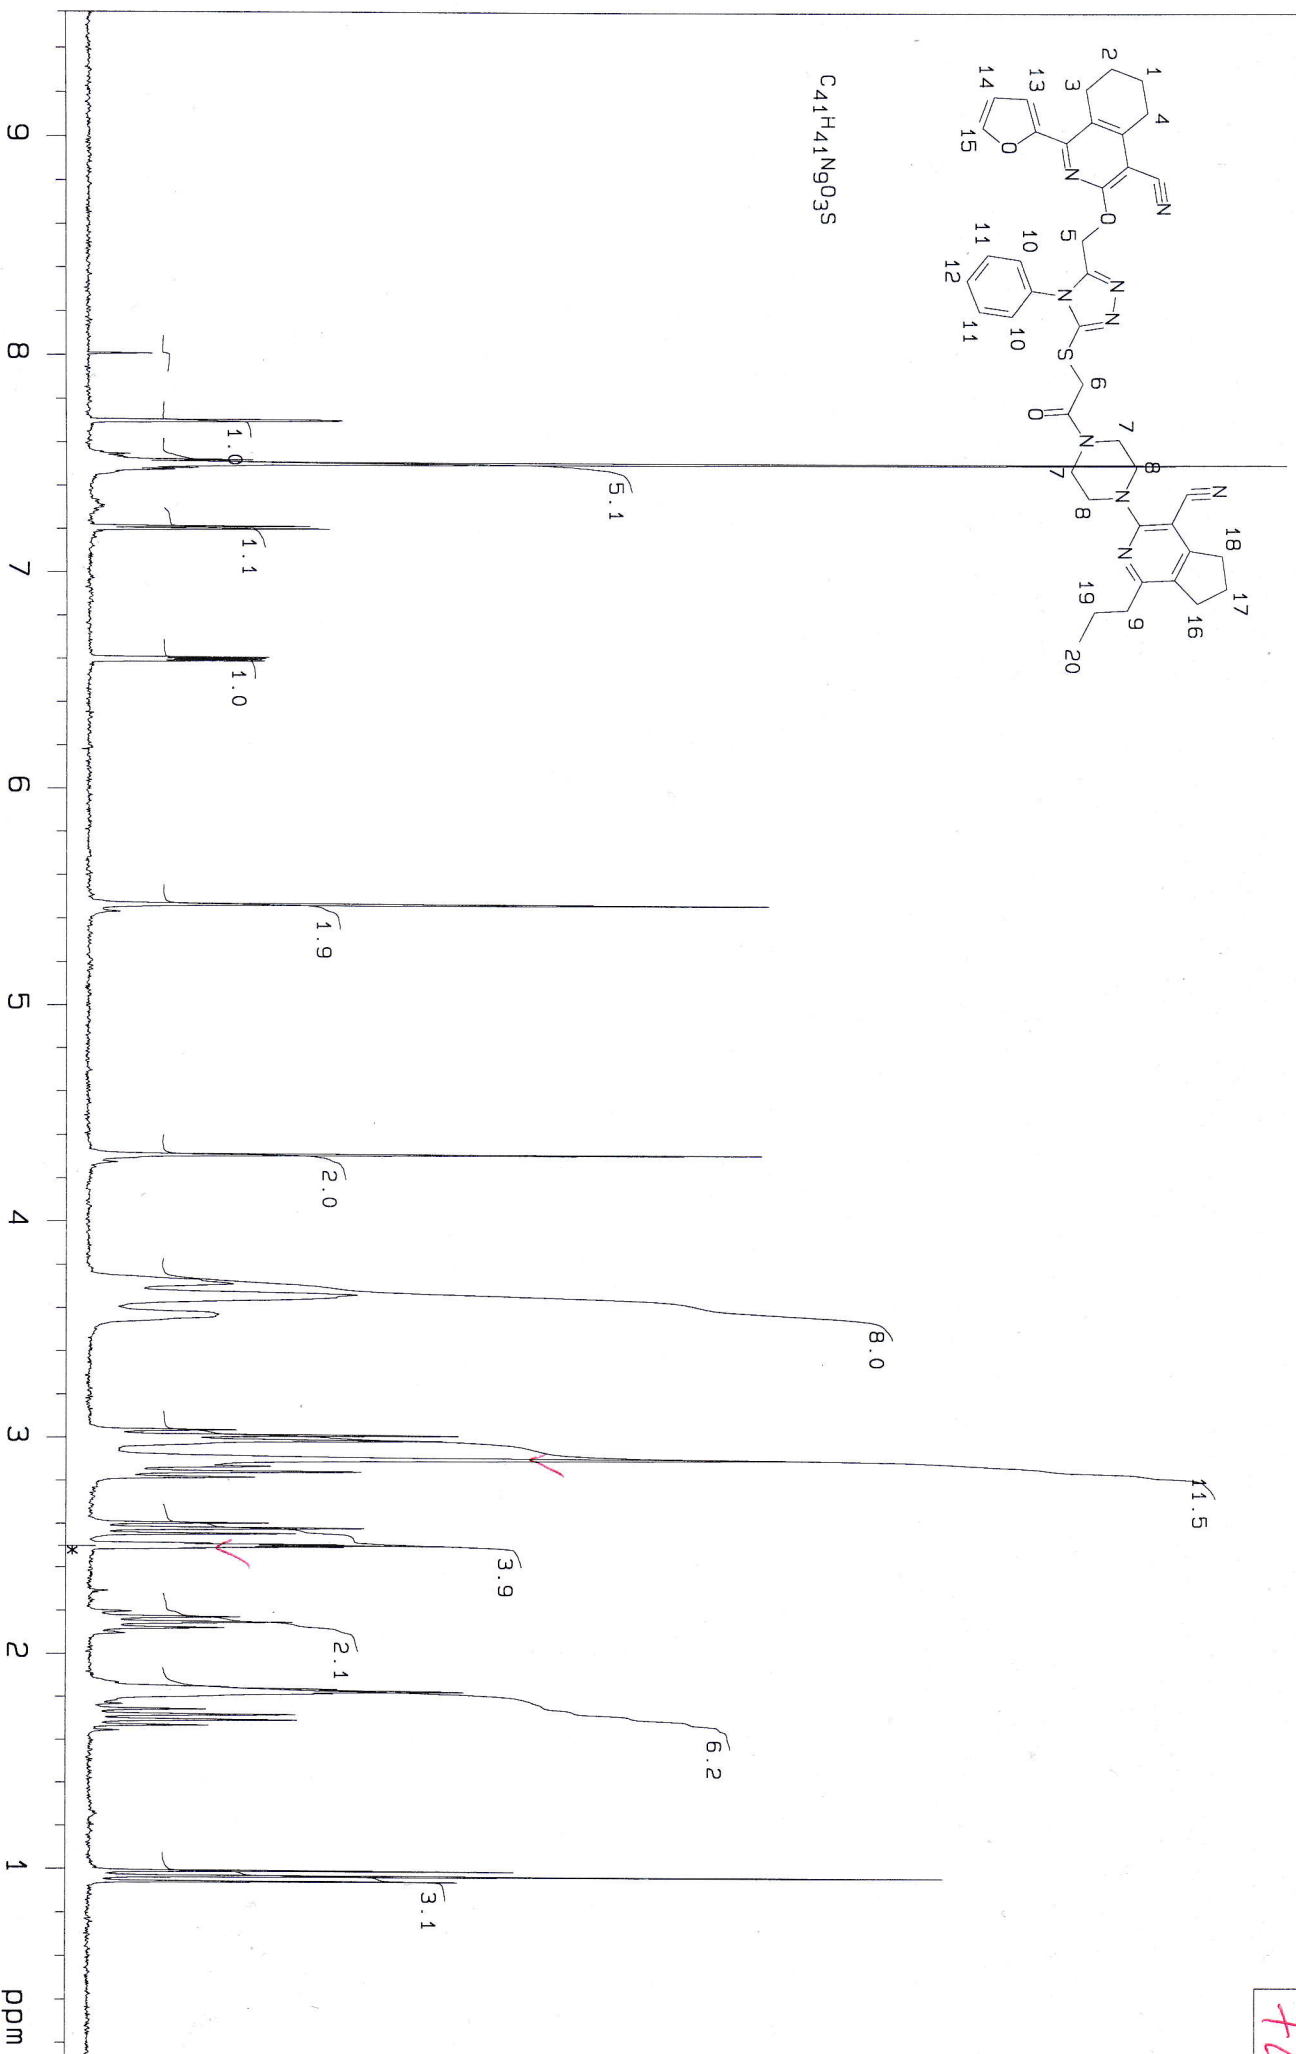

+ Prof

10e

HE-558  
Molecular Structure Research Centre, Yerevan, Armenia, Varian Mercury-300VX

C13 75.464 MHz, nt = 1632, np = 19998, temp = 30.0 C, lb = 1.0, solvent = DMSO/CDCl4 1/3  
NOCI\_20 he-558

Oct 6 2020

+ Conf

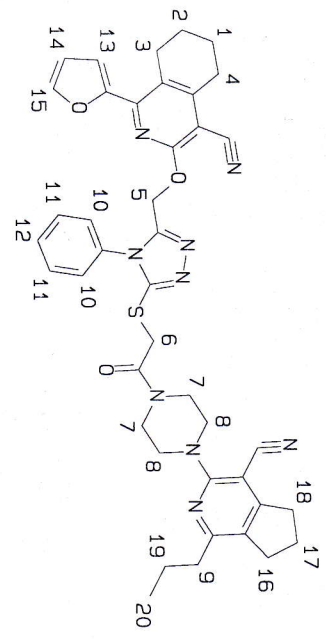

C<sub>41</sub>H<sub>41</sub>N<sub>9</sub>O<sub>3</sub>S

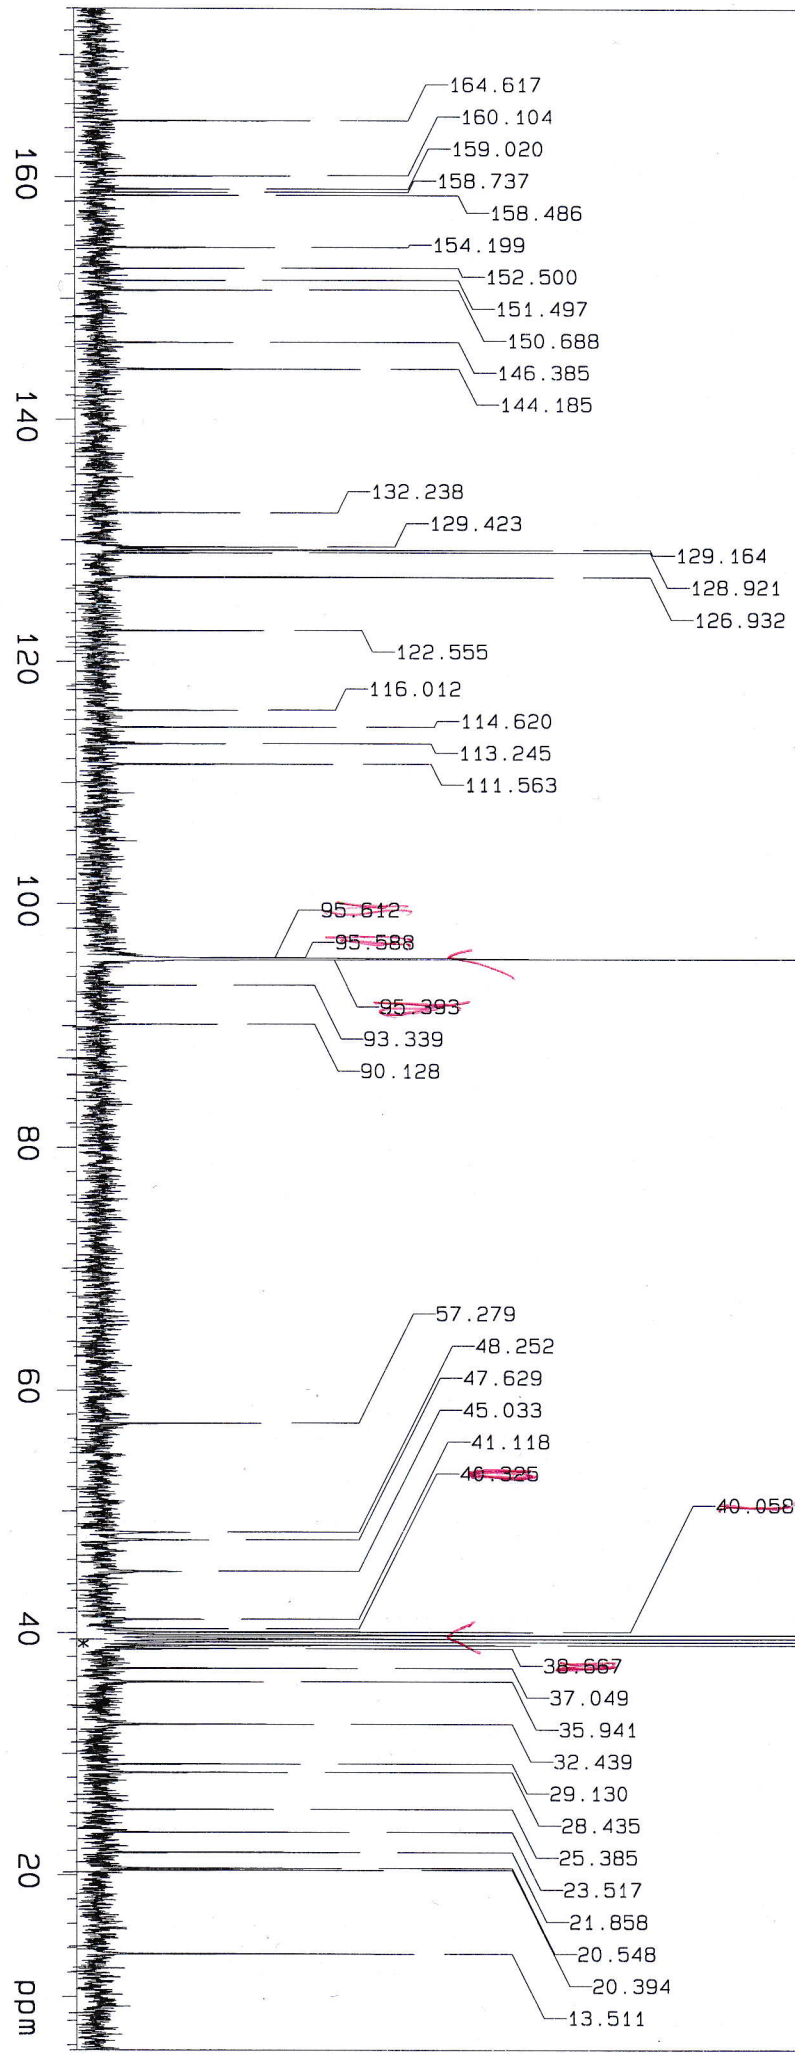





104

Molecular Structure Research Centre, Yerevan, Armenia, Varian Mercury-300VX  
HE-557

C13 75.465 MHz, nt = 1392, np = 19938, temp = 30.0 C, lb = 1.0, solvent = DMSO/C14 1/3

NOCI\_20 he-557

Oct 2 2020

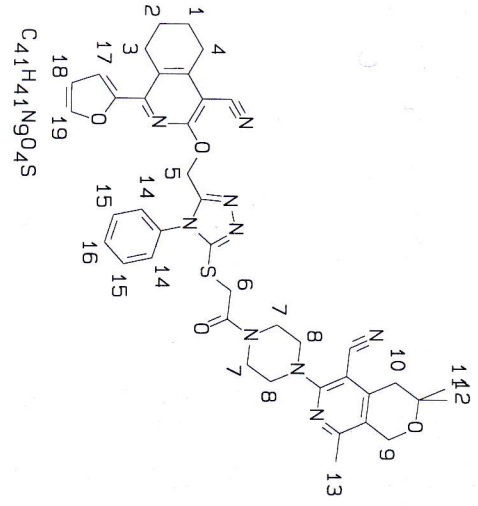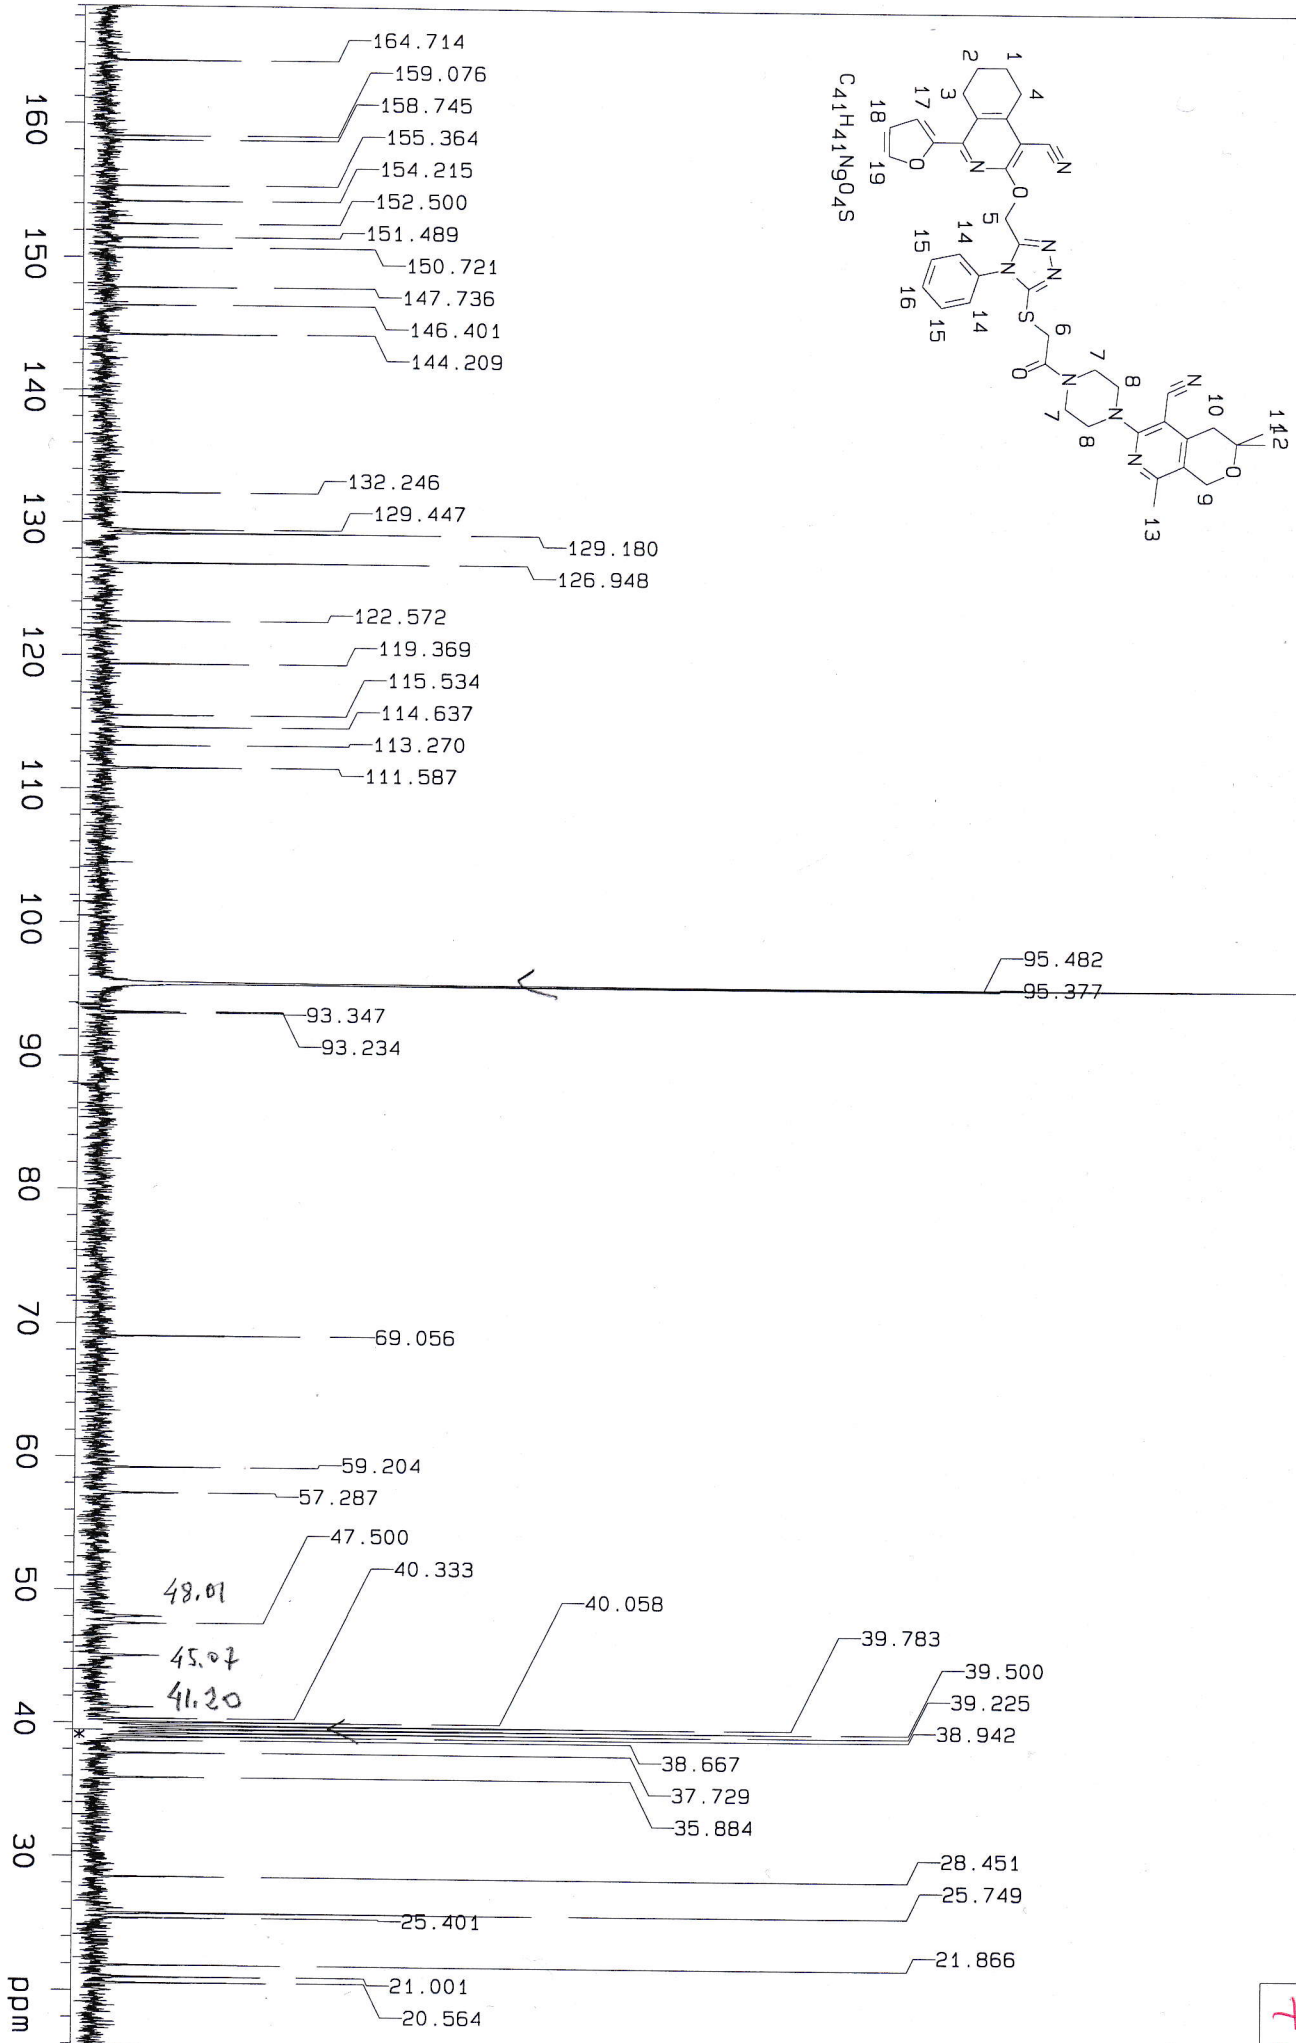

7  
*[Signature]*

10d

31.01.2024

HE-557 7 (0.141) Cm (5:10)

6.00000000

1: TOF MSES+

3.64e6

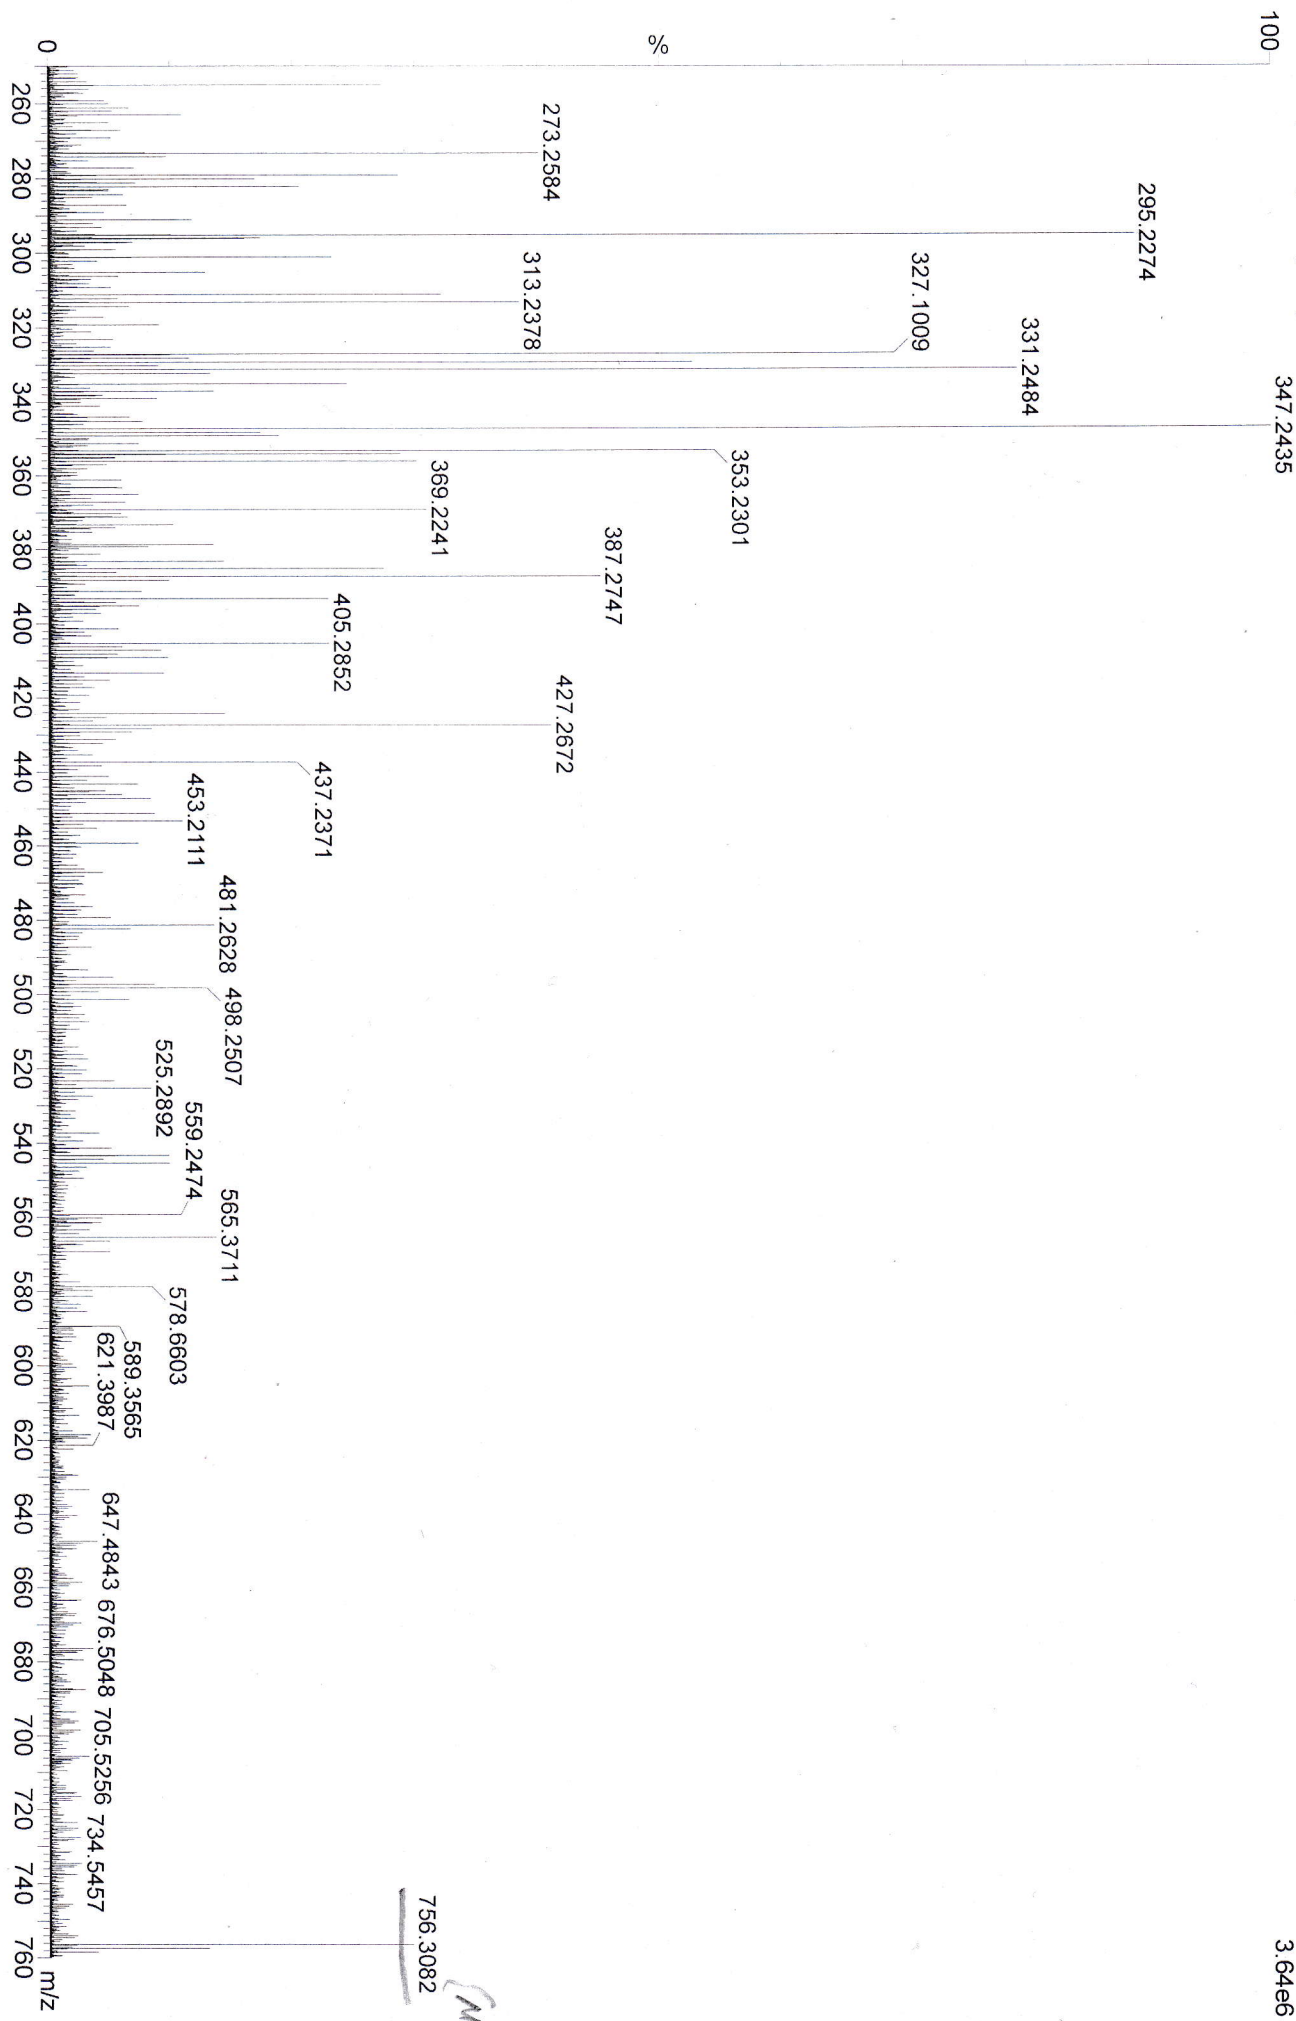

CMH



10e

Molecular Structure Research Centre, Yerevan, Armenia, Varian Mercury-300VX  
**T20-216**

H1 300.088 MHz, nt = 16, np = 32000, temp = 30.0 C, lb = 0.2, solvent = DMSO

ANUSH\_TEMA t20-216

Jan 20 2023

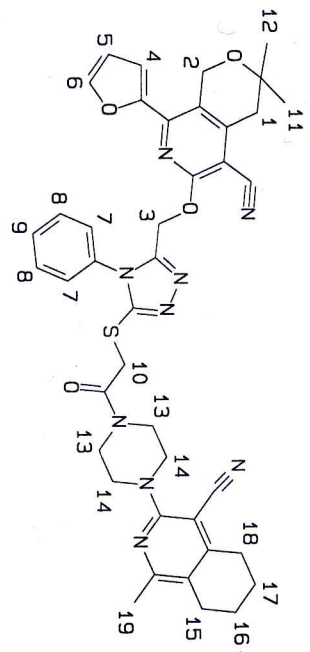

C41H41NgO4S

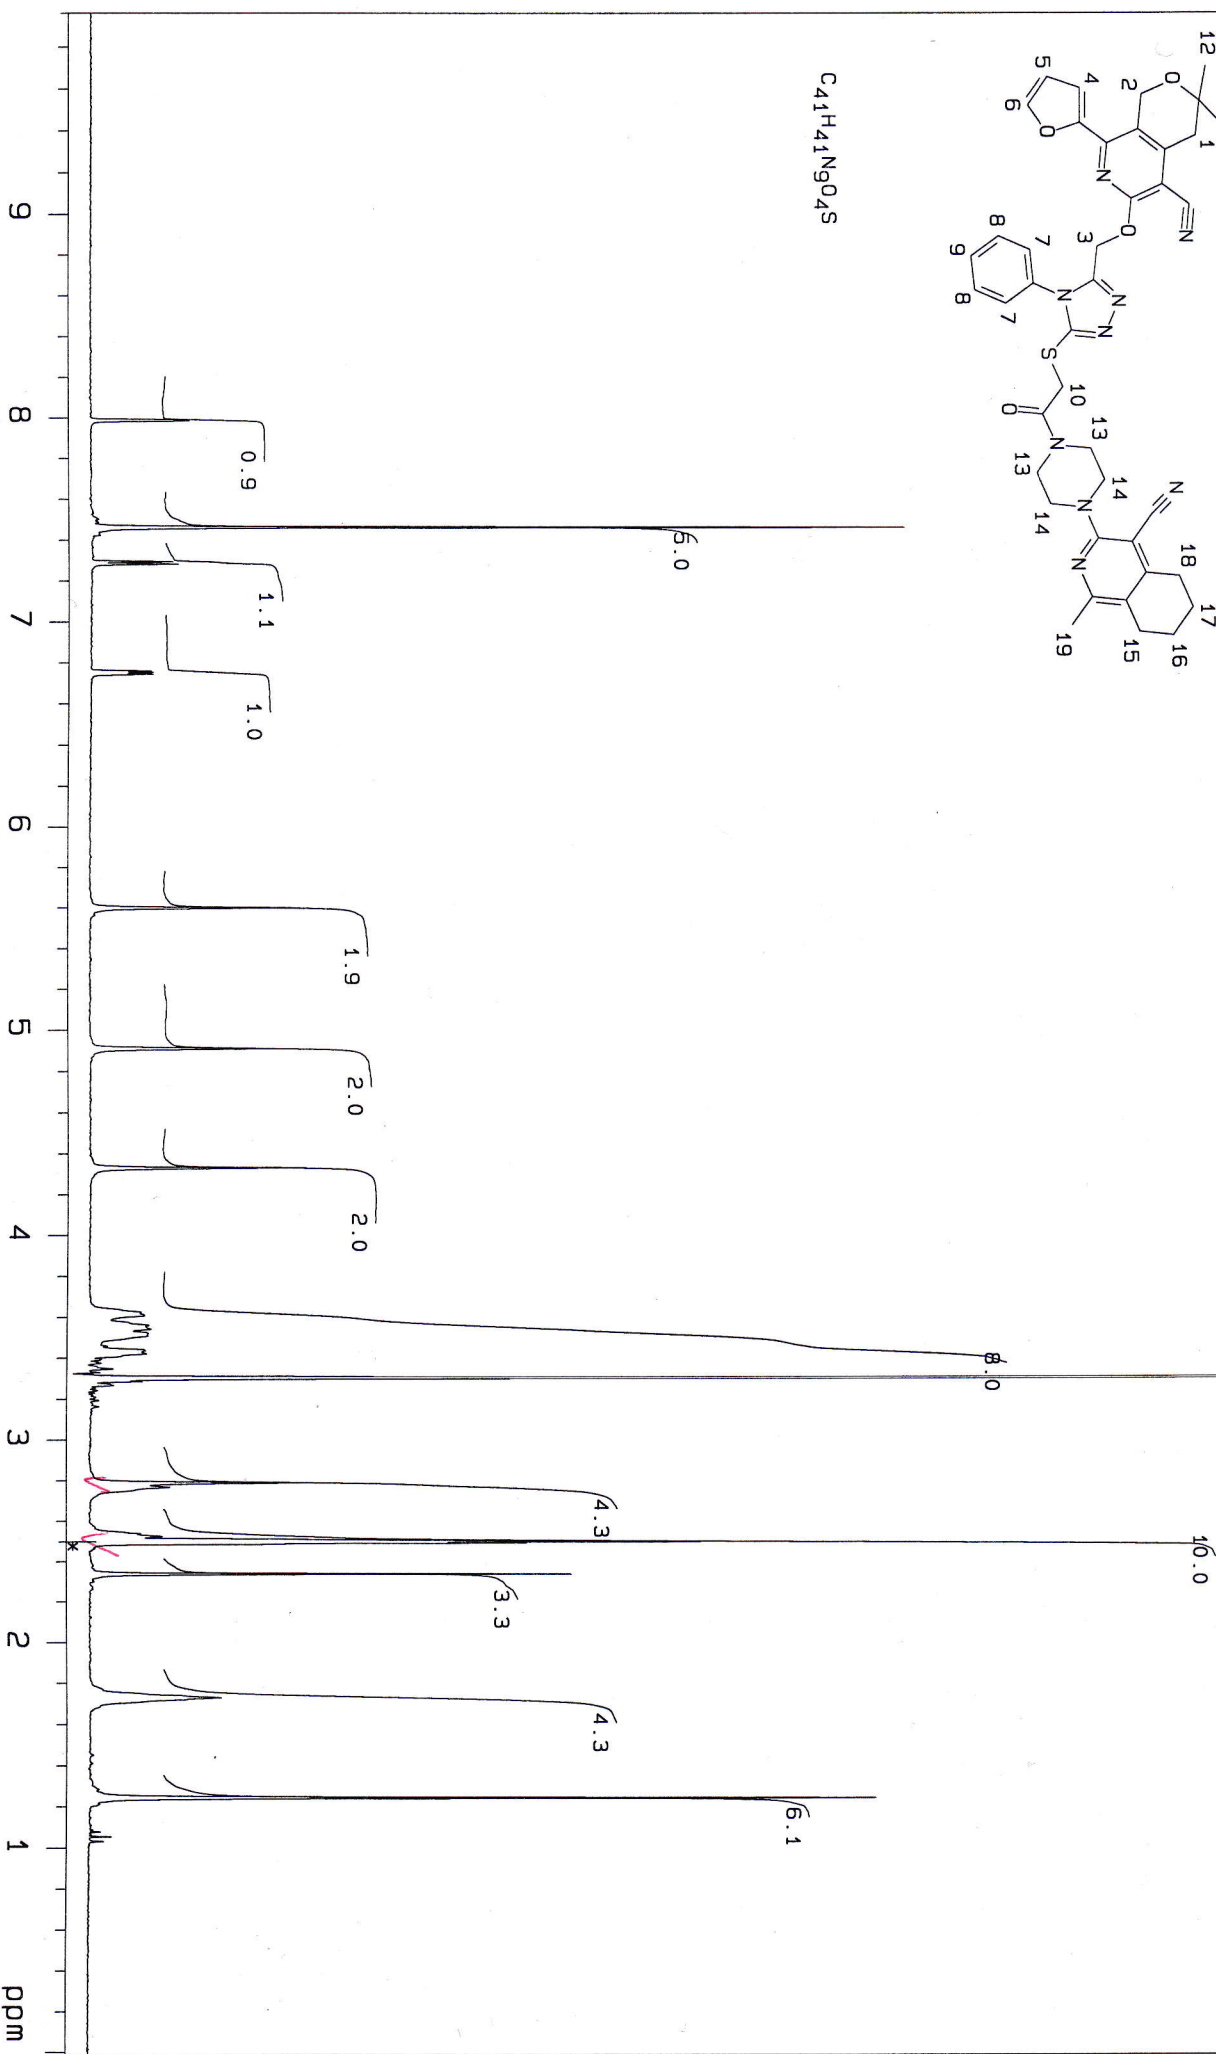

+  
*[Signature]*

10e

Molecular Structure Research Centre, Yerevan, Armenia, Varian Mercury-300VX  
**T20-216**

C13 75.465 MHz, nt = 768, np = 19998, temp = 30.0 C, lb = 1.0, solvent = DMSO

ANUSH\_TEMA  
T20-216

Jan 20 2023

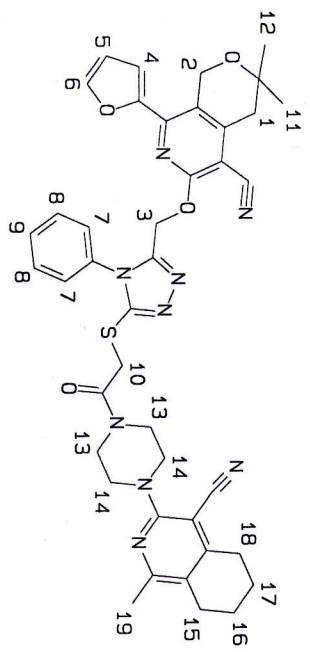

C<sub>41</sub>H<sub>41</sub>N<sub>9</sub>O<sub>4</sub>S

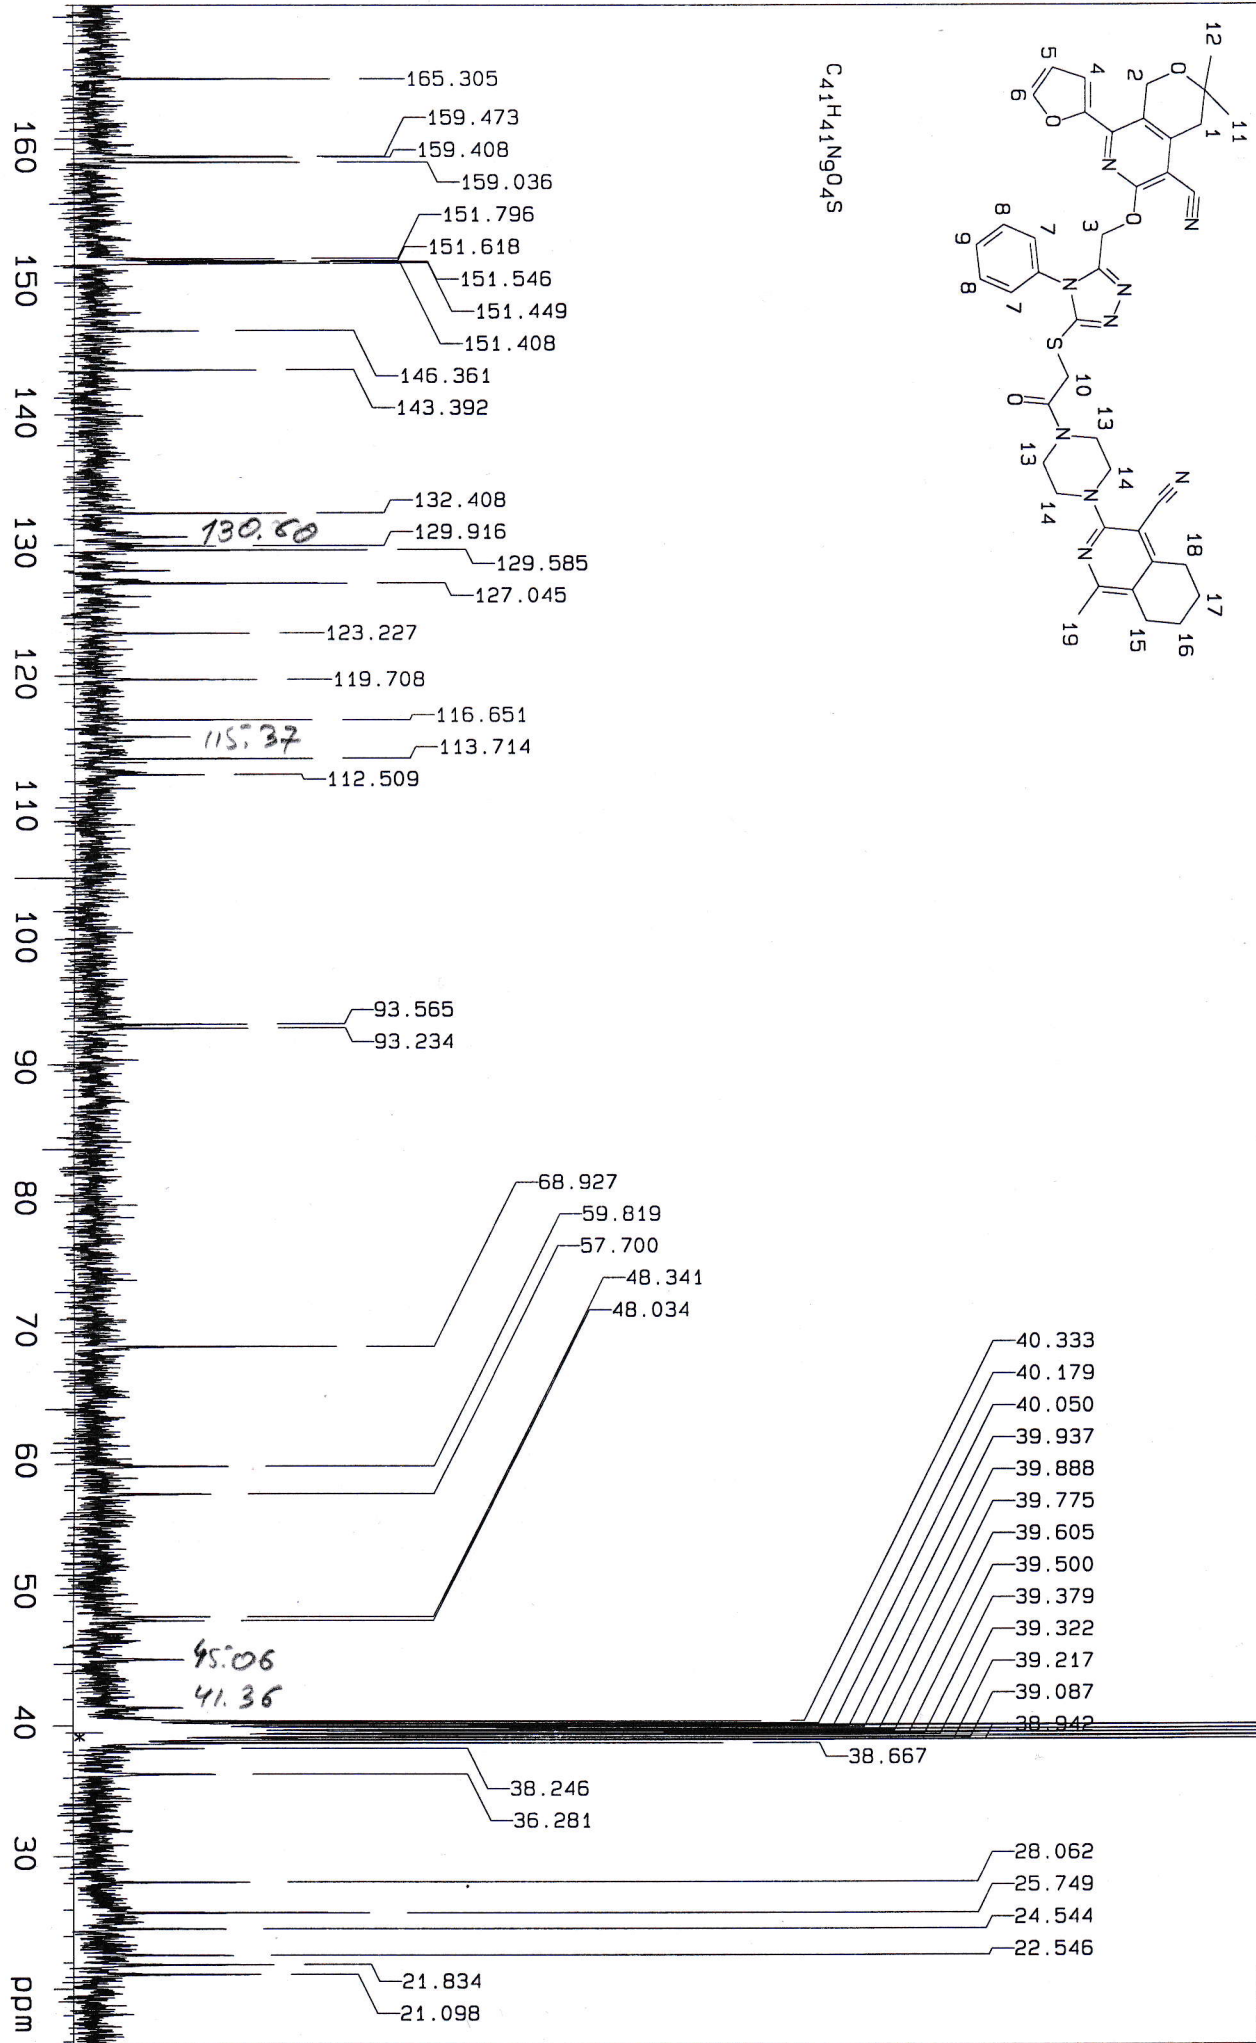

+

10f

Molecular Structure Research Centre, Yerevan, Armenia, Varian Mercury-300VX  
T20-054-1

H1 300.088 MHz, nt = 16, np = 32000, temp = 30.0 C, lb = -0.2, solvent = DMSO/Cd4 1/3

ANUSH\_TEMA E20-054-1

Mar 31 2021

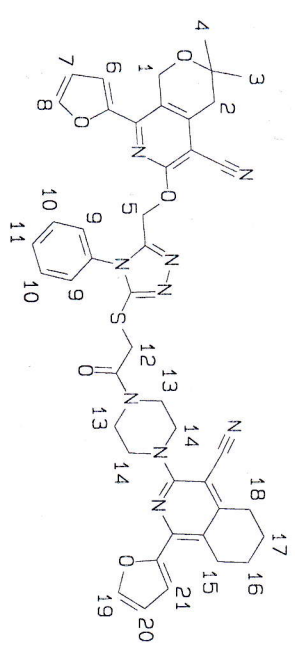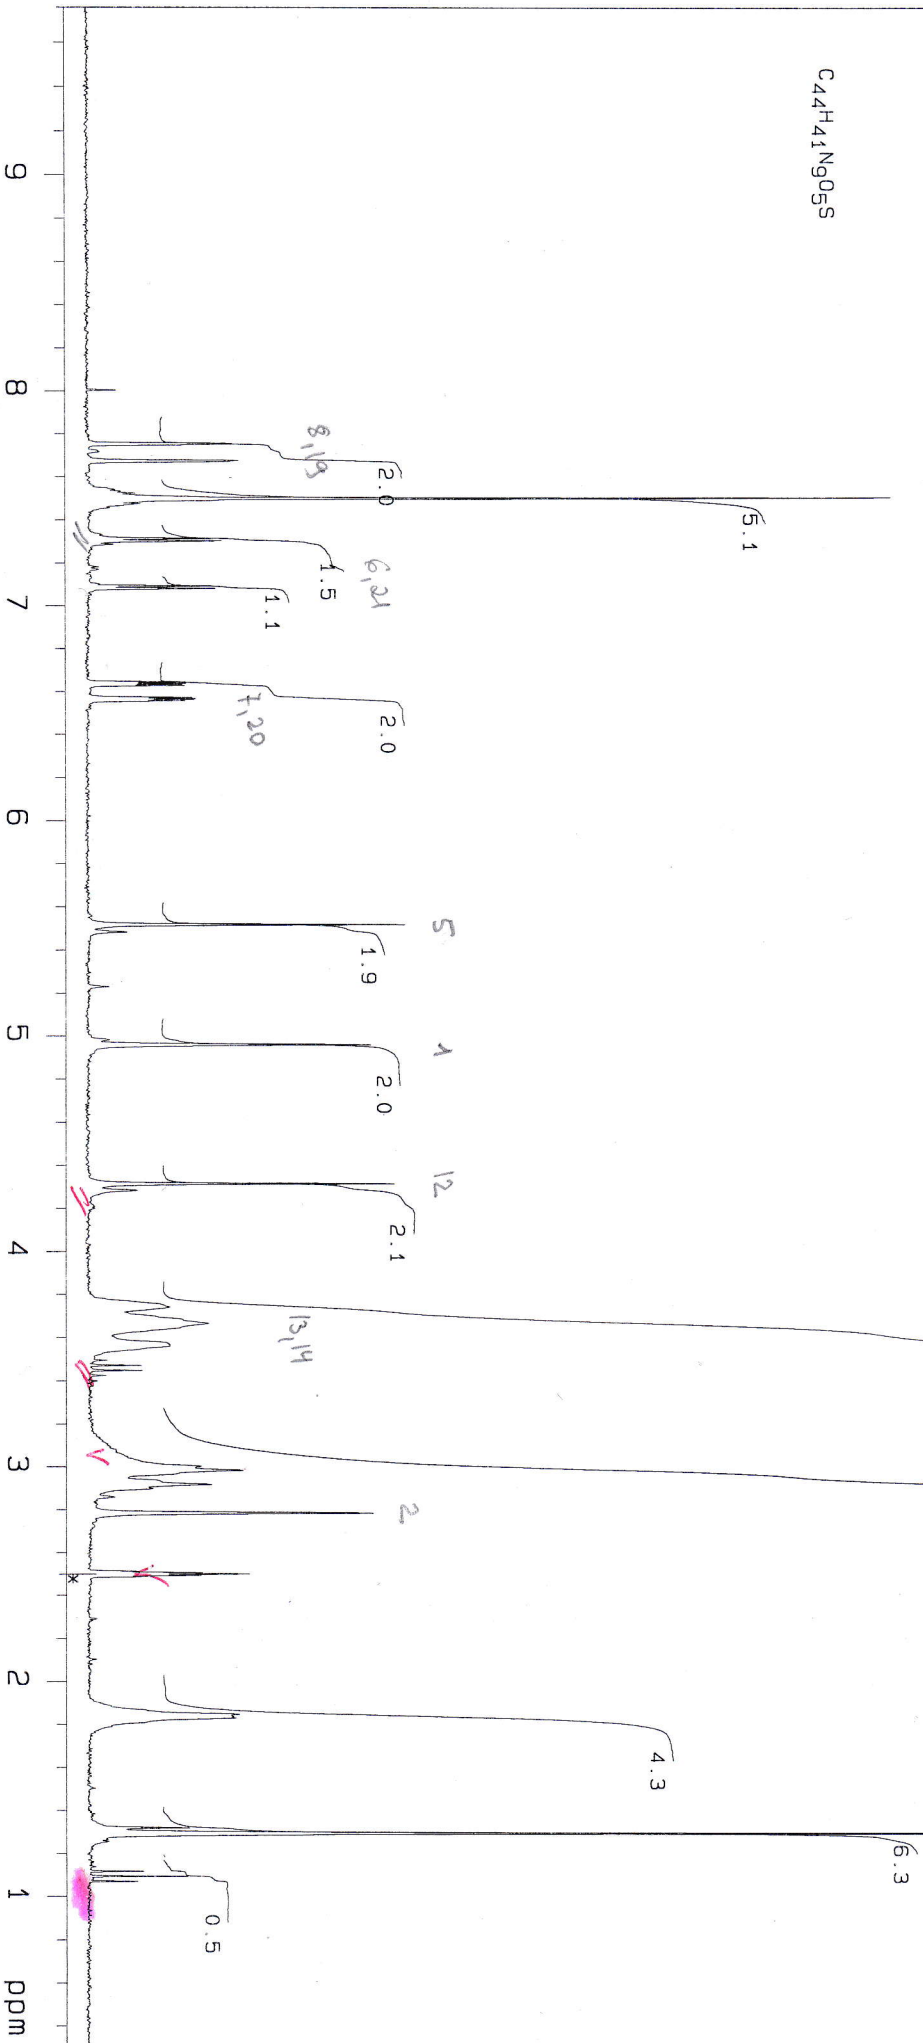

107

Molecular Structure Research Centre, Yerevan, Armenia, Varian Mercury-300VX  
T20-054-1

C13 75.465 MHz, nr = 640, mp = 19998, temp = 30.0 C, lb = 1.0, solvent = DMSO-CD3 1/3

ANUSH\_TEMMA T20-054-1

Mar 31 2021

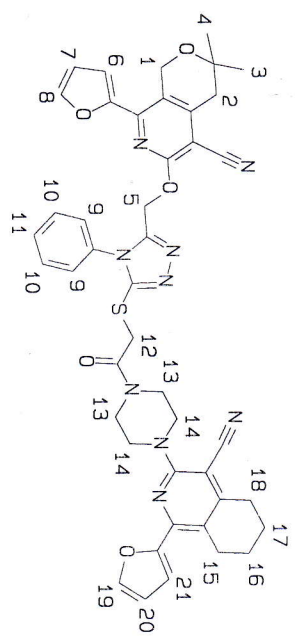

C<sub>44</sub>H<sub>41</sub>N<sub>9</sub>O<sub>5</sub>S

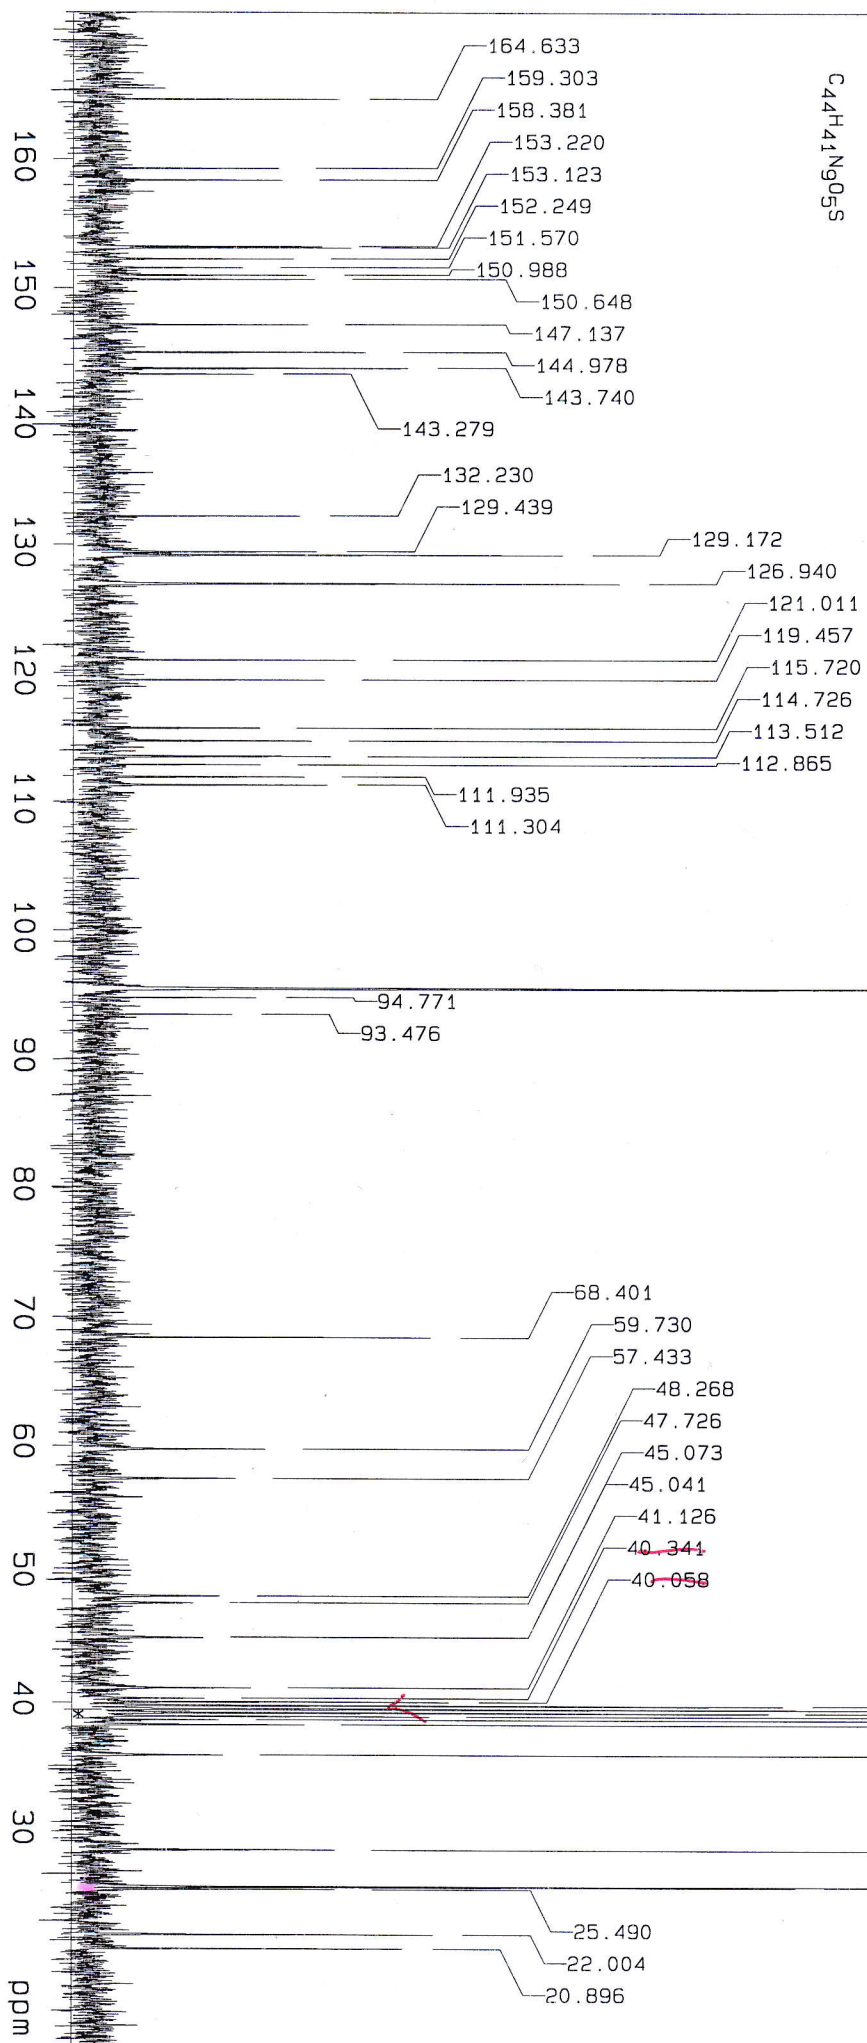

+ [Signature]



109

Molecular Structure Research Centre, Yerevan, Armenia, Varian Mercury-300VX  
T20-055-2

H1 300.088 MHz, nt = 16, np = 32000, temp = 30.0 C, lb = -0.2, solvent = DMSO/Cd4 1/3

ANUSH\_TEMA t20-055-2

Apr 23 2021

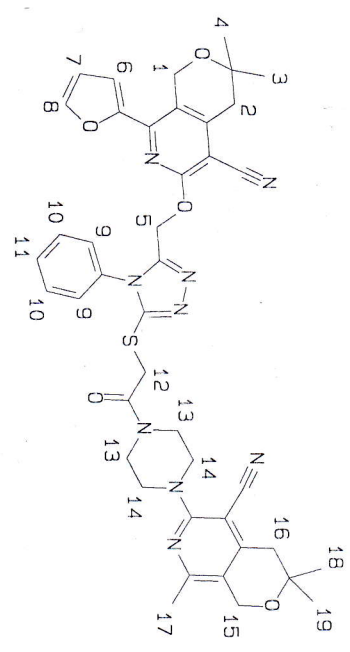

C<sub>42</sub>H<sub>43</sub>N<sub>g</sub>O<sub>5</sub>S

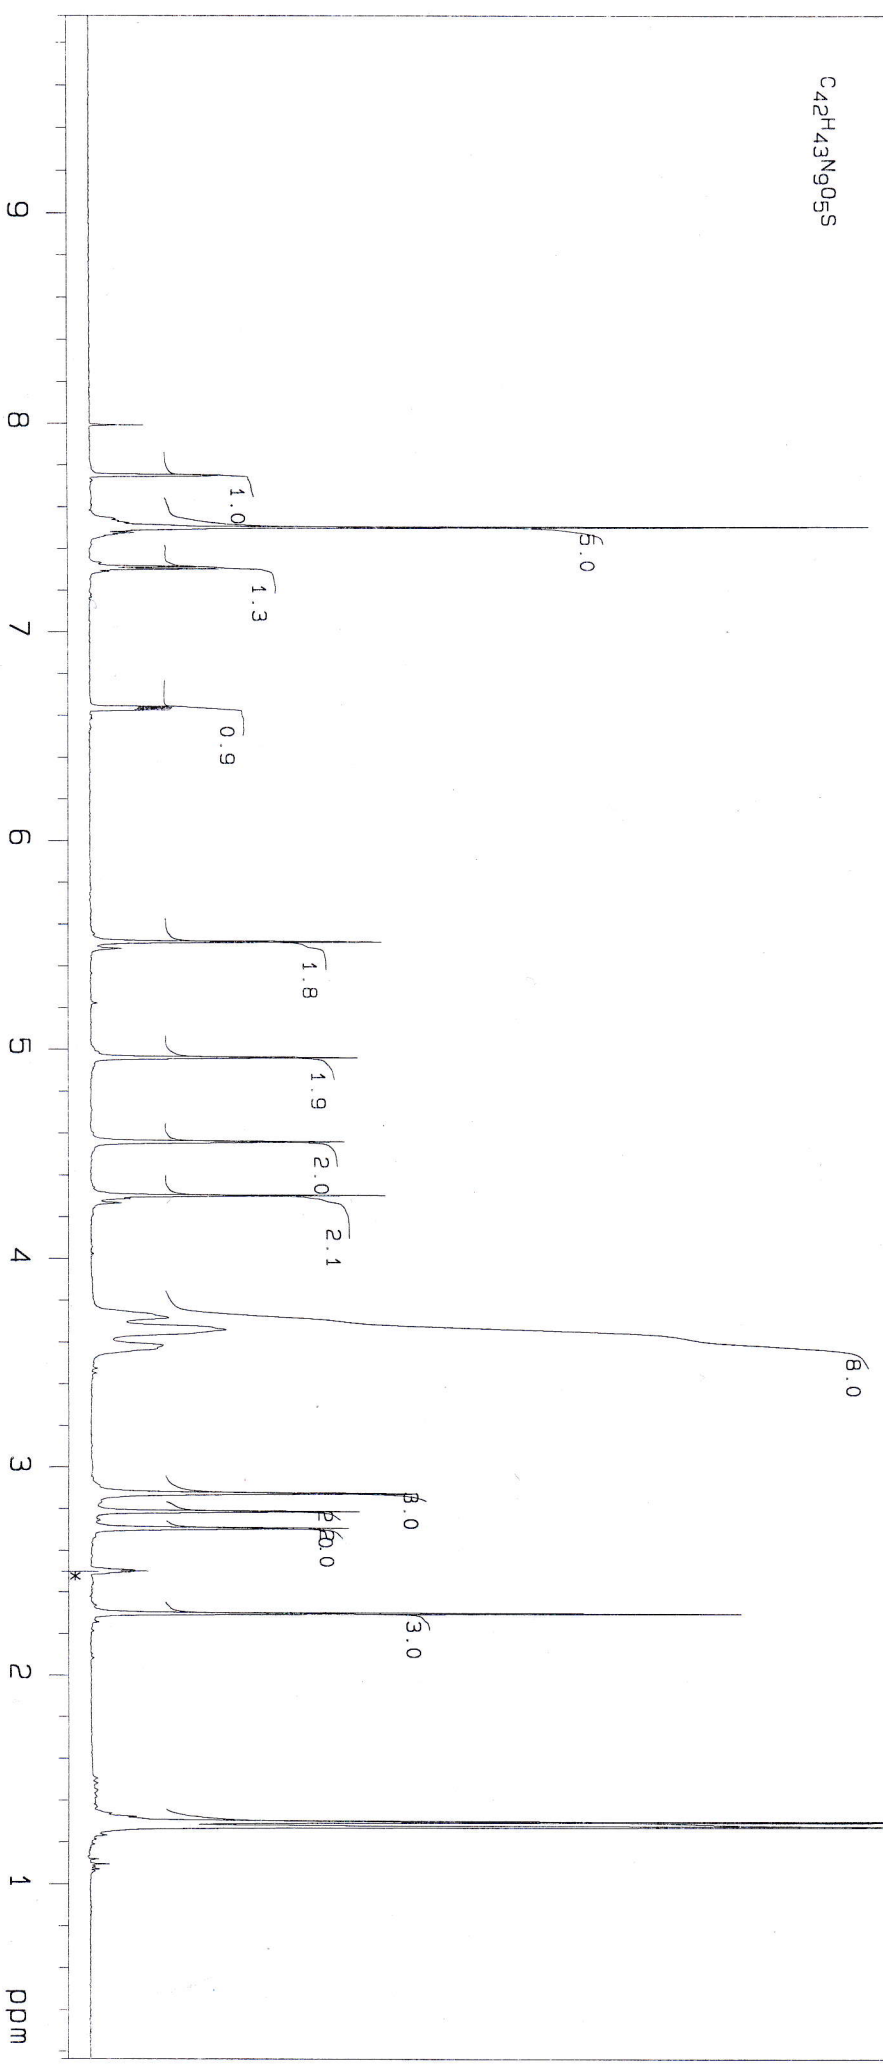

+ Conf

109

Molecular Structure Research Centre, Yerevan, Armenia, Varian Mercury-300VX  
T20-055-2

C13 75.465 MHz, n=864, np=19998, temp=30.0 C, lb=1.0, solvent=DMSO/Cd4 13

ANUSH\_TEMEA t20-055-2

Apr 23 2021

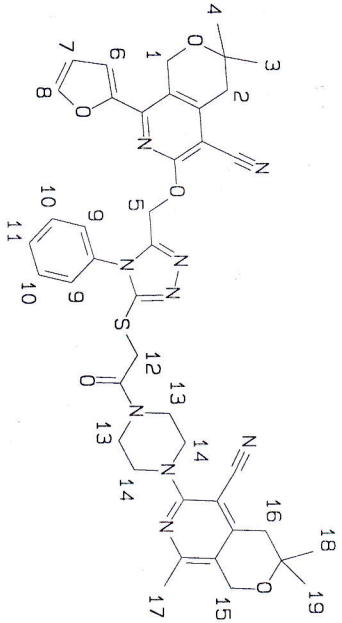

C<sub>42</sub>H<sub>43</sub>N<sub>9</sub>O<sub>5</sub>S

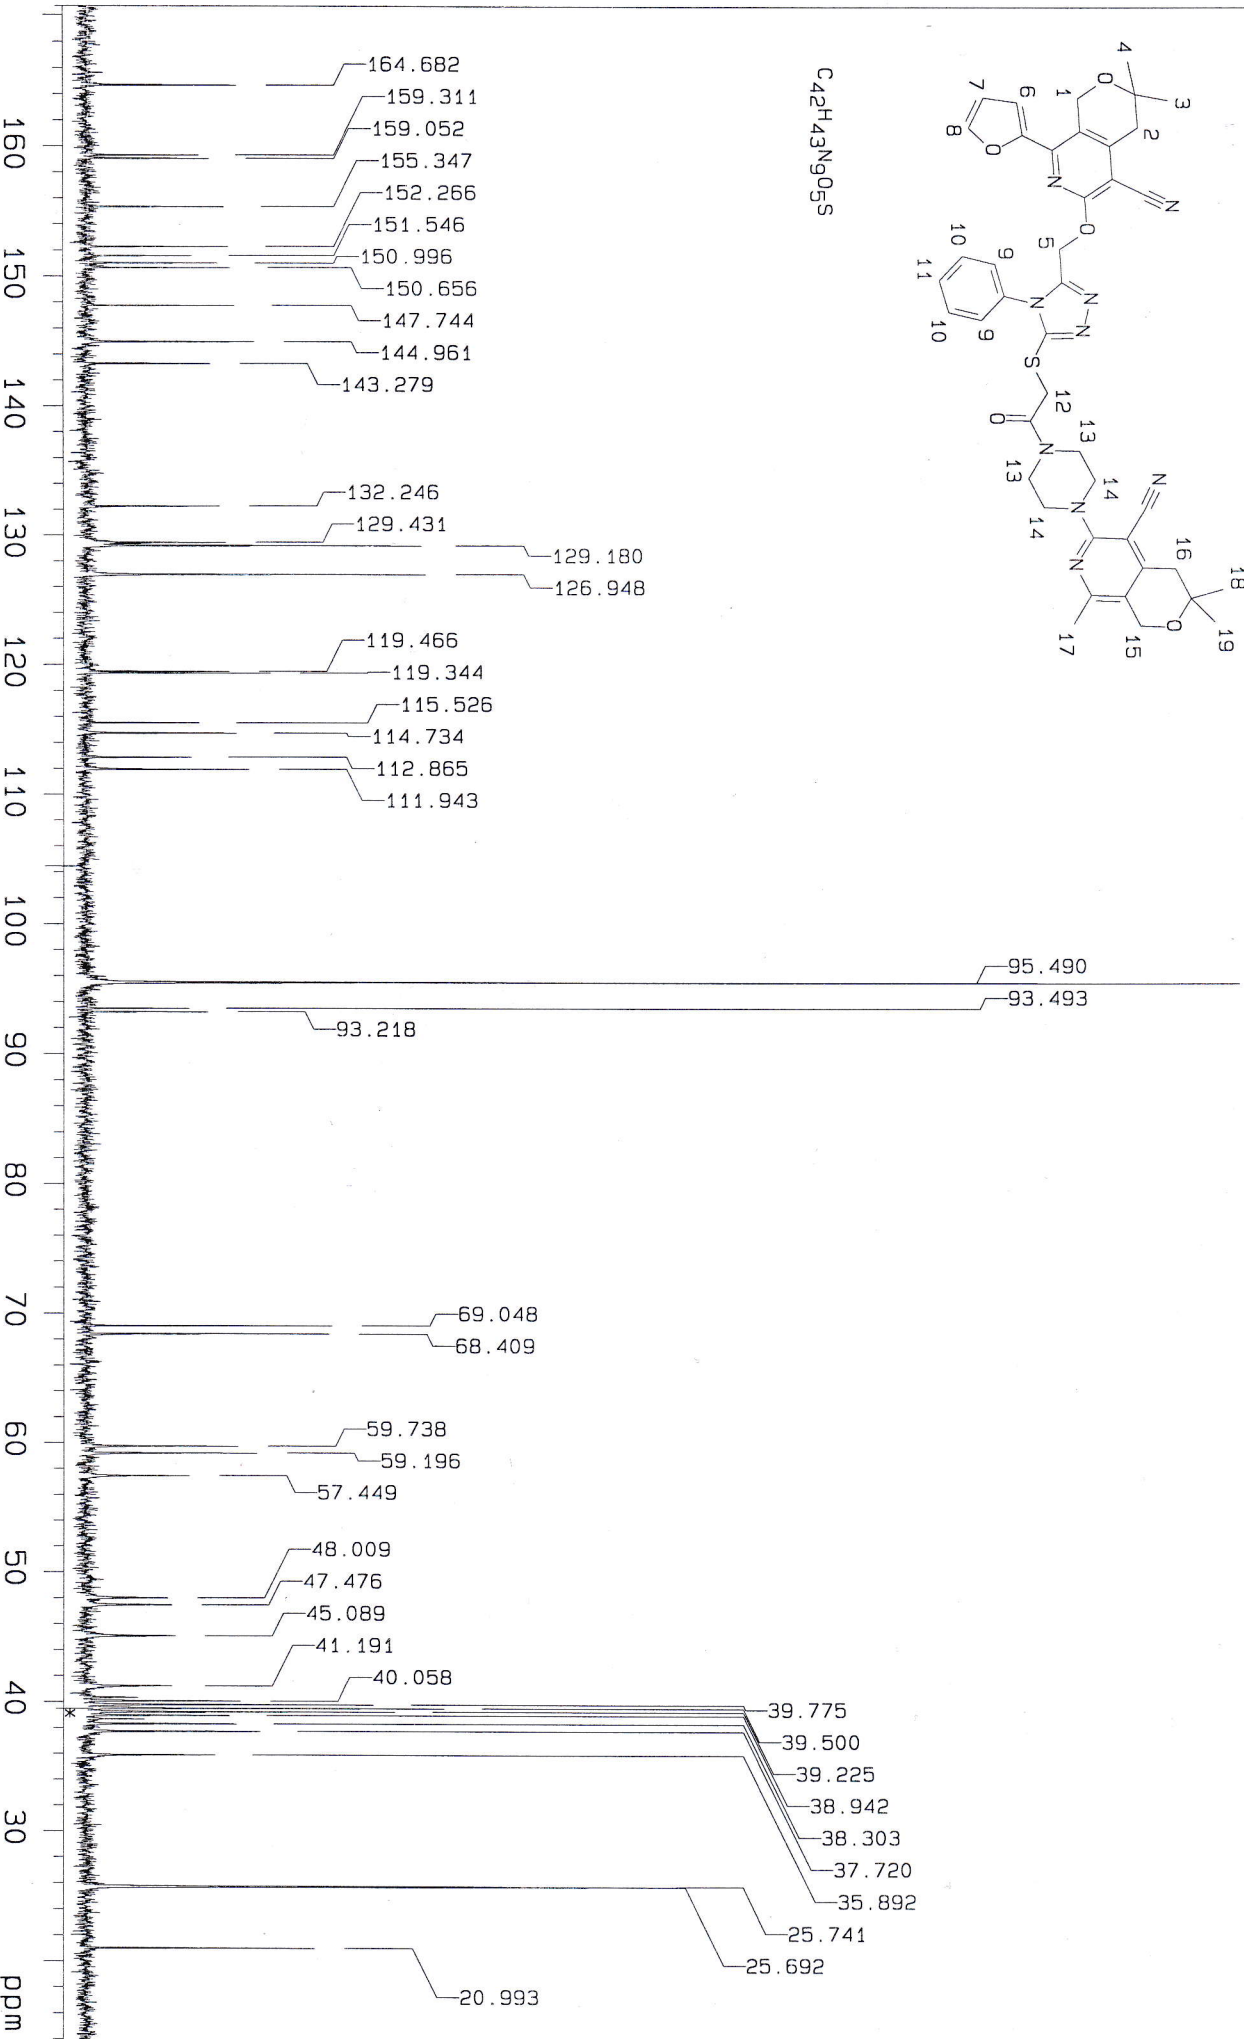

+ Prof

109

31.01.2024

T-20-055 n 7 (0.141) Cm (5:10-14:21)

311.1284

6.00000000

1: TOF MS ES+  
1.08e6

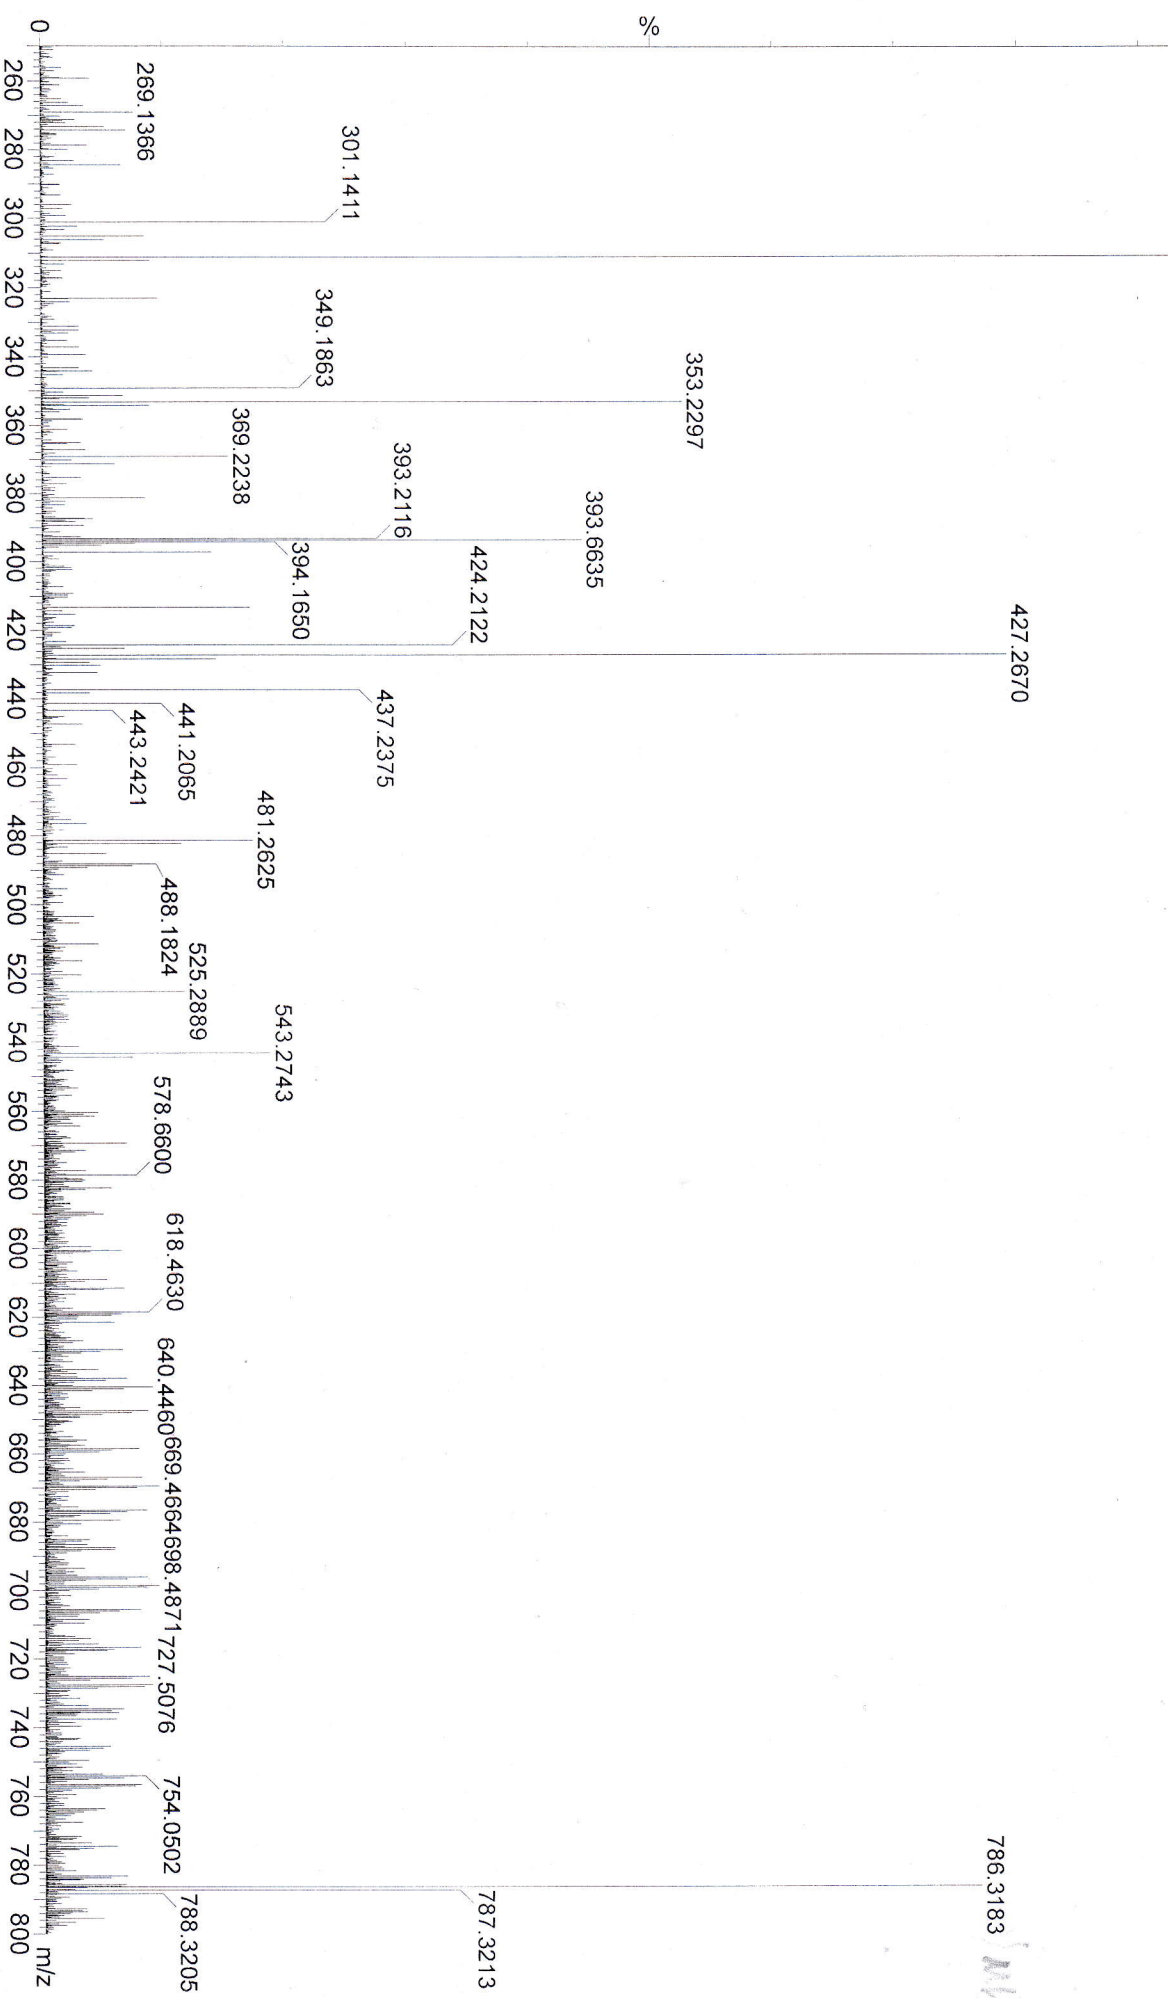

Supplement: d4ra06121g1.pdf [file d4ra06121g1.pdf]
